# Supplementary material
Source: Research Square preprint supplement (doi:10.21203/rs.3.rs-9327164/v1)
Supplement: Supplementary file 1 [file 0f2ed299da6aba040ab2bca1.xlsx]

## Sheet: Summary Sheet
Title	Predictive models and wild progenitor-derived introgression lines dissect the population dynamics of domestication syndrome traits associated with crop mimicry in weedy rice
Authors	Swayamsiddha Aswita Dhal, Anilkumar Chandrappa, Debashree Dalai, Anowar Hossain, Ashok Kumar Singh, Anarghya Brahmankodu Kumar, Virender Kumar, Soham Ray, Kshirod Kumar Jena, Nimai Prasad Mandal, Divya Balakrishnan, Kutubuddin A Molla, Pratik Satya, Chinmay Kumar Pradhan, Trilochan Mahapatra, Dipti Ranjan Pani*, Meera Kumari Kar** and Mridul Chakraborti***
Journal	Theoretical and Applied Genetics
Datasheet Title	Syntenic STMS markers identfied across the genomes of Oryza sativa ssp. japonica, O. sativa ssp. indica and O. rufipogon
Abbreviations used	CHR: Chromosome Number
	Exp. Amp. (bp): Expected Amplicon size in base pairs
	Position (Mb): Predicted physical position of the marker in respective chromosome of the species expressed in mega base strating with 0.000001 Mb position of respective chromosme short arm telomeric end
ID_Key	Species
Osaj	Oryza sativa ssp. japonica
Osai	Oryza sativa ssp. indica
Oruf	Oryza rufipogon
Basic data source for syntenic marker identification	Dalai D, Pani DR, Dhal SA, Behera M, Mondal TK, Tp MA, Vijayan J, Sarkar D, Ghose P, Roy A, Molla KA, C A, Bose LK, Mohapatra T, Ray S, Kar MK, Chakraborti M (2026) A robust 1K-core marker set for wild germplasm management and targeted pre-breeding of rice: development and applications. Theoretical and Applied Genetics 139(1):23. https://doi.org/10.1007/s00122-025-05133-1

## Sheet: Chr 1
SL. No.	Marker Information			Oryza sativa ssp. japonica			Oryza sativa ssp. indica			Oryza rufipogon
	Marker Name	Forward Primer Sequences	Reverse Primer Sequences	Osaj_CHR	Osaj_Position (Mb)	Osaj_Exp. Amp. (bp)	Osai_CHR	Osai_Position (Mb)	Osai_Exp. Amp. (bp)	Oruf_CHR	Oruf_Position (Mb)	Oruf_Exp. Amp. (bp)
1	RGNMS200b	AGTCAGGACATACAAAGCAAAG	ATTGGATGGGAAGATAGATATG	1	0.0153635	187	1	0.0431345	187	1	0.0267125	187
2	RM10001	CAATCACCCTCACCCTCTTATATGC	CCGCTGTGAACAACAATCATGC	1	0.026719	385	1	0.054505	387	1	0.038067	335
3	RGNMS427	ATATGCAAATGCTCATAACTGTAG	GTGTTCATTTCATTCAGTGATAGT	1	0.0267835	288	1	0.0545695	290	1	0.0381315	238
4	RGNMS173	AGAGAATGAAATGGATGAAATCT	AATGGATGAGTAATATCAGATGAA	1	0.060922	169	1	0.088708	169	1	0.068462	172
5	RM10002	TGGTTGGTTGGTCAGTGTCTGG	ATCTGCACCTGCATGCTACGC	1	0.0609565	171	1	0.0887425	171	1	0.0684965	174
6	RM10005	TTTCTTGTATCACCGTCGTCTGC	GAATTGATCCAGCGAACTTGAGC	1	0.082139	130	1	0.108906	130	1	0.089009	122
7	AUT10006	CCGCGAATCCATTCAGACTGC	TCTAGGAGGAGATGGCGGAGTAGC	1	0.084333	117	1	0.1111	117	1	0.091191	129
8	RGNMS435a	GTTCTTATCATCAATCCACACC	TAATTGAAGTCGTAATTGTAAAGC	1	0.141647	188	1	0.155783	189	1	0.122226	189
9	RM10007	AGGGATCCGCGTAACTACTCTCC	AGTGAAGTTCCCTTGCAACAACG	1	0.147315	88	1	0.161453	88	1	0.128079	88
10	RGNMS210	GTAACTACTCTCCTCTCCTCCTC	TCCTATTAGCATAACATAATCTGG	1	0.147325	342	1	0.161463	342	1	0.128089	342
11	AUT10008	CGAGGAGAATACTCGTTCGGTAGC	CCCTTCTCCATCTCATCTCACTCC	1	0.172004	171	1	0.20404	171	1	0.15342	166
12	RM10009	GATGCTCCGGAATAACTAGATTGG	GGAATTACAGCTGTCTTGGAAGG	1	0.188372	289	1	0.220597	304	1	0.168862	252
13	RGNMS212	ATTCCTGGCTTCCTTCCGATCT	AAACAAGGGTTTATGGCTATGG	1	0.189241	157	1	0.221479	156	1	0.169693	156
14	RGNMS263	AGTGTGCAGTGTGGGTTGTGTCT	AAGCTTGGGTTTGTCCTACGGAT	1	0.196717	363	1	0.229439	869	1	0.177148	363
15	RM10010	CTCGCCTCCTCAGGTTTAATTCG	TTACTAGTGATGGTGCCGGTTGG	1	0.201358	172	1	0.23403	166	1	0.182009	170
16	AUT10014	ATGATGATGGACGACGACAACG	TGAATCCAAGGTGCAGAGATGG	1	0.215967	177	1	0.24353	177	1	0.196628	177
17	RGNMS413	ACCAACAACTTAAGATCTGTGATA	ACTGCAGTACATACTAACCAGAGA	1	0.227249	262	1	0.26674	262	1	0.207804	262
18	RM10015	ACTGCAGTGAAGAATTGCTAGG	GTCCATGTACTCTGGATTGTAGC	1	0.227503	99	1	0.266995	98	1	0.208058	99
19	RM10017	GATTCCTCATTCCATGTCTTGC	AATTGTATGCCTGCATCTGTCC	1	0.250719	529	1	0.290899	524	1	0.231087	529
20	RGNMS25	TGCTAATGACATTCTTCTATTGTT	AGATTTATCGTGCATAAGTTCATA	1	0.251167	335	1	0.291341	331	1	0.231535	335
21	RGNMS487b	CTCTGCTTTCTTCAGTAGGAATA	GTGATATCGTCGGATCACAAAC	1	0.251992	343	1	0.292166	343	1	0.23236	343
22	RGNMS367a	AGTATTGTCATTTCCTTTAGTTTG	AGAAATTAAAGTCGATCTCTCCTA	1	0.272664	291	1	0.315385	299	1	0.253586	291
23	RGNMS236	TTAAGATTATCTATATGGCTGCTG	GGAGTAGTGTAGTAGGATAGGAGC	1	0.273348	349	1	0.316435	347	1	0.254271	349
24	RGNMS481	TTTCGTATTTATTATCTCGATCTG	AATTACTCCCTTATCTCCACATAG	1	0.2735	308	1	0.31658	300	1	0.254422	308
25	RGNMS54	TTTCGTATTTATTATCTCGATCTG	AATTACTCCCTTATCTCCACATAG	1	0.2735	308	1	0.31658	300	1	0.254422	308
26	RM8047	ATATTATTCTGAAATGCATGTAGG	TATACTATTAAACTTGCTCTCAAACT	1	0.299121	192	1	0.335189	277	1	0.272159	134
27	RM3252	GGTAACTTTGTTCCCATGCC	GGTCAATCATGCATGCAAGC	1	0.303031	171	1	0.337741	224	1	0.27486	169
28	RGNMS342	CTTCTTCCTTCCTCCTCCTTCC	ATTGAATTGGCTGGATCTTCTT	1	0.307831	118	1	0.343745	118	1	0.280811	118
29	RM10022	CCTCCATAGAGTAAGGTTTGCATGG	CCTCCTCCTCTGTCTTTCTCTGC	1	0.315827	176	1	0.394629	422	1	0.287788	176
30	RGNMS1	TTCTCTTTCCTAATTGTAGTTGAG	ATCAGTGTGTTAGTCTATCCAGAA	1	0.352131	301	1	0.431809	301	1	0.324149	303
31	AUT10023	GACTGATGGTCACTTGCAGTTCG	CTTTCCAAGCACAGCCTAAGTGG	1	0.385801	248	1	0.473696	267	1	0.357798	254
32	AUT10024	CCGTACCAAACACCAACACTGC	CGGCCGATCATCTAATCTAATCTACC	1	0.388916	141	1	0.476766	103	1	0.360922	121
33	RM4554	CCGTACCAAACACCAACACTGC	CGGCCGATCATCTAATCTAATCTACC	1	0.388916	141	1	0.476766	103	1	0.360922	121
34	RM10025	GCTTGAAGCATTTCATCTCCTCTTCC	CGTGCATTGATTCCAAGAAGATCC	1	0.395029	82	1	0.482845	82	1	0.367015	82
35	RM10026	AATCGATCCAAACAAGGCAAGC	TCACTAATAACCTGACGACCTCTGC	1	0.39535	151	1	0.483166	153	1	0.367337	149
36	RGNMS373b	TCATCACTCTCTTCTCTTCACTAA	AAAGACAACATTATTTGTGGGT	1	0.395496	234	1	0.483314	236	1	0.367482	232
37	RGNMS57	AACAAATCTGTTCTAATCTCGG	ACTTTATGGGAGGAAGGATAAA	1	0.395543	388	1	0.483361	390	1	0.367528	386
38	RGNMS290	AGCATAAACACTTATTGTATGACG	GAGCAGTACCAACGGCGGGTTC	1	0.437248	313	1	0.54789	306	1	0.406838	313
39	AUT10031	CCATATCTACTCCCGGTTTCTGC	GTCGAAGCAGCCGTAGTAGTGG	1	0.49758	296	1	0.63416	296	1	0.453929	296
40	RM10032	CGCCGCCTCCTACAGAACAACC	GTGTACGTCTTCCGAGGTTTGAGAGG	1	0.522145	79	1	0.658724	79	1	0.477575	79
41	RGNMS349	CTGCTCAACCCTAAATTGCTTC	AGTTATCTCGGAGAAGGAACAG	1	0.526891	99	1	0.66347	99	1	0.48232	99
42	RGNMS380	CTGCTCAACCCTAAATTGCTTC	AGTTATCTCGGAGAAGGAACAG	1	0.526891	99	1	0.66347	99	1	0.48232	99
43	AUT10036	TCGTGCAGGAGGTCTTCATGG	TTGAGGATGGTAACGAACCTTGC	1	0.548521	399	1	0.68875	419	1	0.50521	395
44	RM10037	CCTTGCTAGCTCAGAGACACAGTGC	AGCGGTTGAACTGTTGCAGAAGG	1	0.562792	290	1	0.703018	260	1	0.519477	270
45	RGNMS417b	AGAAGCCAACCATTATAACCAC	TAGTGCTATGCTATAGTGTGTGTG	1	0.625024	111	1	0.762023	111	1	0.581696	111
46	RM10041	GAGAGGGAGGTGGAGAGGAAGG	GGCCAGTAAACACACTAAACGAACC	1	0.637768	358	1	0.774877	368	1	0.594442	358
47	RM10044	AGAGTTGGTTGGTTCACCTCTCG	AGGAGAGGAGGAGATGGAGTCG	1	0.650471	298	1	0.787387	301	1	0.607345	298
48	RM10045	AAACTCAAACGCGCTGAGATCC	ATCACCGCGCACAATATCAGG	1	0.67588	284	1	0.825102	290	1	0.622305	278
49	RM10054	CGGCTTCATGGCTTCAGCTACC	GACGAGAGGAGGCATGCAGAGC	1	1.05873	86	1	1.13203	86	1	0.94706	86
50	RM10055	AGGATGGGTTGAACATTCTGTACC	GATCACCTTCGACCATCACATAGC	1	1.07769	124	1	1.17831	124	1	0.965654	124
51	RGNMS454b	CTCCACTCTCCTACGCTTCCAC	GATGTCTCCGGAAGCGATCTAC	1	1.17834	359	1	1.44344	359	1	1.06268	359
52	RM10059	ACATGCTCTACTCCGTGCTCACC	AAAGCAATCCGCTTACGTCTCC	1	1.18062	379	1	1.44573	379	1	1.06497	379
53	RM10060	GAGATGCGTGCAGTGACAAGG	CCAGAATAAATGCCATGCAGTCG	1	1.21235	349	1	1.47747	382	1	1.09684	346
54	RGNMS460	CGAAGCGTGAGAGAGAAACGTA	GATGTCAGAGGCGGAGGAGGAG	1	1.23151	176	1	1.50285	176	1	1.11621	176
55	RM10061	CTGGTCGCTGTGGATGGTCAGG	GCGGCCACCATGATCTTGTACC	1	1.23878	86	1	1.51113	86	1	1.12347	86
56	AUT10063	CTCGGCTAGTGACGATTTCTTGG	ACGTCGTGGTAGGCGACATAGC	1	1.25361	223	1	1.52596	223	1	1.13721	223
57	RM10064	GCGGTACAGGTGCAAGATGTGG	CATGTCCACCATGACCATGTCC	1	1.26405	99	1	1.53788	99	1	1.14131	99
58	RGNMS486	CCTAAGTTACATACAAACAACTGG	TGTGCTAGTGATGAGTCGAGTA	1	1.34513	103	1	1.64816	103	1	1.22673	103
59	RM10074	GTCGCGGGTACATGACACAAGC	CGAGCTGTTACGGCAATCTCTATGG	1	1.34586	195	1	1.64889	191	1	1.22746	163
60	RM10076	CTAGCAGCTGTCTGCGACACACG	CCGAGGTGTTATGCCAATCTCTATGG	1	1.35126	187	1	1.65427	209	1	1.2332	165
61	RM10077	TAGCTCGTGTTCGGCTGGATACC	AATCTCGTGCACAGCCAGACAGC	1	1.36001	193	1	1.66305	241	1	1.24193	183
62	RM10081	AAAGAGATCGCTCTCGGTAGTAAGC	CGTGTTACCTGGGTCTCTGACG	1	1.51214	165	1	1.80571	165	1	1.36283	155
63	RM10082	CGTTGGTGTTAGCATACACTATGTCG	GAACACACCAGGAAGCCACTACC	1	1.53555	274	1	1.85189	274	1	1.37913	278
64	RM10083	CAAGAGAAGAGGGAGGAGAGATGC	AGCTTTGACAGATTGCCCTGACC	1	1.55018	370	1	1.86649	338	1	1.39401	359
65	RGNMS307	GAGAGGACGAGACCAGTAGTAG	TAGAGAGTAACACGGAGTGTTGTA	1	1.56553	159	1	1.88182	159	1	1.40934	159
66	AUT10084	CGTTCAAAGCGAGCTTAATTGC	CTACGGCGGCTAAACATAACTCC	1	1.5657	391	1	1.88199	379	1	1.40952	353
67	AUT10085	CAGAACCAGGGCTTTGTAAGAGG	AACCTGTGGTTGCATTGTGTAGG	1	1.62243	141	1	1.91677	141	1	1.44711	139
68	RM10086	GTCCAATCCACAATCTCTTCTCC	AGTGTGTGTATTGTGGTGTGTGG	1	1.6275	386	1	1.98312	391	1	1.4524	389
69	RM10088	TTTGCATACCGTCTCTCTGAGC	TCGTGAAATGTTCTACCTGTCG	1	1.65424	526	1	2.01144	942	1	1.47741	454
70	RM10089	TTTGCATACCGTCTCTCTGAGC	TCGTGAAATGTTCTACCTGTCG	1	1.65424	526	1	2.01144	942	1	1.47741	454
71	AUT10090	GATTTCGATCTGACTGTCCCTAGC	CTTTCTTTCTCAGCTGCTTGTGC	1	1.65809	145	1	2.01571	159	1	1.4812	132
72	AUT10091	GTGTCATATGCAAGCAACAACTCC	AGTATGTACGTCTCCTCCGTTGC	1	1.65918	231	1	2.01682	259	1	1.48231	219
73	AUT10094	CAAACGGAGTGAGTACATTAGC	TGATGTGTTCTGTACAGGTTCC	1	1.66915	262	1	2.02742	262	1	1.49236	256
74	RM10096	AGCCGTATTATTCGCTCAAACG	ACCCTTGTGCATCAGCAGTAGC	1	1.67132	261	1	2.02959	261	1	1.49456	264
75	RGNMS387	CAGTAGAGGAGGAGTACTGACACT	GTACAGAGAGAGCAGTAGACTGTG	1	1.69725	154	1	2.05688	154	1	1.52483	154
76	RM10098	GTGAAAGGGTCGTCAGAGAAAGC	CTACCACAACTGCTCCCTGTCC	1	1.70562	291	1	2.06526	285	1	1.53317	286
77	RM10099	CTCCAAATGTCGTCGTCGAAGG	CGCTGAAGAGGAGGCATGAAGC	1	1.71138	496	1	2.06984	496	1	1.53884	496
78	AUT10100	GTTGAGCTGAGAGGTGATGAACC	CTTCTGTTCTTGGCTTGGTTTCC	1	1.77572	237	1	2.1333	231	1	1.60299	231
79	AUT10102	GCTAGTCTGATGAATGCCGGTAGG	GCCATGTGGCAATCTGAGAGC	1	1.79388	198	1	2.15109	215	1	1.621	312
80	RM10105	CGGAGAATAAGGATCCCAGAGC	AGGCCTGTTCATGTCTTTGATGC	1	1.84196	154	1	2.19708	152	1	1.67209	148
81	RM10106	CAGCAAGCTGATCTGCAACTCC	CAGATACCAACTTTACTTGCCACTCC	1	1.84775	198	1	2.20287	190	1	1.67784	191
82	RGNMS452	AATCACACAAACCTGCGTGCAAAG	GTTACTGCTTGGTTAGTTTGTTG	1	1.93314	106	1	2.27954	106	1	1.75644	106
83	RM10110	TGTCACAGCAGCTGGTAATACTTGG	GCAACAGCAGCAATCATACATGG	1	2.08141	176	1	2.45081	173	1	1.8743	176
84	RM10112	TCTCCTCACTCCATCCAGCTCACC	AGCCAGCACGAGTGACCTGTAGC	1	2.11948	372	1	2.51956	372	1	1.91203	375
85	RM10114	TGGTCGTCTTCTCCTGCAACTCC	GATCAACTCGTCTTCCTCCATTGC	1	2.15336	112	1	2.55542	115	1	1.94625	118
86	RM10115	ACAAGACGAGGTAACACGCAAGC	GCGAAGGATCAACGATGATATGG	1	2.15428	245	1	2.56995	212	1	1.94718	200
87	AUT10116	TCCCACTTGCAGACGTAGGTAGG	CACTGATCTGATGCAACTGTTTGG	1	2.16915	146	1	2.59089	134	1	1.96188	156
88	AUT10118	GTTCCAGCATCATCCATCTGC	GGGCATGTAAGAAATGTGGAAGC	1	2.17647	499	1	2.59814	471	1	1.96925	468
89	RM10120	GCCTCTTGCAGTGCCTCCTTGG	GCCGCCAAGTTCACCGAGTACC	1	2.22817	205	1	2.62966	196	1	2.00042	180
90	RM10121	CCGATCCTATCCATGCAGTTTCC	GTTATCGATCGCACCTTCAAACC	1	2.22986	295	1	2.63133	270	1	2.00209	346
91	RM10122	CCTCCTCAGCATCCTCCTCTCC	CTCGTACTCTCACCGACACATGG	1	2.25385	178	1	2.65562	178	1	2.02567	178
92	RM10123	ACACATCCCTCATCATCATCTCC	GAATCCGATCTTGTTCTGATACCC	1	2.28296	159	1	2.68808	152	1	2.05479	158
93	RM10124	AGATCAGCATGGGTACATTCACTAGG	AATCAGCAGTGTTAGATGCCAAGG	1	2.30973	341	1	2.70603	341	1	2.07387	341
94	AUT10125	CTGTACAAGAACGGCAGCAACC	GCACCACCAAACAGAGACAGAGG	1	2.37683	146	1	2.82386	119	1	2.13641	131
95	RM10131	AGGTTTACGTATGTCGCCTCTGC	CAGCTCACGATGGTCAGTACGC	1	2.54726	343	1	2.96038	351	1	2.22481	337
96	RM10132	CCAGGGCACTACGGCAATCACC	GGCAGTCGTTGATGTACATTGTGACG	1	2.56583	165	1	2.98531	183	1	2.24616	177
97	RM10134	GTTCGGAGTTCCTCACCTCTAGC	AGGTTAGGTCAGGTCAGGTACGG	1	2.62199	247	1	3.0554	250	1	2.31401	252
98	RM10136	GGTGGGACTGAGGCTTAATCG	GTACACCGTGGTGAACAACTTGC	1	2.65177	255	1	3.0917	249	1	2.34671	249
99	RGNMS177	GAATTCAGTTTGATCAGTGGTT	AATCTACTACGCTGTTGATTACTG	1	2.71686	149	1	3.18507	149	1	2.40015	149
100	RM10138	AGAGCCAGCTCTACCTTCTTCC	CACACTGGATAACAATGTCACG	1	2.74995	413	1	3.21325	401	1	2.43156	449
101	AUT10142	CCCGTCACCAACTCACCATAGG	CTAAGCCACCCTTACCACCATCC	1	2.80007	122	1	3.22158	109	1	2.48027	124
102	RGNMS266	ACTCGCCTCCCTCCTCCTCTCAG	TTCTTTAAATTTATTGGTAGTTGA	1	2.92495	1463	1	3.40249	1461	1	2.5942	1463
103	RM10145	GAGTCTCGACTGGACTCCTCTCC	AACAGACAACAGAACCGCATAGC	1	2.97935	236	1	3.46891	234	1	2.64107	234
104	RM10147	GAGAGGAACGAGAAAGAGGATAAGC	CCCTATCTTTACCCTAGTCGATCTCC	1	2.9881	195	1	3.47895	192	1	2.64983	195
105	RM10153	GCGACCGAATAAATTTCCAAGG	AAATACGAGAGCCCTTTCCATCC	1	3.10405	226	1	3.60247	233	1	2.75579	224
106	RGNMS278	CTACTCCACACCGCACAGACAA	TTCCAAGGGAGTAGATAGATAGAG	1	3.10422	171	1	3.60263	175	1	2.75595	169
107	RM10165	GAGGCCCTTAAACAAATCCATGC	CCTTGCTGTACCTTGGTTGTATGC	1	3.37457	182	1	3.80683	182	1	3.02118	182
108	RM10168	GTGCTTGGTGGTGGCATGTACG	TTCTCAATACCTGCGGGAACAGC	1	3.40063	198	1	3.83276	198	1	3.04764	198
109	AUT10169	GGAGAAGAGATTACCGGAGAGAGC	CTCCTCTCCTTCTCCAGGTTGG	1	3.48345	94	1	3.91654	90	1	3.13337	86
110	RM10171	CGAGTCGACGACGATATCCAAACC	GAAGCTCGACGCCGAGAAGTGC	1	3.50005	456	1	3.93709	459	1	3.15014	456
111	RM10172	CGAGTCGACGACGATATCCAAACC	GAAGCTCGACGCCGAGAAGTGC	1	3.50005	456	1	3.93709	459	1	3.15014	456
112	RM10173	AACAGTTGCCATGGACTATTCAGC	TTTCGAGACTATGCATGCTGTGC	1	3.54422	355	1	3.99271	373	1	3.19423	355
113	RM10176	AGCACCATCAGCTCAGCTACTCC	GAAGGCTTCTGTCAAGACGATCC	1	3.63773	113	1	4.1007	113	1	3.28521	101
114	RM10177	GTGCACACCTAGCCTCTATTTGC	AGATGTTAGGCAAGGGAACAAGC	1	3.6411	182	1	4.10372	182	1	3.28858	182
115	RGNMS377	TCAGTATTAGCTGACTGATTGATT	GATGATCACCATAGATAAAGTTGA	1	3.65503	365	1	4.11687	365	1	3.30196	365
116	RM10178	CCGCCATACTTATCAAGAACACACC	GGATTTGAGGCCGACAAGAGG	1	3.66413	290	1	4.12536	276	1	3.31107	278
117	RM10179	GGAAAGGCGCAATGAGTGATCG	GGAAATGACAAAGCCCAAGAGAGC	1	3.66508	194	1	4.12627	192	1	3.312	192
118	RM10180	TCTCTCTTCTGGCCCTACAAACG	GAACCGGATGAGTGTTAATGAGC	1	3.67281	299	1	4.134	290	1	3.31974	291
119	RM10182	CTTGGTGTTGGACACCTGGATGC	GATCTGCGGAGAGCGAGCTACC	1	3.74325	199	1	4.20634	199	1	3.39172	199
120	RM10189	CCCAGCGACTGACATCGAACC	TTATCTTACACGGCTCTGTGATGTGC	1	3.7604	285	1	4.21232	214	1	3.39834	357
121	RM10190	CCCAGCGACTGACATCGAACC	TTATCTTACACGGCTCTGTGATGTGC	1	3.7604	285	1	4.21232	214	1	3.39834	357
122	AUT10195	CACAAACCGAAAGTTGCCCTTCC	TTCGGAGAAGACCGAGACGTAGATGC	1	3.80247	167	1	4.27603	148	1	3.44075	188
123	RM10196	AGGTTCGTTCGTACGATGGTTGG	CGAAATCACTCGAGCTTCACACC	1	3.82323	235	1	4.25472	235	1	3.46149	235
124	RM10198	CTCCACACAAGGACACACATGC	GCCTCAAAGGTAGGTTTGCTTCC	1	3.87291	176	1	4.34679	179	1	3.51047	176
125	RGNMS104	ACTTCCTCATACATTCCTACTTTC	AATCCAGTTGCTTCTGTTTACT	1	3.87728	120	1	4.35285	120	1	3.51484	120
126	RM10206	CTGACTATGTGGGCTGCATGG	TTTGGTAATTGCGAGCACATGG	1	3.94409	89	1	4.41244	83	1	3.57758	83
127	RM10207	GATCATCACCAAGAGCTCCTCTGC	GAATCCAGATTCCATCCATCCATCC	1	3.94452	192	1	4.41287	195	1	3.57801	201
128	AUT10208	CGGAGCTCAATCGAATCTAGACC	TTCCTCATATCCTCCAGCTCTTAGC	1	3.94686	191	1	4.41522	183	1	3.58037	175
129	RM10209	AGCGACCAACCCTAATTATTGC	TCTCCCTGCTGCTACTACTCTTGG	1	3.94997	186	1	4.41829	187	1	3.58346	187
130	RM10213	GCAAGAAGTTACCATGCCTTTGC	GATCGAGATCGAATGTGAGAAGG	1	3.95164	252	1	4.4199	268	1	3.5851	258
131	RM10217	GCACTCACTCTCACTGATCACTTGC	CTCGTGTTGTGTTGGTGTGTTGC	1	3.96266	97	1	4.43133	93	1	3.5961	93
132	RM10218	AGCTAGCCCTCTTGTCTCCATGC	CACACTAGCACAGTGGCATACTGG	1	3.9631	179	1	4.43177	175	1	3.59653	179
133	RM10219	GAATTCCTGCGAATGAGAGAACC	GAGTTCAGGGACAAGCAGTTGG	1	3.96494	280	1	4.4336	268	1	3.59837	286
134	RM10220	GAATTCCTGCGAATGAGAGAACC	GAGTTCAGGGACAAGCAGTTGG	1	3.96494	280	1	4.4336	268	1	3.59837	286
135	RM10222	TCATCACAGCAGATCCAAATGC	CGTTGTTGCTGTGGTTGTTGC	1	3.9776	94	1	4.44677	94	1	3.61164	94
136	RM10224	CACATACGTGTGGTGTCTGATCC	TTCAGTTACCCAGCATTGTCAGC	1	3.99606	98	1	4.46529	95	1	3.63012	98
137	RM10225	AGAAGAGACAACACAGCATGTCC	GCAGCTGCAAGAATTACAAGAGC	1	4.00226	259	1	4.47243	260	1	3.63599	259
138	RM10226	GATCATCATCATCCATCCATCC	AAGGGAGAAATTGGTGGAGAGC	1	4.00515	342	1	4.47533	346	1	3.63888	324
139	RM10227	CTTTCCATCGATAGCCACATTAGC	CGTTAATTAGCAGCAGCAGGTATGC	1	4.01023	159	1	4.48042	159	1	3.64395	159
140	RM10228	CGGAGGGAATATATGTTAGTGACC	GGATGCGAGGGATATTAGTTAGG	1	4.01085	463	1	4.48103	469	1	3.64456	813
141	AUT10229	CCGATGATGGAAGCACAGATAGG	TTCTCATTCTCGAAGGCTTACGG	1	4.05164	390	1	4.52947	368	1	3.68572	396
142	RM8105	CCGATGATGGAAGCACAGATAGG	TTCTCATTCTCGAAGGCTTACGG	1	4.05164	390	1	4.52947	368	1	3.68572	396
143	RM10230	CCCAACATCTAAACAAGACAGAGG	CTCATGCTTATCCTCCAACTTCG	1	4.05651	193	1	4.53468	193	1	3.69059	193
144	RM10231	CTAGTAGGACATCCCGTTCTCAAACC	GGAGAATCGAATTCAAACCCTTGG	1	4.06053	193	1	4.53819	215	1	3.69411	187
145	RM10232	CTAGTAGGACATCCCGTTCTCAAACC	GGAGAATCGAATTCAAACCCTTGG	1	4.06053	193	1	4.53819	215	1	3.69411	187
146	RM10236	GAGACGCTCAAGAAGAAGAAGAAGG	CATGCACATCACAGACAAATAGGC	1	4.12284	366	1	4.60107	375	1	3.75741	366
147	RM10241	AGAAAGCTACAGCCAAAGCAAGC	GGACCATAAGGATTGGCACTAGC	1	4.1744	122	1	4.65258	122	1	3.80908	122
148	RGNMS116	GGGATATATGTGGTTGTATAGATG	CAACACATAAGAAGAACAACTCTC	1	4.17835	188	1	4.6568	188	1	3.81304	188
149	RM10242	CCAATTCCTTCGGTCTTTCTTGC	GTGAGTTTGTGTGGGCAGTTACG	1	4.19247	439	1	4.66431	414	1	3.82172	561
150	AUT10244	AGCCCAGAGGGAGTAACTTAACAACC	CACACATCTTGATATGCTGGAAGC	1	4.20724	157	1	4.6735	145	1	3.83148	143
151	AUT10245	AGCCCAGAGGGAGTAACTTAACAACC	CACACATCTTGATATGCTGGAAGC	1	4.20724	157	1	4.6735	145	1	3.83148	143
152	RGNMS121	CTCACATTGCTATCTATCATCAGT	TCATTATCTCACAGCAGAAGTAGT	1	4.21438	335	1	4.68064	335	1	3.83853	336
153	AUT10246	AACAGCAAGAACACCACCTCACC	CGTGAGATCGAGAGTGTGAGAGG	1	4.21619	79	1	4.68246	73	1	3.84034	82
154	AUT10248	TAGAGTGTGAAAGCCTCAATCC	CAGACCAAGCCAAATCTAGAGG	1	4.23907	393	1	4.70532	387	1	3.86322	385
155	RM10249	GAAGAAGAAGAAGAGGCGGATGC	GTTTGTTGCTGCTTACAACCTTACGC	1	4.24364	359	1	4.70987	433	1	3.8678	345
156	RGNMS449	ACCACCACAGCCGCCTCTCATA	TTATTCAGATCTAATGAACAGCTC	1	4.25286	609	1	4.7197	606	1	3.87725	609
157	AUT10251	CAGACGCTTTAATAGCTGGTATGTGC	CCCTACGACGCCTACAGCTACG	1	4.31692	444	1	4.77581	443	1	3.9692	444
158	RGNMS146	GCTGTTACTGTTGTTTAATTTGTC	TAATATTACTCGGCTACGTACAAC	1	4.3463	107	1	4.80468	107	1	3.99798	107
159	RM10253	ATCAGCTTGTGGATCGGAGTCG	GCTTGCTTCCTCTACCTAGCTCTCC	1	4.34641	80	1	4.80479	80	1	3.99809	80
160	RGNMS53e	TTGCTTCCTCTACCTAGCTCT	TATTACTCGGCTACGTACAACA	1	4.34646	265	1	4.80485	269	1	3.99815	265
161	RGNMS140	CTTGCTTCCTCTACCTAGCTCT	CACCAGCCTAACTAACTAACATAA	1	4.34646	222	1	4.80485	226	1	3.99815	222
162	RM10255	GATTCACACATAGAGTGACTGTCG	CTTTGCCAGGAGAGTTCTAACG	1	4.3535	118	1	4.81105	146	1	4.00521	103
163	RM10256	CTCCCTCGATGATCGCCTTCC	ACCATGGCGTCCTAGGTTACAGC	1	4.35492	294	1	4.81247	296	1	4.00658	300
164	AUT10260	AGTTCATCAACGCGAGGGTACG	AGCAGAACACGAGGAGAATGAGC	1	4.39451	140	1	4.8449	124	1	4.03706	98
165	RM10268	TTGTTGGTGTCGCCTGATACCG	GTAACAGTCGCGCCGTTGTCC	1	4.57854	243	1	5.00618	238	1	4.20851	239
166	RM1	GCGAAAACACAATGCAAAAA	GCGTTGGTTGGACCTGAC	1	4.63679	77	1	5.05075	111		4.2524	93
167	RM10272	CGCTGTCTATTTAAACGCTTGTCG	CCGCCGACTTATATCTTGTCACC	1	4.65661	475	1	5.06526	465	1	4.26719	469
168	RGNMS37	GAGAGAGAAACTAAACCCAACC	AGACTCCAGCCGCTAGAAGAGT	1	4.67242	155	1	5.08072	158	1	4.28271	167
169	RM10274	CTTCTAGCGGCTGGAGTCTGATGC	GAGAGGTTGGCGGAGATGACG	1	4.67256	407	1	5.08086	406	1	4.28286	404
170	RGNMS229	GGTGTACTTGATCCATTATTTGTA	CTTGTGTTATCCAATCAGGTAGTA	1	4.68351	197	1	5.09183	197	1	4.29382	197
171	RGNMS90b	AACAAGAAGACAGATAGAGAAGGA	GTGACACCACGAGATCACCAAA	1	4.71773	99	1	5.12608	99	1	4.33099	90
172	RGNMS124	CTTCCTCCGTATATATCAATCATC	ATTCCCTCTCCTCTGCTTCCTT	1	4.72571	174	1	5.134	164	1	4.33928	169
173	RM10277	AGCAGGTCTTCTTCCCTTCTTGG	AAGCTCCAGGCTTTCTGCTATCC	1	4.72598	119	1	5.13427	119	1	4.33955	123
174	RGNMS243b	AATCATAATATATCCCTGGTCAAT	AGAAGCCTTCATACTAGCAGATAC	1	4.73364	326	1	5.14306	325	1	4.34722	326
175	AUT10282	CAGTCGCACTAACTGAACAACACC	CACGGACAGATCAGTTTCTTTCG	1	4.80266	138	1	5.2075	142	1	4.40901	138
176	RGNMS112	CAAGCTAGCTCCTACTACTCCTAC	AGCAAGAATCACTACTCCCTACTA	1	4.81594	184	1	5.21962	178	1	4.42423	184
177	RGNMS258	CAAGCTAGCTCCTACTACTCCTAC	AGCAAGAATCACTACTCCCTACTA	1	4.81594	184	1	5.21962	178	1	4.42423	184
178	RGNMS273	ATTGCAAGAAGGAAGAGGACTAC	GTACATCCAAGTGCACTGTTAAAT	1	4.82744	254	1	5.23114	259	1	4.43906	254
179	RM10284	TCTGGAGTAGCCATTCAAGAAGC	GACAGCAAGAAATCCCGACTAGG	1	4.8482	220	1	5.24545	212	1	4.45304	222
180	AUT10285	GGCATGAGAGTCTGTGATGTTGG	TAGTACTGCTCCATCTGCCTTGG	1	4.88593	115	1	5.27041	111	1	4.47788	107
181	RM8145	GGCATGAGAGTCTGTGATGTTGG	TAGTACTGCTCCATCTGCCTTGG	1	4.88593	115	1	5.27041	111	1	4.47788	107
182	AUT10286	AGCAGCGCCAGTGTGAGAACC	CCATTCTGCTTCGAGGATGAAACC	1	4.90811	191	1	5.29329	161	1	4.50011	185
183	AUT10287	GTATTCCTTGCTGCTGCTGATGG	GACTGGAGATGTGATCGGAAACC	1	4.96642	183	1	5.34104	165	1	4.54832	189
184	RGNMS194	CCTCCCTTATTAAGCTACTAGATG	CAGGCCAAGAACCACAAGAACA	1	4.9724	159	1	5.35206	159	1	4.55463	159
185	RGNMS393	CCTCCCTTATTAAGCTACTAGATG	CAAGAACAACAAGAAGAAGAAGT	1	4.9724	136	1	5.35206	136	1	4.55463	136
186	RGNMS79	CCTCCCTTATTAAGCTACTAGATG	CAGGCCAAGAACCACAAGAACA	1	4.9724	159	1	5.35206	159	1	4.55463	159
187	RM10289	CTTGATTGGCTCTTCTGTCAATGG	GAATTCGATCTGCATCTGTCACG	1	4.98907	88	1	5.36776	88	1	4.5708	88
188	RM10290	CATCTCGATCAGTCCACCATGC	AGGATTACCATGGCCTCAAGAGC	1	5.0027	121	1	5.38168	157	1	4.58443	137
189	RM10294	AAATCCCAGATGGCAGGAGAGC	AGGAGAAGCTGCAAGTTCCATCG	1	5.05369	356	1	5.44069	356	1	4.63507	356
190	AUT10295	GAAATTCGAAATGGAGGGAGAGC	GGTGAGTAAACAGTGGTGGTGAGC	1	5.05487	131	1	5.44187	141	1	4.63624	129
191	RM10296	AAGAGGACCTGCGCCATGAACG	CATCCCTTTCGCCTTCGACTTCC	1	5.06362	652	1	5.45038	653	1	4.64474	644
192	RM10297	CCCTGAGACATAACCACTTCATTTCC	CCGTCAACTTTACTCTTTCGTTGG	1	5.08329	296	1	5.47492	296	1	4.66467	296
193	AUT10299	GCTTCAGGAGCTCTCCAAAGAGG	CTAGCTCCGTGTCAGCAACACC	1	5.09817	256	1	5.49102	256	1	4.6795	270
194	RM10300	AAAGACAGAATGCCCAGCGATCC	CCTCCACCCATTGGATGACACC	1	5.09837	181	1	5.49123	179	1	4.67972	181
195	RGNMS354a	CTCGTTTCTTGCTGAGATTATAG	GCTGATTATGATATCTGAACGTAT	1	5.09873	268	1	5.49159	265	1	4.68008	265
196	RM10301	TCTCCCGGTCAGTCGTCTCTCG	CGCAACCCGATCATCAGAACC	1	5.09967	80	1	5.49252	80	1	4.68101	80
197	RM10302	GTGGCGGATGTGCTTGATCACC	GACGTCGACGAGAACCCGAAGC	1	5.09989	283	1	5.49274	283	1	4.68123	311
198	RGNMS351	ATGGATGAATAGCGAATGAATC	AAGAACATCGAATTATTAAACCTC	1	5.10068	195	1	5.49353	195	1	4.68205	195
199	RM10303	TCACTACTACACCCAGCTCGTTCC	TCTCCCTCCTTCACCTGTCTCC	1	5.10422	142	1	5.49706	140	1	4.68559	138
200	AUT10304	CAGCAGCAAGAACCCTAGAAATCC	CTCGTGATCAACCGACAAAGC	1	5.11617	98	1	5.509	88	1	4.69756	480
201	AUT10305	CAGGAACCAACCTTCTTCTTGACC	GTCAGACTCCGATCTGGGATGG	1	5.13928	166	1	5.53543	150	1	4.72069	150
202	RM10310	TGCAGTAATATGCTGTGCTGATCG	AAGCTAGCTCGATTGGTCGAACG	1	5.20097	85	1	5.59875	81	1	4.76526	81
203	AUT10313	ACTTACACAAGGCCGGGAAAGG	TGGTAGTGGTAACTCTACTCCGATGG	1	5.23644	170	1	5.6354	150	1	4.80113	152
204	RM10314	CATGCATACTTTGTGCCTTGTCC	GCACGTGCTCCTACATTGATGC	1	5.24172	168	1	5.64066	172	1	4.8064	156
205	RGNMS68	TACCGATCACCATACTCAACTA	TGATCATATCCCTTGCTAGAGT	1	5.24304	281	1	5.64202	281	1	4.80774	278
206	RM10315	CAAGTTGCACACACCAAGATGC	CCCTCCTGATCATATCCCTTGC	1	5.24316	170	1	5.64214	170	1	4.80785	167
207	RM10316	AAGATCGCTGGGAGATCTGTAGG	GCATGCTAATTAGTCAGCCTTGG	1	5.28648	148	1	5.68606	148	1	4.84931	152
208	RGNMS382a	GAGCGAGCGCGAATACTAAAGC	AGGAAATTAATTAACCGAGGAA	1	5.35165	145	1	5.74941	145	1	4.91337	145
209	RM10318	TGTCTCACACATTGCACACTTACC	GGCCTAACCCAACACATGTCC	1	5.35894	187	1	5.75634	187	1	4.92029	187
210	RM10319	TCTAACACAGAACTCCCGAAGATCC	CGATCAGGAGCGTTACATATTTGG	1	5.36286	382	1	5.76025	392	1	4.9242	380
211	RM10327	ACTTCTGTTGTCCCACTGACAGG	GAGAGGTCGTCGAGGAACAGC	1	5.44178	328	1	5.8413	328	1	5.00108	297
212	RGNMS404	TAATCTTAATCTGCATCGTGTAAT	CTTTCGAGATGGGATAATGAAA	1	5.50828	206	1	5.90803	206	1	5.06841	206
213	AUT10336	TGCCACAGTGGAGAGAGAAAGG	CAGTGCTTGCTGTGTGTAGTATGC	1	5.56647	170	1	5.96672	170	1	5.12542	170
214	RGNMS457	CCGGCTGATCTATAGTTAGTTAAT	TATATCGTAATTGCTAAACCATGT	1	5.68503	305	1	6.09756	303	1	5.24273	307
215	RM10341	GCACATTGAGAGTTTGAGATGC	TGATCCATACCACTTCACAACC	1	5.69225	117	1	6.10306	116	1	5.24993	121
216	RM10342	CAGGTAGGCACTCCATCTACAAGC	CGGAGATCCACTGAATGTGTATAAGC	1	5.69317	380	1	6.10396	375	1	5.25085	351
217	RGNMS3b	ACAAAGCCGTCTTGTTTCAGGT	TAATAGATACATAACCACCCACTG	1	5.69882	150	1	6.10987	150	1	5.25656	150
218	AUT10343	GACGTGTGTGTTCCAACAGTGG	GCGGCTAGTCATCTGTCCTTACC	1	5.70235	169	1	6.11346	169	1	5.26013	169
219	RM10344	GAACAATAAGGCCGGCTAAGAGC	TTTCAGCCGTTTCTTGTGTCTAGC	1	5.77989	358	1	6.21366	328	1	5.34072	334
220	RGP081	GCGGTCTGCCTAGCTTGTCTCCTTG	AACCAAGGGCCAAAATGCTCCTCTC	1	5.78824	251	1	6.22198	251	1	5.34896	251
221	AUT10345	GGTCTGCCTAGCTTGTCTCCTTGC	CAGCTACTGCTGCACCGTCTGC	1	5.78824	86	1	6.22198	86	1	5.34896	86
222	RM8081	GGTCTGCCTAGCTTGTCTCCTTGC	CAGCTACTGCTGCACCGTCTGC	1	5.78824	86	1	6.22198	86	1	5.34896	86
223	RM10346	GCTTGATCTGCCCTTGTTTCTTGG	AACTCGAGCGGCCTTCTCAGC	1	5.80124	292	1	6.23493	362	1	5.36187	266
224	RM10347	CAGACGAAGCTTAGCGAAACAACC	GCTGACAGCACCAGCTCTTCG	1	5.81783	273	1	6.2487	273	1	5.37462	267
225	RGNMS483b	AGAACCCGTCCACGTCCATCTC	AGACGAAGCTTAGCGAAACAAC	1	5.81811	298	1	6.24897	298	1	5.37489	292
226	RM10350	GGTTGCAGGGTGGAAGTGATCC	CATCAGCAACGTGCCTTTCACC	1	5.85613	221	1	6.29234	212	1	5.41083	221
227	RM10351	TGTAGGTGAAACCGAAGGAGTGG	CCTCTCAAGCTTCGGCTATCTGC	1	5.87653	189	1	6.32391	189	1	5.43802	189
228	RGNMS10	GAGGTGCTAATAGCTGGTAGAG	AGCTCAACTCCTACACTACAGAA	1	5.93283	121	1	6.37741	121	1	5.49357	121
229	RM10353	GGACACTTTGAATGAAGGCAACC	TTGTTAGTTGGCGAAAGGAAGC	1	5.94127	178	1	6.38587	170	1	5.50202	147
230	HvSSR01-10	TACTTTCTGTCTCCCTCCATT	TTTAGATGACTCGTTAGGTTCT	1	5.94199	358	1	6.38658	382	1	5.50271	359
231	RGNMS11	AGGTTAACTACCCTCTTAATTGAT	TTAAATACGACAGCTACTCTTGTC	1	6.01016	306	1	6.45474	306	1	5.56771	332
232	RM10355	GGACCCATATGCTTCATGTCACC	CTCACGTTCTCCTTCACCAAAGC	1	6.01375	397	1	6.45808	401	1	5.571	375
233	RM10356	GCTGCTCCTATCCATGTTCTTGC	GGCGCCTCAGTGAATTATTTGC	1	6.01996	384	1	6.46429	384	1	5.57742	383
234	AUT10357	CAGGGAAGTAGAGAAGAATCAGG	CAAATCTACCACCAGCAAAGC	1	6.09388	383	1	6.53574	384	1	5.64806	383
235	AUT10360	AGCAACTGTGGAAGGAGCAGAACTCC	GATGGACTCCAGCACTACCGAAACC	1	6.15304	96	1	6.59605	96	1	5.70832	88
236	AUT10361	CCTTGATCGGAAGTAGCTCAACG	GCCCTCAGAGCAGTAAGGAGAGG	1	6.15499	138	1	6.598	132	1	5.71026	138
237	AUT10362	GCTATAGACGCCTCCTCCTTATCC	AAAGCTAGCTAGGACCGACATGC	1	6.15593	195	1	6.59894	217	1	5.7112	185
238	RGNMS467b	AACACAAAGCAAACGTCCATCT	CTCTTTCTTGGCTTCTCACCGT	1	6.17214	205	1	6.60988	205	1	5.72182	204
239	AUT10363	CGCTTCTTGTTGGTGACGTTCC	TGCTGCTCCACCACCTCCTACC	1	6.18497	184	1	6.61891	181	1	5.73226	184
240	AUT10367	AGAGCAGAAGTGAGCAATCATGG	CACCTATCATCACTGGGCATGG	1	6.21989	293	1	6.65123	267	1	5.76063	261
241	RM10368	CAGCAGCAGAAGAGATCGATGG	GAGGAGCAAAGTTTGGAGGTAGC	1	6.22096	99	1	6.65228	99	1	5.76167	99
242	RGNMS12	TAGCACAAGTGCACTACTACTGAT	GAACCTACATCGATCAACTACAC	1	6.22102	240	1	6.65234	240	1	5.76173	240
243	RM10373	CACGACGTCGCTGTACACATGG	CCTCCTCCTCATCAGGCATATCG	1	6.23518	95	1	6.68312	95	1	5.77583	95
244	AUT10375	TGCTGTTACTGTCTGGTTCAGTGG	TGGTGCAAGCTAAGTTGGATACG	1	6.27329	380	1	6.72081	350	1	5.8142	356
245	RM10376	TTAGTTTAACCGCACCGTACACC	GGTCGTTGAATTGGTGTCAAGC	1	6.27743	185	1	6.72492	179	1	5.81834	177
246	RM10377	GACACCAATTCAACGACCTCTCG	AAGATGGCCGCGTACTTCTGC	1	6.2776	153	1	6.72508	145	1	5.8185	145
247	RM10382	AGGTAGGTCCGTTGGATTGAGC	CCAGCAGGGCTTTGTTAGCTAGG	1	6.46499	381	1	6.92215	397	1	6.00914	349
248	RM10383	CTACACCTCATGTGGGTGTTTCC	CAGTCATCAGCAACATTTGTGTCC	1	6.47579	339	1	6.93299	299	1	6.01965	333
249	RM10384	CTACACCTCATGTGGGTGTTTCC	CAGTCATCAGCAACATTTGTGTCC	1	6.47579	339	1	6.93299	299	1	6.01965	333
250	RM10386	CCTTCCAAGTATAAGGGTAAGAGG	CCAAGTGACTTCGTAAGATTGG	1	6.51673	215	1	6.98988	275	1	6.0552	191
251	RM10387	GGGAAATCAAAGGCCATAAAGACC	CGGCTATGTTAAGCTAGATGTTCTCG	1	6.52195	194	1	6.99515	200	1	6.06046	196
252	RGNMS47	CTCATATGTTAATTAGTGACCACC	AAATTTCTTTCTTTCAAATTGCT	1	6.53464	164	1	7.00785	164	1	6.07316	164
253	RGNMS48b	ATATCAAACGATCCATCTTGAA	GGAAGAAGGACGGGAGGACGTA	1	6.54091	319	1	7.01681	319	1	6.07945	319
254	RM10390	GCAACGTTACGTCTTGGCATGG	CCTCTCGCGTCTCTCTCAACG	1	6.5808	89	1	7.04214	89	1	6.10508	87
255	RM10393	GGCAGAGAAGATCGAATATGATGG	TAGCTACGCGCGTTCTTCATAGC	1	6.59979	284	1	7.06083	308	1	6.12405	284
256	RGNMS58	GTATGAACATACCTTGGAGATGTA	GATGGTGTAGGAGTAACTCTGTAA	1	6.62623	284	1	7.08718	284	1	6.15122	284
257	RM10394	CAGCAGCAGCGAGATTAACAGC	GTCGTCTCTTGCTCTGTTCTTGG	1	6.62915	175	1	7.09009	175	1	6.15411	171
258	RM10395	GCAAGATTCAGTTCAGGTTTGC	ATGTGCCCTTTCGTTGTACTCC	1	6.63958	288	1	7.01093	242	1	6.16457	246
259	RM10397	ATGTCGAGCGGTGGTTGTATAGTTCG	ACCGTGATTTGGTTGTGTTTCAGC	1	6.64638	319	1	7.10908	293	1	6.17133	311
260	RM10398	TCTCCTTGCTCTACTGCCTTTGG	TTCTGCAACTTGCCAAGAAGACC	1	6.6725	136	1	7.15123	122	1	6.1974	122
261	RM10400	CTCTCTCCTGATGGTAAACTCTCC	ATATAGAGGTGCCTTGTGTGAAGG	1	6.67376	481	1	7.11567	463	1	6.19863	467
262	RM10401	ACACACTCACACCCATCCATCC	TGATCTGCACACTGCAAACACC	1	6.67597	276	1	7.15464	278	1	6.20082	272
263	RM10402	TGGATTGAAGGGAGCTCTACACC	TTGCTCCACACGATCTACACAGC	1	6.69226	286	1	7.12724	302	1	6.21711	274
264	RM10403	CATATACATCACAGCCGCTTGTAGG	AGCGAGATGGAAGGCAAGAGC	1	6.70326	406	1	7.18537	404	1	6.22818	404
265	RM10404	CTGGAGTGGTTTCTCTCCTCTGC	TACTCTGCTCGCGTAACTTCTCC	1	6.70939	311	1	7.1915	313	1	6.23431	304
266	RM10405	GCCCACATGACAGTCACAGACC	TAGCAGCAGCTCACGTGTTCACC	1	6.80905	708	1	7.27115	618	1	6.30612	652
267	RM10406	GAGAATAACTTACGGGTCATAGGC	ACTGAAGAGCTAAATCCAGTGC	1	6.82229	246	1	7.28805	246	1	6.31927	260
268	RM10408	CGTCCACCTCTCCTCTCCTTCC	CTCCCGATCAAATTCAACACACC	1	6.83589	385	1	7.30124	379	1	6.3324	367
269	RM10412	GCAGTTTGGTGACCTTGATTTGC	AACGGCCTCGACATCATATAACC	1	6.91411	192	1	7.38316	164	1	6.4104	196
270	RM10414	AACCAATTCTACCAGCACTACC	TCTGAGTCTGTGATATGCAAGC	1	6.97483	294	1	7.4303	290	1	6.46023	294
271	AUT10415	GACTCGTTCAAGACGTGGTCAGG	ACTCTCGGCATCGACGAGTACG	1	6.99071	199	1	7.44615	211	1	6.47621	199
272	AUT10416	ATACGTGAACCATGCATCAGAGC	CATATGTAGCAGTAGGCCGAGAGG	1	6.99626	176	1	7.45992	167	1	6.48172	179
273	RM10417	TGTACGCATACACACGCAATACG	GGCCTATCCTCCCTATCGAACG	1	6.99729	390	1	7.46094	358	1	6.48275	378
274	RGNMS61	ACGTCGCGTCGCCAGTAGACTC	AAAGAACGAGTCGAAGACTACC	1	7.03709	213	1	7.50676	213	1	6.52288	213
275	RM10423	ATTTGTGTGACTGCGTTGATGC	TGAGACGACGAAGGAAGTAATAGGC	1	7.05525	258	1	7.52756	254	1	6.54161	259
276	RM10425	GTACTTACGCGGCCACCAAACG	CCTCCTCATTCCACCGTCACC	1	7.06036	189	1	7.53275	201	1	6.54683	192
277	RM10427	TCCTCATCGCTTACTCCAACACC	AGTCGTCGAACACCTTCCTCAGC	1	7.07111	116	1	7.55883	113	1	6.56488	113
278	AUT10430	CGAACTTCCTCCGGTATATGTGG	TCACAAGGCCATGATTCTTTCG	1	7.07584	185	1	7.59333	179	1	6.56955	179
279	RM10432	GGTACGTGTGCTCCTCTTGATCC	CCATCTAGCACTAGCATTCATTCACC	1	7.12849	197	1	7.64205	197	1	6.62063	196
280	RM10434	AGCCACCTGTGGTTAGGGTTAGG	AGATCGAATCAGATGCCAACACC	1	7.14905	151	1	7.66301	139	1	6.64089	151
281	RM10435	GGTGGCCGCATTCCTACATTGC	TGGTAGCCAGGGAAGAGGTGTTGC	1	7.15448	96	1	7.66836	107	1	6.64631	108
282	RGNMS241	GTCTTAGCTTCATCGAATCCAC	GGATATATCACAGAAGACAATCAA	1	7.15699	1018	1	7.67088	1019	1	6.64883	1016
283	AUT10436	GCTACGTACGAGCCCTAGTTACCG	TACCGCGCCACATATACACAACC	1	7.15754	188	1	7.67143	188	1	6.64938	186
284	RM10437	TACTCAGCGCAGAAGATCAATGC	TATCATGCTCAGCTGGAGAAACC	1	7.16099	396	1	7.67488	400	1	6.65282	398
285	RM10438	CGGATCTTCTGAGGTTCCTGTGC	AGTCCAACAACACGGCATCATCC	1	7.16707	369	1	7.68097	382	1	6.65955	405
286	AUT10439	GTACGTCGTGATCTCGTGCATCC	ACACCGTCCATTACCAATCTTGC	1	7.17842	169	1	7.69231	165	1	6.67158	165
287	RM10440	ATCAGGGAGAGAACCCTCATCG	GTGAAGTGCTCGTCAGACATGG	1	7.18238	589	1	7.71499	589	1	6.67555	589
288	RGNMS137	CTACTGCTACACGTTCATCTTC	TGCAATAGTACATATTTATGAGCA	1	7.21582	297	1	7.75409	300	1	6.70953	297
289	RM10441	TCGAAGATGAACGTGTAGCAGTAGGC	ACGACGACCTGAGGAGCAGAGG	1	7.21582	195	1	7.75409	183	1	6.70953	195
290	RM10443	CTCGTTGTGTTGTTGTTGTTGC	CCAGATTCCTCTCCAAACATGC	1	7.22402	224	1	7.76223	234	1	6.71761	228
291	RGP077	TGTAAAGTTGTCAAGGGACTACTC	GGGGTATAGTAGACAACATCAAAA	1	7.24285	113	1	7.78111	140	1	6.73774	119
292	AUT10445	GGGACTACTCGAGCAAGCTAATGC	GTCCAATCTAATCGACCTCCAAGAGC	1	7.24287	369	1	7.78113	396	1	6.73775	375
293	RM8077	GGGACTACTCGAGCAAGCTAATGC	GTCCAATCTAATCGACCTCCAAGAGC	1	7.24287	369	1	7.78113	396	1	6.73775	375
294	AUT10446	TTCGTATCCTGATACCGTTACGC	GGCCTTGATGAACTTGATTTCG	1	7.24606	179	1	7.78447	177	1	6.74008	157
295	RM8098	GATACCGTTACGCCTATTCAGTAGTGGG	CTTGATGAACTTGATTTCGTTGCAGTACA	1	7.24606	179	1	7.78447	177	1	6.74009	144
296	RM8098	TTCGTATCCTGATACCGTTACGC	GGCCTTGATGAACTTGATTTCG	1	7.24606	179	1	7.78447	177	1	6.74009	144
297	AUT10448	CTGCGAAGTAGGTGCCCTTTGC	TCCTTCAAACTCATCACCCATTCG	1	7.24925	163	1	7.78765	160	1	6.74324	157
298	RM10451	CGAAGGTGTAGACGCCCATGACG	ATCTCCACTCGCCTCGCAAGC	1	7.27914	92	1	7.81696	89	1	6.77264	86
299	AUT10452	CACCGACTCCCACTATGTCTGC	AGCTCCCAACTGACAAACTCTGG	1	7.28096	299	1	7.81878	267	1	6.77445	287
300	AUT10453	CACCGACTCCCACTATGTCTGC	AGCTCCCAACTGACAAACTCTGG	1	7.28096	299	1	7.81878	267	1	6.77445	287
301	RM8078	CAATCTTTTCCTCCTCCGTAGGT	ACCTAGCAAGACGACAATGAATCAG	1	7.28106	158	1	7.81888	126	1	6.77455	146
302	RM10454	AGTGATGAGAAGCGAGAACTGAAGG	GAGGGAGTACATGTTGATGTCATGG	1	7.28357	210	1	7.82133	176	1	6.777	180
303	AUT10455	AGCCGAGCAGGCAGGCTAAACC	CAAGCCAACATGGGTGGTGTGG	1	7.28692	91	1	7.8247	85	1	6.78035	91
304	RM10456	CGGAGAGGCAGTGGTAGATCG	CTTCTTTGAGGAGGACTGGAAGG	1	7.30814	283	1	7.84567	283	1	6.80092	283
305	AUT10457	TACCACCTACCACCACGATGACG	GTAGACGACTAGCTCGCCCATCC	1	7.30851	173	1	7.84603	173	1	6.80129	176
306	RGNMS113	CACTAGAAGCTTCCATCCACCC	GATCGGAGACGGCGAAACCCTA	1	7.33278	173	1	7.87021	173	1	6.82669	174
307	RGNMS152	GATGGGTATGTTCAGAATGTAG	TGTTATTAACGTAGCAAGCTTTAC	1	7.33776	373	1	7.87519	371	1	6.83168	373
308	AUT10458	CACGGTGAGATAGAGACGAGATGG	CAATCACAAATTCACGCAGTGACC	1	7.34787	90	1	7.9222	100	1	6.84167	614
309	RM10459	TTTGAGCCCTCACTCTCTGTCC	GCTTGATCCTAATCACGCTCTGC	1	7.36151	245	1	7.93585	203	1	6.85581	191
310	RM10460	ACGATCGATTGAAGAAGCAGAGC	GCTGCATGTGTACCAAATCATGG	1	7.36171	168	1	7.93601	160	1	6.85597	160
311	RM10461	ATATCTGGCTCAGTTTGCTTGC	CATTGGACTTCAAAGCTACTGG	1	7.36178	255	1	7.93608	287	1	6.85603	335
312	RGNMS153	CACACTACTCTCTCTCAGTCTCTG	TGGATAATATACACAAGCTCCTTA	1	7.36303	256	1	7.93737	262	1	6.85736	256
313	AUT10464	TACACGAAGGCTTGTCCAATACG	GCTTTCAATGCCTTCTCTCTTCTCC	1	7.40796	148	1	8.04194	127	1	6.90336	128
314	RGNMS147	CTCTCTCTCTCGCCGAAGTGGT	TTTAGTTGCAGTCGGTGGAGAC	1	7.40855	121	1	8.04251	121	1	6.90393	118
315	RM10466	GGTGATCCTGCTTGACATCTGG	AGTCACTCACCACGAAGGTTTCC	1	7.42101	114	1	8.05765	114	1	6.91648	114
316	RM10467	TCCACAACCAACTCCACAGACG	GTCTCACCCACCTTGGGAAGC	1	7.42915	80	1	8.06938	80	1	6.9251	80
317	RM10468	GCGAGGCGAGAACGAATACTACC	GCACACCCTCATCAGTTCATCTACC	1	7.44201	234	1	8.08223	216	1	6.9379	228
318	AUT10469	GAAGTGCTCCCTAAACTTGTTGC	TTATGGAGGATGGATTCGAAGG	1	7.44562	292	1	8.08607	288	1	6.9415	297
319	RM259	TGGAGTTTGAGAGGAGGG	CTTGTTGCATGGTGCCATGT	1	7.44664	171	1	8.08657	172	1	6.9415	176
320	RM10471	GACCGATCGTGAGCTAGGTAGGG	CTCGCTCTCGCACAAATCAATCC	1	7.47567	182	1	8.11408	180	1	6.97141	177
321	AUT10473	ATCTAATTCCAGTGGCGCAGAGG	TGGAGCTAAGTGAGAGCTAGTGATGG	1	7.51605	225	1	8.14635	229	1	7.01239	241
322	RGP143	CTCATCGCCACCGGCAAGAAGA	CATCACGGTGGTGGTCGGCTTC	1	7.51641	107	1	8.14671	110	1	7.01275	110
323	RM10476	TCCATTCTCTCCTCCTCCTCTCC	CCAAGAACCTCACTTCACTCAGACC	1	7.57025	166	1	8.19823	166	1	7.06891	163
324	AUT10477	AGGTTCTTGGGTGGAAGCGAAGG	GACGATGGGTCAACCTCCATCC	1	7.57041	91	1	8.19839	83	1	7.06906	85
325	RM10481	TGGAGAGAAGACAGAGCATATACTGG	CAGGGATGGAGCATTGGTAGG	1	7.66251	178	1	8.30102	168	1	7.15908	168
326	RGNMS168b	GTCTCTTCGACTTTATATGAGAGG	ATCAATCGATAAACACATACACTC	1	7.66679	257	1	8.3053	257	1	7.16336	257
327	RM10483	CATCATCGCAAATTCACCCTAGC	GCTGAACCAGATGGGTATATCAGC	1	7.67272	181	1	8.31126	185	1	7.16928	191
328	RGNMS168c	ACATGTCTAATCATCCACCAAAC	AGCTATTACACAGGTTACTCATCA	1	7.68457	234	1	8.3232	234	1	7.18115	234
329	RM10485	CGTCTTTCTCCTCCGGCAACG	AGGAGCCAAGGAAGACGTGAAGG	1	7.69193	148	1	8.33266	142	1	7.18852	133
330	RM10487	CCCATGTGATCGGAATATACGC	CGCCATGCTTTCTAACATCATCC	1	7.73523	267	1	8.39982	265	1	7.23402	260
331	RM10495	GTCGCAGTGGATTCTAGGGTTCG	CGTGTCTCCTCTCCTCCTCATGC	1	7.8995	112	1	8.55675	121	1	7.37329	109
332	RM10496	TTCTCTCCAATTCTTCGCAAGC	AGATGGAGAGGTGAGGGTTTCG	1	7.90234	480	1	8.56063	1036	1	7.3757	464
333	RM10503	GCAGCCTTTGTAGTTTGAACATCG	GATCCTCTCAGCTCCCGAAACC	1	7.94593	150	1	8.60325	682	1	7.41596	150
334	RM10505	CCGCCGATATCTGTTCATCTACC	TTCTGAAACACCAACCCAGATCC	1	7.97377	88	1	8.63768	88	1	7.42869	88
335	RM10510	CTCTTGCTGCTCCGAACTTCC	CAGCCCATTTCCAGTTCATCC	1	8.03408	98	1	8.70542	98	1	7.4758	98
336	RM10511	CTCTTGCTGCTCCGAACTTCC	CAGCCCATTTCCAGTTCATCC	1	8.03408	98	1	8.70542	98	1	7.4758	98
337	RM10513	CTAGCTGCTTTGCTTGTCGCTTGG	GCTCGAGAGTTGCCAACCAATCC	1	8.07249	81	1	8.75745	93	1	7.51412	96
338	AUT10514	GTAGCCATAGCCTTTCCCAAAGC	TCTCCTGCAGCTGATTTCTTGG	1	8.07412	272	1	8.75909	256	1	7.51551	246
339	RM5496	GTAGCCATAGCCTTTCCCAAAGC	TCTCCTGCAGCTGATTTCTTGG	1	8.07412	272	1	8.75909	256	1	7.51551	246
340	RM10516	CCTGTATTGACTGTGTTCCACATCG	ACCATCACTTCTTCTACGTCTCACG	1	8.08636	187	1	8.79266	103	1	7.52773	489
341	RM10517	CCTGTATTGACTGTGTTCCACATCG	ACCATCACTTCTTCTACGTCTCACG	1	8.08636	187	1	8.79266	103	1	7.52773	489
342	RM10518	CACTTTACAGACAGGGCGTTTGC	CCTGTTGGATTGGTCACTTAGTTAGG	1	8.13024	295	1	8.85619	303	1	7.55962	1154
343	AUT10520	GCAGTAATATGTGGAGGTTTCG	GTAGGTCAAAGCCTTCTATCAGC	1	8.13845	625	1	8.86355	803	1	7.56792	824
344	AUT10521	GCAGTAATATGTGGAGGTTTCG	GTAGGTCAAAGCCTTCTATCAGC	1	8.13845	625	1	8.86355	803	1	7.56792	824
345	RM576	ggacggcgagttcataaatag	cttgatgggataaaagcatcag	1	8.13864	240	1	8.86373	419	1	7.56834	203
346	RM10522	TCTCTGATGGATGTGTAGGAACG	GTACTACGACTGCAAGAGGAAGC	1	8.15205	387	1	8.8773	387	1	7.59877	387
347	RM10523	GGAGATGGAGCTCGTCCACAAGG	TTCAGAAACCTCATCCCTGACACG	1	8.15922	194	1	8.88448	197	1	7.60595	194
348	RM10524	GACATTTGAATGGGTGACATGC	TTAGGTCGACGAGGAGATGAAGG	1	8.17491	189	1	8.89476	185	1	7.61617	192
349	RM10527	AGGTCTCTCATGGCTTCTTGG	ATCGAGCTAGAGATGGAGAAGTCG	1	8.30509	384	1	9.11889	381	1	7.7356	384
350	AUT10529	GTTGCGGTTTGTTCGTTCTTGC	TAGATCCCAGCAGACGGATCAGC	1	8.32891	174	1	9.14238	138	1	7.76959	162
351	RM583	AGATCCATCCCTGTGGAGAG	GCGAACTCGCGTTGTAATC	1	8.33003	192	1	9.14245	156	1	7.76968	180
352	AUT10531	GTCCACAGATACGCAGGTACACG	CATCATCAGCAGGTCAGTTTGG	1	8.36104	75	1	9.1928	63	1	7.80168	75
353	RM8140	CCAAAAGTATAGCTCACACCTCA	GTTGTACCGAGGTCGTAGGTTT	1	8.38837	114	1	9.22018	119	1	7.82895	114
354	RGNMS132	CTCTCTTTCCTCTCTCCTACCT	GGGTTAAGTTTAGCCAAATCGG	1	8.40329	228	1	9.2284	228	1	7.84563	228
355	RM10534	AGTCGAGAGTGAACTTGGTTGGTTGG	AGCATCTGCAGCACCCAGTTCC	1	8.40343	450	1	9.22854	450	1	7.84577	447
356	AUT10535	AGATATACACGGCAATCCGATCC	GTAGGGTTTGAAAGCTTGAAGTGC	1	8.4101	286	1	9.24775	296	1	7.85244	265
357	RGNMS166	ACTAAAGTTTCTCTCTCCTCTCCT	CCCGCCGAATTCTAGGGTTTCC	1	8.42918	137	1	9.26688	139	1	7.87151	137
358	RM10536	AAATCGGGTGGATATTCGTGAGC	TCGTCTCATCTCATCTCGTCTCG	1	8.42938	173	1	9.26707	169	1	7.87171	173
359	AUT10538	TTCCGAGTGGTTATGCAAATGG	TCGTGACCTGAGAAATTGTGTCC	1	8.45157	195	1	9.28507	181	1	7.89412	165
360	RM8147	TTCCGAGTGGTTATGCAAATGG	TCGTGACCTGAGAAATTGTGTCC	1	8.45157	195	1	9.28507	181	1	7.89412	165
361	RM10542	TGGGAGAGTACTCATCAAAGC	TTCTGCTCTAGTAGCATACTGTCG	1	8.52109	415	1	9.34887	291	1	7.96883	555
362	AUT10543	GTAACAGCGACCGTTGGTTGG	CCCATCATCTGATGTCACACTCC	1	8.57704	182	1	9.42975	180	1	8.02214	180
363	RGNMS291	ATTCCTATCCATCCTCCTTCAG	CAGGAGATTTCATTCCGCATAG	1	8.68203	137	1	9.52506	137	1	8.1026	137
364	RM10551	AGCTTCTCCTCCTCCTCTTCTCG	CGCCAATCTCAAATCGAAATCC	1	8.69848	140	1	9.54188	123	1	8.11905	140
365	RM10553	GTAGACGGCGTTGTCGTACTTGG	ATCATCGAAACGAAAGCGAAGC	1	8.70724	393	1	9.55	393	1	8.12745	393
366	RM8093	TCATGGTTTGTCATGGAATGTTATTATTCA	AACAAATAGCATGCACACATGATACTGATG	1	8.77247	155	1	9.63019	1461	1	8.19244	129
367	RM10568	ACGACGTGGAGGAAGGAAGAGG	GGACGAACACCTTTGATCACATCC	1	8.90058	371	1	9.73557	371	1	8.27956	371
368	AUT10569	GGGATACGAATCCAAGTTTGATGACC	TTTGCCTCATAGTAGGCCCACACC	1	8.91573	361	1	9.75072	305	1	8.29467	313
369	RM8083	GATGTGCAAATTATCATGTGTTTTGTGAGG	ATAGTAGGCCCACACCTGACAGGTTGTA	1	8.91594	153	1	9.75092	97	1	8.29487	105
370	RM10572	CATACCAACCGGCTTTGCTTCG	GTTTCGACAGGACACGAGGAAGG	1	8.95603	193	1	9.8142	193	1	8.3358	197
371	RM10574	TGATACACAGATCGGCAGAAAGG	GCAACAGAGTACTACCTGACGAAACC	1	8.98526	258	1	9.83981	258	1	8.36283	270
372	RM10575	CAGCCTCACGGGACATCATCC	CACAGCCGTCGAAACCCTAGC	1	9.06546	273	1	9.93128	273	1	8.43616	271
373	RM10578	GCGAGTAATTATGGTGGTGTTTGG	CCCTCGACCATTCGTATAGTTACTCC	1	9.18734	291	1	10.0999	287	1	8.56293	244
374	AUT10580	TGCTGCTGCTGCTTTACATTGC	CACCTCCTCGAACGAGAACTCC	1	9.19108	187	1	10.1037	187	1	8.5666	190
375	RGNMS383	ACGCCTCATCTGACTCTTCTTC	GTCAACTTGGACGGGAGGCAGG	1	9.25816	164	1	10.1774	164	1	8.63187	160
376	RGNMS384	GTTGTTGGACGATGGTGAGGTC	CTACTGCTAAGTGCTACTAACTGA	1	9.29226	334	1	10.2161	334	1	8.66623	334
377	AUT10585	TGTTCTTGTGGCTGAACTCTTGC	GGCACTTCACGTAGCAAACTAGC	1	9.31744	141	1	10.2413	143	1	8.69142	135
378	RM8133	AAAACTGACTGTTTGTTTAAATGAAAT	GTTACTGCTGTAATGTGAATTGCT	1	9.39025	151	1	10.33	169	1	8.76086	140
379	RM10590	GAGGGTATGTACTCTCGTTGTTGC	TTTGCTATAGTAGTGCAGCAGTGG	1	9.40418	447	1	10.3463	431	1	8.7748	402
380	AUT10591	ACCGGCGGTCCTAATAACTATGG	GGTCCGATTAGATGAGAATCAGTTGG	1	9.43578	291	1	10.3823	404	1	8.80505	230
381	RM8131	GGTCCTAATAACTATGGTTGTCGCTA	TGCTAAGTGATGAGAATCAGTTGATATT	1	9.43579	138	1	10.3823	97	1	8.80506	102
382	AUT10594	CCTGTTAGGTGGCACATTTATGG	TCGGCCCTGTATATCATTACTCG	1	9.46355	295	1	10.409	313	1	8.83562	703
383	AUT10595	GGACAAGAGGTTCCTCAATCTCG	AAACGGGATTATCGCCACTACC	1	9.48555	198	1	10.431	188	1	8.85806	189
384	RM10596	CAACAACCTGGCAGAGAATTTCG	CTGCACGTGATGTCAGAGTTCG	1	9.4898	263	1	10.4352	213	1	8.8623	215
385	RGNMS182	CTAAGGTTAGAGTTAGCCAAGAAC	TGTTCATACAGAGGAGAGAGATAA	1	9.56691	283	1	10.4962	290	1	8.92724	283
386	RGNMS193	CTAAGGTTAGAGTTAGCCAAGAAC	TGTTCATACAGAGGAGAGAGATAA	1	9.56691	283	1	10.4962	290	1	8.92724	283
387	AUT10602	ATTGATCGAGCAGAGACACAACG	ATTCAACAATGGCTGCGGTAGG	1	9.59419	116	1	10.5167	104	1	8.94801	113
388	AUT10604	GAAATGGACTCGCTCCTAAACTGG	ACGAACTAGAGCATGGGCACTCC	1	9.60562	263	1	10.5281	248	1	8.95964	239
389	RM8070	GAAATGGACTCGCTCCTAAACTGG	ACGAACTAGAGCATGGGCACTCC	1	9.60562	263	1	10.5281	248	1	8.95964	239
390	RM580	GATGAACTCGAATTTGCATCC	CACTCCCATGTTTGGCTCC	1	9.60667	221	1	10.5281	206	1	8.95965	197
391	RM10605	CTTCGTCGCAGCCCAAGAGAGG	GGCAGTACGGGCACTTGATCTCC	1	9.68977	191	1	10.6273	182	1	9.04313	191
392	RGNMS395	TTATTTATTTATTTAACCCTTCCC	CTCCTCGCTCTCGCTGGATCTC	1	9.69871	146	1	10.6362	145	1	9.05211	146
393	RGNMS286	GTTCCCTTTCCAATTTCACCTC	GTGGTTTCCTCTTTCTTCTTCT	1	9.69874	106	1	10.6363	109	1	9.05214	109
394	RM10607	CAAATCAAGAACCGCATCAAGC	CCTGCTACACTTCCCGTTTCC	1	9.70834	280	1	10.646	279	1	9.06174	280
395	AUT10608	TCTCCCTCTACTCCGGCCATCC	CTTCCTCGTCCACGGTTTGTACG	1	9.71094	266	1	10.6486	260	1	9.06436	260
396	AUT10609	AAGAGGTTGCCCTTTCTCCATCTCC	GGGAGGAGCAACGCAATTATGC	1	9.72576	602	1	10.6636	500	1	9.08032	1381
397	RGNMS200a	TTTGGTGTGTATACGAGTAAATTC	ACATCAAACAATTTATATTTCCTT	1	9.73751	122	1	10.6752	122	1	9.09235	122
398	RM10618	CCAAATCGTCGCCAGAGAATCC	TTCTCTCTGCCTCGACAGCAAGC	1	9.81587	314	1	10.7551	317	1	9.16915	326
399	AUT10619	ATCCAAGCTCCTGAAATGCATCC	TGGTACATGCCCATATCAAGAAGC	1	9.82713	293	1	10.7664	266	1	9.18106	275
400	RM8053	TCTAAAAGAGACATTGCCGATGATA	CATACTCAAAGTCACGGAAAGTACC	1	9.82726	234	1	10.7665	208	1	9.18119	216
401	RM10620	CGGAGGTTTCCTAACAGTGTGG	ATTGATGTGCCCATCCTACATCC	1	9.83108	575	1	10.7703	583	1	9.185	421
402	RM10621	CGGAGGTTTCCTAACAGTGTGG	ATTGATGTGCCCATCCTACATCC	1	9.83108	575	1	10.7703	583	1	9.185	421
403	AUT10622	CGCGGTTAATGTCATCTGATTGG	CCATACTTCGAGATCCAAGACTGACC	1	9.86556	167	1	10.8099	181	1	9.21898	162
404	RM8051	CGCGGTTAATGTCATCTGATTGG	CCATACTTCGAGATCCAAGACTGACC	1	9.86556	167	1	10.8099	181	1	9.21898	162
405	AUT10623	AGTACGATTTCTGTCAGCGTTGC	TGAAAGGAGTAGCCAGAGAAAGC	1	9.93859	349	1	10.887	270	1	9.29159	309
406	AUT10624	AGTACGATTTCTGTCAGCGTTGC	TGAAAGGAGTAGCCAGAGAAAGC	1	9.93859	349	1	10.887	270	1	9.29159	309
407	RM8046	AGTACGATTTCTGTCAGCGTTGCTTAGT	GGATGAAAGTTGATGGATGATCTACTTGTT	1	9.93859	194	1	10.887	115	1	9.2916	154
408	RM10628	AGAGCAAACCGCACGAATCAGC	TCCTTCGAAACCAATCCATCTCG	1	10.0143	164	1	10.9525	165	1	9.36297	167
409	RGNMS251	CTTTATTATTGTTTCGGTATGATG	ACCAGTACAAGAATCCAATACACT	1	10.1476	192	1	11.0415	188	1	9.43406	191
410	RM10634	GGATAAATTGCCACCCTAACTCG	GAGTCGAGATGGTCCAAAGTGC	1	10.152	512	1	11.046	466	1	9.43857	499
411	RM10635	GCCGAGCTAGTATTAGGCTCATAGG	TGCTCGTTGGGTACTAGTATCATTGG	1	10.1542	436	1	11.0481	408	1	9.44068	432
412	RM10637	AATGATGAGGTGAGGGTTGAAGG	CAGTCAGTGACCCAGTCAATCTCC	1	10.1878	285	1	11.0817	279	1	9.47471	285
413	RGNMS256	TACATAACTTGAAGTCCAGGAATA	AACACTCCTGTCTTACTCTTTCC	1	10.2488	276	1	11.1671	277	1	9.53198	276
414	RGNMS275	TACATAACTTGAAGTCCAGGAATA	AACACTCCTGTCTTACTCTTTCC	1	10.2488	276	1	11.1671	277	1	9.53198	276
415	RM10642	TCGACGAAGAGGACTGACACG	CAGGTAGGAGCTGCATATATGATTGG	1	10.2488	709	1	11.1672	362	1	9.53205	653
416	RM10643	CCCATACTCACCGTTGACATCC	GAGTGGGAGGACATGAGCAAGC	1	10.2511	158	1	11.1691	158	1	9.53422	158
417	RM10644	TCCGGCAAATATAGTCCAAACG	CAACGACGACGACATGTATAGGC	1	10.2929	199	1	11.227	209	1	9.58169	197
418	RM10648	CCAGCCCAAGCTCCTCTTCTGG	CAGAGGAGGGAGCAAGCGAACC	1	10.3127	158	1	11.243	158	1	9.59026	158
419	RM10649	GACCAATATGGAGTGGTCTCTTGG	ACGCTCCGCCTGCTATTTAGG	1	10.3331	444	1	11.255	411	1	9.61068	396
420	AUT10651	CTATGCCTCCGCCTCTATCTCC	CTCTCTGGACCTACCCGTCATCC	1	10.3568	151	1	11.2797	175	1	9.63432	143
421	RM10654	CGAAGGACGCGTAGGTGTAGAACC	CTCGCGCATATCACAGTCACAGC	1	10.3913	273	1	11.3789	276	1	9.66977	273
422	RM10656	GCTGAGAGCTGATTAATCGGAAGC	CGCCACTAGCTAGCACACACC	1	10.4187	190	1	11.4065	176	1	9.69685	192
423	RM10660	GATCGAACCCACGATCTCACC	CAATAGCTGCTCCACGTCACTAGG	1	10.5145	278	1	11.4628	281	1	9.77	278
424	RM10661	GTTGGTGGTCAAGACGAGACTGC	ATTGGCACCCATCACTAATCTGC	1	10.5209	521	1	11.4692	521	1	9.77639	515
425	RM10662	GATCTCAACACACATGCAAACTGG	CTAGCGTATGCAAGGAAGGATGC	1	10.5221	336	1	11.4704	320	1	9.7776	322
426	RM10664	ATCCATGACCTGATCCTGAATCC	GACTTGACCAAACCCACAAGTGC	1	10.6109	97	1	11.6091	101	1	9.8627	97
427	RM10665	CCTGCTGCAATTGATGACAAGC	TGGACAGAATGAAGCATCTGTGG	1	10.6111	372	1	11.6094	389	1	9.86297	352
428	RM10666	CCTGCTGCAATTGATGACAAGC	TGGACAGAATGAAGCATCTGTGG	1	10.6111	372	1	11.6094	389	1	9.86297	352
429	RGNMS300	GACCGATCGATATGATGAAAGT	AGTCTTTACCAATCCAAATTAAAC	1	10.713	127	1	11.701	127	1	9.95981	127
430	RM10673	TCGAAGGGTCCGACCATGAAGG	CCATGCTGCGCGACTACTACGG	1	10.714	159	1	11.702	159	1	9.96084	159
431	RM10680	CGAACTAGGGTTAGTGAGGTGAAGG	AAACCCGGAGGAGGAGGTAGC	1	10.8706	267	1	11.8196	257	1	10.0485	267
432	RM10681	CGAAGAGCAGCCACATAACAAGC	TAGAGACGGTTGGGAGTTGTTGG	1	10.8776	199	1	11.8267	199	1	10.0555	199
433	AUT10682	CCATTTGCAGTATGAACCATGC	ATCATGCAATAGCCGGTAGAGG	1	10.8874	198	1	11.8364	209	1	10.0644	198
434	RM10683	CTTTCGATCCCTTCCTTCTTTCC	GACAATAATAGGCCGAACGTAAGTGG	1	10.9176	489	1	11.8523	464	1	10.0822	781
435	RM10685	TATCGGACTCTACTGAAACACC	GTGTACTCCCTGCATTTCTAGG	1	10.955	163	1	11.8944	163	1	10.1165	163
436	RM10686	GCAACCTATAGCTAGAGAGCTACTGC	CAACTCTCAACTCCCTTACTTCTCG	1	10.9593	173	1	11.8987	122	1	10.1207	169
437	RM10694	TTTCCCTGGTTTCAAGCTTACG	AGTACGGTACCTTGATGGTAGAAAGG	1	11.0189	194	1	11.9539	198	1	10.1802	194
438	RM10695	CCTTCGACTCCATGAAACAAACG	TCTCTTTGCCCTAACCCTATGTCC	1	11.0307	294	1	11.987	255	1	10.192	677
439	RM10696	CCTTCGACTCCATGAAACAAACG	TCTCTTTGCCCTAACCCTATGTCC	1	11.0307	294	1	11.987	255	1	10.192	677
440	RM10698	TCGACATCTTGGAGAAGAAGAGG	CATCTCCACAGCATCACACACC	1	11.0349	78	1	12.048	78	1	10.1964	78
441	RM10699	TCTGACGTGACGAATGACTCAGC	GTCCTCATCCATGGGAGTTGG	1	11.0355	285	1	12.0486	285	1	10.197	285
442	RGNMS319	GAGAGTGTTGTAATGTTTGTGATT	TGATGGAGGTACAACTGTAGAAG	1	11.0474	116	1	12.0618	116	1	10.209	116
443	RM10701	GAGACACGGCACAATATACAACG	TTCTATCTCCGACCTCTTCTCAAGG	1	11.0759	69	1	12.0908	73	1	10.2374	69
444	RM10702	ACGATAAATCAAGCGGCTACTCG	CTTTCAGCAGCACCTTCTCAGG	1	11.1062	317	1	12.1231	243	1	10.2677	255
445	RM10710	GCTTCGATCGATGAGAAAGTAGAGG	GAATCTCCCATCCTTCCCTTCC	1	11.2101	172	1	12.2374	175	1	10.3638	172
446	RM10711	GCTTCGATCGATGAGAAAGTAGAGG	GAATCTCCCATCCTTCCCTTCC	1	11.2101	172	1	12.2374	175	1	10.3638	172
447	RM10712	TTGACCGATTCTAACCTGTTGACC	GAGTCGGTAGAGCTCAAGAAGTGC	1	11.2235	167	1	12.2554	700	1	10.3772	143
448	RGNMS348	TTAGGATTATGGATTTGTAGGAAA	GCCATGAAACATAAACATAAACTA	1	11.27	192	1	12.2954	192	1	10.4225	192
449	RM10713	ATGAACCCGGCGAACTGAAAGG	CTGGCTCCCTCAAGGTGATTGC	1	11.2824	144	1	12.3078	144	1	10.4349	144
450	AUT10715	GTAATCCATGCGATGGGACACG	AGCGCGCATAATCCCTACTTTGG	1	11.288	459	1	12.3134	465	1	10.4404	453
451	RGNMS111	GTACGTAACGTGAATACGTGATA	ATCGATGGAGCAAACTAATAAA	1	11.3646	200	1	12.3882	200	1	10.5052	200
452	RM10718	TAACTCGCCACCGATGATTTCG	CGACCAACGTGCAATAGTACAAGC	1	11.3914	93	1	12.4094	93	1	10.5365	95
453	RM10719	GAGGACGAAGGAGAAGGACAAGG	CGAGCCCATCTGATGTGAGACC	1	11.4041	163	1	12.4221	163	1	10.5483	163
454	RM10720	GCAAACGTCTACGTGAGAAACAAGC	GCATGTGGTGCCTTAACATTTGG	1	11.4437	204	1	12.4723	194	1	10.5871	162
455	RGNMS378b	CTAGATCTGCTTAGTTCACTGGTA	TGCTTCAACCATATATCACTTTAT	1	11.4746	308	1	12.5045	308	1	10.6178	308
456	RGNMS366	GATGAACTTAACATACTGCCATT	TAAGTTACAGTAATCTCAAACCCA	1	11.4747	370	1	12.5046	370	1	10.6179	370
457	RM10724	ACATTTCCCAGGTTTGACTACGC	TGTAAGTCTGGTCAAGCATTGAGG	1	11.4816	480	1	12.5116	478	1	10.6249	478
458	RM10725	TGAGGCTACTTACCTACGATGTGC	GTCTGACCGCACACATAACACC	1	11.505	491	1	12.5265	486	1	10.6388	495
459	RM10726	TGAGGCTACTTACCTACGATGTGC	GTCTGACCGCACACATAACACC	1	11.505	491	1	12.5265	486	1	10.6388	495
460	AUT10740	TGATGGATCTCTGAGGTGTAAAGAGC	TGCACTAATCTTTCTGCCACAGC	1	11.7267	99	1	12.5972	105	1	10.7575	97
461	RM10741	AGGTCGCCTGAGTTTCATACCC	TGTGCGGTTTAAGATAGAGTGAGC	1	11.7791	195	1	12.6751	195	1	10.8092	195
462	RM10742	GTAGGAGCTCCACGCTAGTTTCC	ACAACTTGGAAGGTACGGACAGG	1	11.818	272	1	12.7212	564	1	10.8496	276
463	RM10745	TGACGAATTGACACACCGAGTACG	ACTTCACCGTCGGCAACATGG	1	11.8581	188	1	12.7616	184	1	10.8894	184
464	RM10746	ATGACTCTTCGCCATTCCATAGC	ACCATGGTCAGCCATCACTAGG	1	11.8823	172	1	12.7856	194	1	10.9068	168
465	RM10747	TTTCACCATTTCGTCGGCATTGG	CAAACGCATCAAGCCATGAGACC	1	11.9	95	1	12.8033	73	1	10.9282	81
466	RM10749	CGATGTAGTCGATGTGGATCAGG	TATGGTCGGATCAGCGTAAGTCC	1	11.946	287	1	12.8581	215	1	10.9686	290
467	RM10750	GTACGTAAATCGGGCGCTGACG	GCTTGTGAGGCCTAATTTGAGTTGC	1	12.006	490	1	12.9259	492	1	11.0267	490
468	RM10753	AGGTGGTGGGCTGTAGCTATCC	GGGCCCACCTGTCATATATACCC	1	12.0268	181	1	12.9538	175	1	34.1009	187
469	RM10754	GCAGTAGCAGCGGTAGGAGTAGC	CCTGCTGCCTTGAATTGAACC	1	12.0416	135	1	12.9611	135	1	34.1082	135
470	RM10757	GGCGCTAGTTATGGTAGAGATTTCG	AACAAATCTAGCGGCTGTTTCC	1	12.1018	157	1	13.0291	157	1	11.0821	157
471	RM10763	AGATGTCGCCTGATCTTGCATCG	GATCGACCAGGTTGCATTAACAGC	1	12.2379	237	1	13.165	150	1	11.1945	172
472	RM10764	AGATGTCGCCTGATCTTGCATCG	GATCGACCAGGTTGCATTAACAGC	1	12.2379	237	1	13.165	150	1	11.1945	172
473	RM493	TAGCTCCAACAGGATCGACC	GTACGTAAACGCGGAAGGTG	1	12.2811	210	1	13.2169	234	1	11.2368	210
474	RM10771	AGCATCGTCTCGATGTTCACG	CGAGTAGTTGTTGTCAGTTTGTCACC	1	12.3016	121	1	13.2349	121	1	11.2578	121
475	RM10773	CCACCTATAGAAATAGGTCCATGC	TAGAACATGTCACCATCCAAGG	1	12.3047	407	1	13.2379	407	1	11.2607	366
476	RM10774	GGTCTAGCAGCTCTCCCTTCG	GCGATTTAGGAGCGTTTGTAAGG	1	12.3154	389	1	13.2655	387	1	11.2705	389
477	AUT10777	GTACGTAAACGCGGAAGGTGACG	CGACGTACGAGATGCCGATCC	1	12.4238	177	1	13.3769	201	1	11.3668	177
478	RM10778	CCTATATTACGCATGGCAACAACC	AAAGAGGTGCATATCCTTCCATGC	1	12.4333	108	1	13.3871	108	1	11.3767	104
479	AUT10780	CTTGCACAAGAGATGATGATGAGC	CATGCTGAGAAATAGTACGCTTGG	1	12.4444	299	1	13.3971	297	1	11.3869	298
480	RM140	tgcctcttccctggctcccctg	ggcatgccgaatgaaatgcatg	1	12.4445	260	1	13.3971	258	1	11.387	259
481	RGNMS391	CTGTAACGGTTTATGATTTATTTG	GACCAGTATTCATAATGCTACAAC	1	12.4742	152	1	13.4467	154	1	11.4155	152
482	RGNMS392	AAGATAAAGATGATGACCATGAG	TCCTTCATATTGAAAGAGACAGTA	1	12.5069	374	1	13.4915	378	1	11.4481	379
483	RM10782	CTACTGATATGCCCGTACCAACG	CCAAACTGGAGTAGTATTAGGTGTGG	1	12.5499	201	1	13.7014	213	1	11.4831	201
484	RM10794	TATATAGCTGAGGCGAGGCATCC	AAGATTTGGGTCGCTCCGTACC	1	12.7891	354	1	13.9201	355	1	11.6839	351
485	RM10796	ATCCTCTTCTCTGTTCTTCCACTTCC	CTTGTCCCTGCTCCATTCTCG	1	12.8324	76	1	13.9718	120	1	11.7264	78
486	RGNMS437	CTACTGATTTGTTTGTTTGCTAAG	TAATACTAAGCAGGGAGTAGCAG	1	12.8736	327	1	13.969	327	1	11.7598	327
487	RM10798	AATTGGTACGTGGTGGTACAGC	GCCTAATACTAAGCAGGGAGTAGC	1	12.8737	183	1	13.9691	183	1	11.76	183
488	RM10802	CTTCACCCTCTTCAATTTCACC	TTGTGATTCCGCTTTGAGTAGC	1	12.8775	301	1	14.0099	311	1	11.7637	301
489	RM10803	CACTTGCCTCCTCTTGCAACTCC	CATCTCCCTGTCGGACTTGTCG	1	12.8947	99	1	14.0334	96	1	11.7809	96
490	RM10807	AATGCTCTCTCCCTAGCAGCAACG	TCGGCTGCAAATATCCACAGTAGC	1	12.9968	197	1	14.1508	195	1	11.8519	195
491	RGNMS453	TAGGAACTGAGTATCTGGTCAAG	CTACAAGCATTTACCAACAATCT	1	13.0647	344	1	14.2261	344	1	11.9082	344
492	RM10810	GTCAGTCATACCTCCCTGAAGAGG	CGACAAACCTTGATGAGGAACG	1	13.0708	647	1	14.2315	689	1	11.9136	673
493	RM10812	CTGCATGTGTACGAAGAATGAACG	TAGCTGGTTTGTGCCATCTTTCC	1	13.079	165	1	14.3358	139	1	11.9279	125
494	RM10813	AACCCGCTAACAGATTCAAACG	TTGGAAATGTGCTCAACTGACG	1	13.0792	388	1	14.336	358	1	11.9281	360
495	RM10815	CCACCCGCAACTCACTAGTCC	ATCTAAAGTGACCCTGATCGAACG	1	13.2712	207	1	14.4389	207	1	12.0862	207
496	RM10819	ATGATCTCGCAATACTCGATGG	ACGGAATAGAAAGTTGGACAGC	1	13.3806	366	1	14.5502	382	1	12.195	361
497	RM10820	ACCCTAGCTAGCCACCATGAACC	GAAAGCCCTTCTTTCTCCACTCTACC	1	13.4048	263	1	14.5538	263	1	12.2192	265
498	RM10821	CACCCGCGTCTTCTCTTCTCC	CAGTCCCACAGGAACATCTTCTCTCC	1	13.429	184	1	14.5999	184	1	12.2433	184
499	RM10822	ACGCGAAAGCCCTAAATCCAAGC	ACAGTGCCGTACGGTCTTTCTGG	1	13.4342	352	1	14.607	346	1	12.2485	352
500	RM10823	ACGCGAAAGCCCTAAATCCAAGC	ACAGTGCCGTACGGTCTTTCTGG	1	13.4342	352	1	14.607	346	1	12.2485	352
501	RM10825	GGACACAAGTCCATGATCCTATCC	GTTTCCTTTCCATCCTTGTTGC	1	13.4659	97	1	14.6386	97	1	12.2802	91
502	RM10826	CCACCAAGAACCAATCAATCTACACG	CTAGCCATTCCCATGACCAACG	1	13.4663	183	1	14.639	183	1	12.2806	189
503	RM10829	TCATCCGTGGAGCAAGGAGAGG	CCTAGCTAATTGGAGTCCGGGTTGG	1	13.485	122	1	14.6681	119	1	12.3006	119
504	AUT10834	GGAGGACGGGTACATCAAGATCC	CTCGGTTCAGAGCTTGCTTCTCC	1	13.684	450	1	15.0232	448	1	12.4941	450
505	RM10835	GGCACTTTGTCTATTTCCTTCC	GGCAGTACAATCAATCCATACC	1	13.6968	395	1	15.0375	395	1	12.5068	393
506	RM10836	TGGTTGGTGATCATCATGTAGG	TGATGAACACAGTAACCGAAGAGG	1	13.7136	188	1	15.0675	188	1	12.5235	188
507	RM10837	TGCTGTCAATCTGTGCTACATGG	AAAGTGAAGGGCACAAGATAGCC	1	13.714	385	1	15.0679	385	1	12.5239	385
508	RM10838	GCAACAGAGCTAACCACCAAACC	GCCTAATGTTGCTACGGGATGG	1	13.7148	146	1	15.0686	147	1	12.5247	146
509	RGNMS468	GATCATACAGGTTTCTTGGTTTAT	TGATCAATTTATCTACGATACAGC	1	13.7154	156	1	15.0693	156	1	12.5253	156
510	RM10839	ATGCCATGAATGTAACCGAGACG	AGAGAGCAATCCATGCATCTTCC	1	13.723	206	1	15.0823	208	1	12.5329	206
511	RM10843	CACCTCTTCTGCCTCCTATCATGC	GTTTCTTCGCGAAATCGTGTGG	1	13.9373	162	1	15.2739	156	1	12.7434	164
512	RGNMS77a	TAAGGAAGAAGTAGTCTGACATGA	AATATTTATAAGATCGTCCATTCC	1	14.0689	378	1	15.3974	378	1	12.8417	378
513	RGNMS223	AACTCTAGCCCTGATTCGTGTT	AAAGTGTATAAAGACCGTACCAAT	1	14.0698	353	1	15.3983	352	1	12.8426	353
514	RGNMS216	ATGCTCTTCCAAACACCAAATC	AGAGACTCAAGAGTCACACAAGT	1	14.1773	379	1	15.5418	383	1	12.9588	382
515	RM10854	GAAACACCTCTTAGCGAACACACC	GAAGAGGGAGAGTGGAGGCTAGG	1	14.1901	471	1	15.5545	456	1	12.9718	447
516	RGNMS172	ATATTACAGGACAGGGTGAGTAAT	ATTCATTGCTAGTATCAACTCTCA	1	14.2053	331	1	15.5696	331	1	12.987	331
517	RM10861	GATCGAGGAATATGATCCAACTCG	ATTTCTGGTGTGAGCACTGATCG	1	14.3528	279	1	15.7584	209	1	12.9994	217
518	RM10864	GAGGTGAGTGAGACTTGACAGTGC	GCTCATCATCCAACCACAGTCC	1	14.3958	239	1	15.8054	211	1	13.0394	221
519	RGNMS356	ACTTTCTAATGAATTGATGATCG	CAGATTAAGTAAATTACAAGCCAA	1	14.3959	334	1	15.8055	304	1	13.0395	316
520	RGNMS435b	ACAGTACACATTAGATGGGTTGTA	GTATCAGTTAGACAGTAAGAGGCA	1	14.3997	243	1	15.8093	242	1	13.0434	243
521	RGNMS1162	TCTAATATATCTGAACCTATGCCA	CTGAATTAAATTAACAAAGAGCAT	1	14.4373	282	1	15.8376	282	1	13.0815	282
522	RGNMS271	TCTAATATATCTGAACCTATGCCA	CTGAATTAAATTAACAAAGAGCAT	1	14.4373	282	1	15.8376	282	1	13.0815	282
523	RGNMS1195	GTTCTAGTACTTTCTAGTTTGGGC	TGACAAACTTAACTTGCTACCTAC	1	14.496	233	1	15.9323	258	1	13.1385	233
524	RGNMS397	GTTCTAGTACTTTCTAGTTTGGGC	TGACAAACTTAACTTGCTACCTAC	1	14.496	233	1	15.9323	258	1	13.1385	233
525	RM10870	TGAGGCTGTAACGTAGACGATGAACC	AAGCCTGCTAGAGAGGCCCAACC	1	14.5263	234	1	15.9529	193	1	13.1669	162
526	RM10871	TGAGGCTGTAACGTAGACGATGAACC	AAGCCTGCTAGAGAGGCCCAACC	1	14.5263	234	1	15.9529	193	1	13.1669	162
527	RM10873	GTATCGATCGGAGTCGTTTGC	CCCACCTAATAAGTTCGTGTTCACC	1	14.5436	293	1	15.9702	335	1	13.1841	293
528	RGNMS243a	TTGACCGGAGCTCATTTACTAT	TTGTCTAGGCTTACCAATGTATAA	1	14.5871	358	1	16.001	358	1	13.2276	358
529	RGNMS955b	TTGACCGGAGCTCATTTACTAT	TTGTCTAGGCTTACCAATGTATAA	1	14.5871	358	1	16.001	358	1	13.2276	358
530	RM10875	TCCGCAATAAACAGCCACACG	CGTCCGGTACTTCTCCTTGAGC	1	14.59	326	1	16.0237	335	1	13.2305	326
531	RGNMS320	ATCAAATCCCAAATTAAGAATG	CCTATAATTCACCAACTCCACT	1	14.5935	326	1	16.0272	326	1	13.234	326
532	RGNMS214a	AATACTCATGTTGATCTTGATCTG	AGCCCTTTCAACCTAGTACTATAA	1	14.5937	323	1	16.0275	317	1	13.2343	317
533	RGNMS956a	AATACTCATGTTGATCTTGATCTG	AGCCCTTTCAACCTAGTACTATAA	1	14.5937	323	1	16.0275	317	1	13.2343	317
534	RM10878	GGAGGAGAACCCGAAGCTGTCC	GAAGGAGCCAATGGCGAAATCC	1	14.624	168	1	16.0628	168	1	13.2638	165
535	RM562	CACAACCCACAAACAGCAAG	CTTCCCCCAAAGTTTTAGCC	1	14.6273	244	1	16.0629	233	1	13.2702	236
536	AUT10881	CAAAGTTCGGATCATCTGTTCG	ACATATCAGGGAAAGCGTCAGG	1	14.6606	152	1	16.1176	138	1	13.2911	156
537	RM10888	AGTGAACGTTGAAAGTGACAGC	CAAGTATTCCTTCCGTATGAGC	1	14.7742	375	1	16.237	371	1	13.4126	373
538	RGNMS1375	TTCAGACAAGTTCAGTTAGATGTT	ACTTTAAATTTCAACTTCCTCATT	1	14.8798	397	1	16.3089	398	1	13.4963	397
539	RGNMS327	TTCAGACAAGTTCAGTTAGATGTT	ACTTTAAATTTCAACTTCCTCATT	1	14.8798	397	1	16.3089	398	1	13.4963	397
540	RGNMS482	TTCAGACAAGTTCAGTTAGATGTT	ACTTTAAATTTCAACTTCCTCATT	1	14.8798	397	1	16.3089	398	1	13.4963	397
541	RGNMS438	AGAGAATATGCATAAGCTTGTATT	CAAGAAGAAGAGGAAGACACTC	1	14.9032	390	1	16.3379	390	1	13.5196	390
542	RGNMS1210	CTCTCCCTCTCCCTAGCCTCTG	GTTGCGTGTTGGACACTCCCTC	1	14.942	161	1	16.3905	161	1	13.5767	161
543	RGNMS1268	CTCTCCCTCTCCCTAGCCTCTG	GTTGCGTGTTGGACACTCCCTC	1	14.942	161	1	16.3905	161	1	13.5767	161
544	RGNMS1330	CTCTCCCTCTCCCTAGCCTCTG	GTTGCGTGTTGGACACTCCCTC	1	14.942	161	1	16.3905	161	1	13.5767	161
545	RGNMS315b	CTCTCCCTCTCCCTAGCCTCTG	GTTGCGTGTTGGACACTCCCTC	1	14.942	161	1	16.3905	161	1	13.5767	161
546	RGNMS1217	GAGGGAGTGTCCAACACGCAAC	GATAGTCGACAAGCAGAGGAAG	1	14.9422	392	1	16.3907	392	1	13.5768	392
547	RGNMS1325	GAGGGAGTGTCCAACACGCAAC	GATAGTCGACAAGCAGAGGAAG	1	14.9422	392	1	16.3907	392	1	13.5768	392
548	RGNMS1346	GAGGGAGTGTCCAACACGCAAC	GATAGTCGACAAGCAGAGGAAG	1	14.9422	392	1	16.3907	392	1	13.5768	392
549	RGNMS141	GAGGGAGTGTCCAACACGCAAC	GATAGTCGACAAGCAGAGGAAG	1	14.9422	392	1	16.3907	392	1	13.5768	392
550	RGNMS254	GAGGGAGTGTCCAACACGCAAC	GATAGTCGACAAGCAGAGGAAG	1	14.9422	392	1	16.3907	392	1	13.5768	392
551	RGNMS447	GAGGGAGTGTCCAACACGCAAC	GATAGTCGACAAGCAGAGGAAG	1	14.9422	392	1	16.3907	392	1	13.5768	392
552	RM10927	TGGATCCCACTAATCCAAATGC	GAAAGACTCCTTCCAATGTTAGGC	1	15.6382	152	1	17.0475	154	1	14.0185	150
553	RM10929	GACAATCGGACTCCTAAATACAGC	AGCTGTTAAGGGTAGCAGTGTGC	1	15.733	374	1	17.2484	374	1	14.1114	378
554	RM10930	AATTGGACTTTACGAGCCTGTGC	TCTCGTCCTCACCTCAAGAGTGG	1	15.7789	272	1	17.3352	287	1	14.151	266
555	RM10940	GTGATTCAGCCTTAGCAGATGG	ATCTTCTCCGAGGTATACTCAAGC	1	16.0428	184	1	17.513	188	1	14.3569	172
556	RM10941	GAGGGTTTGTAGGATGACATGTGG	TAATGGCAGAGGAGATTGCTTGG	1	16.0663	131	1	17.606	128	1	14.3796	131
557	RM10951	GCGCACGTACATACTACTGAAGG	TAGATTTGTACGCAGGACTTGG	1	16.1653	673	1	17.7203	969	1	14.4589	673
558	RGNMS24	ATATGTTACTGATGTGTCATTGGT	TTCAATAGTGTAACTGAGGAGGTA	1	16.2846	260	1	17.8255	260	1	14.5748	260
559	AUT10954	CTATTGGGCGTTGGTCTAGTGG	CAACGAAATCATCCCTAGCTTCC	1	16.3277	274	1	17.877	278	1	14.6119	276
560	AUT10956	GGACAGTTTACAAGCATGGGAGTTGG	TGTAGGGCCCAAATTTAGTGATAGGG	1	16.3444	139	1	17.9341	149	1	14.6285	139
561	RM10958	CGCTTTCCAAACTGCTAAACGATGG	ATGCGGCGAGATGGAGGAAGG	1	16.3806	286	1	17.9927	286	1	14.6648	286
562	RM10962	GTAGATGGAGTCGTGGTTGATCG	TGACAGACGAGGAAACAGGAAGG	1	16.5242	614	1	18.1815	597	1	14.7785	614
563	RM10965	AGCTCAAGGCCTCTAAACTCCTATCC	GCAGACGATGAGGATCCATGC	1	16.5573	81	1	18.2212	81	1	14.8078	81
564	RM10968	TCCTTCACCTCCGCCTCAAACC	CCATGGAGACTAGGTGGAACTTGAGG	1	16.7122	117	1	18.4169	117	1	14.9645	117
565	RGNMS35	ATGTGTTAATGACATATAGATCCG	TAGAAATACGTAGCCAAAGATACA	1	16.7256	392	1	18.4303	392	1	14.9777	392
566	RM10973	ACTCGCGCTCAGGCTTATCTCC	CTGGCAGCCGACAAAGATACG	1	16.9379	176	1	18.5733	182	1	15.1602	176
567	RM10974	ACATCGATCACACAAGAAGCCAAAGG	GGCATGCAACATGGACGCTACC	1	16.9528	195	1	18.6778	195	1	15.1751	195
568	RM466	TCCATCACCACATTCCCC	ACCCTTCTCTCGCTCTCTCC	1	17.2779	229	1	18.9862	229	1	15.6655	227
569	AUT10987	CCTCACCATTGATCTCCATCACC	ACTTGCCCTCCTCTTCTCAACG	1	18.9347	190	1	18.9862	190	1	15.6656	188
570	RM10989	GGAAGAGTGCTCTAGTGGCAAGC	ACCAAACAAGCCCTGAGACATCC	1	18.9495	247	1	19.0029	238	1	15.6801	209
571	RM129	TCTCTCCGGAGCCAAGGCGAGG	CGAGCCACGACGCGATGTACCC	1	19.0098	204	1	19.3745	184	1	16.0401	201
572	RM10998	TAATCTGGTAAGGCGGTTGAGAATCG	CTGCCACCACGGAGATACTAACATGC	1	19.3534	335	1	19.5219	314	1	16.1874	327
573	RM11007	GTGCGGCTGTTAATGTTGATGC	TCAACAGGAGGAGACAGTACCTACG	1	19.6115	472	1	19.9299	430	1	16.4331	1253
574	RM11008	TTTGGATGGTCATTAGCCTCTGG	ATCAACCTTGCATGCTGTCTTCC	1	19.6318	262	1	9.99483	247	1	16.4541	262
575	RM11009	GATTGACGACTCACGCTGGGTAGG	CCTGCATGATTGCCTCGCTACG	1	19.6735	282	1	19.9972	270	1	16.4956	282
576	RM11010	GGATTGGGATTGTTGGGCTACC	CCTGCACAATAAATACGGTGTCTCC	1	19.674	225	1	19.9977	221	1	16.4961	220
577	RM11011	GCGAGGTGACCTTGTCGTGTGG	GCGGTAGGCGGACTTGATCTCC	1	19.6989	180	1	20.022	180	1	16.5205	180
578	RM11014	TCCCAGTTTCTCCCTCTCTAGCC	TGGGCATGCAATTCTATCTTGG	1	19.7613	155	1	20.0912	155	1	16.5845	155
579	RM11019	AACTCTTCAGTTGCTCACATCC	GTGTTGGCTTGGAAGTAGTGG	1	20.064	197	1	20.4967	197	1	16.8302	200
580	RM11020	CGCCCTGATAATAGGGTCTATCG	GGCTACGCTTATCTACGGATGG	1	20.0656	433	1	20.4983	443	1	16.8318	447
581	RM11023	CGCGAGATCAAAGACGAGAATCG	CGACGCCTTCTTCCTCCTCTCC	1	20.0958	420	1	20.5834	423	1	16.8617	420
582	RM11024	ATACACCTAGAGGCCTGGACACC	TGCTCGTTGAACTGTGACGTACC	1	20.1347	289	1	20.646	243	1	16.9007	375
583	AUT11029	CCAAGTTTCAGGGAAACCAACC	GCTTCTCCCTCTCTGCTTGACG	1	20.2517	186	1	20.8242	186	1	16.9976	184
584	RM11030	ACCTGTCTGCAGATTCCAAGATACC	TGGCTCGATCGATCTACTCCTACC	1	20.2827	280	1	20.8575	276	1	17.0282	145
585	RM11031	CATCGTCTTCATGGAAGCAACC	CCAGCAGAGAGACTGTTTGTTACG	1	20.3093	175	1	20.8816	192	1	17.0545	173
586	AUT11035	CATAGATCAGATGCCAAGAGTGC	AGAGGAGAGGATGAACATGAGG	1	20.4134	340	1	21.0376	336	1	17.1647	884
587	RM11036	ACACACCACACTGTTCCTCTCG	TCTGACATCAAAGGCTCAAAGC	1	20.4201	386	1	21.0442	404	1	17.172	386
588	RM11039	CAAGCAGCTGAAATCTGTTTCG	GCGAGCGTAATAGAGGGATTGC	1	20.4448	462	1	21.0737	462	1	17.1959	462
589	RM11040	CGTACGACGAGTAGAAGCTGAGAGG	AACTCAACACCAAGCTCGATTGC	1	20.4749	256	1	21.0998	248	1	17.2197	254
590	RM11041	CCAACATGATCGACCGCTACACG	AGCGATCAATGGCGATCAACAGC	1	20.4859	156	1	21.1117	148	1	17.2307	156
591	RM113	caccattgcccatcagcacaac	tcgccctctgctgcttgatggc	1	20.4902	150	1	21.1214	150	1	17.2342	150
592	RM11042	CAACGTGCGATCTGGCTACGC	CGTACGTCGCGTGTTGGAATGG	1	20.4957	99	1	21.1269	99	1	17.2397	99
593	RM11043	GCCTCTGAGACGTCTTCTTCTTCC	CTGCCAATAAGCTTCATCCTTGC	1	20.4958	178	1	21.1271	178	1	17.2399	178
594	RM11044	CAAGCTATTGATCCTCCTTGTCG	AGTTAAGTGGGCTATGTGTGTTGC	1	20.5202	264	1	21.1531	276	1	17.2643	272
595	RM11045	GAGGAGGACGAGAAGGATCTGG	CTCGAAGGAGGTGTAATGCTTGC	1	20.5807	269	1	21.252	269	1	17.3216	269
596	RM11046	GAGGAGGACGAGAAGGATCTGG	CTCGAAGGAGGTGTAATGCTTGC	1	20.5807	269	1	21.252	269	1	17.3216	269
597	RM11049	GGGCTTTGGAGAGCTCGAAGTAGC	GGCTCTAGCTCCCATCGCATCG	1	20.6255	190	1	21.2911	190	1	17.3618	190
598	AUT11051	TCTCTACCACCGTCTTCTCTCTCC	CTGAACGCAGCCACATCTAAGC	1	20.6563	391	1	21.3347	394	1	17.3915	383
599	AUT11052	TCTCTACCACCGTCTTCTCTCTCC	CTGAACGCAGCCACATCTAAGC	1	20.6563	391	1	21.3347	394	1	17.3915	383
600	AUT11053	CACTCCACGCCATCTCTCTCG	CTCAGACTCGGAGCTCATCTTCC	1	20.6666	161	1	21.3745	143	1	17.4007	158
601	RM11054	TAAGACGGACGTGGTCTTCAGG	GGATTGATCCAACGTACGAGTGC	1	20.6822	152	1	21.4839	132	1	17.4168	150
602	AUT11056	GGAACAAACGAAGCCTTAGTGG	GGACCCATTGTATCTGGTATTACGG	1	20.7345	214	1	21.5193	204	1	17.4746	172
603	RM11058	CGTTAATGCCGAATCAATCTCC	GAACTAGAGGAGAGTCCCTATTGACC	1	20.7576	172	1	21.5784	165	1	17.4971	167
604	RGNMS51a	TGAAGTTTCTATGAGGTTGAGTAA	TATATTGAAGGGATGATATTTGAA	1	20.787	187	1	21.6098	187	1	17.5456	187
605	RGNMS92b	AGTTGGTCACAACTCCAAGTCT	ACTCCTTTCCATAACATTTCTTAC	1	20.8573	378	1	21.7108	378	1	17.6165	377
606	RM11060	AAGCTTGCGTAGCGTAGGTGGTAGG	CCGGAATATTCTCACCGACCTTGC	1	20.8583	157	1	21.7118	156	1	17.6175	157
607	RM11062	CCGAATCGTGGTGGTGTGAGC	GCGAGCTCGATTCCTTGCTTCC	1	20.9792	219	1	21.8326	223	1	17.7235	211
608	RM11063	GCGAGGAGGAAGCAAGGAATCG	ACCTCCAACGGCCGAAACTCG	1	20.9794	93	1	21.8328	95	1	17.7237	91
609	RM11069	GGTACAATGAAGCTTGGCAACG	CGGTGGAGTAGAACCACGAAGC	1	21.0282	279	1	21.9186	202	1	17.7722	231
610	RM11070	TCCCTACTCACTCTTTCTTCTGC	TGTACGGAGTGTGTAAGAGAAGC	1	21.0452	159	1	21.9379	127	1	17.7918	131
611	RM11084	CATTGCCTCAGATTGACAAAGC	CAGAAGAAACCAAGGCAATTCG	1	21.3509	199	1	22.1583	197	1	17.9901	193
612	RM11089	CCCTCCCTATACACAGGTAGAACC	CCATGCAGTTCTGAAACTGAACC	1	21.5373	386	1	22.2145	386	1	18.1971	392
613	RM11096	AGGGAAGGGAAGTATGTATGTACACG	TATGAGTGATGCCAGCTCAATGG	1	21.684	418	1	22.3759	349	1	18.3192	355
614	RM11097	GTAGTCCAAACCAGGCCACTCAGG	GTTTGCGTTTGCGTTGTCAGG	1	21.6899	169	1	22.3817	168	1	18.3252	169
615	RM11098	CATCATCTACTCCCTCCATACTCG	CCCTACATACTCGTAAAGGAAGTCG	1	21.7168	265	1	22.4741	265	1	18.3524	257
616	RM11108	ATCTCGAGAGGTCAGAGGAAGTCG	AGCTCCAGCAACAGCAACAGC	1	21.8977	361	1	22.5737	361	1	18.5098	361
617	RM11109	GACGAAGGGAAGAGAGGTAGC	GCACACAGTAGTACAGAGATGACG	1	21.9	238	1	22.5759	226	1	18.5121	246
618	RM11110	ATGAGGCTTTGCAGCATGAGG	CCAAGCAAGGCAGTAGCAGTAGC	1	21.9991	175	1	22.7	177	1	18.6129	175
619	RM11111	CTGTTGTCGGTTACACCTTGTGC	CCACTCCTCTATAGCGTCATTCACC	1	22.0568	459	1	22.7525	516	1	18.6574	861
620	RM11113	GTCTTATCTCATTTAGTCCCGGTTCC	TGGAGTAGGGTTAGGGTTTGTGG	1	22.0766	213	1	22.7837	260	1	18.6773	221
621	RM11122	GGAGCATATTGTTCGAAGTGTTGG	TACAGCCAATTCCTTCCATACCC	1	22.1553	560	1	22.8732	548	1	18.7515	547
622	RM11124	GAAGTCGGAATCGGAATAGGC	TGGGCCCAGATAGATAGAGAGG	1	22.1792	75	1	22.8915	83	1	18.7694	75
623	RM11127	TGGAAATGCACCGACAAACTAGC	ACCTCCTGCTGGTCAAATGAAGG	1	22.2411	252	1	22.9534	250	1	18.8254	244
624	RM11128	TGGAAATGCACCGACAAACTAGC	ACCTCCTGCTGGTCAAATGAAGG	1	22.2411	252	1	22.9534	250	1	18.8254	244
625	RM11130	CTCCAAGAAGCATCAGCGTCAGC	GCGGAGTTGGTCATGGAGAGG	1	22.2523	272	1	22.9673	272	1	18.8366	272
626	RM11132	GGAGGAAGAAGACGAGGAGAAGG	CTTGGATGTCCATCTTGGAAGC	1	22.2875	115	1	23.002	118	1	18.868	115
627	RM11133	GTCCCGGGATTATTTACGTTGG	TCATTATCAATCCCGTCCACTAGC	1	22.2973	162	1	23.0119	162	1	18.8787	158
628	RM11134	GACGGCCACCACGTATAGTACC	AGCTGAAATCACCGAATGTTGC	1	22.2986	288	1	23.0131	286	1	18.88	666
629	RM11135	CAGATGGCCACCACGTATAGTACC	GATGTCGCAATCTTTGGTTTCC	1	22.3091	251	1	23.0318	245	1	18.8912	260
630	RM11138	CACTACCAGTACTGTTCCCTACTTCC	GCCTAATGGGTTCTGTACCTACG	1	22.3256	656	1	23.0488	686	1	18.9077	647
631	RM11139	GCATGATGCGTTCGTGTATTCC	CATGCATGCAGGCGTTAGTTACC	1	22.3646	234	1	23.0597	234	1	18.9352	234
632	RM11141	AACGAGAGGACGAGAATCAGAGG	CCATACCTAGGCCCACACAACC	1	22.3865	523	1	23.0939	518	1	18.9571	523
633	RM11156	TACCTCTTGACGTGTCAGTTCTGC	CTCGGTTCTGTTAGCGTAGTTCTGC	1	22.5936	265	1	23.2131	265	1	19.1249	281
634	RM11157	AAAGAGGCGACAGCGAATTATCG	TAAAGCAGCGCCATGATTGTTCC	1	22.5946	260	1	23.2141	266	1	19.1259	262
635	RM11159	GGTGTAACTCAGATCAGTTGAAGG	TGTGTTGGATACAACCTCTTGG	1	22.6505	280	1	23.2595	318	1	19.1658	349
636	RM11160	TTTCTCCATGCTTATGGTGTGG	GCATGATGGATCATATCGTCTTCC	1	22.6931	96	1	23.3184	108	1	19.1982	96
637	RM11161	ACCACCCTTCCCTGTGGTACG	CTTCTACGAGGCCACCGTCTCC	1	22.7033	253	1	23.3286	253	1	19.2084	259
638	RM11162	AGTCCACCCAGTCCGTCAATGG	GAACACTCCTCCTCTGTTCTCACTCG	1	22.7143	131	1	23.3338	131	1	19.2131	107
639	AUT11165	CTCCGTATTGACCGTTCTTCTGC	GGATTTGGGCTCTAGGGTTTGG	1	22.7757	282	1	23.3954	282	1	19.2701	282
640	RM11167	GAGGAGACGAGACGTCAGTAGGG	GTACATCACACACGCGTTATTTGG	1	22.7851	160	1	23.4046	160	1	19.2794	160
641	AUT11168	CGAATACTCCAGACGGAACTACAGG	CCATGAATCCCGAGTAGTAAGTCTCC	1	22.803	74	1	23.4226	74	1	19.2974	74
642	RM11169	CCTGCAACTTAAGCTTGTTGTCC	GAAAGCGAAACACGACATAGTCC	1	22.8077	266	1	23.4272	269	1	19.3021	263
643	RM11170	CCTGCAACTTAAGCTTGTTGTCC	GAAAGCGAAACACGACATAGTCC	1	22.8077	266	1	23.4272	269	1	19.3021	263
644	RM11172	CTCGTCTACCCTTCCCTCTCTGC	CGGCGAACAAGCATAACTAGTGG	1	22.8328	284	1	23.4518	284	1	19.3272	284
645	RM11173	AGGAGGATCCTGTAGCCATCACC	CTGTTAATGTCGGCGATCTTGG	1	22.8386	192	1	23.4576	192	1	19.333	192
646	RM11174	GCCCTATCCCAATTCCCAACG	CGCGCGAATTACTACTACGAAGACG	1	22.8522	390	1	23.4719	381	1	19.3467	390
647	RM11189	CTGGATCTGGATGCCAGCAAGG	GGTGGGTCCGTCTATGGATGAGC	1	23.3	87	1	23.8914	101	1	19.5495	87
648	RM11191	GGTCTCACATTGGACAACACATTGC	CTTCCCGGAAACCCTAGGATGC	1	23.3445	170	1	23.9912	170	1	19.5941	170
649	RGNMS220	TTTAGCTAGATAGATTGGAGACG	TCATCAAACTGATCAGAACTAAAT	1	23.3446	284	1	23.9913	279	1	19.5942	283
650	RM11192	CTCCTCTGACTCGTTCGCACTGG	AACACCGGCTGTCACGTTGAGC	1	23.3454	208	1	23.9921	193	1	19.595	208
651	RM11195	TTACGCTAATGCTTGCTGCTTGC	ATGGAGAAACTGGACGGAGAGG	1	23.4168	84	1	24.0846	84	1	19.6616	87
652	AUT11201	GTCGTCGCCATCATTGGTATCG	CACCTTTCCCGGATCAAGTACG	1	23.5447	196	1	24.1803	194	1	19.768	182
653	AUT11205	CAAGGATAAGGACATCTCTTGC	CTCAGGACCCTGCTTAGATACC	1	23.561	435	1	24.2026	421	1	19.7843	442
654	RM11207	GTGGTGAGTCAGGTGGCAATCC	GCCACCATCTCGTACGTCTTCG	1	23.5956	429	1	24.2573	426	1	19.8229	429
655	RM11208	TAACTGGTCCATGACAGGATAGG	CCTGTTGTACACCTACTTGGTTGG	1	23.6488	388	1	24.3312	375	1	19.8776	382
656	RM11210	ATCGGAGAAATCACAGGAAACG	AGCAAAGACAGAGGGCCATAGG	1	23.6552	174	1	24.3438	156	1	19.8841	174
657	RM11211	CGGGTGGCTATTTCATAAGTTGG	ATGCGGCAAGTTTGTTACTTCG	1	23.6859	198	1	24.3783	444	1	19.9145	199
658	RM11212	CGGGTGGCTATTTCATAAGTTGG	ATGCGGCAAGTTTGTTACTTCG	1	23.6859	198	1	24.3783	444	1	19.9145	199
659	RM11213	TAATAAGGGATTCCGGCCGATGG	CATCGACCCTTCCATCCAATACG	1	23.7394	297	1	24.4345	289	1	19.9582	256
660	RM11214	TAATAAGGGATTCCGGCCGATGG	CATCGACCCTTCCATCCAATACG	1	23.7394	297	1	24.4345	289	1	19.9582	256
661	RGNMS462	GGATTTGACGGTAGAGAAGACT	ATAAATCCACATACACTGTGAGAG	1	23.7555	105	1	24.4533	102	1	19.9743	105
662	RM11219	CGGTACGGACTTGCAATGATGC	CGTAGCATGGCCTTGTGTTGG	1	23.8207	173	1	24.509	227	1	20.039	181
663	RM11220	CACGACGAAGTACTCGAAGATCC	GTAACGAGTCAAACCGAGAGACC	1	23.8371	267	1	24.5255	273	1	20.0554	267
664	RM11225	ATGTTGACAACTGAGAGCGTTGC	TGGACCCTCTTGAAGTAGTTCTGC	1	23.8982	248	1	24.6033	250	1	20.1134	247
665	RM11236	GGGCCTGTACTGTGTCTGTGTAGG	CTTGCTCTTAGTTTCTTAGCCGTTCC	1	24.2184	115	1	25.0323	112	1	20.4028	115
666	RM11237	GATCACTGGCTAATGCAGACAGC	GGACAGCTCCACTGTTCAAATGG	1	24.2377	480	1	25.0598	468	1	20.4215	479
667	RM11238	AGATCTGGAGGGCGCATGAGG	CACCACAGCCTCCAGGATCACC	1	24.2747	127	1	25.1051	130	1	20.4586	127
668	RM11240	TTCCGTCGCTGTGTTCTTCTCC	TGTCGAGGTCCTCTTCGTCTGG	1	24.3018	377	1	25.1357	378	1	20.4862	374
669	RM11241	TGCCTCTGCTTGACTTCACTTCC	TTGTCCTTGACGCATGTAGTAGTCC	1	24.3083	188	1	25.1518	188	1	20.4927	180
670	RM11242	TCGCCTAGTCCAACGCATTACAACG	GAGGTGAGGTTTGCTTCGAGTGAAGG	1	24.3325	198	1	25.1865	191	1	20.5167	198
671	RM11245	AGCGTGAATGCACACTTCTTTCC	ATTCAAACACGGACGACAGACG	1	24.348	334	1	25.2042	452	1	20.5319	324
672	RM11250	CCTCTATATCATGAGAGGCATGTCG	CATAGGAGGTCCATCAAAGTACCC	1	24.4849	405	1	25.4265	405	1	20.7212	401
673	RM11251	TCCCAGCAAATCAATCTCTGAGC	GACGGAGACGGAGAAGAAGAAGG	1	24.5543	198	1	25.5451	195	1	20.7792	198
674	AUT11252	TTTCGGACATGCGTAGTTGTAGG	CGTACGTGAAGCAATAAGGTGAGC	1	24.5841	224	1	25.5885	304	1	20.8091	197
675	RM11254	CACGCAATGCTGTTGGATAGG	AAATCCTTGATGCCCAGAGAGG	1	24.6141	337	1	25.6185	328	1	20.839	337
676	RM11255	GCAGCACAGCTACACCACACTAGC	TCCGTTTCCGAAAGGCTACTCG	1	24.6146	245	1	25.5716	245	1	20.8395	245
677	AUT11256	ACGCGCACCAAGAGAGAAACG	CTCGGCAAGGAACTGGTCAGG	1	24.6155	252	1	25.6199	210	1	20.8403	246
678	RM11257	TTCTAGGAGCGAAGGAGCCTACC	CAAACCCTGCGTATGGATGAGG	1	24.6221	482	1	25.6297	334	1	20.8469	611
679	RM11258	GCTCCACCATTCATCCATACAGC	ATTCGATTGGTTCCTTGGCTTCC	1	24.6546	166	1	25.6735	136	1	20.8806	266
680	RM11259	GTACGAGTTGACGAGGTGGTTGG	ATACGCTTCCCTTTCCATTCTGC	1	24.6655	374	1	25.7121	371	1	20.8915	374
681	RM11267	TTAAGCTCTCGACAATTCCGTACC	CATTCCATGCTCGATGTTAAGC	1	24.7711	266	1	25.7769	262	1	20.9497	264
682	AUT11272	TAGGGTGTCCTATCAGGTGAGG	TTACTACATAGCTACTCCCTCTGTCC	1	24.8669	264	1	25.8348	260	1	21.0015	238
683	RM11273	CGATCCCAGCCGTCCATTTCC	GCGAGGAGGAGGATGCTCTTGG	1	24.942	197	1	25.9182	197	1	21.0662	197
684	RM11274	CGATCCCTCTCACTGCACAAACG	AGGACGGCCAAACTCTGCTTGC	1	24.9452	272	1	25.8928	272	1	21.0694	272
685	AUT11279	GGCCCTCATCACCTTCGTAGC	CGTCCTCCCTCTCCCTATCTCC	1	24.9829	168	1	25.9602	122	1	21.1043	158
686	AUT11280	GGCCCTCATCACCTTCGTAGC	CGTCCTCCCTCTCCCTATCTCC	1	24.9829	168	1	25.9602	122	1	21.1043	158
687	RM11288	CAATATCAGCCTAGCACAAAGG	CTATCCAACCAGCCATTTATCC	1	25.0557	360	1	26.0603	501	1	21.1785	404
688	RM11292	TTCTATGTATGCACGGAAGACG	CGTGGGTAAGTTTAGTGTCACC	1	25.0973	501	1	26.1062	475	1	21.2169	504
689	RM11293	CATCGCTTAGCAATCTCCTTGG	GACAAACGGAGAGGGAAGAGACC	1	25.2264	182	1	26.277	168	1	21.3285	173
690	RM11294	CATCGCTTAGCAATCTCCTTGG	GACAAACGGAGAGGGAAGAGACC	1	25.2264	182	1	26.277	168	1	21.3285	173
691	RM11295	GGCGTACGGGTGTACTAGATAGGG	CACGTACGACCATTTCACAAACG	1	25.381	152	1	26.5363	144	1	21.5161	149
692	RM11296	CGTTCACTGGTGGGTCTCTCC	GACAGAAACGGAGTCAATTCATCG	1	25.3849	280	1	26.51	279	1	21.52	280
693	RM11297	TACATGCAACAGGTGCCGATTTGC	GATCAATTGCCGCCACTCTGTCC	1	25.4186	150	1	26.517	150	1	21.5538	150
694	RGNMS169	ACCTATATGGGCTTAGTCTCTCT	AGAGAACACAAACTCAGACACC	1	25.5001	383	1	26.7083	383	1	21.6353	383
695	RGNMS303	ACCTATATGGGCTTAGTCTCTCT	AGAGAACACAAACTCAGACACC	1	25.5001	383	1	26.7083	383	1	21.6353	383
696	RM11302	CTTAGGCCCACATTTGATGTCC	CCCATCGTTTGCTCATATTCC	1	25.5252	175	1	26.7349	160	1	21.6606	183
697	RGNMS337	CTACTGAGAGCAAATAGATTGAAC	ATTCCCAGTAACTACTAACCAAAC	1	25.5768	103	1	26.8435	103	1	21.7163	103
698	RGNMS398	ACCACACACGGTCACACGTCTC	GAGATGATGGAGAACGAGAAGG	1	25.5866	359	1	26.8532	359	1	21.7259	359
699	RGNMS403	TATATATGGATAATGGGAACATTG	TAATAGGACCACATCATTGAATAC	1	25.5874	275	1	26.854	282	1	21.7267	273
700	RM11307	AAAGCTCTGCAATCTTCTCTCC	GAATACGACATCAGAACAGTGC	1	25.5875	147	1	26.8541	154	1	21.7268	145
701	AUT11309	CACACTCCCATGCTAACAACTGG	CATCAAGAAGAGCAGTCCTGTGC	1	25.6292	193	1	26.9191	185	1	21.7685	193
702	RM5	tgcaacttctagctgctcga	gcatccgatcttgatggg	1	25.6292	193	1	26.9191	185	1	21.7685	193
703	RM5	CACACTCCCATGCTAACAACTGG	CATCAAGAAGAGCAGTCCTGTGC	1	25.6292	193	1	26.9191	185	1	21.7685	193
704	RGNMS13	CAAGTGTATTGTAGTGTGTGTGAG	AAGACAGTGATGGACACTAACAG	1	25.6355	343	1	26.9254	330	1	21.7748	347
705	RGNMS225a	CAAGTGTATTGTAGTGTGTGTGAG	AAGACAGTGATGGACACTAACAG	1	25.6355	343	1	26.9254	330	1	21.7748	347
706	RGNMS237	CAAGTGTATTGTAGTGTGTGTGAG	AAGACAGTGATGGACACTAACAG	1	25.6355	343	1	26.9254	330	1	21.7748	347
707	RGNMS339	CAAGTGTATTGTAGTGTGTGTGAG	AAGACAGTGATGGACACTAACAG	1	25.6355	343	1	26.9254	330	1	21.7748	347
708	RGNMS305	AGAGTAGAGAATGTCTAGTGCCTC	GTACCAACGACAATATATGCTAAG	1	25.6362	267	1	26.9261	267	1	21.7755	267
709	RGNMS64	AGAGTAGAGAATGTCTAGTGCCTC	GTACCAACGACAATATATGCTAAG	1	25.6362	267	1	26.9261	267	1	21.7755	267
710	RGNMS117	CAGTAACCACGAGATATATACGG	GAGGCACTAGACATTCTCTACTCT	1	25.6365	273	1	26.9263	273	1	21.7757	273
711	RGNMS261	CAGTAACCACGAGATATATACGG	GAGGCACTAGACATTCTCTACTCT	1	25.6365	273	1	26.9263	273	1	21.7757	273
712	RGNMS343	CAGTAACCACGAGATATATACGG	GAGGCACTAGACATTCTCTACTCT	1	25.6365	273	1	26.9263	273	1	21.7757	273
713	RGNMS53c	CAGTAACCACGAGATATATACGG	GAGGCACTAGACATTCTCTACTCT	1	25.6365	273	1	26.9263	273	1	21.7757	273
714	RGNMS167	AGGTAGTAGGTAGGAGCAGGAG	CAAGTGTATCGGAGTAGTAGCAG	1	25.637	380	1	26.9269	381	1	21.7763	379
715	RGNMS6	AGGTAGTAGGTAGGAGCAGGAG	CAAGTGTATCGGAGTAGTAGCAG	1	25.637	380	1	26.9269	381	1	21.7763	379
716	RGNMS70a	AGGTAGTAGGTAGGAGCAGGAG	CAAGTGTATCGGAGTAGTAGCAG	1	25.637	380	1	26.9269	381	1	21.7763	379
717	RM11312	CAGGCTAACAGCGGTAGAACACC	GCAAACAAGGCTCGAAAGAACC	1	25.6715	482	1	27.0021	565	1	21.8092	896
718	RM11313	TGAGGCTGATAGAAAGCAGAATGC	CCCGTTTCTTCCATATCATGTCG	1	25.6829	388	1	27.0148	441	1	21.8211	367
719	RM11314	TGAGGCTGATAGAAAGCAGAATGC	CCCGTTTCTTCCATATCATGTCG	1	25.6829	388	1	27.0148	441	1	21.8211	367
720	RGNMS1016	TATACATAAATTGAGGCAAAGGTA	AAAGAAACGTAAACACATGAAGT	1	25.6833	388	1	27.0152	442	1	21.8215	367
721	RGNMS103	TATACATAAATTGAGGCAAAGGTA	AAAGAAACGTAAACACATGAAGT	1	25.6833	388	1	27.0152	442	1	21.8215	367
722	RGNMS1034	TATACATAAATTGAGGCAAAGGTA	AAAGAAACGTAAACACATGAAGT	1	25.6833	388	1	27.0152	442	1	21.8215	367
723	RGNMS378a	TATACATAAATTGAGGCAAAGGTA	AAAGAAACGTAAACACATGAAGT	1	25.6833	388	1	27.0152	442	1	21.8215	367
724	RM11315	CATGAGGTTCTGAGTGGATCACC	TCGATCGATCACGTACCAGTCC	1	25.6946	195	1	27.0235	200	1	21.8331	175
725	RGNMS479	ACTAGTTGACCGTTTCCACTATC	AAACTTACTTCTCTCGGCGAGGC	1	25.7705	322	1	27.1095	322	1	21.9095	322
726	RGNMS1125	GTGGATGAACAGATCAAATAGTAA	AGAACTCATTCGAGGTAGGAAA	1	25.7707	320	1	27.1097	320	1	21.9097	321
727	RGNMS161	GTGGATGAACAGATCAAATAGTAA	AGAACTCATTCGAGGTAGGAAA	1	25.7707	320	1	27.1097	320	1	21.9097	321
728	RGNMS431	GTGGATGAACAGATCAAATAGTAA	AGAACTCATTCGAGGTAGGAAA	1	25.7707	320	1	27.1097	320	1	21.9097	321
729	RM11319	TCACCTCCGGAGTGTAGTAAGC	TCTCTCTCATCTGTGTCGTTCC	1	25.7752	328	1	27.1144	328	1	21.9145	702
730	RGNMS122	AATGTCTTACACCTCTTAATTTCC	CTCAATAGAGAAACATGTACCATT	1	25.7987	386	1	27.1425	426	1	21.9366	366
731	RGNMS239	AATGTCTTACACCTCTTAATTTCC	CTCAATAGAGAAACATGTACCATT	1	25.7987	386	1	27.1425	426	1	21.9366	366
732	AUT11321	TTCATATGGCTCGGAAAGAACTCC	TAGCGGAAACGCGTACGTAAAGG	1	25.7988	351	1	27.1426	391	1	21.9367	331
733	RM11322	CCCACAAGTCAGTGACGCTACG	CCTCCTCCTCCTCCTCTTACCC	1	25.8027	196	1	27.1465	192	1	21.9405	194
734	RM11323	CCACCGCCAGACATCATCTTCG	TTTGCTCCTCCTCCACGCTTCG	1	25.8108	81	1	27.1547	81	1	21.9487	93
735	RGNMS253	GTTAATCTCCTATTAAGGTGTCGT	ATTGCATACTACTAGTCCAGAACA	1	25.8386	209	1	27.1845	209	1	21.9767	209
736	RGNMS467a	GTTAATCTCCTATTAAGGTGTCGT	ATTGCATACTACTAGTCCAGAACA	1	25.8386	209	1	27.1845	209	1	21.9767	209
737	RGNMS206c	GATTTATTCTTATTGACGGTTTCT	ATGTTTAATCAACAAGACATCAAC	1	25.9154	335	1	27.2533	335	1	22.0623	335
738	RGNMS268a	GATTTATTCTTATTGACGGTTTCT	ATGTTTAATCAACAAGACATCAAC	1	25.9154	335	1	27.2533	335	1	22.0623	335
739	RGNMS345a	TTCTCTAGAGTTCTCTCTCTCGAT	TTCATACTAAACACTTGCAGCTAT	1	25.9343	315	1	27.2757	315	1	22.0829	315
740	RGNMS485	TTCTCTAGAGTTCTCTCTCTCGAT	TTCATACTAAACACTTGCAGCTAT	1	25.9343	315	1	27.2757	315	1	22.0829	315
741	RGNMS164	GTAAGTGAACTATGGCTTGTGATA	AAATCTAGAATCTAAGGCAGTCAT	1	25.9552	179	1	27.3031	179	1	22.1037	179
742	RGNMS394	GTAAGTGAACTATGGCTTGTGATA	AAATCTAGAATCTAAGGCAGTCAT	1	25.9552	179	1	27.3031	179	1	22.1037	179
743	RM11325	CGAGACGAGCTGACAACGAAGC	TAACGGCTCGACGACAGTAGAGG	1	25.9912	196	1	27.3514	196	1	22.141	199
744	RM11326	TTTGACCTCGGATGATAGTTCC	CACAAATGACAGGCTTACACTGG	1	26.0145	371	1	27.3759	367	1	22.1643	367
745	AUT11328	ACACCGCACCTAAACCCAAGACC	AGGCGCGTGAGAGAGGAATGG	1	26.0327	184	1	27.4093	175	1	22.1817	186
746	RM11330	TGGATGAAGTCCACCGAGACG	GCCACTTAGCAACAACCACTTCC	1	26.0534	296	1	27.43	294	1	22.2024	294
747	AUT11331	CGACAGTTTCTTCCCTATACTTGG	TTTCATCTTGGGTTCGAGTAGG	1	26.0649	297	1	27.4416	257	1	22.215	265
748	AUT11333	ATTTATGCCTTGGCCACTCAGC	GCAATGCAAGGGATGTTTATGG	1	26.1036	113	1	27.48	110	1	22.2532	101
749	RM11334	ACTCTGCCAAGGTCAAGAACTGC	CTGTCCTCCATGGAAAGATAAAGC	1	26.1039	167	1	27.4803	231	1	22.2535	553
750	RM11336	TTGATCCCTTTGCTTCTCTCTGC	GACCTAGGGCCTGACTAGTGACC	1	26.1255	578	1	27.513	648	1	22.276	564
751	RM11337	TTGATCCCTTTGCTTCTCTCTGC	GACCTAGGGCCTGACTAGTGACC	1	26.1255	578	1	27.513	648	1	22.276	564
752	RM11340	CGCGCGATAGTATTAAATCTGG	GCGACAACCGATAATATGTGG	1	26.1664	284	1	27.5519	220	1	22.3173	224
753	RGNMS108	TGCTCTTCTGGAAATAATATGTAG	AGACATAAATGCATTACATTGAAC	1	26.2193	334	1	27.6141	334	1	22.3706	334
754	RM11344	CTCAGCGAGACACGGTAAATTAATGG	ACACCGAATAGTGGACATTGACTGG	1	26.2594	328	1	27.6493	328	1	22.4132	327
755	RM11346	GACAACAATGGCCTCATCTTCC	GTCGTCGTCCTCGTAGTTCACG	1	26.2689	98	1	27.6742	95	1	22.4232	98
756	RM11351	AAGCATGTGTCATCGTTGTGTAGC	CGCCATATATCGGGCTGTATTAGC	1	26.4102	380	1	27.8149	352	1	22.5725	607
757	AUT11353	AACAACCAGCGTATGCGTTCTCG	CCCACGGCTTTGTAGGAAGAAGC	1	26.4654	109	1	27.871	103	1	22.6248	91
758	AUT11355	GTTCGTTTCCGAGATGTCACTGG	CGGGAGAGGGTACGATGAGTACG	1	26.5231	157	1	27.9436	157	1	22.6841	155
759	RM11356	ATCCTGATTCCTGTTCCTGATGC	CCACTTGTTCAGGGTTCATTTAGG	1	26.5378	358	1	27.9582	310	1	22.699	335
760	RM11357	GATGATCACCCACAGCGATCC	GGACATCTGATTGCGAGGTTGG	1	26.5453	419	1	27.9649	412	1	22.7064	444
761	RM11358	TTGGTGTTTCTGACCGGATAAGG	CTAGTGAGCGCCGGTATTAAAGG	1	26.5477	643	1	27.9721	587	1	22.7088	601
762	RM11359	TCCAACCCTCCTCTCTATAAATACCG	CTCCATGTGTCCTCCTCGTTCC	1	26.5515	180	1	27.9759	183	1	22.7126	180
763	RM11360	TTCGCTTGTGAGATAGCAACTCG	AGTCCAGATGATGACGGTAATGACG	1	26.6074	111	1	28.0341	111	1	22.7682	102
764	RM11361	TGCTAGCTGCCTACCCTCGAAGC	AGGCAGGCATCGGCTATATTCTCG	1	26.6076	250	1	28.0343	234	1	22.7683	240
765	RM11362	TACGTGCGGGCAGTAAATCTGG	GTCGTTCTCTCTCCCTCAAATACACC	1	26.6119	479	1	28.0386	421	1	22.7726	470
766	RM11364	GTGTTAATGGTCCAGGTGTCTGC	CGCGTAATTAAGAAGTGGACTCG	1	26.6261	284	1	28.0527	283	1	22.7868	284
767	RM11366	AAGCTGAAACCCTCCTCACTTCC	GTACACGTAATCAGCGCCTTCG	1	26.6663	174	1	28.1075	177	1	22.8278	180
768	AUT11370	CTCAACCCGGCTTTCCATCTCG	GCTGCAGAGTCTCGCACGTTCC	1	26.7281	186	1	28.188	190	1	22.8878	172
769	RM8129	CTCAACCCGGCTTTCCATCTCG	GCTGCAGAGTCTCGCACGTTCC	1	26.7281	186	1	28.188	190	1	22.8878	172
770	RM11371	GGAGCAGAGGATGGCGTTGTCC	GATTAACGCTCCCACGCCTCTTCC	1	26.7317	326	1	28.1917	326	1	22.8915	326
771	RM8130	GCAGAAAATTTCCATTTAGCATCT	GGATATGACTTACTACTGCAACAAATCT	1	26.7723	290	1	28.2216	172	1	22.9219	198
772	AUT11373	CCATTTAGCATCTAAGGGCTCTTTCC	TGTGGTAGGACTTCTCCGTATTGG	1	26.7723	373	1	28.2216	255	1	22.9219	281
773	AUT11374	CCATTTAGCATCTAAGGGCTCTTTCC	TGTGGTAGGACTTCTCCGTATTGG	1	26.7723	373	1	28.2216	255	1	22.9219	281
774	AUT11375	CCATTTAGCATCTAAGGGCTCTTTCC	TGTGGTAGGACTTCTCCGTATTGG	1	26.7723	373	1	28.2216	255	1	22.9219	281
775	RM11377	AAACCTAACTCAGTGTCCCAGTCG	GGTGTCCTGATGATGATTTACCC	1	26.8195	370	1	28.27	370	1	22.9673	373
776	RM11379	GGCGTGACGGATATTTCTTTCTCC	GCTCTCGTCATCGACGCTACTGC	1	26.848	299	1	28.2842	308	1	23.0082	311
777	RM11380	GCCAACGCCGCATATAACACC	CACGTCAACCAATTCCACTACCC	1	26.884	265	1	28.3298	265	1	23.0353	265
778	RM11381	CTAGCGGATGAAGTGATGAGACG	GCTGGTGGACGTTACTGTGTGC	1	26.9326	168	1	28.3874	168	1	23.081	168
779	RM11382	TCTCACATACTCCGGAATCTTTGTCC	ATCTGCCTGTAAATCGCGAGACG	1	26.9328	364	1	28.3876	364	1	23.0812	366
780	RGNMS195	CATTTCTTTCTTTAATTGCCAG	GTGTAGATTGGGAAATTTCAGT	1	26.9388	775	1	28.3936	782	1	23.0874	779
781	RM11383	CTCTCCTTCACTTCTCCCTGATCC	AGCAATGGCGATGGAAGTAACG	1	26.9388	123	1	28.3936	130	1	23.0875	127
782	RM11393	TTGGTTGATGGGCAGGAGAAGG	AGCAATAGGCAAGATGAGGAAGTCG	1	27.0228	393	1	28.496	395	1	23.1692	292
783	RM11394	TTGGTTGATGGGCAGGAGAAGG	AGCAATAGGCAAGATGAGGAAGTCG	1	27.0228	393	1	28.496	395	1	23.1692	292
784	RM11395	TTGGTTGATGGGCAGGAGAAGG	AGCAATAGGCAAGATGAGGAAGTCG	1	27.0228	393	1	28.496	395	1	23.1692	292
785	RM11396	CCCGCAGTAAGGAACACATCC	TATGGTCCAGGAACGACTTGAGC	1	27.0253	166	1	28.4985	169	1	23.172	166
786	RM11397	CTCCTCCTTCCCTCTTTCCATGC	GTCACCAGTGACGGAGAGAGTCG	1	27.2462	240	1	28.6397	231	1	23.2965	237
787	RM11404	GGAGAGCGTCGATGAGATGAGG	CATGAGGGCATTTGATACTTCAGG	1	27.4743	297	1	28.974	297	1	23.5177	301
788	RM11407	TGATTAAGGGTAGGTACCAGAGTGC	GCAGCATACATCCCTCCTTAGC	1	27.6116	270	1	29.0809	262	1	23.6394	244
789	RM11408	TGATTAAGGGTAGGTACCAGAGTGC	GCAGCATACATCCCTCCTTAGC	1	27.6116	270	1	29.0809	262	1	23.6394	244
790	RM11410	CATAACCCTGAAGTGGTGTGACG	GTGCTTGATGATATGGTCCTTGC	1	27.6384	147	1	29.1019	137	1	23.6612	147
791	RM11411	TAAGTGCTATTGTGGTTGACCCTTCG	AAACGGCGTTGTTTCTCTGAGG	1	27.7123	431	1	29.1575	375	1	23.714	375
792	RM11412	CCCATGGTCCAAGCCTAAAGC	CGCCACAAAGCATGCAAATACC	1	27.741	182	1	29.1898	156	1	23.7438	156
793	RM11414	GGAAAGTAGAGAGAAGAACTCAGC	CACTACTTGTAGGTCAACATACCG	1	27.7613	480	1	29.2133	480	1	23.7647	480
794	AUT11417	ATGTTGTCGAGTCGTGGTAATGC	TATTCCTCGGTGTATGGGTCTCC	1	27.7979	184	1	29.2566	184	1	23.79	182
795	AUT11425	GATTCCATAGCTGCGTGATTCTCC	AGATGAAACTGGCACGTGTGTCG	1	27.8989	106	1	29.3533	114	1	23.8846	102
796	RM11427	CCGTCATTGTCAAACACCTTAAGTCC	TCATATGTAGCAGTGACATGGTGTCC	1	27.9553	256	1	29.3729	256	1	23.9407	228
797	RM11430	GGAACTGCAGATTTGATGGAGAGG	CATATTCCACTGGGCGTCTGG	1	28.0524	96	1	29.4955	96	1	23.9769	88
798	RM11431	GGTGAACAAGTTCGACGACTGC	TGGCGATGGTACATATCGAAACC	1	28.0586	184	1	29.5017	184	1	23.9831	184
799	RM11432	ATCGTGTACGCCGACTGGTACG	ACAAACCAACAGAGAGGAGGAACG	1	28.065	191	1	29.5079	193	1	23.9895	191
800	RM11435	CCAGCAGAAACGCCATACAAGC	GGAGAGGAGGGATCGAGAGTGG	1	28.1156	189	1	29.5399	201	1	24.0226	187
801	RM11437	GCAGTGAGACACCACCAAGAAGG	AAACCCGTGAAATACACCAAGACC	1	28.2415	139	1	29.6975	139	1	24.1548	135
802	RM11438	GCACGGTTCTCTTTCTGTGATAGC	TTTCGAAGACCGTAGTAGCAGTGG	1	28.2427	175	1	29.6988	202	1	24.156	172
803	RM11441	ACTCTAGCACGAATCACAACACC	TGATTCAGCAACTTGGATGAGC	1	28.2694	371	1	29.719	365	1	24.1728	337
804	RM11445	AGGCTGATGATCGCAAAGTTCC	AAAGCATATACCACCAGCCAACC	1	28.3552	151	1	29.7861	151	1	24.237	151
805	RM11446	GAAGCTGATAAAGCCAAGAGG	CTACTCCACCAGTAGAAGTAGGC	1	28.4616	168	1	29.8828	168	1	24.3286	146
806	RM11448	GAAGTGATCATTGGCCTGTTGC	GCATAAACAGCAGGATCCATATCAGG	1	28.5716	170	1	30.0275	168	1	24.4267	180
807	RM11449	AAGTCGACAATGTCATCTCAGG	TTCAGCAATAAGCTTCGCTACC	1	28.577	398	1	30.0328	364	1	24.4321	326
808	AUT11450	AAAGCCTGGATAAGATGGTTCG	CTGTAGTTGCTGTTTGCCTGTCC	1	28.5775	123	1	30.0333	107	1	24.4325	113
809	AUT11451	ACCACCTCCCATGTTTCAAGG	CCGAAACTTTAGCACCTGTGAGC	1	28.6228	254	1	30.0156	254	1	24.4575	224
810	AUT11452	ACCACCTCCCATGTTTCAAGG	CCGAAACTTTAGCACCTGTGAGC	1	28.6228	254	1	30.0156	254	1	24.4575	224
811	RM8128	CATATGAACTTCTAAGGAAGAAA	ATGTACTTAAAGTTCCTGATGC	1	28.623	167	1	30.0158	167	1	24.4576	137
812	AUT11454	GTGGAGGAGCGAAGGGAACACG	CCTCCCATATAAACCGGCGAACC	1	28.663	139	1	30.0869	149	1	24.5467	137
813	RM11456	AGCTCACCTCAACTCCGGAAGC	CTGGGAACCTCCTCGATGACC	1	28.7977	424	1	30.2252	417	1	24.6348	424
814	AUT11459	CACCCTGCAGACACAGTACGC	GAGCTCCGAGAAGCCTCATCC	1	28.8377	77	1	30.2685	77	1	24.6715	71
815	RM11460	GTCGACCTGCCGCTTCTTCAGC	TCGATTTCGTGTTCGTCGTCTCG	1	28.8475	195	1	30.2783	195	1	24.6813	195
816	RM11461	ATTGGCCAAGAATCCCATCAAGAACC	AAAGGCAGCTCGCCCTTCTTGC	1	28.8897	147	1	30.34	143	1	24.7233	147
817	RM11462	GAGCTGCCTTTGCTTCTTTGC	TGTGCTGTAGTGCTCGTCTTTCC	1	28.8899	91	1	30.3402	87	1	24.7234	83
818	RM11463	ACGAGCACTACAGCACACATGC	AATGCTGCAACCTCTTCTTCTCC	1	28.8899	144	1	30.3402	128	1	24.7235	134
819	AUT11465	GCCAACACGAACTCCCGAAGG	CTGCTCCGTCTGCATCGTCTGC	1	28.9276	366	1	30.3752	361	1	24.7613	366
820	RM11466	GCCAACACGAACTCCCGAAGG	AAATGAATTGCCACCTCCTCTCACC	1	28.9276	411	1	30.3752	406	1	24.7613	411
821	AUT11467	TCCATTCCATTCACCATCATCC	ATCAAACGACGGTGTTCGAAGG	1	28.9476	190	1	30.4292	178	1	24.7813	188
822	RM11468	TAATCTGGCTGGACACAGTACG	GTAGCTAGGAGTACATGCTGATAACC	1	28.9508	315	1	30.4319	363	1	24.7847	289
823	AUT11469	GCATGCAAGCTGAGTGTGAAACC	TTTGCTTCCTTGCTTTGCTTGG	1	28.9542	159	1	30.4353	155	1	24.788	155
824	RM11470	CTCGTCCTGGAACTGGTACTCG	CTCCTCTGTCCATCTCCATCTCG	1	28.9549	155	1	30.4361	155	1	24.7887	155
825	RM11471	GCTGGTCTCGCGTAAACTCATCG	AACTCCCTTCCGTACCGAACAAGG	1	28.9574	297	1	30.3739	297	1	24.7912	298
826	RM11475	GAGGAGCTCATGTTAGTGGAGAAGG	TTCAGCTGGAAGCACAACTTCG	1	29.0061	278	1	30.5451	324	1	24.8402	273
827	RM11476	GCGCTATATAATAAGGCGGAGGTACG	CCGATAACACCCAAGCCAAGC	1	29.0341	100	1	30.5856	100	1	24.8682	100
828	RGNMS75	AACAAATTCTGAAGCCTGATTA	TATATAATAAGGCGGAGGTACG	1	29.0344	387	1	30.586	387	1	24.8685	387
829	RGNMS69	TATCTGAACAAATTCTGAAGCC	GCTATATAATAAGGCGGAGGTA	1	29.0344	395	1	30.586	395	1	24.8685	395
830	RM11477	GTTGCCCATTTGTAGCCTCATGG	CCGACAATTAAGGGAGGGAAAGG	1	29.0369	188	1	30.5881	188	1	24.8711	188
831	RM11478	GCCGCGTGGGTATAATTGAAGG	ACCTGGTCTCCAGGCTGAACTCG	1	29.0574	282	1	30.6109	282	1	24.8953	282
832	AUT11479	CGAGCTCCATCAGCCATTCAGC	ACTTGAGAGCGAGATTGGGAATCG	1	29.0921	98	1	30.6456	96	1	24.9302	92
833	RM11480	TCTAAGAATAGCGTGGGACCTATGG	TGTCTTGAGGAAAGAAGCAAGAGG	1	29.1221	196	1	30.688	200	1	24.9534	192
834	AUT11484	GCAAGTCGATAGGCTAATCAATCC	CATGTGTAGTGGGAAGATGTGTGG	1	29.2672	296	1	30.7858	329	1	25.0727	308
835	AUT11486	AGCAGACCAATGAACCATGAACC	GGTTTGGCTAAACTCATGAGAGAGG	1	29.3008	155	1	30.8143	125	1	25.1041	143
836	RM11487	AACTGTCAGGTGGAAGAATGTGG	CTGCACAGATGTTGAAGCGTAGG	1	29.3116	435	1	30.8205	427	1	25.1133	437
837	RM11488	CAGACCAAGGAGGAGAATGAAGG	AGTTGTTGCCTGCACTACACAGC	1	29.3167	403	1	30.8256	373	1	25.1184	371
838	RGNMS230b	GCTCGATCTCTCTCTAATCCTA	GAATACATCAATTCTCACACCA	1	29.3171	233	1	30.826	201	1	25.1188	201
839	RM11490	CCGCGCGAGTTCTAATCTAGCC	GTGACGGGTTTGTTGGTGTTGG	1	29.3371	141	1	30.8462	141	1	25.1387	141
840	RM11495	AGACGCGAACACACAGACAGC	CGTGTATAATAGCGGGCGATCC	1	29.4271	362	1	30.9396	354	1	25.2311	360
841	RM11496	CTCGGCTTGAAGATTGATTTCTGG	ATTCTATGGCCAAGAGTGATGGAACC	1	29.4315	166	1	30.9439	166	1	25.2354	166
842	AUT11497	CGGGTCAGTGAGAGGAGAGAGG	GGTTCGTCCTCCCTGTAGTCTGC	1	29.4582	186	1	30.983	174	1	25.2619	182
843	AUT11501	CGTGAACAAGATTTGTGCCGTTGC	ATACGGCGGTTTCGCACATTCG	1	29.5229	262	1	31.0492	262	1	25.3265	262
844	RM11508	TGTGCTTCATCCAATCACTCTCC	CAAAGTTGCTCCCACTCATGTCC	1	29.5897	174	1	31.1185	188	1	25.3974	156
845	RM11510	CCGACGACCGTAGATCTGAGAGAGG	CTACATGTCCCTGGCCCTGAAACC	1	29.6196	244	1	31.1484	258	1	25.4283	232
846	RM11511	CTATACATCGCCGGAGCCATCC	CAGGAACCCGTCCAGTATCAGG	1	29.6269	166	1	31.1557	167	1	25.4361	158
847	RM11512	TGTGGCAGAAGAACCAATAGGG	CCAGCGAAGGCATTAGAGAGC	1	29.6924	139	1	31.2303	143	1	25.4899	137
848	RM11516	GTGCAGTAGATAGTACACCTTTGAGC	GAACGAGTGAGAAGGATACAGTGG	1	29.7395	457	1	31.2728	451	1	25.5358	451
849	RM11520	TACCTGTGGTGGTGTGCGTCTCC	TCGTACCTCCCGTCGTCACAGC	1	29.7755	478	1	31.3093	478	1	25.5714	478
850	RM11521	CAATGGCATACGGAGTAGTGTATAGG	AGCCAAAGCAGAGTTTCATAGCC	1	29.7813	176	1	31.3151	173	1	25.5773	161
851	RM11522	TAACTGCAGTGCTCAACAAAGG	CTAGGTACCGGATTAAGATTCACC	1	29.8276	375	1	31.3266	334	1	25.6108	351
852	RM11528	CTGGAATACCAAGCTCAAGAAGAAGG	ATCACTCGAGCACTCTCGTTGG	1	30.0065	682	1	31.5255	682	1	25.7929	682
853	RM11529	ATGGATCGCGACATCCACTAGC	GGCAAAGTTGACAACACGTACCC	1	30.0152	99	1	31.5341	95	1	25.8016	85
854	RM11530	GTGTGTTTGAACTGGACATTCG	GTTTGAAAGAGCCGAAGATACG	1	30.031	491	1	31.5497	450	1	25.8175	474
855	RM11531	TCTCATCCCATCCTCTTCCTCACC	CGGTGGCAGAACCAACAAGAGG	1	30.0575	124	1	31.5776	113	1	25.844	135
856	RM11532	GCAGCTCAAATAGCAAGAGTCTATGG	GCATATGTCCCACAGCTATTACGG	1	30.0712	348	1	31.59	352	1	25.8581	302
857	AUT11533	GCGAAGCCCAATCTGAAGAAGC	CCAGTCCCAGAATGTCGTTTCG	1	30.0963	166	1	31.621	162	1	25.8827	164
858	RM11535	AGTACGAGCTCCTCCCGCTTCG	TCCACCTCCTCCTCCTTCCTCTCC	1	30.1259	333	1	31.6505	324	1	25.9121	333
859	RM11537	ACAGCATGGGTAGCAGTGTGC	CAAATGGCGAGGATTGAGAGC	1	30.1339	178	1	31.6585	135	1	25.9199	149
860	RM11538	ACAGCATGGGTAGCAGTGTGC	CAAATGGCGAGGATTGAGAGC	1	30.1339	178	1	31.6585	135	1	25.9199	149
861	RM11539	GCACACTTTGATAGCCCTGATCC	CCAACTCTACGCATGCTCTCTTAGG	1	30.1546	264	1	31.6846	285	1	25.94	302
862	RM11540	GAAGCTCATGGGCCACATCAAGG	GCGCTTCCGCTCTCTAAGGTTCC	1	30.1883	195	1	31.7192	199	1	25.9753	201
863	RM11542	CTCTGCGAATACGTGAGCTTTCC	CCTACCAACGAACCCTAGCAACC	1	30.3121	138	1	31.8552	137	1	26.0954	135
864	RM11543	GCTCGATGTACTCGTAGCTCAGG	CAGCATCATACTCACACAGTTCG	1	30.3234	157	1	31.8772	157	1	26.1065	157
865	RM11544	CTCTCGCTCTCTGTCTCACTCTTCC	CAGTTGCCTCAAGATGCCTTGC	1	30.3576	334	1	31.9113	293	1	26.1413	326
866	AUT11545	AACGCAGTGCAAGTTGTATAGTGC	TCAGTACGTCCGGTCTGAAAGC	1	30.369	178	1	31.9228	158	1	26.1531	160
867	AUT11546	TGTTCCTGTGCTTGTGTCCTTTGC	GGCTCAACAGCCACACAGATGC	1	30.3712	96	1	31.9249	132	1	26.1552	94
868	AUT11550	GACAAGACAAACTGAGCAAACTCG	GGTGAACGTCCTGTCTGTAGTGC	1	30.447	198	1	32.009	182	1	26.23	200
869	AUT11551	GACAAGACAAACTGAGCAAACTCG	GGTGAACGTCCTGTCTGTAGTGC	1	30.447	198	1	32.009	182	1	26.23	200
870	RM11553	TCCGTCATAACTGACGCTGATCC	GAGGAGGAGCAGGAACGAGAGC	1	30.5022	538	1	32.0592	538	1	26.2713	528
871	RM11554	AGGACTTAGGGTACGTTTGAATCTCC	GACGATGATTGTCTCCTAAGTCTGC	1	30.5164	318	1	32.0735	283	1	26.2859	270
872	AUT11555	GGAAGGAAGGCCTATGTGTCTCC	GCTCATTTGCTCCCTCCTTTCC	1	30.6598	190	1	32.2024	168	1	26.4099	180
873	RM11556	GTCCGTACCAAACATTTGACTTGC	ACATGAACCGAACTACCGAACG	1	30.6751	167	1	32.2184	167	1	26.4248	167
874	RGNMS297	TGATTAAAGTTGTGAAGGTGAA	TATAAATCAACGCATCCAAATA	1	30.7125	270	1	32.2592	268	1	26.4625	270
875	RM11558	GCGCTGTTTGTGCTTGTCTACG	CGGCACACGAATTACTAAGAAGTGC	1	30.7127	92	1	32.2593	90	1	26.4626	92
876	AUT11559	AACGTAGACGGATGAGCAGAAGC	AATGCACGTCAGTATGCGTTCG	1	30.72	265	1	32.2668	292	1	26.47	252
877	RM11562	TGCACTGACCTAGTTCGATATTGC	CATTCGAGAGATGCAACAACACC	1	30.9103	182	1	32.424	186	1	26.6421	183
878	RGNMS298	GACCTAGTTCGATATTGCTGAT	GGTATATGTTCTCGTTTGGTTT	1	30.9103	239	1	32.424	243	1	26.6421	240
879	RM11566	TTACGTTGTGAAGAGACCTAGC	TACATCACTGAGAGTTGGTTGG	1	31.0045	403	1	32.5101	444	1	26.7922	399
880	RM11569	CGCGAAATCTAGCGAAACAAAGG	GAACAGGCCGAGGAGGAAGAGG	1	31.0382	162	1	32.5362	162	1	26.8232	162
881	AUT11570	TGGGCCTCTTTGTTTCATACTCC	TCCTCATCTCTCTCCGTGTCTCC	1	31.0404	391	1	32.5385	334	1	26.8254	355
882	RM8126	TGGGCCTCTTTGTTTCATACTCC	TCCTCATCTCTCTCCGTGTCTCC	1	31.0404	391	1	32.5385	334	1	26.8254	355
883	RGP126	CTCCCCTCTCTTCTCATCTCTCTCCT	TTGGTAATATGGGCGGCTGTTTTA	1	31.0408	229	1	32.5387	172	1	26.8257	175
884	AUT11571	ACGGGAAAGATAAAGGTGATCC	TGCAGCACACATTACAGTCACC	1	31.0507	96	1	32.5541	88	1	26.8359	100
885	RM11573	CCAGGCAGACAGACTGTGAAACC	GCCATGATCGAATCGAGAAACG	1	31.0826	164	1	32.5862	154	1	26.8678	170
886	RM11579	ACCTATGACTCCTCGACCATACC	ACAGAGTGGAATGGATGAAACC	1	31.1513	526	1	32.6298	647	1	26.9126	518
887	RM11581	CAAGAAACCGCGAGCCATTCC	CGATGGCGGTCTTGGAGAAGG	1	31.2146	348	1	32.6858	349	1	26.9685	313
888	AUT11582	GAGACCTGCCTCCCTCTACACG	GAGAGATGTACGGACGAATGAAGG	1	31.2349	180	1	32.7078	176	1	26.9888	176
889	AUT11583	CCAGCCCATTTCAGTCCATTTCC	GACGGACTGCAGGTTGGACACG	1	31.235	255	1	32.7079	251	1	26.9888	243
890	RM11584	CTAGTCTCTAGCCCATCCCTACC	TCAGGTCAATCAGTTCACTTCC	1	31.2423	254	1	32.7153	254	1	26.9962	258
891	RM11585	CTAGTCTCTAGCCCATCCCTACC	TCAGGTCAATCAGTTCACTTCC	1	31.2423	254	1	32.7153	254	1	26.9962	258
892	AUT11587	CTAATCTGACTGGAAACCCAGATCG	GAGCGGAGGAGCTATAGGATCG	1	31.2926	169	1	32.7629	163	1	27.0405	163
893	RM11589	CGTTCGGATTGTAAACTCCTTCC	CAACGATGGCCCAGTAAATATCC	1	31.3043	584	1	32.7748	583	1	27.0523	603
894	RM11593	TGTGGAGGAGATGAGAGGAGAGG	AACCTAGCGGGTGAGATTTATCG	1	31.3623	172	1	32.8451	170	1	27.1166	194
895	RM11594	CCATGGACTATCGGGAGTTAGG	CTGATTTGATCCGTTTCTCACG	1	31.3788	311	1	32.8607	356	1	27.1378	356
896	RM11597	GTATTTATTGTGGGCGGCAAACC	CGTTTGCTAGTTCAGTGTTGTGTCG	1	31.3911	403	1	32.869	261	1	27.1463	347
897	RM11598	AAACTCGAAACGGGAAGAGTCG	AGGGAGGAAGAGGAGGAATTGG	1	31.3936	394	1	32.8714	399	1	27.1488	396
898	RM11599	CGAAACGGGAAGAGTCGAGACG	TCGAGGTGGAGGGAGGAAGAGG	1	31.3936	398	1	32.8714	403	1	27.1488	400
899	RM11600	CGCCTGGAGAGAAGAGGAGAGG	GAGTCGAGTCTGGTTGGCTTCC	1	31.4312	66	1	32.9089	66	1	27.1861	63
900	RM11601	GGTGGGAAGCCAACCAGACTCG	GGGTTTACCTGCGCTAACCCAAGC	1	31.4312	388	1	32.9089	386	1	27.1861	403
901	RGNMS268b	TGTAAGGAATTTAACCAAACAAC	TATAAGCAACCACGAACTATACAT	1	31.4893	398	1	32.9426	398	1	27.2388	397
902	AUT11605	TCAACAAGGCACCAAACACTACG	GAGTCTTAGAGGCCGGATTTGG	1	31.5625	176	1	33.0402	182	1	27.3118	582
903	AUT11606	AATGGGAGGGCAAGATGAACG	GTCGCAAGTGATGGTGACTCG	1	31.5635	291	1	33.0413	283	1	27.3132	283
904	AUT11607	AAGGAAGCAGAAGCAGGTGAGC	GACCTGATGTTGAGCCATTTCC	1	31.5863	186	1	33.0627	198	1	27.3381	180
905	RM11609	GGTTGGTGAGAGCGACAGGTACG	CTTAGCTCGGTTCGTCGGTTGC	1	31.6749	381	1	33.1466	385	1	27.4229	381
906	AUT11614	GACCTCGACTCCTACTCCGACTCC	CCTCGTCCTCAAGTGCCTCTCC	1	31.7514	162	1	33.2227	162	1	27.5009	153
907	AUT11615	TGCTCTTATACCGTTCACATCC	TCAAACTAACCCTTCTGAGAGC	1	31.8496	288	1	33.3225	285	1	27.5955	274
908	RM11617	GCCCACACTATAGAGCAACTGAGC	TGTTCACGGATGAAGAGAAGAGG	1	31.9198	212	1	33.3912	212	1	27.6617	212
909	RM11618	CTGTTCCTGGGAGCTGGAGAGG	CACTTAAGAAGGAGGTGGCGAAGG	1	31.9248	187	1	33.3962	185	1	27.6663	191
910	RM11619	CTGTTCCTGGGAGCTGGAGAGG	CACTTAAGAAGGAGGTGGCGAAGG	1	31.9248	187	1	33.3962	185	1	27.6663	191
911	RGNMS118a	CATATGTGCACTTAGCTTACACTT	ACAAATGACATTATTTCGAGACTT	1	31.9294	215	1	33.4008	215	1	27.671	215
912	RGNMS139	TTGTAAACTGCATGAAGACTCTAT	CCACATGTCATTTCTTTATTCTAA	1	31.9319	374	1	33.4037	375	1	27.6735	374
913	RGNMS1329	AAATTATATTGAACCATGACTGTG	GCAGAAGAGTACTTAGGAGCTTT	1	31.9339	282	1	33.4055	260	1	27.6754	258
914	RGNMS259	AAATTATATTGAACCATGACTGTG	GCAGAAGAGTACTTAGGAGCTTT	1	31.9339	282	1	33.4055	260	1	27.6754	258
915	AUT11621	CAACACCTGAATCGTGTGACAGC	GATGTACAGCACCGACCACACC	1	31.9345	183	1	33.4062	163	1	27.676	179
916	RM11623	GGAGTGGAGTGCTTTGCTCTGC	CGACACGACGAAGCAGGAAGG	1	32.014	459	1	33.4828	447	1	27.7663	432
917	RM11624	ACGTACACCCTGCAGTCCTTGC	CTACGCCGGCTACGTCAAGTCC	1	32.0197	286	1	33.4885	280	1	27.772	280
918	AUT11625	GCAAAGATGGCGCAATTTATAGGC	GCACGTGATGAGCTCCGTTTCC	1	32.0203	137	1	33.489	140	1	27.7726	137
919	RGNMS1343	ATGACCGGCTTCATCGAGAGCTA	TTAACCACAACTTGCATTATATTT	1	32.0971	266	1	33.5714	266	1	27.8466	266
920	RGNMS269	ATGACCGGCTTCATCGAGAGCTA	TTAACCACAACTTGCATTATATTT	1	32.0971	266	1	33.5714	266	1	27.8466	266
921	RGNMS1352b	GTGGTGTCTGGCCTAGAGATGG	GATCTGAAGAAGGAATAAGTTCAT	1	32.1081	348	1	33.591	355	1	27.8599	350
922	RGNMS1380	AGTACATTATTGCATTAGCCACTA	AAGATCCTTATCAGTCTAACCATC	1	32.1117	299	1	33.5965	299	1	27.8635	299
923	RGNMS311	AGTACATTATTGCATTAGCCACTA	AAGATCCTTATCAGTCTAACCATC	1	32.1117	299	1	33.5965	299	1	27.8635	299
924	RM11628	AGTCTTTCATCTGACCGAGCAAGC	GAAGATCCCGGAGGCGTTAGG	1	32.2312	269	1	33.704	269	1	27.9653	272
925	RM11629	ACATTGGAAGAGGGAGTCAAACG	CCCAAATTCTGAGCATTGTCTGC	1	32.2358	299	1	33.7098	265	1	27.9699	287
926	RM11632	GTTCCAAGACGATGATTCTACTCC	CGTACTAGCTTTGTTCCCATGC	1	32.28	199	1	33.7528	195	1	28.0137	195
927	RGNMS434	AACAAGATATTGTCATTGAAGATG	GTTAAACACAGTCAACAAGCTTAC	1	32.2825	246	1	33.7552	246	1	28.0161	246
928	RM11633	CCTCCTGGACGAATGAGATAGACC	AGCCTGTGCTTCAGCTTCTTGC	1	32.2987	167	1	33.7714	163	1	28.0323	167
929	RM11634	CGCACGAACAAGACAGAGTCACG	GTGAGCCGCCTCTCCATCTTCC	1	32.2987	396	1	33.7715	393	1	28.0324	396
930	RM11635	TTGTCACCCTTACTAGGATCAGC	GTGTGACTCTTGATGTAACTCAGC	1	32.3071	293	1	33.7799	288	1	28.0408	301
931	RM11642	AGCTCAATCTTTGCCTCGTCAGG	AACACCGCCTATGCATGTACTCC	1	32.3457	181	1	33.8121	181	1	28.0755	181
932	RM11646	GAACACTTGTTTGTGGCGAGAATGG	CAAGCGTATGCTCCCACACTCC	1	32.4715	436	1	23.1402	346	1	28.182	392
933	AUT11648	TGATTTCTTGGAAGCGAAGAGTGAGG	CCTCCTTGTGCTCAGCCATGC	1	32.4946	94	1	33.9376	87	1	28.2048	90
934	RM128	TGATTTCTTGGAAGCGAAGAGTGAGG	CCTCCTTGTGCTCAGCCATGC	1	32.4946	94	1	33.9376	87	1	28.2048	90
935	AUT11654	CCCATTCAGTTGATCCTGTCTGC	AGCTGGGATGCAGAAGAGTATGG	1	32.6808	158	1	34.1116	172	1	28.3801	170
936	RM11655	CTGCATACTGTTCAGTGATGTTCACC	GCAGAGAGATGGCAAGAGAAACC	1	32.7141	90	1	34.1582	104	1	28.4133	114
937	AUT11656	AGCCATTTCCAGCAGTTCATGC	CCAGTTTCAAGGCTCGGAAGC	1	32.736	181	1	34.1802	169	1	28.4355	177
938	RM11657	TATTCCACTGATATGCCGGATGG	AAATCATCCGCGCTCTTCTTGC	1	32.7883	371	1	34.2242	344	1	28.4782	355
939	RM11659	CTTCTTCTCTCCGCCGCCTTCC	GTGTTTGGCGGAGGAATCTGAGG	1	32.8715	288	1	34.3249	288	1	28.5644	288
940	RM11662	TTCTGGCTATTGGTTAGCTTCTCC	CTTTGCTTCCGTCCATGTTTACC	1	33.0092	97	1	34.433	96	1	28.6777	96
941	AUT11664	TTATGGACTTGTGGGTGTCATGG	AAAGGCGATGAGTCAACATCTGC	1	33.1201	255	1	34.5474	295	1	28.794	245
942	AUT11667	GCTGTCACTGACCGAGCGTAGG	TCGAGAGATCCAATCCAGTTTGC	1	33.1667	189	1	34.5974	179	1	28.843	199
943	RM8097	GCTGTCACTGACCGAGCGTAGG	TCGAGAGATCCAATCCAGTTTGC	1	33.1667	189	1	34.5974	179	1	28.843	199
944	RM11668	AGTGTCTCTGGAGTTGGGAGTGG	CTGTTCTTCCAGATGGGCTTCC	1	33.1795	168	1	34.6122	156	1	28.8555	160
945	RM11669	AAACCGTTCCAGGGAGACTGACC	TCGTCTGATCCATCCATCCATCC	1	33.2093	168	1	34.6416	156	1	28.8725	168
946	RM11670	AGAGGAGGCATGGTGAGTTTGC	AGCAGAGGAAGAAGCTGCAGAGC	1	33.2483	183	1	34.6702	183	1	28.8986	189
947	RM11672	CAGTTCGGATTCGCTGAAATACC	TTCGCCCAAATACCACTATACAGC	1	33.2626	557	1	34.6842	543	1	28.9138	761
948	AUT11673	TGTGATAAGGGATGCACTTGAGC	CAAGATCTCCACATTTGACTCACG	1	33.2662	209	1	34.6874	197	1	28.9172	266
949	RM11675	CTCGCTGGACATGGTCCTCTTCG	GGAAGTTGAGCAGCGCCTTGG	1	33.3239	376	1	34.7436	376	1	28.9717	376
950	RM11676	TCTCCTTCTCCGGTCGGTTTCC	CCAAGGAGAGGGAGTCCAGAGC	1	33.355	386	1	34.7747	383	1	29.0028	386
951	RM11677	GTCTTGGAGCTGAGCACCTTGG	GGCCCTCCGTGTAATCCTATTCC	1	33.3961	180	1	34.8437	174	1	29.0417	174
952	RM11679	GACGAGCTAGCGAAACGGAGAGG	AGCAGCTGAGCCAAGCTGAGACG	1	33.4064	94	1	34.8534	94	1	29.0517	94
953	AUT11682	TTGGAACGAGAGCTTAGCTAGATGG	CATGCCTCCTTGAATCCAGAGC	1	33.4637	361	1	34.9265	355	1	29.1089	358
954	AUT11683	TTACAGTCAAGGTCTCGCTCTCG	TCGGAAGACCACTCACTCTCTCC	1	33.4688	189	1	34.9316	189	1	29.1139	189
955	AUT11684	GGAGCTTGAGTTAAGACTGGTTGG	CTTCCCTCTCGTTCAAATCAATCC	1	33.4757	152	1	34.9385	152	1	29.1208	158
956	RM11685	GTCTCTCGGGTCGCAGATCACG	CCATACGGGCCACACACGTACC	1	33.5013	90	1	34.9641	90	1	29.147	90
957	RM11686	TCCAGCACCATCATATGTATCTAGGG	GATGCAAGTGGGACGGATAAGC	1	33.5132	230	1	34.9786	242	1	29.1579	226
958	RM11689	GCCGCTCTGATGAAATGGAAAGC	GCTCGCATGGTTGGGACTTGG	1	33.6053	176	1	35.0956	176	1	29.2528	176
959	RM11691	GAAGTAGCAGAACTTGGTGTCACG	CTGCTTGCCTACCTTCCTCTCC	1	33.607	441	1	35.0973	438	1	29.2545	438
960	RM11694	GCGTCTATGCGTATCTTCATCTTACC	CAACTCTGCTAGTGTGCCTCTGC	1	33.6538	193	1	35.155	171	1	29.3017	157
961	AUT11698	ATCAGCATCCCAAAGCTAGAACC	AACCGTATATTGAGGGAGCAAGC	1	33.7043	122	1	35.2351	108	1	29.3627	112
962	RM11699	CGTGTCTGATCACAATCATCTGC	CATGGTCTGAAGGAACCTCTGC	1	33.7329	75	1	35.2587	73	1	29.4038	77
963	AUT11700	GCTCCTCTTATTCCCTCCTCTCTCG	GAACACCTCCCGATCGTGAACC	1	33.7821	219	1	35.3094	221	1	29.4533	219
964	RM11701	CTGGTGGAGTTGCAGTGCCTCTAGC	CCTTGCTGCTTTCTCATTGAAACTGG	1	33.7835	233	1	35.3108	225	1	29.4547	229
965	AUT11704	ACAGGGCTATGCAGACACAGTGC	AGCAAGCGAAGGGAAGTGACC	1	33.8565	240	1	35.4074	172	1	29.5206	188
966	AUT11705	ACATCGCATGCAGACTGATTAGC	CCAATGGAACAGTGACACAAGC	1	33.8641	177	1	35.415	173	1	29.5282	173
967	RM11706	CTTTGACCAGGACAATCTAGC	CTATTATACCGTGAGGTGTGTACC	1	33.8936	214	1	35.4445	220	1	29.558	211
968	RM11709	CAGCCCGGCAGTCTATATTTCG	ACTGACGACGGGCTAGTGTTCC	1	33.9762	225	1	35.5342	193	1	29.6313	239
969	RGNMS341	ACTATGTGAGATGGAGTGTGTG	GTGTTAAACAAAGCACAGCTAA	1	34.015	180	1	35.573	172	1	29.6704	180
970	RM11712	CTGAGAATGTCCCATCAGAAAGC	GATCTGCATTCTATGCTGCAACG	1	34.0532	792	1	35.6169	664	1	29.7065	723
971	RM11714	GGACCGCTACAGTATTTCGCTACC	TCATCAGAGTGGGAAGAAGAGAGG	1	34.0547	229	1	35.6183	226	1	29.7079	226
972	RM11718	CGTACCTCTCGAACGGGTCTAGC	CACCACCTCCACGCTACTACTCC	1	34.1241	154	1	35.6899	184	1	29.7743	151
973	RM11720	GAGCGTGGACAAGCTTGAGAGC	GTTGGCTGCCTTAGGATGTAAACC	1	34.1287	335	1	35.6945	350	1	29.7788	356
974	RM11722	CAGGACATGAAGTTCTCATGAACG	CTAACTAGCCGCCTCTTGTCAGC	1	34.2006	154	1	35.7513	160	1	29.8544	152
975	RM11723	GCTAGTAGCTAGCTGCCCTCTTCG	TGGTCCATTCTCGTATCCTGACC	1	34.2034	87	1	35.7541	87	1	29.8572	87
976	RM11724	CCTCGACCTGGAGAGGTTTGG	TGGCTTCATGAGGATGCTAGTGG	1	34.2072	93	1	35.7582	93	1	29.8611	93
977	AUT11726	CCAATCCTTTCCAAATCCAACG	GCCAAATATCTAGCCTCCTATTGAGC	1	34.305	158	1	35.8528	155	1	29.9497	158
978	RM11727	GCGATTATTGCTGCATGAAACC	CATTAGAACCTGGAGCATGAGTTAGC	1	34.3659	285	1	35.9047	283	1	30.0087	285
979	RM11728	CTCCTCATGTTCCCACGACTACG	TCCGAAGACAAGGAAGAAGGTAGC	1	34.4056	249	1	35.9444	243	1	30.0484	246
980	RM11729	CGAATAACCTACCAAAGTACCG	TAATTGCTGCAGCTAGGATAGG	1	34.4412	439	1	35.9798	482	1	30.0839	401
981	RM11730	ACGATGTCTTGGCATCCCTTCC	CGCTAAGTTCCATGCTCAGTTGC	1	34.481	85	1	36.0193	77	1	30.1236	85
982	RM11733	AGTCACACTATAGAGGGCTTGATTGG	CACCCGTATCAAGTTGCAAATCC	1	34.5505	145	1	36.0792	123	1	30.1902	543
983	RM11734	CAGGAGACCACCATTTAGTTTGTAGG	GGCAGGTTGAAGGCAATAGACC	1	34.6119	164	1	36.1661	160	1	30.2488	164
984	RM11736	CCATAGGACACATTTACACAGAGG	GCTTCTGCAGTCTATTGTTGACC	1	34.6781	283	1	36.2254	279	1	30.3087	281
985	RM11738	AGGCTCATGCGAGATTATCTGACC	AAATGGTCTTCAGTGCTCCAGTTCG	1	34.6843	296	1	36.2313	198	1	30.315	250
986	RM11740	ATCTCGACTCGCACACAACTCC	ACTTCGGTTAATCACTGTGAGTGAGG	1	34.74	395	1	36.3279	457	1	30.3712	395
987	RM302	tcatgtcatctaccatcacac	atggagaagatggaatacttgc	1	34.7442	123	1	36.4	119	1	30.3755	119
988	RM302	TGCAGGTAGAAACTTGAAGC	AGTGGATGTTAGGTGTAACAGG	1	34.7442	123	1	36.4	119	1	30.3755	119
989	AUT11742	AAGGAACGCGAGAGAAGAGAACC	ATTCTGAGCAGGAGAAGGGAAGG	1	34.8065	296	1	36.4501	292	1	30.4239	300
990	AUT11743	AAGGTCAAGGAAACAGGGACTGG	AGCCACGAATTCCACTTTCAGC	1	34.8104	161	1	36.454	159	1	30.4278	159
991	RM11744	CCACCCGTATAGGACCAGTCG	TAGAGTCTCCAGGCAGTCTCACC	1	34.919	148	1	36.5417	145	1	30.4981	148
992	RM11747	CCATGGCATGCTATATTGGAAGG	GGTTGGAGAATAGAGAGGAGGTAACG	1	35.0006	187	1	36.6396	185	1	30.5782	211
993	RM11748	TGTCAGCAATGATACTGTGAGTCC	TTTCACATGCCTACTGGACAGC	1	35.0037	179	1	36.6426	174	1	30.5812	181
994	RM11750	ACCGTGCTTTAGTTATCCACCATCC	TTTGTGGCTAGTGCGAGTTGG	1	35.0425	91	1	36.6846	84	1	30.6223	91
995	RM11762	AAGCGACAACTGAAGGAAACTCG	TTTGAAAGTCCACTGCCAAGTGC	1	35.4146	160	1	37.0622	186	1	30.9251	162
996	RM11767	ATAGCTGTTTGAACGCCATGC	GGCCCATAATCAATCACAAGAGC	1	35.6334	442	1	37.2774	437	1	31.172	467
997	RM11768	ATAGCTGTTTGAACGCCATGC	GGCCCATAATCAATCACAAGAGC	1	35.6334	442	1	37.2774	437	1	31.172	467
998	OSR3	agctaaggtctgggagaaacc	aagtaggatggggcacaagctc	1	35.7898	273	1	37.454	254	1	31.3132	225
999	RM11782	GGAGTGTTTGTAGGACTGACACG	ACATTACCCGAATCAGGATAGG	1	35.9295	179	1	37.5588	183	1	31.44	179
1000	RM11784	CTACGGCCCATAGCAATCAACG	TTCCGTCGACGTCTTAATCATGG	1	35.9457	90	1	37.5751	94	1	31.4565	90
1001	RM11790	GCAAAGCACCCAAACCAAACC	GAAGAGGAGGAACACGAGGAAGG	1	36.1348	227	1	37.7835	224	1	31.6132	227
1002	RM11794	AGGGAGAGAGGAGGAGGGAGTAGG	GCTAAACACACCAGCGTCTTGG	1	36.2455	179	1	37.9106	182	1	31.7217	185
1003	RM11795	GATCTGCGCGTTAGTGTGATTCG	GAGGCGAGAAACGCACAGTGG	1	36.2624	187	1	37.9287	187	1	31.7386	187
1004	AUT11796	ACTTGTCTGTGTCACTAACCATGC	GATACATGGCGTCTCAACTACACC	1	36.2651	178	1	37.9314	172	1	31.7413	175
1005	AUT11797	GCTTTCCTCTCCTCTCCTCTCC	CAAATCAGTGTCGTATGCAGTGG	1	36.2709	199	1	37.9372	178	1	31.7471	202
1006	AUT11798	GTTGGCGTACGTAGAGAGGAGTACG	CTTCATTGTCGCTGCCAGAGC	1	36.3048	154	1	37.9705	146	1	31.7805	136
1007	RM11799	CCGTAGTATGTTACGGACATGAGG	TGTTATGGCAGAGTGGTAGATGC	1	36.3172	196	1	37.9828	198	1	31.7933	220
1008	RM11800	GTCTGTTGTCTTTGTTGCCAAGG	CTTCCTGTGCTTACTCTTCTTCTTGC	1	36.3306	224	1	37.9963	227	1	31.8089	224
1009	RM11801	GACGACGTCGAGAGCCTCTTCC	AGCTGGCTAGCTGCAGTTTCACC	1	36.3333	283	1	37.999	274	1	31.8115	286
1010	AUT11802	ATGCACCACCAGCAGCTCAAACC	CGGATGAGGGAGTTGTAGCAGAAGG	1	36.3922	298	1	38.1032	289	1	31.8665	295
1011	AUT11805	ATGACACACCACCACCACCAACG	GGAAGCGCAGCATCAACAAAGG	1	36.4502	71	1	38.1649	65	1	31.9252	71
1012	RM11807	CTACGTTTGGATCGGAGGAGAGG	CCCTTCTATTTCGCTTCCATTTCC	1	36.4783	114	1	38.1931	113	1	31.9536	115
1013	RM11808	TCTGCAGCTTCTTGAGTTCTTCC	ATCAGTGCAGGCTTTAGGTTTGC	1	36.526	263	1	38.2341	251	1	31.9907	281
1014	RGNMS376	GAATATCTGTTTCGCCAGATT	ATTGGGAAAGTTGTGTTCTTT	1	36.6189	154	1	38.3198	136	1	32.0732	150
1015	RM11812	CAAATCACCCACTGTAAAGACC	CCGGTGTAAATTAGCTGTATGG	1	36.6244	109	1	38.3253	109	1	32.0782	117
1016	RM11814	TCCAGACTTACCGCCTATTCTAATCC	AGAGGAGGGAAGAAGAGGAATGC	1	36.644	246	1	38.3448	248	1	32.0978	246
1017	AUT11815	GCGCCCAATGCATGTAAATTCC	TGCCGATACCTGTGATCAAGTCC	1	36.6578	288	1	38.3587	263	1	32.1117	272
1018	RM11817	CGACAAGTGCTCGGAGATACTGC	AGCTCAGTGTTGCTCTCCGTACC	1	36.7015	354	1	38.3986	345	1	32.1454	354
1019	AUT11818	GCTTGCATTATGCGATTGTACTCC	TGAGCTTTCTCAACAACGACTGC	1	36.7125	130	1	38.4096	136	1	32.1564	173
1020	RM315	GAGGTACTTCCTCCGTTTCAC	AGTCAGCTCACTGTGCAGTG	1	36.7352	137	1	38.4237	129	1	32.1723	559
1021	AUT11819	CTGCCTCCTCCATTTCCCACTCC	CGAACGACTGCTCCCTCTTCAGC	1	36.7525	165	1	38.4497	173	1	32.1993	553
1022	RM11820	CACCGAGACAGTGAGACGTACAGC	TATCGGTAGGCCGTTGGATTCG	1	36.7886	268	1	38.4759	268	1	32.2229	268
1023	RM11821	TTCCGTCGTACGAGTTGCTGTCC	GCTGCACGTCGTCGTCTACACC	1	36.789	484	1	38.4763	478	1	32.2233	484
1024	RM11824	GTACTGCAAATCTAGATGGACTGG	TAGCTATTCATCTGCCACAAGC	1	36.9967	116	1	38.6805	112	1	32.4248	108
1025	RM11825	GAGTCCTGCAAGAAGCCAAGC	CATCTCCGATGATCTCTCCAAGC	1	37.0038	90	1	38.6889	90	1	32.432	81
1026	RM11828	TTCTGCAGATGCACAATGAAGC	GACAATGTTGAGGCTCCTAAAGAGG	1	37.0714	190	1	38.7333	187	1	32.4718	187
1027	RM11839	ACTCTTGTCTCTGTGGCTCTCTGG	CACCTTGGGCAGAGTGAAGAGG	1	37.3487	164	1	39.0059	161	1	32.7214	161
1028	RM11840	GTGGGAGTACTGATCAAATCG	GACAATCAGTACACTGTTCTCAGG	1	37.3934	629	1	39.051	694	1	32.7693	638
1029	RM11841	AACTTGCACACCGCACAACTCC	TGCTGTATGGCCATGTGGATGC	1	37.4008	366	1	39.0585	802	1	32.7767	294
1030	RM11843	ACGCAGAATTGATTCGCTCTCG	AGAGGAAGAGGAGGGAACGAACG	1	37.4693	212	1	39.1153	223	1	32.8334	203
1031	AUT11844	TGTGCTATTGCGCGAGATTATCC	CATCACCGCTCCAACTCATGC	1	37.4892	243	1	39.1703	237	1	32.8535	247
1032	RM11847	TCTTCATTGCATTGCTGCTACG	AACCAACCGTACTGTTTCTTCTCC	1	37.5259	278	1	39.2042	282	1	32.8893	282
1033	AUT11849	CCGAGTTGTATTACTGGTGCAAGG	CTTTGCTCCAAACCTCAGTCTCC	1	37.5943	224	1	39.2712	238	1	32.9583	238
1034	RM11851	AGTAGGCAAGCCTCAATCGATCC	GACGTACCAATCTGATGTACGAAGC	1	37.6681	150	1	39.3488	150	1	33.0345	150
1035	RM11859	GTGGCGGTTTCGCTGTGTTAGG	CCATCTAACGGCACAAGCACATCC	1	37.879	70	1	39.5448	73	1	33.2379	70
1036	RM472	CCATGGCCTGAGAGAGAGAG	AGCTAAATGGCCATACGGTG	1	37.8901	276	1	39.5514	287	1	33.2506	277
1037	RM11860	GTGATAGCAGATGAGCAGCATGG	AGTAACAGCTGCCACAACTTTGC	1	37.9104	131	1	39.577	149	1	33.27	146
1038	RM11861	GTCACCATGCTCTTGGTGTTGC	CAGGGCATCACTAGGCACTACG	1	37.9244	179	1	39.5908	171	1	33.284	171
1039	RM11865	CAACTCATTCGGCTTCTCTTTCC	GCAATTGCATGAGTTGGAATGG	1	38.0218	394	1	39.7345	235	1	33.3798	295
1040	RM11866	AGGCTGACGTTGTGGTGGAACC	ACCCAAATCCAAGCATCCATCC	1	38.0252	263	1	39.7378	260	1	33.3831	263
1041	RM11867	AGGCTGACGTTGTGGTGGAACC	ACCCAAATCCAAGCATCCATCC	1	38.0252	263	1	39.7378	260	1	33.3831	263
1042	RM11869	CAAATCTCGCAACAACACAGAGC	CATACCAGCCCAACCGAAACC	1	38.0543	172	1	39.767	212	1	33.4125	174
1043	RM11870	AGGTGATGCTAAGCCAGCACAGG	ACCTCCATCCGGATATTCACTGC	1	38.0545	421	1	39.7672	403	1	33.4128	676
1044	AUT11871	TTTCCGACTGAACAAGTACACAGC	GAGTGAGCAAGAACTGTCATCACC	1	38.1388	163	1	39.8531	165	1	33.4853	559
1045	RM11872	CATCCCAATCTGGCCTTGACTAAGC	TTCTCGGGAGGTGGAGGACAGG	1	38.1457	95	1	39.8601	101	1	33.4926	95
1046	RM11873	GCTGGTCCGTGCATGTTAGGG	CCATACTTTCGCTGCTTGATTCG	1	38.1842	179	1	39.9337	233	1	33.5311	194
1047	AUT11874	CCACTAGCAGATGATCACAGACG	GAGCACCTCATAAGGGTTTCAGC	1	38.2271	192	1	39.9923	170	1	33.5735	178
1048	RM11875	GCGAAGACAGACAAAGGCAAGG	TCTGCCTTGTGATCGTCGAACC	1	38.256	191	1	40.0266	183	1	33.6025	183
1049	RM11876	GGGTGGAAGGAGGACAACTGC	CATCTGCTTGTTGGTTTGATAGCC	1	38.2643	152	1	40.038	124	1	33.6108	126
1050	RM11881	TCAAACGCAGTAACACTTGACG	CTTTCCTGTCTGTGAGAACAAGTAGG	1	38.3611	352	1	40.0782	352	1	33.688	352
1051	RM11885	ACACCCTTCATTTGCGTGTATGG	GGCACCTTCGACTTTGTAAATGC	1	38.4435	179	1	40.2212	221	1	33.766	191
1052	RM11893	AATTCGGTCACTCGCTGTCACG	CTGCGGACGAAATTGCTTAGCC	1	38.526	162	1	40.2886	160	1	33.838	156
1053	AUT11899	GTGATGGGAGAGCAGGAGAAGG	CGCAAGTGGACCTCTTATTGTGC	1	38.6905	174	1	40.4133	158	1	33.9393	154
1054	RM11900	CAATTTCCCTCCCAAATCTCTCC	GGGACTTACGATTCCGACATTGG	1	38.7087	253	1	40.4349	279	1	33.9583	241
1055	RM11901	TGACGGTTGAGATCTGTAATGC	CACTTCCAGGCCCATTTATATAGC	1	38.7126	198	1	40.4388	194	1	33.9622	194
1056	RM11903	GGGCATTTGTTGTGACTTGTACGG	GTTCGTTGCGTTGCGACTTGC	1	38.7766	612	1	40.5067	608	1	34.0241	627
1057	RM11904	AGCTTCTGAGCCATTGAGACAGG	CATCAACATTTGCAGCAACAGC	1	38.8763	253	1	40.6089	274	1	34.1568	292
1058	RM11905	TTTGCTGCGAGGAATGTTGTGG	CATACCATGCTCCTGCAATTTCG	1	38.8764	239	1	40.609	260	1	34.1568	278
1059	RM11906	GCTCGCTAAACACACTAGACATTTCC	CATAGGCAGATGAAGGCAACTCG	1	38.879	150	1	40.6127	150	1	34.1594	150
1060	RM11907	CTCACCAGGTCTTCAGTTTCACC	GCAAGTGAGTGTGATGCAGTGG	1	38.9147	185	1	40.6426	179	1	34.1931	187
1061	RM11909	CGTATACTGGTCCTGGTCCATGC	CACAGGAGGATATGGAGACACTGC	1	38.9476	109	1	40.684	105	1	34.2268	108
1062	RM11911	ACCAAGTCGAACTCTCCTCAACC	AACAGTCCGCATCGAGAATGG	1	38.9874	146	1	40.7121	146	1	34.2505	146
1063	RM11914	CGGTCGTATATCGGGTTCAGC	CCAATCTCTTGCTCACTCTCTGC	1	39.0327	294	1	40.7464	288	1	34.2816	294
1064	RM11915	GTGCCACGTAAATTGTGAATGC	TGCTAAGCAAAGCAGTGTTCTTCC	1	39.0636	487	1	40.7701	489	1	34.3225	495
1065	RM11917	AGAAGAGGTCAAGACAGGAAAGTAGG	TGCTGGATTGAGACACATTTGC	1	39.0886	225	1	40.7954	220	1	34.3473	197
1066	RM11918	AGAAGAGGTCAAGACAGGAAAGTAGG	TGCTGGATTGAGACACATTTGC	1	39.0886	225	1	40.7954	220	1	34.3473	197
1067	RM11919	CAAATGGTGAGAGCGAATGTGG	ATGTGTTGCAACGGAGTATGTGG	1	39.0983	426	1	40.8186	418	1	34.3567	407
1068	RM11920	CACTAGAGTTGAGCAGTTCTCTCAGG	AAACTATGGAGTCCCACATCTCTGC	1	39.1019	664	1	40.8222	538	1	34.3603	538
1069	RM11924	ATCTCGGTGCAAACTGTACATGG	CGCGTATTGTCTCTGTTGATTGG	1	39.2423	144	1	41.0423	144	1	34.497	144
1070	AUT11925	GGTGTTAGCATCGGCAGATAGGC	GTAACACGCGTGCGAAATGAGC	1	39.2796	264	1	41.0666	260	1	34.5213	262
1071	AUT11926	GCCTTCCCTTTCCTCTCTTCTCC	CACTCTCACAAACCCGAAGTGC	1	39.2918	185	1	41.0814	185	1	34.5336	185
1072	RM11927	GTGACCACAGCCTCGTCTTCC	GGAGGTCTGGAAGGAGATAACTGG	1	39.3152	188	1	41.1047	188	1	34.5569	188
1073	RM11928	TAAACCAGATCATGCCCTCATCC	AGCAGTAACGGTTGGGTACTTGG	1	39.3398	280	1	41.1327	240	1	34.5815	244
1074	RM11929	GCAAAGCAAAGAGCAGAAGTTGG	GAGATGTCGACGATGGTGTCG	1	39.348	280	1	41.1408	279	1	34.5896	327
1075	RM11930	CGACACCATCGTCGACATCTCC	ATGTGCTTCGACCTGGCAGACC	1	39.3482	176	1	41.1411	176	1	34.5899	176
1076	AUT11931	TCACTTGGTCCTCCACAAAGAGC	CATCTTGTTTCTCTCTCCATGTCTGC	1	39.3596	85	1	41.1523	71	1	34.6	85
1077	RM11932	CTACTCCCTTGAGCAGCTTCACC	TGGAATGTGGATACTCCCTCAGC	1	39.3696	668	1	41.1609	651	1	34.6094	654
1078	RM11935	AGCTGACGCCTGGACTATGAAGC	CACAGCCTAAGTCTCTGTCAACATCC	1	39.5412	162	1	41.3478	142	1	34.7777	156
1079	RM11941	GGGTTTGATTTCTTTGCGCTATGC	AGTGGGAGACTGTTGACAATTTAGGC	1	39.5963	284	1	41.435	464	1	34.8309	412
1080	RM11942	TATCCTCGTAGGAGCCAACTGC	AAGCCACTCCTATTGAAGTTACCC	1	39.6055	188	1	41.4444	192	1	34.8403	190
1081	RM11943	CTTGTTCGAGGACGAAGATAGGG	CCAGTTTACCAGGGTCGAAACC	1	39.6087	76	1	41.4476	68	1	34.8434	74
1082	RM11945	CCGAGCGAGTAGTTCATCTATGC	GCACACAACAACACAAACTGACG	1	39.6142	227	1	41.4531	265	1	34.849	234
1083	RM11946	GTCCACCTCACCGTCATAGTCG	AATCTCGTCCCTTCACTTACGTTCG	1	39.6237	299	1	41.469	296	1	34.8611	299
1084	RGNMS416	TGTGTATCATTTGTCGAATACC	GCTACAAAGGAGAGAATACAACT	1	39.646	358	1	41.4914	350	1	34.8806	340
1085	AUT11949	CATTGACGTGGCACTTTGTTCC	AGAGAGCACGCAATGGAGTATGC	1	39.6461	264	1	41.4916	256	1	34.8808	246
1086	RM11950	GAAACTCAACAAATCGCGAACG	CTAGGCCATTAGCCAAAGCATCC	1	39.6529	388	1	41.4984	373	1	34.8876	357
1087	RM11951	GAAACTCAACAAATCGCGAACG	CTAGGCCATTAGCCAAAGCATCC	1	39.6529	388	1	41.4984	373	1	34.8876	357
1088	RM11953	AGGCGAAGGAGGAGAAGAAGG	GATCAGCTGCTTGAACTCATCG	1	39.7051	163	1	41.5488	154	1	34.9388	151
1089	RM11954	GAAACGGAGTGAGTGCTACTGATAGG	CTGTCGCGTTCCAATTTATTAGCC	1	39.7094	157	1	41.5531	157	1	34.943	157
1090	AUT11956	ACTCACTCACTCACCCACACAGC	TTGGAGAGGGAAGAGAAGACACG	1	39.7655	183	1	41.6105	189	1	34.9998	180
1091	AUT11957	GTCGATGATGGTGGACGTCTCG	ATCACCTCCGGTGTGCTGTACC	1	39.7796	179	1	41.6245	176	1	35.0138	176
1092	AUT11958	ACGGACCGGCTGTCCTACTTCC	GTCACCTCCACCTCGTGAGTCG	1	39.7908	413	1	41.6358	405	1	35.0251	407
1093	AUT11959	GTCATGTCTCTCCCATCAGTTCC	CCATCTTCGTATAGAACTGGACATGC	1	39.8107	310	1	41.6579	310	1	35.0453	328
1094	RM11961	GTCGAATCGCGATAGTCAGAGC	GGTCAGTTTGGCACTTTGAATGG	1	39.9457	187	1	41.8111	179	1	35.1803	187
1095	AUT11962	GAGCAGCGTAAGATCTCCCTACC	CAAGCGAGCACATACATCAAAGC	1	39.9538	165	1	41.8194	144	1	35.1883	135
1096	RM8231	GAGCAGCGTAAGATCTCCCTACC	CAAGCGAGCACATACATCAAAGC	1	39.9538	165	1	41.8194	144	1	35.1883	135
1097	AUT11963	TATCGTGGAAATCCTACCAACC	CCACCACGTGTGTACTCCTACC	1	39.9594	98	1	41.825	86	1	35.194	90
1098	RM8232	TATCGTGGAAATCCTACCAACC	CCACCACGTGTGTACTCCTACC	1	39.9594	98	1	41.825	86	1	35.194	90
1099	AUT11966	CACTTGACGAAGATGAAGGATGG	GAGTGAACTCCTTTGATGGTTTGC	1	39.9776	298	1	41.8469	272	1	35.2119	229
1100	RM11968	CCAAGACATGAGGGAGATAATGG	TGGCTATATTGTGGGACAGAAGG	1	40.0504	440	1	41.9238	485	1	35.2808	456
1101	RM11969	CCAAGACATGAGGGAGATAATGG	TGGCTATATTGTGGGACAGAAGG	1	40.0504	440	1	41.9238	485	1	35.2808	456
1102	RM11977	CGACATGAACAGTGATGGTTATGG	TTTGCTAGAAGCTCCCTAAAGACG	1	40.1268	93	1	41.9886	77	1	35.3123	77
1103	RM11978	GGCCTTTGTTAGAGAAGACATGG	GAATGATTATGCCCTAGGTTGC	1	40.144	297	1	42.0056	298	1	35.33	297
1104	AUT11979	GTTGACAGGGCTAAATGTAGATCG	ACTTTGCATGGACAGGTTATGG	1	40.1949	398	1	42.06	382	1	35.3809	388
1105	RM8235	GTTGACAGGGCTAAATGTAGATCG	ACTTTGCATGGACAGGTTATGG	1	40.1949	398	1	42.06	382	1	35.3809	388
1106	RM11982	CGCGTTCTCCCTTCTTTCTACTCG	GTTACATGGGCCTCCAGCATAGG	1	40.231	194	1	42.0927	210	1	35.4145	194
1107	RM11985	GACTCACCGTGATAGAGCACACG	GGATACAATGGGACAACAATACGG	1	40.2632	294	1	42.1373	281	1	35.4477	312
1108	RGNMS483a	CTCTCCCATTCGCAGTCTACCT	AAACAAACCGAAGGCATCACAT	1	40.2986	313	1	42.1721	313	1	35.4837	313
1109	RGNMS946	CTCTCCCATTCGCAGTCTACCT	AAACAAACCGAAGGCATCACAT	1	40.2986	313	1	42.1721	313	1	35.4837	313
1110	RGNMS277	CTGTTTATCTCTGGTGTTATCTTG	TTAATGTTGCAAACTTACAATACA	1	40.3237	304	1	42.1921	303	1	35.5085	304
1111	RM11986	TCAACCTCGGTGTTCCTCTAAGC	AGCGACACCTCAACTCTGACAGG	1	40.3597	146	1	42.2405	144	1	35.5446	151
1112	RM11988	CTCCGACAGGATCTGGGACTGG	TATGACCTCATCGATCAAGGGAAGG	1	40.3695	410	1	42.2503	396	1	35.5548	742
1113	RM11990	AGATTACACATGCACGGTTACGG	ACACGCACAGTTTCAACGATCC	1	40.3727	78	1	42.2535	78	1	35.5583	78
1114	RM11991	CAGGGTTGAGACGTTGGAATCG	ACGCCTCTCTCCTCTCCCTTCC	1	40.3914	79	1	42.2762	79	1	35.5773	82
1115	RM11992	GAAGAGAATACTACTCCCTCCGTTCC	CCAAGTCTCTGGTGCGTACTATTCC	1	40.3927	185	1	42.2775	211	1	35.5786	153
1116	RGNMS1093	ACTACTACTCCTACTCCGTTCATC	GTGTGAGCTCCTACTACTACTCCT	1	40.3992	332	1	42.2839	333	1	35.585	332
1117	RGNMS465	ACTACTACTCCTACTCCGTTCATC	GTGTGAGCTCCTACTACTACTCCT	1	40.3992	332	1	42.2839	333	1	35.585	332
1118	RM11993	CTCAAGGGTTAACCACAATGG	ATACACCAACGACTTCAACACC	1	40.4308	481	1	42.3173	515	1	35.618	487
1119	RM11994	GTGTTGAGTGTCATTGGTGTATGC	CATATACTCAGCTACCCTCGTATGC	1	40.4312	483	1	42.3179	429	1	35.6185	159
1120	RM11995	TGTCATCGAACAAAGGAGAGAGC	AGGGCTGTCAAGTAGCAACATCG	1	40.4318	178	1	42.3183	178	1	35.6187	177
1121	RM11996	CCGTCGTCAATATTTCTACGACACC	GGCTTAAATTGCCACTGTTCAGG	1	40.4398	146	1	42.3266	144	1	35.6267	160
1122	RGNMS21	AAAGGCTTAGTGTACGTGAGTC	ATACTACCAAACACAATCTTACCA	1	40.4719	291	1	42.3814	291	1	35.6614	271
1123	RM11998	GGGAACTCCATACTGCTATGTCG	AGTAGGGTATCGTCGGTGTCAGG	1	40.5429	246	1	42.4568	182	1	35.7153	217
1124	RGNMS71	GTACATGCAGATAACAGATGGTT	TAAGTAAACAAATACAAGCCAAAG	1	40.5654	111	1	42.4932	111	1	35.7382	111
1125	RM11999	TATGGCACGATGAGTTGAGTTCG	CACCGAGACCACACATGTACTCC	1	40.5708	299	1	42.4985	299	1	35.7435	299
1126	AUT12008	GCTTGCTTGTATCTGCATTGGTAGG	GGGATGATCCACTCTCTGTTTGG	1	40.6508	498	1	42.553	500	1	35.8074	492
1127	RM8134	GCTTGCTTGTATCTGCATTGGTAGG	GGGATGATCCACTCTCTGTTTGG	1	40.6508	498	1	42.553	500	1	35.8074	492
1128	RM12009	CCACCTCCACCTGACCTTCTCC	TCTCCCTCCACTAGTCTTGTTCTTGG	1	40.6532	192	1	42.5554	186	1	35.8098	188
1129	RM12010	GGACCGAATCATGAGACAATGG	TTGATGACGTCAAGCGAGAAACC	1	40.672	284	1	42.5742	278	1	35.8288	278
1130	RGNMS323	AATAAACTAGTCACCTTTCTGCTT	CACCGACAGTTCTTAAACTATATG	1	40.7012	321	1	42.6008	321	1	35.8637	321
1131	RGNMS299	TGAAACTTAAACATCTCCTAGAAA	AAGCAGAAAGGTGACTAGTTTATT	1	40.7014	270	1	42.6011	270	1	35.8639	270
1132	RGNMS414a	TGAAACTTAAACATCTCCTAGAAA	AAGCAGAAAGGTGACTAGTTTATT	1	40.7014	270	1	42.6011	270	1	35.8639	270
1133	RGNMS357	ATAAACCCTAACTATTCCTTCTCC	AAGAAATCTACATGACACCATAGA	1	40.7295	344	1	42.6298	344	1	35.8919	344
1134	AUT12013	ACCGCCTCATTCTTTCCGATCC	AGAGGCGGTAGTATGCTCGTTGC	1	40.7425	97	1	42.6427	84	1	35.9056	97
1135	RM12014	CTCCGCCTCCACACATTACAGC	CTCGGGTTAAGGCTCGAAGTGG	1	40.7566	160	1	42.6568	160	1	35.9196	160
1136	AUT12015	GGCTTGTGTTACTGCGATCTCC	GGTTCACTGCTCAATAGTCACAGG	1	40.7644	461	1	42.6646	489	1	35.9274	483
1137	AUT12016	TCACCTAAAGCAGCAGTATCATCG	AATTAACGGTCGGGAGTCAAAGG	1	40.7764	97	1	42.6779	91	1	35.9395	94
1138	RM12017	CCTGGAGGCTTGAGTACAAATTAACC	CAAGTGAAGGCTGTGCCTATCC	1	40.7769	84	1	42.6784	73	1	35.94	84
1139	RGNMS8	TGATAACAACATTATTTCCATCTC	CACTTATGTAGGTTTGAGTGATCT	1	40.7885	174	1	42.6899	174	1	35.9516	174
1140	RGNMS4	TTAGTATTAATGCTTCATGTGGAT	CTACCAGCATTCTCAATCTAATAA	1	40.7899	280	1	42.6911	235	1	35.9529	280
1141	RGNMS53b	TTAGTATTAATGCTTCATGTGGAT	CTACCAGCATTCTCAATCTAATAA	1	40.7899	280	1	42.6911	235	1	35.9529	280
1142	RM12018	TTAGGCGATCGATCTCATCTCTCC	CAGCTTCCCGTGAGTAGCAACG	1	40.7933	328	1	42.7001	332	1	35.9564	328
1143	RGNMS87b	TTTGGGTTATTGTTAGTCTCATTA	AAGAGGAAGTAAGAGTAAGGTCAA	1	40.7968	282	1	42.7035	282	1	35.9599	282
1144	RM12020	CATATACAGGCTACATGACTGC	TGTGCTTCAGTAAGTGTGAGG	1	40.8317	96	1	42.7383	96	1	35.995	96
1145	RM12021	TAATTTCTGGCACGTACGCATGG	GTAGCGATGCAACTACCAGTGAGC	1	40.8345	463	1	42.7411	407	1	35.9978	393
1146	RGNMS151	ACATATATCTACGTGCACTGAATG	TACTCAACATGCTCATAATTTCTT	1	40.8346	259	1	42.7412	203	1	35.9979	183
1147	RGNMS158	AATGTCACCTAATTAAAGCAATTT	CTTGAGCTCCTCCAGGTCCTCCT	1	40.8354	313	1	42.7419	311	1	35.9986	312
1148	AUT12022	ATGCTTGCAGACAATCGATGC	CTCTCCGCCTAAACAACTTGTGC	1	40.8365	458	1	42.6974	442	1	35.9998	450
1149	RGNMS168a	TACCAATTGTTGTATCCTGTATTC	TCTAACATCCTCATTTCTTTATGA	1	40.8368	246	1	42.6976	230	1	36	238
1150	RM12023	TGCGTACCTCTGCTCCTCTCTGC	GACGAAGCCGACCAAGTGAAGC	1	40.851	93	1	42.7576	84	1	36.0143	93
1151	RM12024	AAGGAGAAGTGGAGGTTAAGATAGGG	GTTAATTTACTGACCGGCCATGC	1	40.9033	278	1	42.8095	278	1	36.0471	278
1152	RM12025	GCTTGCAAGTGAAGTTGTCATGG	CACAAGAGATTCCTTGGTTCTTGC	1	40.9222	181	1	42.8286	181	1	36.0658	185
1153	AUT12027	AATTTGGAGGACGAGGAGATGC	CAGCTGCACCTCTTTCTACCTAGC	1	40.9288	321	1	42.8351	286	1	36.0724	291
1154	AUT12028	AATTTGGAGGACGAGGAGATGC	CAGCTGCACCTCTTTCTACCTAGC	1	40.9288	321	1	42.8351	286	1	36.0724	291
1155	RM8062	CAAATTACTCCATCCATTATT	GAGGAGATGCTAGTTAATTACA	1	40.9289	144	1	42.8352	109	1	36.0725	114
1156	AUT12029	CAGCATCAAGGGTCGCTACACG	CGATGGCGTGGGATAATTACGG	1	40.9307	359	1	42.8371	253	1	36.0743	355
1157	RM12030	AGGTTAGATTGAGACAGAGACACC	AAGTTAGCCTCGCTCTTCTACC	1	40.9325	308	1	42.8388	324	1	36.0762	310
1158	RM12031	TCCCTAGCTAGCTCTCCATCTCC	AGTACTACCGCTACATGTCTTCTTGG	1	40.944	295	1	42.8509	267	1	36.0864	240
1159	AUT12033	TGTGTAGCTGTCAGAAGAAACAGAGG	CACCCTGGAATTCTGCATTAACC	1	40.9597	254	1	42.8693	260	1	36.102	254
1160	RM12034	GTTGGGTGGCATTGCAGATTGG	GCCTGCAGAATTCAGATGGTTGC	1	40.964	79	1	42.8737	79	1	36.1064	79
1161	AUT12035	TTCCTCGATTTAGACTTGCACAGC	GGGAAGGAGAAGTCCCAGAAGC	1	40.9784	193	1	42.8952	187	1	36.1209	190
1162	RM12037	AGTTGCGGCTGCTTGTATTATGG	ATTGAACCAAGCCCGGATCTACC	1	41.0255	124	1	42.9421	120	1	36.1681	120
1163	RM12038	AGACGCACGCAACATCACTCG	GGGTATACCATACTCCCTCCGTTGC	1	41.042	384	1	42.9586	309	1	36.1846	633
1164	RM12041	GAATGGACGGTCTTGATTGACTAAGG	GGATCTAAGCGGGAAGAAATTAGCC	1	41.119	287	1	43.0478	287	1	36.2443	287
1165	RM12043	GGGAACATCTGGTTGATGTACTCG	GATACCGGTGAACACCAAATCG	1	41.2139	275	1	43.159	278	1	36.3397	275
1166	RM12045	CTGTTTGTGCTGTTGGGCTACC	CTTCAGGAATCCAGCAGGAGAGG	1	41.256	198	1	43.1984	198	1	36.3788	194
1167	RM12051	GAACGTGCTACGAGATAGTGTTTGC	GGTCTGCAAGGTCTAACAATGATTCC	1	41.2891	772	1	43.2266	740	1	36.4043	686
1168	RM12050	AACGTGCTACGAGATAGTGTTTGC	CGTACGACATATCGACTATACAGAGG	1	41.2891	604	1	43.2266	572	1	36.4043	518
1169	RM12052	GATCGTGGAAGGGTACGACAGC	TCCGTCGATCGAAACCCTAACC	1	41.3108	256	1	43.2472	256	1	36.4259	229
1170	RM12053	CTTCCCTCTCACCTTCATGTTCC	CTTCATCCTTCCCTTTGATCTGC	1	41.321	154	1	43.2574	158	1	36.436	150
1171	RM12054	GCCGTAGTAGCCTCCTCCATGC	GATCGATCGGTTGGTTGGTTGG	1	41.3255	223	1	43.2619	223	1	36.4406	211
1172	RM12055	GGCCAAATGGACTAAGAAGAAGG	CCCGATGCTTGAAGATATAGTGG	1	41.3846	180	1	43.323	204	1	36.5001	282
1173	AUT12057	GCCGCTAATGTTGTTGTCAAGC	CGAAGCCAACGTAGTCCAATCC	1	41.4759	172	1	43.4347	146	1	36.5818	148
1174	RM12058	CAACGGGAAGGTATCGTCAGC	ACCCACCTCCACACCTACACG	1	41.4826	262	1	43.4411	260	1	36.5885	262
1175	RM12059	AGCGCGAGAGATTTCGGAGAGC	ACCCAACCACCAAACCCAATCC	1	41.4859	225	1	43.4444	222	1	36.5918	222
1176	RM12062	TCTAGCGTGACAAGACTCCTACG	AAGTGGTACATCACGCTACACTGC	1	41.5661	87	1	43.5108	83	1	36.659	87
1177	AUT12063	TCCTGGCTGCTATTGTGGTTGG	AAGTCGTTCGTTGCATGAAGAGG	1	41.5799	185	1	43.5247	145	1	36.673	163
1178	RM12067	CCATTCGCTTCTCCAGTACACG	TCTAGCAAACACAGAAGGAGTCAGG	1	41.6723	293	1	43.6445	289	1	36.7644	297
1179	RM12068	GCTGTAGCTCCGGTCTCTCTCG	AGCAGCAGCAGCCAGTACTACG	1	41.6791	299	1	43.6512	290	1	36.7709	299
1180	RM12071	CTCAGACACGCATGCATTAAACC	CTATGGGCGTTCATTAGCTAGACC	1	41.6845	226	1	43.6566	228	1	36.7763	226
1181	RM12072	CCAAACATACTCATGAGGCCATAAGC	TGAACACCATGCAACATCAAGC	1	41.6971	190	1	43.6692	180	1	36.7888	196
1182	RM12076	AGCTGTGCGAGGAATCCAAACG	CTCCGATCCCAGCAGCTACTCC	1	41.7479	179	1	43.7964	187	1	36.8358	178
1183	RM12078	GTTGAATCCCAGAAGCAAACTCG	GACGCATGCTGCTTACTTACTCG	1	41.7724	470	1	43.8223	462	1	36.8599	462
1184	RM12083	GGCAGTTTGCAGTTTCTTTCACC	CAGTCACATTGGAGATGGAGAGG	1	41.8152	157	1	43.8686	147	1	36.8975	153
1185	AUT12084	AATCGGCGAGGTTTGCTAATGG	ATACGTGGTACGTGACGCTTTGC	1	41.8629	99	1	43.9107	103	1	36.9439	101
1186	RM12085	GGTGCTGAAGGGATCTAATGTCG	CCCATTACACCACTAGCTGATAGCC	1	41.8943	185	1	43.9428	163	1	36.9733	169
1187	AUT12086	GTTAGGTTAACGGGATCTTGTTCG	ATGCAGTCTCCATCATCGAAGC	1	41.8989	197	1	43.9472	177	1	36.9778	177
1188	RM8236	GTTAGGTTAACGGGATCTTGTTCG	ATGCAGTCTCCATCATCGAAGC	1	41.8989	197	1	43.9472	177	1	36.9778	177
1189	RM12087	TCAGGTCAGTATTGCTGCAAAGG	GGTTAATCCAGGAGATGCTAGTCG	1	41.9002	72	1	43.9486	72	1	36.9792	72
1190	OSR20	ggaagaggagagaaagatgtgtgtcg	tcaacagacacaccgccaccgc	1	41.9237	220	1	43.972	236	1	37.0027	224
1191	RM104	GGAAGAGGAGAGAAAGATGTGTGTCG	TCAACAGACACACCGCCACCGC	1	41.9237	220	1	43.972	236	1	37.0027	224
1192	AUT12088	GCTACCATGCACGAAACAGAGACG	ACCAAATGTGGCTGGCTGATCG	1	41.9636	194	1	44.0119	139	1	37.0398	149
1193	RM12089	GGACCAAACCAACCAGAGACG	AGTCCCTACAAGGAGGAGGTTCC	1	41.9768	249	1	44.0249	271	1	37.0529	246
1194	AUT12091	CTGCAAATGCACAGGAATCAGG	TCCTCTCGCCTTTCTTTCTCTCC	1	42.0096	141	1	44.0578	121	1	37.0857	101
1195	RM12093	CGGCGATATACAGTAGTACGTGTGG	TACACTTGTTGGTGGTTGGTTGC	1	42.0386	147	1	44.0874	147	1	37.1146	147
1196	RM12095	CCCACGTACGCACACATATACACG	CAGCCAAACAAACATGCTGTGG	1	42.0966	166	1	44.1059	182	1	37.1326	299
1197	RM12102	GACGGAGGGAGTGCTTTGTACCG	GCATCTGGCGTGGTTCAGTTGC	1	42.1217	181	1	44.1179	220	1	37.1501	199
1198	RM12103	AGTAGCTAGCAGGCAGCACAGC	ATGGATGCATGGAGAGGAAAGG	1	42.1257	84	1	44.1219	89	1	37.1541	84
1199	RM12105	GCATTGCTGGGTTGACCTGTCC	CGATCTGCGTCTTCTTCCATTCC	1	42.1606	237	1	44.1583	234	1	37.1874	240
1200	RM12107	CTGATAGTGATGTCCATTGTGTGAGG	CTTTCCTCTATGCCTAGAAACACACG	1	42.2165	356	1	44.2179	345	1	37.2424	350
1201	RM12108	TCCGGACACGTATCTCATATTTCC	TTCCTCTATGCCTAGAAACACACG	1	42.2167	152	1	44.2181	142	1	37.2426	146
1202	RM12109	CAATTAATCCTCTCCCTAGCAAGC	GAGTTCATGAGTTGAGTTGTGTGG	1	42.2182	155	1	44.2195	147	1	37.244	151
1203	RM12110	TTGGACCATTTAGGTCAGGAAGC	GTTGAGCTTGTTTGGTCCTTTCC	1	42.2192	274	1	44.2205	307	1	37.245	281
1204	RM12112	TCCAGATGGATGAGAGTAGTGACC	GTACATCCATCATCGATCATCACC	1	42.226	362	1	44.2274	379	1	37.2519	485
1205	RM12115	GGGAAATGAACAACAACGTGAGG	AGAAAGAAAGCCGACAGTTCTGC	1	42.2296	340	1	44.2306	376	1	37.2553	456
1206	RM12117	GGAGAAGAGTTGCTTGCCTTGG	GCTTACTTAAACCGCACCACACC	1	42.241	357	1	44.2425	374	1	37.2669	364
1207	RM12118	AGCAGCCATGGTAACTTCCTTCC	TGAAGCTAACTCTGAAACCCAACC	1	42.2433	110	1	44.2448	107	1	37.2692	110
1208	RM12120	TTATTCCCTCTCCTCTCACTCACC	GCAATACGCATTCACTTCATCG	1	42.2696	497	1	44.2712	502	1	37.2956	495
1209	RM12121	TCGGATCATCGGAATAGCAGACC	CCGGTACTACGAACTTGCACTCG	1	42.2703	445	1	44.2718	440	1	37.2962	445
1210	RM12125	GTGTTCGATTCCTTGCTTTAGAGG	ACGAGACGAGACGATACGAGAGC	1	42.2953	667	1	44.2989	656	1	37.3227	637
1211	RM12126	TCATCGTGCAGACCGTCTACTGC	AAGGACCCTGGACAGCGACTCC	1	42.3041	97	1	44.3075	97	1	37.3314	97
1212	RM12132	CTGCCAATATGCAAGAGGACATGG	TAGAAGCCTGCCCACTGAAACAAGC	1	42.3375	171	1	44.3311	113	1	37.3535	113
1213	RM12135	GGGACAGATAGAATCCCATAGCC	CTGCGACTTGCTCTTCCTCTACC	1	42.3661	397	1	44.3764	379	1	37.3811	368
1214	RM12136	TAAAGTGGGTGAAGAGGAGAAAGC	ACAGGTTCCATATTCCTGTTGC	1	42.369	182	1	44.3792	182	1	37.384	179
1215	RM12137	TGGAGCAACAGGAATATGGAACC	CTTCCCAGTGTGCGAAGAAATCC	1	42.3691	238	1	44.3794	232	1	37.3841	232
1216	RM12138	AGCTTGTTCAGCCGCCATAGCC	GTCGAAGCGTTGGTGAGATTTGG	1	42.3799	95	1	44.3888	104	1	37.3936	95
1217	RM12140	CCTACCAACCAATTCTGGTGAGC	ACAGCAATGCCACCCAGTAACC	1	42.4134	91	1	44.4246	87	1	37.4268	91
1218	RM12141	GGACTAGACCTCTCACTTGTCTTACC	CTGTCACGCGGAATAAGTAAACC	1	42.4313	189	1	44.4437	184	1	37.4446	184
1219	RM12142	TTCTCCTCCTCCTCCCACACTGC	GCGCAGGATCCAGAACCTCACC	1	42.4491	89	1	44.4673	89	1	37.4627	89
1220	AUT12143	TTCACCACAACGATAGAGACTTCTGG	GGGAAGAAGATGACAGAGCAAGC	1	42.4664	248	1	44.4938	242	1	37.48	248
1221	RM12145	GAGGAGGCGAAGTCGTGGAACG	GCAAGGAGGCGAGCAAGAAGC	1	42.5116	361	1	44.573	361	1	37.525	352
1222	RM12146	AGTATGCCCTGCCCACTACACTAGG	CAGCGAATGGCAAGAGCAACC	1	42.5138	99	1	44.5752	119	1	37.5272	113
1223	RM12147	GGTAGCGAGATCAGCGAGAGATCC	CAGGTCATGGCGTCACAGAGC	1	42.5248	230	1	44.5915	166	1	37.5382	230
1224	RM12151	CTGCTGTCATGGTGGAACAGG	AGTGCGTGAGAGACATGAGACG	1	42.5452	143	1	44.6105	143	1	37.5583	143
1225	AUT12153	CAAGGAAGATCTTGTGGACCATGC	CTGCAGATGCAGAGGCAGAGG	1	42.552	158	1	44.6265	154	1	37.565	154
1226	RGNMS369	CCAAGCCATATAGAGAGAGAGA	TCTAAAGATCCAAGAACAACAA	1	42.6074	235	1	44.6836	235	1	37.621	235
1227	RM12156	TGTTTGGTTGATGCAGCAAAGG	TTTACGTTCCCTTTGGGACAGG	1	42.6081	399	1	44.6842	408	1	37.6216	356
1228	RM12157	GCAATCAGTTGGAACTTGGAAGC	CAGATCACCTGAGCTGTGTTTGC	1	42.615	354	1	44.6915	348	1	37.6284	326
1229	RM12158	CCTGCGATTCCGACATAATTTCC	ATCGGTGGTATACGCTCTTCTCG	1	42.6256	103	1	44.7039	97	1	37.6389	100
1230	RM12160	ACGACGACCAATCCCAAGACG	AGCAAATCGGAGTACAGGATCAGC	1	42.6703	178	1	44.7513	172	1	37.681	172
1231	RM12161	CAGCGAATACAGTGCAAATGTACC	CATCCTCAGCCTCATCATCTGG	1	42.7014	377	1	44.8523	356	1	37.7773	355
1232	RM12162	CTTGTGGAACTGGAGCATCATGG	ATTTATACATGTCGGGCGTGTGG	1	42.7375	277	1	44.8845	308	1	37.8109	271
1233	AUT12164	GCGTGGAGATTCAGTTAAGTTTCACC	AATTCCGTGTCCGATTTCCTACC	1	42.8145	383	1	44.9686	405	1	37.8892	365
1234	RM12166	ACCGGCGATGGTGTGTATAGTCC	CCTTCTCCTCCATCTCGTCTTCC	1	42.818	198	1	44.9722	198	1	37.8926	198
1235	RM12167	TGTCCTGCTCCTTGATGATCTCC	TTCCACTAGCCCAAGAACTCACC	1	42.8247	178	1	44.9789	190	1	37.8993	180
1236	AUT12168	AATCCGTCAACCACCATGAACG	TTGCAGACTCATGGACACATGG	1	42.8769	144	1	45.0259	137	1	37.9466	134
1237	AUT12169	GAGCGCTAGGGCTTTGGATCG	GCCCATGTACGATGACGTGTACC	1	42.8829	158	1	45.032	162	1	37.9526	174
1238	AUT12170	CAAACATGGGCCAGAATTAAGAGG	GGCAGAGTGAAGAAGAGAGGAGAGG	1	42.8907	148	1	45.0396	140	1	37.9604	140
1239	RM8099	CAAACATGGGCCAGAATTAAGAGG	GGCAGAGTGAAGAAGAGAGGAGAGG	1	42.8907	148	1	45.0396	140	1	37.9604	140
1240	RM12171	GTGATGCTTTCGTCGTCGTTGG	GGAGGACAAGAACAAGAACAAGAACG	1	42.9089	155	1	45.0579	149	1	37.9779	149
1241	RM12172	CTTCTTTGGAGCCACCGCAACC	CCATGCAATCCTCTCTTGTGTCTCC	1	42.9096	115	1	45.0587	115	1	37.9787	115
1242	AUT12174	GGGACCAAGACCTTTCCAATGC	GCGGAAGCAGGAGAATCGTAGC	1	42.9932	229	1	45.1674	205	1	38.0612	223
1243	AUT12175	GGGACCAAGACCTTTCCAATGC	GCGGAAGCAGGAGAATCGTAGC	1	42.9932	229	1	45.1674	205	1	38.0612	223
1244	RM12179	CCATTAGTGAAAGGGAGCAAACC	CGAAAGCTGTCTCTGGAAATTCG	1	43.1169	156	1	45.2944	156	1	38.1842	134
1245	RM12182	GTTACGCCGAATCATGTCATTCATCC	CGGAGAGCATATTCTTGCTTGCTACC	1	43.1814	99	1	45.4185	107	1	38.248	105
1246	RM12194	CGTTGGTCTCCAAGATGTGAGC	CTCGAAACCTACCTTCCACATCC	1	43.5157	295	1	45.7571	292	1	38.495	292
1247	RM12195	ACACATAACACCACACTCACATCC	CTGACCCACATGTCATTGATCC	1	43.5298	440	1	45.7241	420	1	38.5087	396
1248	RM12196	ACACATAACACCACACTCACATCC	CTGACCCACATGTCATTGATCC	1	43.5298	440	1	45.7241	420	1	38.5087	396
1249	RM12198	CATTGGAGGATTATAGGAGCTGTCG	CCCACTTTCGGATCACTTCACG	1	43.5662	74	1	45.7963	70	1	38.5393	76
1250	RM12199	TCACATCCACACCTCTTCTGTGC	GAGCGGAGTAGTAGTACGAGCTTGG	1	43.5666	78	1	45.7968	78	1	38.5398	82
1251	RM12200	GACCGAGACATCTTACATACTCTTGC	GGAGTAGTGAACAGTGTTGGTTGG	1	43.5674	81	1	45.7975	81	1	38.5405	81
1252	RM12204	CCTTCCTAATACCCTGTCATCTGC	GCCCTTTCTTTCACTTGATTGG	1	43.6094	250	1	45.8166	172	1	38.5625	210
1253	RM12206	GGGCTGTCAACTTCTGATTCACC	AGCTCAATTCTTGTGCCTGAGC	1	43.6521	283	1	45.8631	280	1	38.6025	286
1254	RM12209	TTGCCATCCATTCGATTTCACC	GAGACCACCAGATCGCTTCACC	1	43.7376	83	1	45.9722	83	1	38.6882	91
1255	RM12212	CCTTCCTCCTCTCCTCTCACC	AACAGATCGAGATCCAGCTTGC	1	43.8206	214	1	46.0562	214	1	38.7587	214
1256	RM12213	GGTCCTAGTGCACGGCTTGTCC	ACCGGTTGTGCACACAAATTGC	1	43.8463	98	1	46.1103	98	1	38.7846	89
1257	RM12216	ATATTTAGCCTGCCCGTAATGC	GGTTGAACATACATTGGCATGG	1	43.8874	331	1	46.1508	327	1	38.8254	322
1258	RM12224	GCTTGCTTCTTGTGCAGTTTGC	AGCTGCTCCAGTTCAATTCATGC	1	44.0445	279	1	46.3044	279	1	38.9781	279
1259	RM12225	AAGACTGACATTGAACCCAACC	CAATAACTTGTCGGGCTATCTTCC	1	44.1406	139	1	46.4227	139	1	39.07	139
1260	RM12226	ACTAACTATTGCGGCCTCATCTTTCC	AGTTATGGTCACCAAGCGAAACG	1	44.1521	186	1	46.4331	196	1	39.0804	192
1261	RM12227	TGACGATGGCAGCAATTAGCC	CTCATGCTTGCTTCGTCCATGC	1	44.1561	130	1	46.409	127	1	39.0844	127
1262	AUT12228	CAACCAGTTCCTCCTCCTATGACC	TTTGAAATGGTGGAGTCCAAGG	1	44.1719	217	1	46.4529	217	1	39.101	220
1263	RM12229	GCAGAGAAACAACAGTCAACAGC	TGATGACCATGTGGAAGTATGC	1	44.1766	146	1	46.4567	140	1	39.1058	152
1264	RM12230	CACCTGTTGTGAATCTGTGATCG	CGGTGGAGCTTGTTATACTACTATGG	1	44.1769	247	1	46.4569	251	1	39.1061	263
1265	RM12233	CTTGAGTTCGAAGCGAGAAGACG	CACTTGAGCTCGAGACGTAGCC	1	44.2116	82	1	46.49	82	1	39.1404	79
1266	RM12236	GTTATTACTGCTTCCTCCGTTTCACG	TGGTTCCCAACAACTGATGTAGC	1	44.3347	383	1	46.593	837	1	39.236	326
1267	RM12237	CGTCCTCATCGTCATCATCTCG	GGATGAGGAAGGACGTAGACATGC	1	44.3577	116	1	46.6152	116	1	39.277	116
1268	RM12239	TGCGAGCCATCACCAACTACG	ACCATGAGCTGCTGGATCAGG	1	44.3744	153	1	46.6314	153	1	39.2939	153
1269	RM12240	GAGATTATCGCCGTTGATACCG	CTCTTCCTCGGCTTCTTGTCG	1	44.3748	256	1	46.6318	250	1	39.2943	250
1270	AUT12241	GGATACTCTATGTTCCTCTGCTGTGC	GTCTCCGCCGTCTCGTAAACC	1	44.4101	147	1	46.6671	147	1	39.3288	141
1271	RM12242	TTTCTTCTTCCGGTAGCCAAAGC	GGTGGGATGATGATGATTGTATGG	1	44.4463	283	1	46.71	279	1	39.364	287
1272	RM12245	TCCATCACTGGCACTGCTTGC	GTTCTTGCCGTCGTTGTCATTAGG	1	44.525	400	1	46.7656	455	1	39.4155	406
1273	RM12246	ATCTGGACAACAACTCTAGCATCG	TCCTGCCCTTCCTTTCTTTACG	1	44.5385	328	1	46.779	314	1	39.4291	295
1274	RM12247	ATCTGGACAACAACTCTAGCATCG	TCCTGCCCTTCCTTTCTTTACG	1	44.5385	328	1	46.779	314	1	39.4291	295
1275	RM12248	CATTATCTGAATCCGGAGGAAGTAGC	ACACAAACCCTCGCCTCAACC	1	44.5637	579	1	46.8086	551	1	39.4546	563
1276	RM12249	CATTATCTGAATCCGGAGGAAGTAGC	ACACAAACCCTCGCCTCAACC	1	44.5637	579	1	46.8086	551	1	39.4546	563
1277	RM12250	ACTACTACTGCAGCTTCCAGTCC	AATTTACTACGTTCGGGTGAGG	1	44.5753	356	1	46.8202	358	1	39.4661	350
1278	RM12251	TTAGTGGGTCTGATCATTGTGTCAGG	TGTTTCTCGGTAGTGAGGGAAACG	1	44.5779	158	1	46.8228	162	1	39.4687	156
1279	RM12253	TCTGGAGGTTGAAAGCTGAAACG	CGACTATGTCGGTGCCAAATGC	1	44.6135	351	1	46.8535	338	1	39.4913	321
1280	RM12254	TGGCTTCGAAAGTGAGGGTAGC	GTGTACTTGGTGATGGAACACAGC	1	44.6203	197	1	46.8603	197	1	39.4981	197
1281	RM12255	CCTCCCGTAAATAGTCCATACAGC	CTTCACGCATCCACTGATTATTCC	1	44.6473	98	1	46.886	98	1	39.5204	101
1282	RM12261	CAGGCAGAAACACACAGAGATCG	CGTCTGCTGGCGAGACTACTAGC	1	44.7128	168	1	46.9478	168	1	39.5723	171
1283	AUT12263	CCCAGGAATATCTCTATACACACAGC	CTCTACCTCGCTGTTGTCTCTGC	1	44.719	145	1	46.954	124	1	39.5785	151
1284	RM12269	CTCTACAGCTTGAGTTTGGTACATCC	GTGTTGGTGAGCTAGCTGTTGC	1	44.7284	96	1	46.9657	87	1	39.5879	96
1285	AUT12275	ATTGCGTGGGATATGGACTATGC	CCTCTTCAATTCCCTTCCTCTGC	1	44.8389	77	1	47.0669	67	1	39.6623	83
1286	RM12276	GTCGACGGCTTCCTCAAGATTGG	TGAGACCTCTGTGAAGGCACTCG	1	44.8392	188	1	47.0672	168	1	39.6626	172
1287	RM12279	GCAAACTTCAGCTATGACTTCG	GGGACCATCTACTTCTTATGTAGG	1	44.8513	573	1	47.0787	581	1	39.6742	573
1288	RM12280	GTTGATGGGTTGGCGATATAATCC	AGTTAGGGCGAGGCTATCTAGGG	1	44.8534	381	1	47.0808	375	1	39.6763	385
1289	RM12281	ACGGTTGGAAGAGAGAATGATCG	GCCCTGTAGGTAAGGAAGGAAAGG	1	44.8701	79	1	47.0984	59	1	39.6939	71
1290	AUT12285	CGACTGGAAGAAGGGATCATGG	CACACTACCAAGACTCCGCTATGG	1	44.9676	201	1	47.2178	144	1	39.7811	195
1291	AUT12286	CTCACTCACTGACCCACAACTCC	TTAAGATGATGGCTCCTCTCTGC	1	44.9737	189	1	47.2277	183	1	39.7872	186

## Sheet: Chr 2
SL. No.	Marker Information			Oryza sativa ssp. japonica			Oryza sativa ssp. indica			Oryza rufipogon
	Marker Name	Forward Primer Sequences	Reverse Primer Sequences	Osaj_CHR	Osaj_Position (Mb)	Osaj_Exp. Amp. (bp)	Osai_CHR	Osai_Position (Mb)	Osai_Exp. Amp. (bp)	Oruf_CHR	Oruf_Position (Mb)	Oruf_Exp. Amp. (bp)
1	RGNMS507	CCCAAATATGTGTCATGTCTTA	ATACGCCTAACGTATCTTGAAT	2	0.0048425	350	2	0.0045625	350	2	0.0032535	350
2	RGNMS689	CCCAAATATGTGTCATGTCTTA	ATACGCCTAACGTATCTTGAAT	2	0.0048425	350	2	0.0045625	350	2	0.0032535	350
3	RM12294	CCATCAGGCTGTGACAAGAAGC	CCAATCTCCATGCAATCTGAACC	2	0.0049205	192	2	0.0046405	192	2	0.0033315	192
4	RGNMS506	TGAAATTTGACTTGTAGTTGGA	CAAGAAGCAAGTGTTAATTCTG	2	0.0051295	216	2	0.0048495	216	2	0.0035405	216
5	RM12295	GGAAGACGTGGGTCTCATCTATGG	CCTCGACTACCTCATCGACAACG	2	0.0080385	151	2	0.0077595	151	2	0.0064505	151
6	RM12297	AGCCCAAGGTCTCCGATCTCTCC	CTCGACGATGTCCTGGTCAAGC	2	0.014316	184	2	0.013569	184	2	0.012552	190
7	RM12298	GGGTGCGGTACTTAGCTACTCC	CTGTCTACTTGCATTGCTATCTCC	2	0.0482105	274	2	0.0485285	292	2	0.0453565	262
8	RM12299	TGCCTCCTCCCTCCTACTACTGC	ATGGTGTTGTCTGCCTGACTGC	2	0.048853	163	2	0.049189	163	2	0.045987	157
9	RM12300	AGTCAGGCAGACAACACCATCG	TGCTGTTCATCTGTGTCAGTCAGC	2	0.0489965	156	2	0.0493325	158	2	0.0461245	148
10	RGNMS546	TAGGACTACTAGATGCCAACCT	TGTTAACATAGAAGTAAGAGAGAA	2	0.0552435	105	2	0.0555815	105	2	0.0523625	105
11	RM12303	GTTTCCCAAACAGGCAGCTAGG	TAGATCGAGGTGCATATGCTTGC	2	0.0797355	291	2	0.0798015	291	2	0.0777295	285
12	RGNMS713	GTCTGTCTGTGCATGTTTGTAT	GAGAAATGGCTCCACTAGATT	2	0.0803755	134	2	0.0804415	134	2	0.0783635	134
13	RGNMS682	CTATTGATGATGAATGGAACAC	ATTATTACCGTATCAGCAGGTT	2	0.0804165	105	2	0.0804825	105	2	0.0784045	105
14	RGNMS765	CTATTGATGATGAATGGAACAC	ATTATTACCGTATCAGCAGGTT	2	0.0804165	105	2	0.0804825	105	2	0.0784045	105
15	RGNMS839	CTATTGATGATGAATGGAACAC	ATTATTACCGTATCAGCAGGTT	2	0.0804165	105	2	0.0804825	105	2	0.0784045	105
16	RM12304	CACTGGAGAATTGGAGAATGATGC	ATCTGCCTCCAAGGTCCACTACC	2	0.0805345	215	2	0.0806005	215	2	0.0785225	215
17	RGNMS703	TCTTTCTTTCTTTCTTCCCATA	ATTATTACCGTATCAGCAGGTT	2	0.0806465	335	2	0.0807125	335	2	0.0786345	335
18	RGNMS656	TGGGTAATTAACAGAGCATGTA	AGTAGTACGTAAAGATGGATGGA	2	0.0809505	354	2	0.0810165	354	2	0.0789385	354
19	RGNMS632b	TATGCAGTGGGTAATTAACAGA	TATGGGAAGAAAGAAAGAAAGA	2	0.0809575	332	2	0.0810235	332	2	0.0789455	332
20	RGNMS931	CTCTCTCATCGTCTCTTCTTTC	TCTGTTAATTACCCACTGCATA	2	0.0811925	256	2	0.0812585	256	2	0.0791825	258
21	RGNMS691	TTAATTAATGACCTGCACATTG	ACCGAGAGAAGAAATTAACAGA	2	0.0813375	360	2	0.0814035	360	2	0.0793275	362
22	RM12305	AGTCTGACCCTTGAGCAAGTTCC	GGAGGCAGATCAGTTCATGAGG	2	0.081985	175	2	0.082051	173	2	0.079976	167
23	RM12306	GGTGAATTCAGCCATGATCTCG	CCGAGAAATTTGGGAGGTAATGC	2	0.0877055	282	2	0.0877655	282	2	0.0856355	282
24	RGNMS734	AAGGAAATGTTGGTTTACTGAC	AAGTGGTGTTCTAGGATCAAAC	2	0.104963	119	2	0.10497	119	2	0.102874	119
25	RM12308	GTTTGCGGATGCATTCAGTACC	GGATCGCCCTGCATATTTATACC	2	0.120358	177	2	0.126071	167	2	0.117968	177
26	AUT12310	CCGTGCATCTCGCTACCTAACC	TGCACACACAACTTAGAGGAAGAAGG	2	0.124654	183	2	0.130571	150	2	0.122431	177
27	RGNMS884	CTATCTGTCTGTCTGTCTTTGC	TGTAATTTCATTTCTCCAACAA	2	0.125149	171	2	0.131033	169	2	0.122922	171
28	AUT12311	ACAGCGGGAGGTGTTTGAAGTGG	CGAAGCCGGTAAAGCCCATTCC	2	0.129562	79	2	0.135787	75	2	0.127784	75
29	AUT12312	GCCAAGTGACTACTGGACCTTCC	GAACGCGCTGTCAAGTTAAAGG	2	0.130168	143	2	0.136389	139	2	0.128383	139
30	RGNMS932	CTTCTAGAGCTTGCCTATTCTC	CTTTCATTCAAGGATATGGTCT	2	0.134162	226	2	0.140155	226	2	0.131976	226
31	RM12313	CCACAACGCATGCTACTCTCAGC	ATGCAAGATGGTGGATGGATGG	2	0.146442	157	2	0.145971	141	2	0.1378	141
32	RGNMS504	TTCTAATATATTGATGCGTTCG	CATATGTAAATGGATGGTTGAG	2	0.147172	247	2	0.146679	256	2	0.13852	609
33	RGNMS559	AACTAGTCTTCTTTCTTGTCCG	TGGAAGAATGTGTAAGTTTCAA	2	0.149737	159	2	0.149255	158	2	0.141473	159
34	RGNMS594	GATGGATCGAATAAGAGGAATA	AGATTGGCTCTAACAGAGTAGC	2	0.158889	377	2	0.163241	379	2	0.153733	377
35	RGNMS698	TTATTAATTTGCATTCTCATCG	TTATTCATTCGTCTTTCATCTG	2	0.168601	148	2	0.172764	148	2	0.163134	148
36	AUT12316	AGCCAAGATCGTCTTCATCTCTCG	TCGTCTCCTTCTTCCTTCTTCTTCC	2	0.183349	112	2	0.186872	117	2	0.178693	107
37	RM109	gccgccggagagggagagagag	ccccgacgggatctccatcgtc	2	0.183396	96	2	0.186917	92	2	0.178727	82
38	RGNMS663	TTCGAGCTAAGAAAGAATAAGG	GAGATCAATTCAATGTTAGCCT	2	0.190648	397	2	0.194012	397	2	0.185966	397
39	RGNMS726a	ACTCATCTCTGTGCCTCTATTT	CCCTAGTACTCCAGAGTTATGC	2	0.205833	282	2	0.208719	282	2	0.200684	282
40	RGNMS813	TCCTCTCATCTCATCTTCTTCT	CTAATTAATCTGCACAATTTGG	2	0.221743	278	2	0.224106	271	2	0.216134	278
41	RGNMS700	ACAAGTTATCCTTACTCAGCCT	GAAGAAGATGAGATGAGAGGAG	2	0.222032	310	2	0.224364	278	2	0.216423	310
42	RM12322	ATGTTGTCAAGGTGCCTAGTTGAGC	TGGGTCCATAGAACGTCAGTCG	2	0.263961	155	2	0.255736	155	2	0.235277	155
43	RM12323	AGCTCTGATATGCTGCGACTGC	CCACAACTTTGTGCAAGACAGG	2	0.285799	196	2	0.277589	196	2	0.259184	193
44	AUT12324	TCTGCTCTTGTACGCTACTTCTCC	AGTAATGTGAAAGGGCATCTCC	2	0.288027	190	2	0.27984	190	2	0.261391	190
45	RGNMS738	ATGTTAATCCTGTTTGAAGGAG	CTTGTCTATACTGTGGTTGTGC	2	0.307675	113	2	0.308839	113	2	0.27944	113
46	RGNMS890	TATCTGCATTTATTCGTTGAAA	AATTATAATAGCCCATCAGACT	2	0.314964	131	2	0.316142	129	2	0.286741	131
47	AUT12325	CAAGCCTACATGGCCTAGACTCC	ATCCATGATCCATCATCCATGC	2	0.346513	251	2	0.336446	250	2	0.313791	254
48	RGNMS496	TGTTAGGTACTCAGGTGCTACA	TGGAAGCCTCAAATTACTTTAT	2	0.350865	211	2	0.340865	211	2	0.318142	211
49	AUT12326	GAGAGAGACACCAAATGATCCATCC	ACTGATTTGGCCCTTGTTCTTGG	2	0.386122	171	2	0.346339	151	2	0.323567	171
50	RM12327	GGAGAGCTTGCCAAGAACAAGG	CTGCACTAAGCTTAAACCTCACTCG	2	0.386259	704	2	0.346457	704	2	0.323705	704
51	RM12329	AGGAAGAGGCGAAGGTAGATCG	CCAATCATGCTGTGTTTCAAGG	2	0.571541	239	2	0.61563	245	2	0.510001	245
52	AUT12333	TTGCAGCTTGTGTCGTTTACTGG	GCATTGGCGTTTGTTAATCACC	2	0.651859	228	2	0.688878	212	2	0.571968	228
53	RM12336	GGAGATCTGCCTCTTTGATTATGTGG	AATACGCATGGGACTAGCTCTGG	2	0.713827	251	2	0.731749	293	2	0.629525	231
54	RM12337	GGAGATCTGCCTCTTTGATTATGTGG	AATACGCATGGGACTAGCTCTGG	2	0.713827	251	2	0.731749	293	2	0.629525	231
55	RGNMS569	CGGGACTTACTTGACTCATAAT	TAACTCCACACACATACACACA	2	0.715166	227	2	0.733128	233	2	0.630818	231
56	RGNMS607	CGGGACTTACTTGACTCATAAT	TAACTCCACACACATACACACA	2	0.715166	227	2	0.733128	233	2	0.630818	231
57	RGNMS657	AAGCTTATCACTGGTTTGTCTT	GTTTCACTTAAAGAATCAAGGC	2	0.731889	265	2	0.751723	265	2	0.648192	265
58	RGNMS674	TACTGTTGCTATCCTTCTCCTT	GTGAAACAACAAACAAATCCTA	2	0.785339	261	2	0.816295	261	2	0.700218	261
59	RM12338	AGCTCAAGCTCAAGCTCACAACC	TGCACTGCAACCTAAACCTTTCC	2	0.796348	247	2	0.827274	232	2	0.711241	241
60	AUT12340	CTTCTCGATCAGGTGGTAGTCC	GTCTCAAGCTCTTCAAACATGC	2	0.827144	236	2	0.856783	236	2	0.734769	236
61	OSR17	gctggttgattcagctagtc	gcctcgttgtcgttccacac	2	0.827144	236	2	0.856783	236	2	0.734769	236
62	OSR17	CTTCTCGATCAGGTGGTAGTCC	GTCTCAAGCTCTTCAAACATGC	2	0.827144	236	2	0.856783	236	2	0.734769	236
63	RM12341	CTGTACTATGTACTAGCCTGTAGCC	GCACCATTTGACTACTACTTCC	2	0.829426	306	2	0.859103	263	2	0.737744	263
64	RM12344	CATCTTCCTCCTCTGTCCCATCC	GATTGGATTTGGCGTGTCTCC	2	0.918765	199	2	0.956327	199	2	0.826612	196
65	RM12345	GCAGCACTTCTCTTCTGTTCAAGC	TCTGGTCTTGGTTCTCATCTTGG	2	0.930215	216	2	0.967774	204	2	0.838071	216
66	RGNMS503	ATGTTGATATGCTTGAACAGAA	ATAAATAAACGAGAGGAAACGA	2	0.930226	280	2	0.967785	282	2	0.838082	286
67	AUT12346	CATCCACCGTCCGATTCTACC	TTCCAGTCCTCTCCTCTCTTTGG	2	0.93435	250	2	0.971906	327	2	0.841479	259
68	AUT12349	CCGATTAGCGATTGATATGGAGTAGG	AGTGCACAGCCATGGAATTATGC	2	0.977719	296	2	1.02062	263	2	0.885339	677
69	RGNMS788	ATCTCAAATAGGAGAATGAGGA	TATCCAATCTATTGCACTTTCA	2	1.04044	336	2	1.10027	336	2	0.950703	336
70	RM12350	CGCAGCATATCAACCAATCACC	AGGAAAGAGAGCGGGAAGAATCC	2	1.04055	143	2	1.10038	143	2	0.950809	143
71	RGNMS511	AATCGGAGGAGGCGATGTGATT	CATTCTCCTATTTGAGATGACA	2	1.04064	218	2	1.10047	218	2	0.950904	218
72	RM12351	AGAACAGCCAAGGAGACACATGC	TGATTGTTCTGAGCTTGGGATGG	2	1.05585	137	2	1.11561	137	2	0.966117	133
73	RM12352	AACTTCTACTGCCTCGGCAAGC	GTACTCGTCGTCCACGATCATCC	2	1.0655	152	2	1.16391	152	2	0.975773	152
74	RM12353	TACTTCTCCCACTTGGACTTTGC	GATCAGTTCTTGAGATGGGATGG	2	1.0781	452	2	1.17657	464	2	0.988323	446
75	RGNMS636b	TTTAAGGAGAATATTTGGCAAT	CTTGAGCTCCTTGATTATTCTC	2	1.07825	355	2	1.17672	367	2	0.988468	349
76	RM12356	AGAACATTCACAGTCAGGCAAGC	CTCCAGGGCACTAAACCCTAGC	2	1.08931	296	2	1.18583	296	2	0.999567	296
77	RM12357	AGGATGAAATGGTGAGGACATGG	GCAGACGAAGGATCAAACAACG	2	1.09716	179	2	1.19315	179	2	1.00707	179
78	RM12358	TTGTCACGCCGGATCTGTTGC	AGGAAGAGGAGGTGAATCGGAAGC	2	1.12393	270	2	1.21877	270	2	1.03349	270
79	RM12359	GCTGCTGGGTTAGTTCACTGTAACC	TAAGGAGTGGCTCCTCCTCTTCC	2	1.13109	155	2	1.22593	155	2	1.04065	158
80	AUT12360	GCAACCACGACATCAAAGAAACC	GGAGGTTAGTGCTTCGGAGTGG	2	1.13224	196	2	1.22708	226	2	1.04181	211
81	RM12361	CTGCTCCTTCCAGCTGCTTCG	TGGGTAGCATGGATGAGTGAGAGG	2	1.14596	153	2	1.2407	153	2	1.05555	153
82	RM12362	CGTCGATCTTGATTTCGACAGG	CGAGATCAACGAGCTCAAGAAGC	2	1.18577	142	2	1.28133	142	2	1.0943	133
83	RM12363	TGCCAGGATGGACAATTAGATGC	CTCTGAGATTGAGGCTGCTCTGG	2	1.199	135	2	1.29505	123	2	1.10754	133
84	RM12366	CTCCACCGTGATCTCCATCCTTCC	CCAACTGCACCGTGACCAACG	2	1.26559	283	2	1.35916	283	2	1.16667	274
85	RM12369	TCTTACCGAAGCTAAGAACACC	AACTTGTGACACTAGGTTGTCC	2	1.30663	514	2	1.39568	514	2	1.20436	530
86	AUT12372	AAATTCGAAGCCATCCACCAACG	GCCGACGAGGTCGAGTAGAAGG	2	1.32696	152	2	1.4152	156	2	1.22386	155
87	RM110	tcgaagccatccaccaacgaag	tccgtacgccgacgaggtcgag	2	1.32696	155	2	1.4152	159	2	1.22386	158
88	RM12374	CGTCTGCCTCATGCTTAATCTCC	AGCTTTCCGTTGATCTTGATGC	2	1.38221	99	2	1.4732	99	2	1.27121	99
89	RM12378	AACTTGTCGTCGTCCCACTCG	GCACTCCCGTCCTCTTCATCG	2	1.46813	154	2	1.59273	154	2	1.35696	160
90	RM12379	AGAGACCAACCAGCAGCTGTCC	GGAGAAGAAGGCGTCGAAGAGC	2	1.47649	93	2	1.62073	93	2	1.36532	93
91	RM12380	GCTCCCAACTAGTGCAAGTACACG	CATGGCTAACTAGATCGACACACG	2	1.48973	141	2	1.63397	141	2	1.37858	139
92	RM12383	TTCCTGCTTCTCTATGTAGCTGTCG	GCTTATAGCAAGAGACCGTGTGG	2	1.51483	241	2	1.66848	239	2	1.40057	235
93	RM12386	CCATGCAGTGGTGAGTACGATGG	GTATGCCTGCCTGCTAGCATTGG	2	1.5299	391	2	1.6842	391	2	1.4127	401
94	RM12387	CTTGCAGAAGATTCCCAATTCC	AATGGTCCCATTCTCCTTTGG	2	1.55022	125	2	1.70453	125	2	1.43303	125
95	RM12388	CCCAATTCCACCAGAGAAGTTGC	CTGCTGTCGCTTGTGCTGTTCC	2	1.55024	192	2	1.70454	192	2	1.43304	192
96	RM12389	GCATACATACCGGCCAAGTGC	GCTTCTCCCGTCCACTTCTTCC	2	1.56939	167	2	1.72372	167	2	1.45216	167
97	RM12391	GGCATCATTAGAGTTAGCACGGAAGC	CTGACGTGAGGGTGCTTTGACTTACC	2	1.58684	299	2	1.75228	398	2	1.46961	295
98	RM12393	GCAAGCATCTCTCCTCGTCTTCC	GAAACCTCGTGGTGAATGTGAGG	2	1.59467	78	2	1.77999	78	2	1.47766	78
99	AUT12394	CTCCGCCGGTAATCTGCACTCC	ACCGGAGAGCTGCAAGAAGAAGG	2	1.61132	195	2	1.79664	195	2	1.49427	186
100	AUT12395	CTCCGCCGGTAATCTGCACTCC	ACCGGAGAGCTGCAAGAAGAAGG	2	1.61132	195	2	1.79664	195	2	1.49427	186
101	RM12398	CCTACTACTGTTTGCCGGTTTGC	GCAATAAAGTGGAAGCCTATCTCG	2	1.63989	252	2	1.82527	244	2	1.5222	192
102	RM12399	GCAAGGAGGAGGAATGGAAAGG	TTTCTCTCCGCTTCGCTTCTAGG	2	1.65061	216	2	1.83598	217	2	1.53285	219
103	AUT12400	AGAATAACTCCAGCCCACACTGG	GCGGTGATTTCTGATGACATTCC	2	1.6608	191	2	1.84529	191	2	1.54351	179
104	RM12402	CATACCATGAGTCCATGAGACAGC	GCAACTAAGCACTGCACCTAACG	2	1.69556	268	2	1.88003	268	2	1.57818	268
105	RM12403	GGATCTGAAGAGGTCGTCGAAGG	ACATCCTCTCCTGCATCAACACC	2	1.69594	124	2	1.88041	124	2	1.57855	124
106	RM12404	TCTCACTCACTCACTACTTGCTTTGG	ATGACAGCATCTCCTTGGATCG	2	1.69899	297	2	1.88346	297	2	1.58161	296
107	AUT12413	GACCGAGGTGGGTACATCATCG	GACATCCCAATGCAGCCAATCC	2	1.74347	363	2	1.92774	363	2	1.6267	363
108	RM12414	AAATCCACGTCCAAGAAGAAGG	CGCTACGTCAAGTACCATGTCC	2	1.75226	193	2	1.93653	193	2	1.6355	193
109	RM12415	CGAACCACCCTACAAACCCTAGC	CTTCTTTCCTCTGGGCCATCC	2	1.76431	377	2	1.94858	377	2	1.64755	325
110	RM12416	GCGAGCTATGGAATTGGATTCG	CGAGGGAAGAGGGAAGAGACC	2	1.80117	162	2	2.00326	162	2	1.68415	158
111	RM12417	CTCGCACTCTTGCTCCCTTCTCC	CATGAGCAGCTTGCACACATGG	2	1.84981	399	2	2.05314	399	2	1.71143	399
112	RM12418	GCAGAACATCAAGATGGACATGG	GAAGGCACAGATAGATACACCAACC	2	1.87444	165	2	2.07775	165	2	1.7372	162
113	RGNMS916	AGCTTGATGAACTGATGAAAG	ACAGATCAAATGAATGTTGCTA	2	1.87452	164	2	2.07783	164	2	1.73727	161
114	AUT12419	CTCTCCTCGCTCCCAATAGAGG	TTAGGCATATGAGGACGCAGAGG	2	1.87805	465	2	2.08136	476	2	1.74107	448
115	RM12420	TGCGACTAGAGACACACGAAACG	CCCAAACCGAATCCTGACTAACC	2	1.90301	295	2	2.09588	295	2	1.75345	295
116	AUT12421	ATCCACCGGATTTCTCCTACTCC	CCATTCGAGCCCAAACATAACC	2	1.94927	185	2	2.14606	185	2	1.81136	185
117	RGNMS907	AACATAAGTCTTGGTCCTTGTC	TCGATCGATTAGTTGGATTTAT	2	1.94941	451	2	2.1462	451	2	1.8115	451
118	RM12422	ATAACCCACCCGCGACTCCTACC	GCGTCAGGCTGTAGAGGTACATGG	2	1.9784	197	2	2.18549	197	2	1.83927	192
119	RM12423	ATAACCCACCCGCGACTCCTACC	GCGTCAGGCTGTAGAGGTACATGG	2	1.9784	197	2	2.18549	197	2	1.83927	192
120	RM12424	GTGCGGCCATGTACCTCTACAGC	AGGTCTCCTGGTGGACCTTGTCG	2	1.97857	371	2	2.18565	371	2	1.83943	371
121	AUT12425	GACCACCGTTCACACCACACG	AACACCCACAGCGATCAGAACC	2	1.98551	622	2	2.1926	620	2	1.84637	588
122	RM12434	TTGGTCATCTTTGGTTGGTTCAGG	GGACAATTCACACAGCAGAATTGG	2	2.07238	187	2	2.28676	187	2	1.93196	178
123	RM12435	CGGAAACTCTATCAACCAATGC	TGCTACCTAGAGACATGAGTGTGG	2	2.08935	245	2	2.30608	245	2	1.9489	248
124	AUT12436	GTGAAGCACATGTGGCTAGTTGC	TTCCCTCAAGAATCTGTGTCTTCC	2	2.10555	298	2	2.32243	298	2	1.96434	286
125	RM12437	CAAGCTTGAATGCTCCAGTGAGG	TCAGATGCAAGAAAGGCAAAGC	2	2.1064	296	2	2.32327	301	2	1.96517	285
126	RM236	GCGCTGGTGGAAAATGAG	GGCATCCCTCTTTGATTCCTC	2	2.1056	190	2	2.32248	190	2	1.96539	178
127	RM12439	AGATACATGTGCACCCGTAAACC	GACGAGGATGAAATGGTAGTTGC	2	2.18337	386	2	2.40832	389	2	2.03601	380
128	RM12447	AGTATGCTGCACTGCACTGTTCC	CAGCTGTCCAGACCAAATCATCC	2	2.33677	473	2	2.58721	471	2	2.15255	479
129	RM12452	CGACCCATCAAGTCTCTTCTACG	CTTCATCCACGTGAGGTTGTCC	2	2.41621	142	2	2.68139	142	2	2.22101	141
130	RM12454	GCACTATATCATACAGCCCTTGACG	GAGAGGGTGTGAGAGTGCTTTGG	2	2.56175	354	2	3.00222	320	2	2.36651	322
131	RM12456	TCCATCACCGTAGCTTCTCTTCC	ATGTGATGAGAAGGAGCCGTACC	2	2.60684	133	2	3.0367	133	2	2.39875	133
132	RM12458	CTCATTGGCTGTGACCAACTCC	CTCGACTGTTAGGAAAGGCACACC	2	2.62207	383	2	3.05488	383	2	2.40883	383
133	RM12460	TGGCACTACAGTGACAACAAACC	AGGGACTTTATCCAAAGGACACG	2	2.63373	168	2	3.06655	168	2	2.42051	170
134	RM12462	TAGCTTGCACCAGATTGAGATCG	TCAATCCTTCTTCCGTCCATCG	2	2.67725	391	2	3.11005	391	2	2.46402	356
135	RM12468	TCTTGGGCTTTCTTGACTTGACC	CACTGAAACCTCATGTCCTAGCC	2	2.74461	198	2	3.15557	204	2	2.5239	198
136	RM12469	ACTCCATCGAACCCTGTTAGAGC	GTCCATGTTTGCTTACGTGTTTGC	2	2.75466	435	2	3.16562	414	2	2.53421	431
137	RM12471	GCTACCACGGGCTTAATAATTCG	CACCTAGCCATTTCTGTTCAATCC	2	2.75884	466	2	3.17247	511	2	2.53839	406
138	RM12472	GCTACCACGGGCTTAATAATTCG	CACCTAGCCATTTCTGTTCAATCC	2	2.75884	466	2	3.17247	511	2	2.53839	406
139	RM12473	GCTACCACGGGCTTAATAATTCG	CACCTAGCCATTTCTGTTCAATCC	2	2.75884	466	2	3.17247	511	2	2.53839	406
140	RM12474	CCGGAATGCAATATGTGCTAATGTGC	AGACCGTCATGGACGCCAAGC	2	2.77195	516	2	3.1862	536	2	2.55141	494
141	RM12475	ACATTACTGGATGGCCACATCG	ATGGAGATGCTTTACCTCCAAGG	2	2.77502	375	2	3.18929	339	2	2.55446	341
142	RM12476	GACGAGTGATGTCAGCACATAAACC	ACTATCCACAGCAGCCATTGTCG	2	2.79195	221	2	3.20516	221	2	2.57107	221
143	RGNMS524b	CAGCACATAAACCTTATCAATG	TTAAGAATATTAAGGCCATCGT	2	2.79196	233	2	3.20517	233	2	2.57108	233
144	AUT12484	TCAAGATCAACGCACTCCTCTCC	TCGTACGAGCAACAGGTGGTAGC	2	2.86491	258	2	3.32295	258	2	2.63368	240
145	AUT12486	CCTCTCACTCACGTGGACTCTCC	CCTCACCCTAGGCTTTGATATGC	2	2.88209	170	2	3.35431	172	2	2.65073	162
146	AUT12487	CCTCTCACTCACGTGGACTCTCC	CCTCACCCTAGGCTTTGATATGC	2	2.88209	170	2	3.35431	172	2	2.65073	162
147	RM12491	AGACGGCCTGCTAAACTTTGACC	CGGAAATGATTCTACGGTGAGC	2	3.0917	199	2	3.63475	199	2	2.8223	199
148	RM12492	CCATGTACTGTGTGCTCTTCTTTGC	TGCTACCACCACGTTACACATGC	2	3.16093	90	2	3.70718	94	2	2.88557	84
149	RM12493	AACAGTCAGTTACTAGCGATGC	GCTTCTGTTTATAGTGCTGTCG	2	3.16757	144	2	3.71343	144	2	2.89194	144
150	RM12494	CACAGCACGCGAAATGGAAGC	CGTCGATCGGGAGTGAGTGAGG	2	3.19372	297	2	3.74059	305	2	2.91794	293
151	RM12495	ACTACCTCCACTTCCTCCACTCC	GCTTAATGGTGGCGTCAAAGC	2	3.2124	129	2	3.75928	111	2	2.93791	121
152	RM12496	TGTGGGTGTTCTAGGGTTTCACC	ACTAGCTGACCAATCCCGTCTCC	2	3.23301	188	2	3.77964	188	2	2.95827	188
153	RM12497	GCAGGTAATTGTCTTGATGCAGTAGC	CCAGAGCATATGGAGTGTTTGTGG	2	3.23593	265	2	3.78166	253	2	2.96117	255
154	RM12498	CATCTGAGTTCTGAAGGAGTTGG	CATACAAAGCCGACACAAAGC	2	3.25803	199	2	3.83477	199	2	2.98391	199
155	RM12499	CTCTCTTCTCTTCCTCCATTGATTCC	GTACGTCTTGTACCGCGTGTGG	2	3.266	178	2	3.84274	178	2	2.99189	178
156	AUT12504	TTGCTGCTCAAGTGGTGAGAAGG	TCGATGGGTGAGCCTTTCTTGC	2	3.45379	76	2	4.11749	94	2	3.17763	80
157	RM12505	AGTCTCCAATGTACGTGTGTTTCG	GATTGGAAGGGTACGTTGACAGC	2	3.47564	344	2	4.15022	344	2	3.19949	322
158	RM12506	AGTCTCCAATGTACGTGTGTTTCG	GATTGGAAGGGTACGTTGACAGC	2	3.47564	344	2	4.15022	344	2	3.19949	322
159	RM12507	CATCATTGGATGCCTTTCTTGACC	TATTGGGCCCTCTCTGTTCTGTGC	2	3.47874	184	2	4.15331	180	2	3.20256	176
160	RGNMS831	AGCTACTGTTGTTCTTGGAGTT	CTCAAAGAGAAGGCAAATTAAG	2	3.48698	233	2	4.16155	233	2	3.21079	233
161	RGNMS616	CTTAATTTGCCTTCTCTTTGAG	ACTAGAATGCAAAGTGGAGAGT	2	3.48719	362	2	4.16176	362	2	3.211	362
162	AUT12508	AAGAAGGTTTGGCCGGTTTGG	GTCGTGTCATGGAGCAAGCAACC	2	3.48738	87	2	4.16195	87	2	3.21119	87
163	RM12510	ATATGCCCGTGCTAACGCTATGG	GGCGTTGTCACGGTTATGAGC	2	3.52019	260	2	4.19476	268	2	3.24402	200
164	RM12514	CCTCATCACTTCATCTCAGCACTAGG	CCACATGGCGTGGTAGAAACC	2	3.5723	398	2	4.24765	398	2	3.2995	395
165	RM12515	AGCAGCAGCTGGTGGAACAGG	GTCGTCGTCGTCTCCATGTCC	2	3.59588	84	2	4.26968	84	2	3.32252	72
166	RM12517	CAGGACATCCCTGAACAGACAGC	CTCACCTTGGTGATCTTGAGAAGG	2	3.61085	181	2	4.28534	181	2	3.33753	184
167	RM12521	CCCTTATCTGCTAGCCTCACACC	CCACCGGATAATCCTTTAAGTGC	2	3.65394	247	2	4.32216	265	2	3.37133	250
168	RM12523	GGTGGCTATGGCTCCCAATTCC	ATGAGCAGCTTCAGCTTCCTTGC	2	3.68268	192	2	4.35206	192	2	3.39824	192
169	RM12524	AGTGTCAACGGCTAATGTCATGC	CTGACTTGGAACCACTTTGATCG	2	3.68615	192	2	4.3556	192	2	3.40172	192
170	RM12526	TACAAGGAGTGGCTCAAGTCAGG	TTGACATCTTCCTGCTCCATCG	2	3.69556	296	2	4.36501	302	2	3.41113	294
171	RM12527	GCAGCAGAGAGGAGAGGAGAGG	TTCTTCTGTTGCCTTGCTTTGC	2	3.70982	94	2	4.37931	94	2	3.4254	94
172	RM12529	GCATAATCACTGCCTGAAGAAAGG	TGTTGCTGTCTCTCTGCATATTCC	2	3.74383	262	2	4.41326	270	2	3.4588	272
173	AUT12530	CTCATGAGGAAGCGCATTGAGG	AGCTCCAGCTCACTCAAATTCTCC	2	3.77242	295	2	4.4419	292	2	3.48768	292
174	RM12531	CAAGAAATCAACAAGTGCCACTGC	AGAGGAGGGACAAGAAGGAGAGC	2	3.83191	181	2	4.51208	181	2	3.52642	181
175	AUT12532	GCATGGAGACCTTAATATCCAACTCC	GATAGACGATCGAGTTGGGTTGC	2	3.83319	236	2	4.51336	175	2	3.5277	246
176	RM12535	TCCCTTCGATCTCATCTCATTTGC	CTACACCTTCTCCTCCCGCTTCG	2	3.85318	218	2	4.53352	221	2	3.54774	218
177	RM12536	GTCGATCCCATCCATGAACTCC	ATCCAATCCTCCGAATCGTCTCC	2	3.86353	189	2	4.54387	188	2	3.55809	189
178	RM12538	ATTCACTCCTCACCGTGTCTTGC	CACTGATTAGCACAGGCTTGAGG	2	3.9269	197	2	4.58635	224	2	3.5979	197
179	RM12539	GGATGTTAACCAAGCAACTAGC	ATGCTATGGACACTAGATGACG	2	3.94548	484	2	4.622	508	2	3.61259	474
180	RM12540	GCTAGCTACTATTGGCTGCTACTGC	CACAACGATCTCCATTGTTTGG	2	3.98759	93	2	4.67464	89	2	3.65601	93
181	RM12541	ATGTGAAATCTCGCCGTCTCC	GTAGATTCCGTCCGCGTAGACC	2	4.0247	287	2	4.7112	271	2	3.69376	269
182	RM12543	CCATGAAGCCCACTAAAGGATGG	ACCTGTTCTGTTCGGATCAGTGG	2	4.04424	395	2	4.73006	405	2	3.71263	403
183	RM12544	AGCTAGCAAAGCGTAAACGAAGC	CAGCCTTTGGGTGAAAGAGAGG	2	4.05368	97	2	4.73953	85	2	3.72208	97
184	RM12546	TGTGATTACCCGTAGGATAGGTTCC	CTGCAAGACCTCCACATGTACG	2	4.05821	490	2	4.74401	488	2	3.72662	490
185	RM12552	GTGTGATGAACACGAATCAGATAGGG	GTCGTATCCATTTCTTCCTTGTGC	2	4.11592	296	2	4.81058	322	2	3.76307	413
186	RM12553	GTGTGATGAACACGAATCAGATAGGG	GTCGTATCCATTTCTTCCTTGTGC	2	4.11592	296	2	4.81058	322	2	3.76307	413
187	RM12557	AGCACCACCTCCTCGAACTCC	CAACCCTACCTTGCTTCTTCTTGC	2	4.19041	164	2	4.89832	155	2	3.83333	164
188	AUT12558	CTCTGTTGCAATGCCCAATACC	AAGGGAGTCCATGGAGATGAGG	2	4.20623	365	2	4.91497	266	2	3.84916	739
189	AUT12559	CTCTGTTGCAATGCCCAATACC	AAGGGAGTCCATGGAGATGAGG	2	4.20623	365	2	4.91497	266	2	3.84916	739
190	AUT12560	CTCTGTTGCAATGCCCAATACC	AAGGGAGTCCATGGAGATGAGG	2	4.20623	365	2	4.91497	266	2	3.84916	739
191	RM7581	CTCTGTTGCAATGCCCAATACC	AAGGGAGTCCATGGAGATGAGG	2	4.20623	365	2	4.91497	266	2	3.84916	739
192	AUT12562	TGGGTGGCTTCTTTGTTGACC	ATTACACAGCACGGTTGTTCTGG	2	4.22123	99	2	4.93008	109	2	3.86488	99
193	RGNMS718	CTAATTTCTGGATTACACAGCA	AGACATATATATACAGAAGGCCC	2	4.22132	137	2	4.93018	147	2	3.86497	137
194	RGNMS824	CTAATTTCTGGATTACACAGCA	AGACATATATATACAGAAGGCCC	2	4.22132	137	2	4.93018	147	2	3.86497	137
195	RM12563	CTTGGCCTCCGTACAGAAATACC	CATGTTTGCACATTGCTCATGC	2	4.22282	174	2	4.93167	174	2	3.86646	176
196	AUT12567	GGGATGAGAGTAGAAGGCACAAGG	GCTTAATGCCTTTGATCGTTGC	2	4.26428	271	2	4.97574	235	2	3.90384	233
197	AUT12568	TCTTCGAAACAAGCAGCTCTAGG	GATAGGTCGGATGTGTGATTTGG	2	4.27373	186	2	4.98518	150	2	3.91325	198
198	RM12569	GCTCATCATCATCATCGCAGTGG	ATCCATGTGGCAGACACACTTGC	2	4.28325	129	2	4.99405	139	2	3.92275	129
199	RM12570	CTTCCATCAGGACCTTCAATTCG	GCACGTAAACCTACAACAACCTTTGG	2	4.29713	151	2	5.00762	120	2	3.93663	145
200	AUT12571	TTGACATGCGAAATGGAGATGG	TTGGATCAGCCAAAGGAGACC	2	4.30576	158	2	5.01616	166	2	3.94525	158
201	RM12572	GGTTTGCTCACTTGGGCTCTGC	CTGGCGTGCTCGTACTGGAAGC	2	4.32631	389	2	5.03666	389	2	3.96589	383
202	RM12573	GGTTTGCTCACTTGGGCTCTGC	CTGGCGTGCTCGTACTGGAAGC	2	4.32631	389	2	5.03666	389	2	3.96589	383
203	RM12574	GCCAGATCTGATGTTTGTTTGG	GAAGATGAGCTTGACGAAGAAGC	2	4.33252	126	2	5.04296	126	2	3.9721	126
204	RM12577	GAAGAGACAAGACATGTACAGGTAGC	GTGACAACAGTGGTTAATGTGTGG	2	4.35739	466	2	5.06781	437	2	3.99704	466
205	RM12578	CCATTAATTAACCACGCACACG	TCGAGAGAGCAAACTAAGCAAGC	2	4.36203	197	2	5.07242	194	2	4.00167	209
206	AUT12580	CTTGATCTCATCCACCCTGTTCC	GCCAGGTACAACAAACCACAACC	2	4.41403	192	2	5.12871	178	2	4.05016	574
207	RM12581	CTCGAAAGCTTTGTGACCAGTGC	TTCACAGTTGCTCCATTCAGTGC	2	4.4541	297	2	5.16448	177	2	4.09226	250
208	RM12582	CTCGAAAGCTTTGTGACCAGTGC	TTCACAGTTGCTCCATTCAGTGC	2	4.4541	297	2	5.16448	177	2	4.09226	250
209	RM12583	CTCGAAAGCTTTGTGACCAGTGC	TTCACAGTTGCTCCATTCAGTGC	2	4.4541	297	2	5.16448	177	2	4.09226	250
210	RM12584	CGATGGGTGAGATTGGACTGG	TTGTGGCCTTCTCTCTACTGTTGG	2	4.4577	392	2	5.16796	371	2	4.09581	390
211	RM12587	GGCGACCGAGACTTTAATTTGC	CGGTGAAACAAGGTTTGGATTAGC	2	4.53054	702	2	5.24159	669	2	4.16713	692
212	RM12590	AGGAAGCGCAAGAGCGAGAGC	TGGACGTAGAGCTTGGAGATCTTGG	2	4.5435	199	2	5.27381	199	2	4.18006	199
213	RM12591	CCAGTCGCTCACCTCAGTCACC	ATTGGATGGGATCAGCATTCAGC	2	4.54673	182	2	5.24693	182	2	4.18331	170
214	RM12592	AACGGTAAGTCTCGCCTTCTTCG	CACACCACACCATCTCTCACTCC	2	4.56325	148	2	5.30344	148	2	4.19983	148
215	RM12594	AGCACAAGCTCAATCCACAACC	ATCACGGTATGCTGCTAATCTGC	2	4.57786	95	2	5.32406	97	2	4.21469	97
216	RM12595	GCATTGTTTCTTGTTGGGATGG	ACTGAAGTTGGTGTGGCTCTGC	2	4.60789	148	2	5.35384	144	2	4.24623	148
217	AUT12596	CATCAGAACCACTCATGCACACC	TCGATTCTCAGTTGGGTGAAAGC	2	4.63398	157	2	5.38564	136	2	4.27211	163
218	AUT12597	ACGAGAACATTGAGAAGGCGATTACG	TCTAGACTCTTCTCGAGGAAGCAACG	2	4.63429	323	2	5.38592	320	2	4.27243	320
219	RM12598	GGTGGCCAAGTACTGCCTGTGC	CACCATCCTGCCTCGACTTCC	2	4.65615	208	2	5.40806	205	2	4.29464	205
220	AUT12599	TTCACACGCACATGCACACACC	GTTCATGTGATCTTGCTGACCATGC	2	4.66689	274	2	5.41879	263	2	4.30535	268
221	RM12601	GCGAACTCGACGACTACTCAACC	CACAACGTCGTCTCCAAGTGC	2	4.69891	181	2	5.46982	189	2	4.33083	175
222	RM12601	GCGAACTCGACGACTACTCAACC	CACAACGTCGTCTCCAAGTGC	2	4.69891	181	2	5.46983	189	2	4.33084	175
223	AUT12602	AGAGAGGGTTGCTCTGCTCACC	ACTCTGCTGCGTACTCCTCTTGC	2	4.69903	461	2	5.46995	461	2	4.33094	475
224	RM12603	CATCACCGGGTACGACGAGACC	AGCGCGGAAGCGGAATTAGAGG	2	4.7088	107	2	5.48029	103	2	4.3425	107
225	AUT12604	CGAGGAAGAAGAAGGAGGTGAGC	CTGAGCTCTCTGCAACCTACGC	2	4.70906	98	2	5.48054	95	2	4.34276	92
226	RM12606	GGGTCCGAACCTGTATATACTCC	ACGCAGAGGCAATATCTCTATCC	2	4.79029	395	2	5.59876	794	2	4.44611	394
227	AUT12608	GAGAGAGGAGAAGACGAGGAGACC	AGTAGTGCGAGGTGGAGAAGACG	2	4.81701	93	2	5.63564	93	2	4.47286	93
228	RM12609	ACGAGCACCAGGAGAGGAGAGC	TCTCGGTGGTGAGAGGATACTGC	2	4.82944	131	2	5.64802	131	2	4.48529	131
229	RM12610	TCAAGTTTAGAGTGAGAGGTGAGAGC	ATGTGGCACTCCATCTTGAGC	2	4.83118	358	2	5.64976	361	2	4.48702	358
230	RM12611	CTCGACCTCCTCAACGGTACG	CATCTCGTCTTCGAGTTCATCTCC	2	4.83162	199	2	5.6502	199	2	4.48746	199
231	AUT12612	ATGATCGGATTCCTAACCACAGC	CGACAATAAGTCCCGTACCATGC	2	4.83577	265	2	5.65407	214	2	4.49161	239
232	RM12614	AATGCCCACTTCCAACACCAAGG	CCTATCATCCATCTATCCAGCCATGC	2	4.8658	89	2	5.68931	97	2	4.52263	89
233	RM12616	CCTCCAAGAACTCGAACCTGATCC	CTTAGCCATGGGCGAGGAAGC	2	4.88989	280	2	5.71962	280	2	4.54673	280
234	AUT12618	ATGAATGTCGTGCCGTTTCTGG	AAGTTTGGACTGCCCAATCAGG	2	4.91137	169	2	5.78139	165	2	4.56804	167
235	RM12623	CCAGGTATACGTAAACGGCACACG	CGAGCAGGATGGTGGAGAGACC	2	4.97394	229	2	5.81454	217	2	4.62206	228
236	RM12624	ACATGCTGTCCTGCCTTTCTTCAACC	CAGATAGTAGCTAGCCACCGGCAAGG	2	5.00663	342	2	5.80866	336	2	4.65452	338
237	RM12628	TCCTGGATGGATTGTCTCCTAGC	AAGATGATCGGCAACCTCATCC	2	5.02877	192	2	5.87229	189	2	4.67086	192
238	RM12629	GAGGAGGATTGGTAGGGTTAGGG	TTGTTGGTTGTTGGGATGAACC	2	5.04317	261	2	5.89438	255	2	4.68527	261
239	RM12630	CACCCTCCACCAGATCGTGTCC	CGCTCACCATGAACCCATCTACG	2	5.06445	139	2	5.91758	139	2	4.70655	139
240	RM12631	AAATTGGTAGGGATGCAAGTGG	GGCAAGGTACTTATGGGCTTGG	2	5.07667	283	2	5.9298	265	2	4.71877	283
241	RGNMS515	AGAACAAATAAAGCCCTACAAA	TAATCAGCTAGTGTGGTGTGAT	2	5.08006	388	2	5.93299	388	2	4.72216	388
242	RM12632	GGCTTTATTTGTTCTGGCCTTGTGG	CCAAATCAAATGGGTCCTTTGTGC	2	5.08007	472	2	5.933	444	2	4.72217	440
243	AUT12637	CACCATTGCTGACATGGAGTCG	GTGACCCGGCCTTCTACCTAACG	2	5.10091	160	2	5.94929	187	2	4.73672	160
244	RM12640	CCTTAGCCACGATGCTAATCACG	GCATGCTTGCTGTGAATAACTGG	2	5.12889	392	2	5.97942	364	2	4.76469	390
245	RM12642	GTTTGGCACGTGAGAATTGTAGC	GAGATGGATTGCAAGGAGTCTAGG	2	5.13811	296	2	5.98976	292	2	4.77391	296
246	RM12643	ATTACTAGCATGCATGGGCCAACC	TACACTGAAACGGCCATGTTATCG	2	5.15654	252	2	6.00813	249	2	4.79235	252
247	AUT12644	ATGCATGCAAGCGAATTTCACC	GCCGTTCTTCTGATGACGATGG	2	5.20192	193	2	6.0452	196	2	4.83005	193
248	AUT12645	ATAGACGGATGGCACGAGATGC	ATGTGTTCAGTTCAGTGGTGAGTGG	2	5.205	266	2	6.05965	264	2	4.83313	264
249	RGNMS593	CCTCTCTTAATCTCTTTGCCTA	TACAAACACATACCTTCGGTTA	2	5.20513	398	2	6.05978	395	2	4.83326	396
250	RM12646	GGCTAATAGCACTCACAACTTCAAGC	ACCATCCAAGTGTGTGACAGTGG	2	5.21293	149	2	6.07212	146	2	4.84107	144
251	RM12647	ATCCACCTCGGCTTCCTCAGC	GCTAGGGTTTCAGGTCTCAGTTCAGC	2	5.23836	175	2	6.09749	163	2	4.86633	175
252	RM12648	TTCTGCTAGGGTTTGTAGGTTTGG	CCTTTACGAAACGAGAGTCACATCC	2	5.25144	79	2	6.11023	73	2	4.87941	77
253	RM12649	TTGAGGTAGGGCACGAGGTCTGG	AATCCGAATGGGACCGAATCACC	2	5.25793	150	2	6.11672	146	2	4.88591	146
254	RM12650	CACCGCAAATCCCACTTATCG	TGGCCCTTCCATAAATAACACG	2	5.29752	258	2	6.1605	258	2	4.92413	258
255	AUT12652	AGCTGCAGCCACATGATCAGC	CGGCACCAGCTAGTAGAATTAGTTGC	2	5.3142	631	2	6.15469	605	2	4.9408	1125
256	RM1347	AACAAATTAAACTGCCAAG	GTCTTATCATCAGAACTGGA	2	5.3142	631	2	6.15469	605	2	4.9408	1125
257	RM1347	AGCTGCAGCCACATGATCAGC	CGGCACCAGCTAGTAGAATTAGTTGC	2	5.3142	631	2	6.15469	605	2	4.9408	1125
258	RM12655	AGGACCAATCCAAAGCGTTTAGC	CCTGCAGTAGATTGCATTGAACC	2	5.342	161	2	6.21453	155	2	4.96745	159
259	RM12658	CTCTCGAGATCAGGTTGGTTTGG	TCATGCACCCTAGCTACTACCTTAGC	2	5.36637	90	2	6.23794	90	2	4.99097	90
260	RM12659	GGGTGGAGGATTTAAACAAACC	AGGGCTTACACGTCAATCAACC	2	5.36679	637	2	6.23836	425	2	4.99139	591
261	AUT12660	GTTCGGCTCCACCTAAACCAAGC	GGCATTCGTCTCGTCTTTGAGG	2	5.37943	136	2	6.25078	130	2	5.00399	136
262	RM12661	TCCACCTCAACATATACGAGAGC	GCTTAGCTATAGGGAAGGAAAGG	2	5.41255	290	2	6.28876	290	2	5.03354	290
263	RGNMS642	GTTCATCTGCGCCTATTTATT	AGGTAAGGTAGGTAAGGTAGGC	2	5.41865	386	2	6.29481	381	2	5.03963	386
264	AUT12662	AAACATGCACGCATCAACATCC	GTCACGTTGTACACGGAGACTCG	2	5.44173	193	2	6.31872	203	2	5.06209	193
265	RM12663	GGCCGTAATGCAAGAAGAATGAAGG	TGGGATTTCTCAAGCCCAAGTACC	2	5.45027	373	2	6.3274	341	2	5.07064	373
266	RM5780	GCTGCTGCATCTTCTACTGC	ACGCACATGCCTAAGCCTAG	2	5.45317	120	2	6.33451		2	5.07322	99
267	AUT12665	CTGATCATCTCATGCCTCCTACG	TCCATCTCCCAATATGACCAACC	2	5.47753	166	2	6.35546	142	2	5.12245	148
268	RGNMS902	GAATGAGCAGTATCTGTTTCAA	CAACAACAATAAGACAGTGGAA	2	5.4777	263	2	6.35561	239	2	5.1226	245
269	RM12666	CTAGGAGAGAAGCTAGGGCTAACG	AAAGGATCGAGCAGAGAAAGC	2	5.55187	292	2	6.43389	292	2	5.19687	295
270	RM12668	GTAAACTGTATGCCTCCATTGC	TACAGGATCGACGTCAAGAGC	2	5.57636	441	2	6.45799	376	2	5.22262	399
271	RM12670	AAATGCGAGATCTTCCTGATCC	GGCGTCACTCCTACTCCTACTCC	2	5.60425	198	2	6.4849	192	2	5.25101	198
272	RM12671	ACGCTGTCAGTCACTTCCTCACC	CTATCTCATTATCGGCGATCACACC	2	5.63837	352	2	6.52704	346	2	5.28489	352
273	RM12672	CACAAACCACCGTGAGAAATCC	CATCGTCATCTTCTCCCTCTGC	2	5.65508	199	2	6.54378	196	2	5.30117	199
274	RM12680	GCACCTGCTCTCTGGAGACTCG	GCCTGATCGAGATCGCTTCTGC	2	5.80623	94	2	6.70747	103	2	5.32863	94
275	RM12681	CAGACATGGACACGACCAAGC	GCGCCATGAATGATGAGATAGG	2	5.85191	196	2	6.76157	187	2	5.3744	196
276	RM12682	CGATAGCTTGCTGCTGTTTCTGC	TCAGATCAGCTCAAGGACATTAGCC	2	5.8523	105	2	6.76195	93	2	5.37478	105
277	RM12685	TCCTCAATCAAGGAACAAGACAGC	TTTATATAGCGCGTCGGAGATGG	2	5.92462	181	2	6.83445	183	2	5.4465	191
278	RM12686	AGAAGGCGAAGGTTCATTGTACG	CACGAGAGTGCTTTGCTAATCTCC	2	5.93452	172	2	6.8444	172	2	5.45636	172
279	AUT12690	CCTCCTGAAGGGTAAAGGATTGG	TCCACACATGATCGCTACATCG	2	6.03563	609	2	6.90184	522	2	5.52872	538
280	RM12692	AGCTTGTCACCCAACAACAGC	GTTGCTGGGTATCTGAGGTTGC	2	6.11789	184	2	6.9924	169	2	5.60422	175
281	RM12693	GGCAGAACAGTCCCACTTAATTAGC	GAGTCCAAGTGGAGGCAGTTAGG	2	6.15153	298	2	7.03906	296	2	5.63147	295
282	RM12706	TTGGAAGGCATCCCGAACTGC	TTCGGCCTCCAACTCTAAATCTCG	2	6.3367	198	2	7.35776	189	2	5.81491	198
283	RM12713	TGGTGTTGGTAACTAATCCCTTGC	CATTTCCCACCTCACATTTCTCC	2	6.47471	281	2	7.42933	230	2	5.94937	273
284	RM12727	CTTCATGCGTGACATGGATTACC	CTGATTCGTTGGGTTGGGTAGG	2	6.76226	102	2	7.68505	101	2	6.27187	102
285	AUT12728	GTAGCAGCTGCCAAGGTGAAGC	AACCCAACCCAAACCAGTCTACC	2	6.7625	189	2	7.68529	198	2	6.27211	177
286	RM12729	TGGAGCAGCTCAAGATAGTAGACC	TATTTGGATTCCGTTCCAGACG	2	6.7758	199	2	7.69892	195	2	6.28568	187
287	RM12730	GAGGAAGCAAACCTCTCAAGTGC	ATCAAGATGGGCTTCTCCATCC	2	6.77729	243	2	7.7004	243	2	6.28716	243
288	RM12740	CATAAATGAGGGAGCGATGTGC	TGTCAGGGATGAGAAATGAGTCC	2	6.8875	199	2	7.80014	159	2	6.39052	163
289	RM12742	TAGACGCGACGATTCTGAACTCC	GCAGCAGCTAACTACCTGAAGAGC	2	7.01435	371	2	7.90004	371	2	6.49223	371
290	AUT12743	ATAAGCGACGCCAAGACAAGTCG	GGAAGCAAGAAGGAAAGAGAGATGG	2	7.0351	267	2	7.92662	267	2	6.51243	266
291	AUT12744	ATAAGCGACGCCAAGACAAGTCG	GGAAGCAAGAAGGAAAGAGAGATGG	2	7.0351	267	2	7.92662	267	2	6.51243	266
292	RM174	agcgacgccaagacaagtcggg	tccacgtcgatcgacacgacgg	2	7.0351	208	2	7.92662	208	2	6.51243	207
293	RM12747	GTTCGATCGTATCGGCATACAGC	CGTATGGTCTCCCGAATGTTAAAGC	2	7.10296	376	2	7.99643	412	2	6.57584	370
294	RM12748	AGTTCACGTGCCTAATTGACTGG	ACACCATCTTGCAACAACACAGG	2	7.10873	142	2	8.00212	142	2	6.5816	142
295	RM12749	TCTTCCTTCAGTCCTTTGTGATCG	CGTGCATTCTGCATAGTGTTGC	2	7.13959	489	2	8.03307	666	2	6.61242	435
296	RM12750	TGGGAAGCCTTAGATAAACAGAGC	AAGGACGGTGTGAGATTTCTTGG	2	7.16657	168	2	8.06043	162	2	6.63933	162
297	AUT12751	ATTCGTGGTCTCTGAGGCACTGG	CCTAGACGCGCGAGATTAATGG	2	7.17387	106	2	8.06359	108	2	6.64249	106
298	RM12752	CACCCAGGCTTTCAACACTCC	ATGCCTCATAGCCGATAATCTCC	2	7.20094	178	2	8.11403	176	2	6.6713	166
299	AUT12761	GAAAGCGAGGTGAAACGAAGC	CTAGGCCCAAGGTTTACCAAACG	2	7.31471	282	2	8.21939	294	2	6.77475	282
300	RM12762	GTGCTATGTGGCGGTTTGATAGC	CAATCAGTCGGTTCTCAAGATGG	2	7.32538	387	2	9.6409	356	2	6.78535	383
301	RM12763	ACACACAGAAATCAGCAGCAAGC	TTCCTGAGGATGTGTCTCATGG	2	7.3394	493	2	8.23648	490	2	6.79848	493
302	RM12765	AAGCAGGCGTAGAGGAGATGACG	CCTCTCCTTGACCCACCACTCG	2	7.35035	652	2	8.24809	652	2	6.8101	652
303	RM12768	TCGGATAGGGAGAAGAAGAAAGC	CCTCTCGAGCACGAAGATAGTCC	2	7.37766	320	2	8.27948	314	2	6.83695	314
304	RM12769	GAAGCAGAAGGCGTAACCTATCG	CACAGCAGAAAGAGACACACAGC	2	7.38217	163	2	8.28397	150	2	6.84141	167
305	RM12773	TGAGGAGGTTAGCTCAGCTGTCG	GTAGCAATGGAGGAGGAGTGAGG	2	7.39413	151	2	8.30452	151	2	6.85233	153
306	RM12774	TAAGGATGAATTTGGCCGTACC	ATCTCTCCCAACCACAACCTAGC	2	7.39631	468	2	8.29461	436	2	6.85451	453
307	AUT12778	TGTTGCTGAGGCAAGAACTAGACC	GACCAAGCATGCACTTAAACTAGAGC	2	7.45003	297	2	8.35596	417	2	6.90792	218
308	AUT12779	TGTTGCTGAGGCAAGAACTAGACC	GACCAAGCATGCACTTAAACTAGAGC	2	7.45003	297	2	8.35596	417	2	6.90792	218
309	RM12781	CTGGGACTCCACGGAATTAGAAAGG	TATAACGGGCGGCAAAGTGATCG	2	7.49008	310	2	8.39391	312	2	6.94703	308
310	AUT12782	GATACGTCACGGCGGAGATGG	CGATTCATCTCATTAGCCCACTAAGC	2	7.49979	292	2	8.40359	292	2	6.95792	292
311	AUT12783	CGGACACCCAACGAGATGTACC	GGTCCTTGTCAACAATGCAAACC	2	7.51223	99	2	8.41602	143	2	6.97037	137
312	AUT12784	CGGACACCCAACGAGATGTACC	GGTCCTTGTCAACAATGCAAACC	2	7.51223	99	2	8.41602	143	2	6.97037	137
313	RM12785	GTGTGTGCGTTAGTTCATCTCG	TGATCTAGCTGTACTGCATCACG	2	7.51533	88	2	8.41919	88	2	6.97354	88
314	AUT12786	GCTGCAATATTATCCCTGTTGTGC	GAGGGAGTATATACGATGTTCCATGC	2	7.5162	349	2	8.42005	296	2	6.9744	273
315	AUT12787	GCTGCAATATTATCCCTGTTGTGC	GAGGGAGTATATACGATGTTCCATGC	2	7.5162	349	2	8.42005	296	2	6.9744	273
316	RM2814	AATACCTGTTTGTATGTGTC	CACTTATAGGTTAATTATGTGA	2	7.5162	349	2	8.42005	296	2	6.9744	273
317	RM2814	GCTGCAATATTATCCCTGTTGTGC	GAGGGAGTATATACGATGTTCCATGC	2	7.5162	349	2	8.42005	296	2	6.9744	273
318	AUT12788	GTGGTCTGGGAGTTGTTGTCACC	CCATTGCCATTGCAGTTGTATCC	2	7.54812	128	2	8.45134	121	2	7.00648	124
319	AUT12789	ACCTGTACCCACAAACGGAAGC	ACGAACTAAGCGTACACGCAACC	2	7.57164	366	2	8.47432	370	2	7.0303	348
320	RM12791	GGGCCTCTGTCAGTCTCAAGG	AACTGTCAACCACAGGCTACTTCG	2	7.59787	102	2	8.49802	108	2	7.05875	102
321	RM12792	ATGATGATCTAGGCCAGCTACGG	CAATATGCAAGCGATGATGAGC	2	7.62025	383	2	8.52752	383	2	7.07985	383
322	RM12793	GACCTTACACCAGCAGCAGTCC	AGAAGAAGGTGGCTGGGTTGG	2	7.62394	279	2	8.53118	271	2	7.08354	278
323	RM12794	AATCGCGAGGAGAGATTCCATTTCC	GAGAAGAAGGTGGCTGGGTTGG	2	7.62408	144	2	8.53131	144	2	7.08367	144
324	RM12795	TTTCTGCAGATAGCATCGTGAGG	CAGTAGCAACTAGCAAACCAAGTCG	2	7.62431	155	2	8.53154	155	2	7.08391	155
325	RM12796	GAGAGGATTCATGGTGAGCATCC	CCAAGACCTCCATTCAAGAGTGC	2	7.67284	283	2	8.57901	283	2	7.13223	283
326	AUT12797	ATTATTGACCACCAACGCAACG	TGAAGATTGCTGAAGCAACACG	2	7.67553	269	2	8.5817	259	2	7.13493	263
327	AUT12801	ACAGTCACTAACACAGGCAGAGC	CCCAAGCTAGTACCAACTCAAGG	2	7.69315	180	2	8.59928	168	2	7.14933	172
328	AUT12802	AGGATCATTCTTGGCCTCTTGG	TCCTGCTTTCCATGCTTGTGC	2	7.69344	93	2	8.59956	93	2	7.14961	93
329	RM12805	ACCTCGAGCAAGACGACGATGG	GGAGGTTCTGGATGGTGGAGTCG	2	7.7193	258	2	8.61871	255	2	7.1685	255
330	AUT12806	CACTGCTTTGCTCTCCAGTCTCC	CAACATCTCCGTCAGAATCAAGC	2	7.73572	368	2	8.63504	336	2	7.19417	329
331	RM145	CACTGCTTTGCTCTCCAGTCTCC	CAACATCTCCGTCAGAATCAAGC	2	7.73572	368	2	8.63504	336	2	7.19417	329
332	RM12809	TCCATTTGTAGGACGGGAAAGC	CCACAAACACACAAGTTCGTATCC	2	7.77849	497	2	8.67508	417	2	7.27055	429
333	RM12812	GTCCCAGTTGACGGTCAGGTACG	GTCCACAGGGTCGTCATGTGC	2	7.8032	395	2	8.70015	682	2	7.29545	315
334	RM12827	GCTCTGGCACCGAGATTATTATAGC	GAGAGACTGCGACCTCTGTAGCC	2	8.14406	85	2	9.07234	76	2	7.51298	79
335	RM12831	GAGAGAAACCGAGGAGACCAAGC	ACCCGAATCGAAGGGAGTCTAGG	2	8.16407	387	2	9.09242	386	2	7.53265	387
336	RM12839	ACCATCTCCTCGTCTCTTTCTCG	ACATATCCAGCGGTGATCTAGCC	2	8.27233	273	2	9.24821	273	2	7.63042	273
337	RM12840	AACCCAGCTATGAGCTATCCATCC	TCTGGGCGAACCTACTACTAATCTCC	2	8.2819	229	2	9.25774	215	2	7.63995	397
338	RM12841	AACAGTCTTTCTACGCCTCACAGG	TCTTTCGTGGGTTCAACAAGAGG	2	8.33596	250	2	9.30781	256	2	7.68238	246
339	RM12842	AACAGTCTTTCTACGCCTCACAGG	TCTTTCGTGGGTTCAACAAGAGG	2	8.33596	250	2	9.30781	256	2	7.68238	246
340	RM12843	TTTCAAATCTCAGCTCCCTAGC	AGGGCTTCAAATTAAGGTGTGG	2	8.35085	257	2	9.32292	278	2	7.69727	638
341	RM12845	CTTGCGCGGCGAATGATATAGG	AACTTGACCGGAAACAAACACACG	2	8.42734	142	2	9.36779	138	2	7.76884	142
342	RM12847	GGATGTTGTATGTGGTCCCTTGC	CCCACTATGACATAATCCCTCTGC	2	8.55769	376	2	9.49133	389	2	7.89428	376
343	RM12848	ACATAGGGTACAACGAGGCATGG	TGATGATGCTGTACGAGACTTGC	2	8.56819	189	2	9.50195	193	2	7.90486	189
344	RM12849	TCCGATGACAATAAGGTGTGTGC	ACTTTGAGCGTAGTCCGATTTCC	2	8.58943	285	2	9.52474	283	2	7.92583	275
345	RM12850	GCTTGCACGAATGGTTCCTAGC	GTAGGATCGAGCCAAGCTTCTCC	2	8.59267	386	2	9.52799	368	2	7.92906	392
346	RM12853	TACAATCATATGGTGGGAGTGG	GGAATCAACCTCCCTATTCTAGC	2	8.62149	321	2	9.54986	335	2	7.9485	331
347	RGNMS659	ATATGGAAAGGAAATGAAAGAA	CATAACTGTTACTTGCCTACGA	2	8.62174	357	2	9.55013	371	2	7.94877	367
348	RM12854	CGCATACCAAGATCGATCCATAGC	CTTATGTTTCTCCGGCGTCTTCG	2	8.62238	281	2	9.55076	309	2	7.9494	281
349	RGNMS527	GTACTTATGTTTCTCCGGCGT	AGTCGCAAATAGATCAAGAAAT	2	8.62264	155	2	9.55105	183	2	7.94966	155
350	RGNMS645	GTACTTATGTTTCTCCGGCGT	AGTCGCAAATAGATCAAGAAAT	2	8.62264	155	2	9.55105	183	2	7.94966	155
351	RM12855	AACTGCTTGTCTTCGACCATCG	CGTCTTGCAGAATAATGCATCG	2	8.63678	152	2	9.56293	137	2	7.96352	152
352	RM12865	TTGAAATCAGGGCAGAGCATTCC	CGAGCTCTGATAATTTCGGTGAGC	2	8.72638	156	2	9.66235	156	2	8.04283	156
353	RM12866	TCAGTTAGCACGAAACCAACC	AACATCCAGATTCTAGAGGCTTCC	2	8.73921	91	2	9.67485	91	2	8.05547	87
354	RM71	CTAGAGGCGAAAACGAGATG	GGGTGGGCGAGGTAATAATG	2	8.76043	134	2	9.72391	140	2	8.08493	124
355	RM12869	GGAGCCTAGCTTCCCACCTAACC	AGCAGCTTGCAGTAGCCTCTCC	2	8.78446	254	2	9.72598	189	2	8.09998	244
356	AUT12870	GTGGTGGTGGAGAGGCTACTGC	CTACGGCGTACGGCAATCACC	2	8.78469	268	2	9.72614	162	2	8.10019	268
357	AUT12872	TTCATGATGTTGAGGAAGGAGACC	AGGCCGAATAACACCTCCTTTCC	2	8.79808	257	2	9.74237	257	2	8.11358	257
358	RGNMS672	TCAAGAACAGATGTCTAGTGGA	ATGTTCTCTGAAACCTGGAAT	2	8.84044	177	2	9.78683	177	2	8.14969	177
359	RGNMS869	TCAAGAACAGATGTCTAGTGGA	ATGTTCTCTGAAACCTGGAAT	2	8.84044	177	2	9.78683	177	2	8.14969	177
360	RM12878	AAATGGACCAAGACGAACAGAGG	GTAGCAACGCACTGAATGTCAATAGG	2	8.8457	195	2	9.79211	151	2	8.15495	199
361	AUT12879	ACCCACCAGTGATGTTTAGAGTCC	CTCACTGAATTCACCTCCTACTGG	2	8.89334	357	2	9.84364	364	2	8.20201	357
362	RM12885	TCTCCTCCATCCACCTGTAAAGC	GCTCGAGTGTCACGTACTTAATTGG	2	8.95662	198	2	9.93909	186	2	8.25905	196
363	RM12886	GAAGGGAACAGTTAGGTGCAACG	TCCTCCTCCCTTCTCTTCTTTCC	2	8.97212	78	2	9.95469	80	2	8.27446	84
364	RM12890	GCTCACCTAGGTTATCTGGATTTGC	GCATCAGTTCCATCAGTTCAATCC	2	8.99551	142	2	9.97781	142	2	8.29793	142
365	AUT12894	TAAAGGCCATGACAATCGATGC	TCATGGTTGTGAAGGTGATTGC	2	9.03794	239	2	10.0242	251	2	8.34295	239
366	RM12897	TCCTTCTCTTCTTCTTCCCTCACC	TGGATACCTTCAATCCGATTCC	2	9.0711	287	2	10.0547	279	2	8.38129	281
367	RM12898	CTCTTCTTGTCCCTCCTCTGTCC	GAGTATTGCACATTGCGTTTGC	2	9.07647	80	2	10.0601	76	2	8.38699	76
368	RM12899	CTTGTCGTCCAACCCTCCTCTCC	CGAGTTGAAGGCGAACTCGAAGC	2	9.11177	195	2	10.1055	192	2	8.41587	189
369	RM12900	CCTTCAACTCGGTCAACTTCTCC	GTTTCAACAACGCACCTTTCTCC	2	9.11196	188	2	10.1057	188	2	8.41604	188
370	RM12901	ATCTGCATGCTCCTCCCTGTCG	CCAGTTGAGCCAATCACAAACAGC	2	9.11727	139	2	10.111	130	2	8.42135	133
371	RM12914	CGGAGGGAGTAGTGGTGTATTGG	CACAATGGAGGAGCAGATGAGG	2	9.43963	241	2	10.197	81	2	8.61208	241
372	AUT12915	ACCGGAAGGGATACTTATCAGC	CTTCCTGTGAAATAGTAGAGGTAGGC	2	9.44544	217	2	10.202	252	2	8.6179	211
373	AUT12917	CTGTTGGGATTTGGGTATGATGC	CGAGATGTGATGAGAGCACTTGG	2	9.46153	133	2	10.2294	127	2	8.63111	131
374	RM12918	GCAAGTACTATGGGCCTCCAAGC	GGTGGCTGCTACCTCTTATTTAGTCC	2	9.48932	279	2	10.2566	277	2	8.65786	287
375	RM6375	AACGACAAGAGATGCACGTG	TTCGGGGATAGATCGACAAC	2	9.5556	159	2	10.3371	182	2	8.73152	144
376	RM12923	AAATGCACAGGCATTCGTAGACC	GAAGAAGTGGATGGAGGACATGG	2	9.57313	216	2	10.3446	213	2	8.74085	216
377	RM12924	CCCTATGAATTGTTTGGAGTGACC	CACTGGGTTCATGTCATAAGAAGG	2	9.57811	221	2	10.3506	229	2	8.74506	221
378	AUT12926	GTGGACTTGGCGAGATGCTACG	GTTAAGGGCAGCCACCAGATCG	2	9.59227	245	2	10.3647	242	2	8.75916	245
379	RM12941	TTATGCCATGTGGTCCAATCAGC	ATTTGAACCATTTGGGCCTTGG	2	9.91053	186	2	10.6865	190	2	9.0464	162
380	RM12946	TTCACTCAGGAAGGAGTCAGATAGC	CACTAGTCACTGTGTTGTGCATGG	2	10.0099	392	2	10.788	394	2	9.14796	392
381	RM12948	GTTCTGGCTGAGGTCGAGGTAGG	GCGGCGATCATCTTTCTGACG	2	10.0421	341	2	10.8205	335	2	9.18015	329
382	RM12949	CTACGCCACCAAACCCACTCC	ATTTGATGCTGTGAGGCTGTGG	2	10.1037	73	2	10.9153	77	2	9.23174	73
383	RM12962	CTCGTGGCTGGTGTAAGACAACC	TATACGCAAGACCACCACCTTCC	2	10.1641	360	2	10.9717	373	2	9.29178	380
384	RM12963	ACCCTTCTTCATTCTTCCAGTGC	GCTGGTTCCTCTTGATGCTATGC	2	10.2107	169	2	11.0167	169	2	9.33821	169
385	RGNMS699	TAATTAGCTGCATAACATCAGG	TCATTCTTCCAGTGCATAATAA	2	10.2109	204	2	11.0169	204	2	9.3384	204
386	RGNMS590a	TAAGCTAGCTGAAGAATCAATG	TCATTCTTCCAGTGCATAATAA	2	10.2109	285	2	11.017	285	2	9.33848	285
387	RGNMS709	TAAGCTAGCTGAAGAATCAATG	TCATTCTTCCAGTGCATAATAA	2	10.2109	285	2	11.017	285	2	9.33848	285
388	AUT12964	AAAGGTGTGTGATGGCTTGTGG	AGGGCTCTACTATGCACCAATGC	2	10.2145	373	2	11.0205	349	2	9.34202	359
389	AUT12965	CTACAATGATTCCATGCCTGTCC	TCCGGCTCAAGCTACAGTTAAGG	2	10.2165	174	2	11.0225	150	2	9.34403	152
390	RM12966	CCCTCCTCGATTACGATGATGACC	CTGCCTGCAAAGCAAATTTCAGC	2	10.2226	379	2	11.0288	379	2	9.35013	379
391	RM12967	CGATTTCGAGATCCATCCATCC	AGATTTCCGATCCTGGCTAATCG	2	10.229	130	2	11.0352	134	2	9.35672	130
392	RM12968	CTCCATCTCCCTCCTCGAAGC	TACCTTGTCGGCCGTGTAGAACC	2	10.2364	262	2	11.0423	263	2	9.36315	262
393	RM12979	ACCTTTGGTGTCAAACGGTCAGG	CATATGCTGGCAGGAGGTTTCC	2	10.3564	174	2	11.1436	162	2	9.46928	174
394	RM12980	CAAGAAGGCAAGAATAGCCGTATCG	TTCATCGCTTGCTTCCCAAACC	2	10.3648	292	2	11.1519	386	2	9.47761	280
395	RM12981	AAGCTCATGGAGGAAAGTGTGG	ATCACATGTTAGGCATGTCACG	2	10.3963	91	2	11.1795	91	2	9.50856	91
396	RM12988	GCCGAACCAATCTGCGATACC	AGAGTGCGATACCGTACCAATGC	2	10.7027	168	2	11.4682	153	2	9.797	168
397	RM12991	ATTCATCTCCGCCCTCCCTACC	TTCGACCGTACCTCATACATGTCG	2	10.7212	169	2	11.4775	169	2	9.80971	169
398	RM12993	CGGCCTCTTCTTCTTTCTTCTCC	GAGGAGGAGATCAAGCCCAAGG	2	10.7445	144	2	11.5165	141	2	9.83282	141
399	AUT12994	ACGACGTCACAAAGGGTTCTTGC	GAATACGCTTTCGCCTGCTACG	2	10.7767	99	2	11.5351	93	2	9.86492	99
400	RM12995	ATTCCTGTTCTTGATCGCTCTGC	TCTTCGTCGACGTCCATGTCC	2	10.7825	197	2	11.5409	197	2	9.8707	197
401	AUT12996	CACACGATCAACTGAATATGCACACG	GTCGTTCGACTTGAGACCGATGG	2	10.7838	484	2	11.5422	426	2	9.87207	599
402	RM12997	ACTGGACGAGTAAGTTTGCTTGG	CAGTGGCATGTCAAACAATACC	2	10.8217	451	2	11.5852	577	2	9.92681	384
403	AUT12998	ATGACCCAATTTCTGACTCTAGCC	CATGGGTGGTGCTGTAGATGG	2	10.8359	456	2	11.598	474	2	9.94095	472
404	AUT13008	AAAGGCGGAGGAGAAGGTATGG	CTTGGAACGAACGACCAACTCC	2	11.0342	152	2	11.8001	152	2	10.1341	139
405	RM13010	CAGTATGGTCACAGGAAACAACC	CTTTGTGATCCTCTAATGGTCTGC	2	11.0977	223	2	11.8609	220	2	10.1922	214
406	RM13013	CCCGTTAGGAGCCTTTCACTGG	GTTGCTCAAGCGGTTGCTCTCC	2	11.1815	77	2	11.9429	86	2	10.2746	80
407	RM13016	GAGTATCACTTGATAGCTTGGGAACG	TCCTGCTATAGGCTAGGTTGTAACG	2	11.2748	353	2	12.0379	357	2	10.3709	349
408	AUT13017	TTTATTCCGTCCAAGCTGTTCG	GGGTGATTTGGCTAAACTATGTGC	2	11.292	316	2	12.0549	304	2	10.3878	318
409	RM13018	CACACCGCTGTATAGTACAAAGAACC	GCGTAGGCTGTTGTTTCAGTATGG	2	11.3015	142	2	12.1014	192	2	10.3973	140
410	AUT13019	CCAAATACACCAGAGTACATAGGC	CCAAGGTTTACGAAATCTGTCC	2	11.3654	198	2	12.1537	206	2	10.4633	758
411	RM13020	CATGATCGACCAGGCCTAAAGC	ACTGCCCACTTGCATCTCTAACC	2	11.3702	323	2	12.1585	269	2	10.4687	272
412	RM324	CTGATTCCACACACTTGTGC	GATTCCACGTCAGGATCTTC	2	11.3897	133	2	12.1992	178	2	10.5221	201
413	AUT13021	GATTCCACGTCAGGATCTTCTGG	GCTCACCAGTTGAGATTGAAAGG	2	11.4188	195	2	12.1992	240	2	10.5221	263
414	RM13024	GGGCTAATCGGGAGACAGTTCACC	GCGTCCATCAAGGTGCTCAACG	2	11.4923	92	2	12.2772	92	2	10.5945	90
415	RM13025	CTGAAGTGCCCGCTTGTGTGG	TGTTGGGAATCTCTCCCTCTATCTGG	2	11.4956	278	2	12.2806	270	2	10.5978	278
416	RM13026	CGATCATCGGAACTTGACAGG	ATCATCCCTTGGAGAGGGTAAGG	2	11.5208	226	2	12.3061	226	2	10.6235	214
417	RM13027	GGACTTGACAGGGACGACATGC	ACCATCGTGCATTCACTTCTGC	2	11.5293	339	2	12.3143	336	2	10.632	357
418	RM13028	GGACTTGACAGGGACGACATGC	ACCATCGTGCATTCACTTCTGC	2	11.5293	339	2	12.3143	336	2	10.632	357
419	RM13030	ACGTTCGTACGATAACACATGACG	GATGAGGCTCTTAAACTCCTAAGTGG	2	11.5431	194	2	12.3283	193	2	10.6453	191
420	RM13034	CAAACTTTAAACGGCCACTTCC	TCGGCATTATACTGGTCTTTGG	2	11.6192	248	2	12.4119	272	2	10.7212	252
421	RGNMS883	TCCGATGAGTTACACTACTACG	CATTCAGACAGACAATTACCAG	2	11.6224	362	2	12.4151	362	2	10.7244	362
422	RGNMS863	AGTATTTAGGAGGTTGCCACTA	TGGTACTACGACCTTACCCTAC	2	11.623	281	2	12.4157	281	2	10.725	281
423	RM13035	TTCTTCCAGATCCGTATGAACG	TCGAGATCAACAAGAACACACTCC	2	11.6245	295	2	12.4172	287	2	10.7265	295
424	RM13037	ATCATCGATCCCATTGTCAACC	TGCATAGCGATCGAGTTAGTACG	2	11.6297	88	2	12.4224	96	2	10.7317	92
425	RM13038	CCTTGGTAGGCACATGGTATCG	CAACCATTTGCTGAGAGATAGACG	2	11.6715	360	2	12.4479	420	2	10.771	402
426	RM13042	ACTGGCGTTACCTTGTTGGTAGC	GGTAGCTAATGTGTGGCTGACTGC	2	11.7166	204	2	12.4855	184	2	10.8126	188
427	RM13044	GCAGCAGTCAATGTCAATCAATGG	ATGGTCGACAAGATCGCCTTCC	2	11.895	196	2	12.6313	188	2	10.9802	196
428	RM13045	AGTAGCCAACACATCGTCCATCG	CGTCCTCATGTATTAGGGTGAGAGC	2	11.92	478	2	12.6563	452	2	11.0053	485
429	RM13046	GCCATAACAGAAAGGTCACATGG	CACCTACCATGACTTGTCACATGC	2	11.9245	173	2	12.6608	161	2	11.0097	167
430	RM13051	CTGCGTCCTTCCTCCTCTTTCC	CTGCCTGATGAATCTCGCAACG	2	12.048	171	2	12.7651	149	2	11.1386	171
431	RM13055	CCTTTGCTCTAATCACCACTTGC	GTGTGGTAAGTTAGGGAATGAGTTGG	2	12.1352	212	2	12.9128	207	2	11.2152	208
432	RM13056	CCTGTCTCGATCCCGTATGTCTTTGC	GGGAGGGAACACAGAGGAGAAGAGG	2	12.1405	189	2	12.9181	206	2	11.2203	187
433	RM13061	CTCCCTAAACATTCAAGGCAAGG	GCTATGGATCTTCGGTAGTGTTGG	2	12.2204	124	2	13.0097	121	2	11.3025	121
434	RM13063	CATTGGATCTATGCTACTCACC	GTGTGAACCTATTTGACTACCC	2	12.2978	281	2	13.107	256	2	11.3947	231
435	RM13065	GCAAGAGGAGGAATGCAAGAGC	TCACTCCCTGCACAATACACTGG	2	12.4734	148	2	13.2723	151	2	11.5663	148
436	AUT13066	GCTCTGGTCCGAAGTCTTCTTCC	GGCTAAGCCCACATGAGACAGG	2	12.4933	260	2	13.2922	257	2	11.5862	254
437	RM13070	CCACCGGAGATCATAGGTTCG	AAGTTAGCCCTCAACCGCTATGG	2	12.6479	461	2	13.4628	486	2	11.7451	311
438	RM13073	AGCAGCCATGGGAGGTTACACG	GCCATGTTCTCCGGTGTTTGC	2	12.6861	88	2	13.4999	88	2	11.7816	88
439	AUT13075	AGAGCAGTTGGAGACGACTTTCC	ATGTGGACATGCCCTCAGTAAGC	2	12.6958	263	2	13.5096	247	2	11.7913	237
440	RM13077	CATCAGGAGGCGAGAGGTGAGG	CCGTTTCTGCCTCACTTTGAATCG	2	12.8461	136	2	13.7683	166	2	11.9974	138
441	RM13079	TTTCCTATGGGATTGGAGAACC	GCAATCGCCTTGAAGTTATGG	2	12.8927	419	2	13.7866	409	2	12.0394	421
442	RM13080	TAGCTAGTACAGCAAGGTAGTCG	CTCTGTGACAACTAGCAAAGC	2	12.9041	68	2	13.7978	68	2	12.0507	68
443	RM13081	GGCTTCGTCAGACCTTGTCTTCC	GCACGCGGGAAAGTAATTAAATCG	2	12.9237	271	2	13.8184	271	2	12.0701	262
444	RM13082	GGCCCAAGAACAAGAATCAAACC	CACGTCGTCTCCAAGGTTTCC	2	12.9606	153	2	13.8641	145	2	12.1063	145
445	RM13083	CGATGAGGAACGCGAGGAACG	GGAGTGGTGGTGGTGGTGAAGC	2	12.9608	252	2	13.8643	252	2	12.1065	252
446	RM13084	GCATGCTAACTTGACATGACTGC	TACAGTGTGTTGTGCATGTTGG	2	12.9677	371	2	13.8713	379	2	12.1135	331
447	RM13088	GTGCAACGACTTCATTCAACC	GATGGTTTCTTACGGTCTCATGG	2	13.0949	399	2	14.0054	391	2	12.2526	397
448	RM13090	ACCAGCTTGGGCGAGTTAGAGG	CTCCACCTCCACTTCCTCATCG	2	13.1563	89	2	14.0937	83	2	12.3114	89
449	RM13091	TGGGCACTCAATTGTTTCTAGACC	AGCCGTCGGATCTAAGTCATAGG	2	13.1665	240	2	14.1019	250	2	12.3234	204
450	RM300	GCTTAAGGACTTCTGCGAACC	CAACAGCGATCCACATCATC	2	13.1914	163	2	14.1258	124	2	12.3509	145
451	RM13092	TCCAGAGGTTTATCGTGTTCAGG	TGACTCGTGTCTTCAACTTCTGC	2	13.2032	256	2	14.138	251	2	12.3608	256
452	RM13093	CTGGCTTGATTGTTGAACATGG	CTTGCCACCACACATAATGTTCC	2	13.2074	161	2	14.1422	207	2	12.3651	163
453	RM13094	CAGAATGGAGAGAGAAGGATTGC	AATTCCTAGCTACGCCACTGC	2	13.2122	229	2	14.147	227	2	12.3699	227
454	AUT13097	GGGCTTAAGGACTTCTGCGAACC	AGCGATCCACATCATCAAATCG	2	13.2204	161	2	14.1558	122	2	12.3809	143
455	AUT13100	CTTACCTGTGCGCTACAATTTGG	CCCTTCAGAAGACACACAGAGG	2	13.334	280	2	14.3303	278	2	12.5	280
456	RM191	cccatcctcaccgatctctctaaac	gtgcgcacggaggaggaaaggg	2	13.3968	226	2	14.4017	226	2	12.5643	226
457	RM13101	CCTAACATCAGCATTGTGACTTCG	CGTTGCTTCACAAATCAAGTAGGC	2	13.4383	289	2	14.4434	227	2	12.5903	231
458	RM13102	CCTAACATCAGCATTGTGACTTCG	CGTTGCTTCACAAATCAAGTAGGC	2	13.4383	289	2	14.4434	227	2	12.5903	231
459	RM13114	TGTTGTATGCTATGGTGGTAGGG	GTTGCGAACAAGGTAATCATCG	2	14.7418	247	2	14.7847	294	2	13.1064	243
460	AUT13122	CCGCATCTGCACCTCTAAATCC	GTACACGCCTGTAGCTCGTTGC	2	15.1101	86	2	15.1967	104	2	13.4009	80
461	RM13123	AGTAGGTGGATGAGCAGATGTGG	CATCACTCCTCTCCAAGAAAGAGC	2	15.1135	491	2	15.2002	431	2	13.4043	414
462	RGNMS554	CTAGCATCTTCTTCCAATATCC	TAAGCAACATTTGTAAGAGTGG	2	15.115	343	2	15.2016	343	2	13.4057	343
463	RM13124	GCCTAGGCTGTAGGAGATATGC	AAGCTCCTTAGGGTCAAATAGC	2	15.1151	151	2	15.2017	151	2	13.4058	151
464	RM13129	GTTGACCGGTTGACATAGTGAGC	GGAGCTCTGACTTGGTGATTTACG	2	15.2227	160	2	15.3581	154	2	13.4792	150
465	RM13132	ATATCCCTGCCAAAGCATGAGC	ACATAATTGTGCCTCCTCCATCC	2	15.2856	174	2	15.4225	172	2	13.5405	172
466	RM13133	GAGGATTTCCGTGGGAATTATGC	AGTCAACAGCGAGATCAGTTAAGAGG	2	15.2881	171	2	15.425	176	2	13.543	171
467	RM13134	CCGATCTTTAACTGAGGTGAGAGG	TGAGACGAGAGATGAGAAGAGTGG	2	15.3279	286	2	15.4669	455	2	13.5789	204
468	RM13135	CCGATCTTTAACTGAGGTGAGAGG	TGAGACGAGAGATGAGAAGAGTGG	2	15.3279	286	2	15.4669	455	2	13.5789	204
469	RM13149	AGGGAGCAGAGGTGGACTTAGC	CCACGATATGAGCACCTAACACC	2	15.6788	199	2	15.9295	198	2	13.91	199
470	RM13150	CAAAGTCCGAAGGAATTGTACTGC	GATGCGGGAGATTATGCATGG	2	15.7137	385	2	15.9904	411	2	13.9332	379
471	RM13152	AGAGGGTAGCGAAGCGAAGTAGG	CTCTTGCGTGCTTAACTCAGTGG	2	15.724	134	2	15.9991	134	2	13.9436	134
472	AUT13153	TCACCAGACTCAACAAAGGATCG	TTCACCTTTCTTCTCCCTCATTCC	2	15.9667	260	2	16.2588	269	2	14.1942	242
473	RGNMS685	TGACAATATTGAGTTTACTCGG	AATGTTCGCAATAATACTACCC	2	16.0055	326	2	16.2977	318	2	14.2329	272
474	RM13159	GGGATTAACACGACAAGCTAATGG	CTGCCAGAGATCAAGCAGAAAGG	2	16.1759	597	2	16.5811	570	2	14.3969	586
475	RM13164	ATGAGCCTCACAACACCAATGC	CCTTCAATACCGCTCATTTCTTCC	2	16.2604	197	2	16.68	191	2	14.4768	194
476	RM13166	CATCGTGTACCACCTGCAACG	CACCCGATCTGTGACCTGACC	2	16.4258	95	2	16.8288	95	2	14.6628	95
477	RM13167	GGCAAAGGATGTCAAGTTTCATCG	CTCCCTCCATTGACAAATGTAAGTCC	2	16.4296	476	2	16.8335	458	2	14.6666	478
478	RM13172	CATTGACTCATTGAGGTTAGGG	CCTCGCTAACTGCCTTACTAGC	2	16.6084	392	2	17.0323	360	2	14.8561	386
479	AUT13173	AGGAAGTCGAAGTTCGTGTTTGG	AGGCGAGAGGTGAAGGAATTAGC	2	16.6305	134	2	17.0544	126	2	14.8782	130
480	RM13174	GGGATTCCTCGATCCGCTACC	ATTCCAGAACTGCCTCGTCACC	2	16.6446	93	2	17.0684	87	2	14.8921	93
481	RM13180	AGGAGGACGTTGGTGGCGTACC	CGGCGATGCCAGATACAGATTGG	2	16.6901	193	2	17.0978	193	2	14.9368	193
482	RM13181	TAGGAAGGCAAGCAATGAACAGG	CGAGTGTATGGTCAGGTTGATGG	2	16.7478	262	2	17.1588	258	2	14.9944	250
483	RM13190	AAAGATACCGGGCCCACACAGC	GCTCACCTGGTTGAGGCTCTCC	2	16.9811	456	2	17.3821	442	2	15.1961	460
484	RM13194	ATTAGTGGGAGCTGTTGGGCTAGG	ACGCAAGCATTGATGGAGTGG	2	17.1495	488	2	17.5375	482	2	15.3341	488
485	RM13197	AAACCCTCCGGCTCATTCTTGC	ACTCGAATCGTATCGGCTTGAGG	2	17.2245	182	2	17.6438	185	2	15.4127	179
486	RM13199	AATCCCTCTCCCTGGCGAAGTCC	CGTCCTCACCACCAATCCCTTCC	2	17.2472	184	2	17.6665	188	2	15.4364	182
487	RM13200	GATGGCAAGATCAACATGGTACG	TGATTGGGATTAGTGAGCCATCG	2	17.2496	229	2	17.6689	229	2	15.4388	229
488	RM13205	GGAGAAGAGACGGTGGCTGTTACC	TTTGCCTTTGCCTCCCTCACC	2	17.3242	272	2	17.7363	285	2	15.509	271
489	RM13206	GTGGTCTTGGCGACCTTGTAGC	GCGTTGGTTCGATCTTCTTCG	2	17.3314	266	2	17.7435	254	2	15.5161	266
490	RM13208	ATCTGGAAGCCGATCAGCAAGC	GCTGTCATCAAACCTGCTGTTGC	2	17.4121	287	2	17.8327	287	2	15.5973	287
491	AUT13210	ACACACCCTGTCGGTACAATGC	CAGTGACACGTGACATGGATCG	2	17.4572	193	2	17.8735	196	2	15.6406	193
492	RM13213	GTTTCTCCACCACCGTCAGTCG	CCCTCACTTCACTAGTCCGTAGCC	2	17.5286	190	2	17.9432	244	2	15.7133	287
493	RM13219	CAGTGAGCCAGAGAGGAGACG	TGACTCGATGGGATAGAAGATGG	2	17.7024	456	2	18.1656	453	2	15.8993	471
494	RM13224	GGCCTGCACGAATATAATAGACATCG	CCTCCTCCGTAATGGTTAATGTTAGG	2	17.7726	664	2	18.2509	688	2	15.9491	638
495	RM13225	CTGCCTCTGGGACTTGATCACC	CCGAAACCTGACATTGTTCACC	2	17.777	441	2	18.2553	430	2	15.9535	437
496	RM13226	GAGCAAATGGGTTGTTTGAGAGG	GGCTCTCTTACTTTCTCCTTCATGG	2	17.7819	190	2	18.2602	190	2	15.9584	184
497	RM13228	CGGCTGAAACCAAATAGTGTCG	GTGGAACGGAGGGAGTAGTTTGC	2	17.8742	260	2	18.3521	208	2	16.0462	226
498	RM13231	GTACGTCTGCGAGCTCTCCTTCC	GCTTGCCAGCTTGGTGAGTAGG	2	18.0219	438	2	18.5401	350	2	16.1875	354
499	RM13232	GTACGTCTGCGAGCTCTCCTTCC	GCTTGCCAGCTTGGTGAGTAGG	2	18.0219	438	2	18.5401	350	2	16.1875	354
500	RM13233	CCCATGTATACCTGACTGTAAGAGG	ATACTCATCTATGGCGGTTTCC	2	18.1205	277	2	18.6201	271	2	16.2806	271
501	RM13242	TAGCTAGACTCCATCCTTGCACTCC	ACATGTAGCACGTTTCTCCATCTCC	2	18.266	694	2	18.7701	425	2	16.4366	636
502	RM13243	GCACTCCAAGCAACACTAATCTCTCC	CACATGTAGCACGTTTCTCCATCTCC	2	18.2661	677	2	18.7701	408	2	16.4366	619
503	RM13244	AGAGAGGGAGAGACGCGCTACG	CTGCCCGCTACTGCAAACTACC	2	18.2668	132	2	18.7705	110	2	16.4372	116
504	AUT13252	ATGAAAGCCCATCTCAACTCAGC	GAAGAACGGAATGTTGTAGCTTACCC	2	18.6251	196	2	19.0467	190	2	16.7023	190
505	RM13254	CAGAAGCCTTCATCCCAGATAGG	CAAACGGGATCACCATCTTCC	2	18.6541	393	2	19.0964	467	2	16.7313	456
506	RM13256	CCCTAGTTGAATCACTCCCTGAGC	TGCTTATGGAAGACGAGAGAAGAGG	2	18.7516	160	2	19.1832	153	2	16.818	164
507	RM13257	ACTGTCGCCACTGTGACTGTCC	ACCACCTCACCGTCTCTGTCC	2	18.777	170	2	19.2078	170	2	16.8431	170
508	AUT13260	AGTCCAAGAAAGGCACGAGAGG	CTGCATCGAAGAAGAAGAAGAAGC	2	18.8485	192	2	19.3921	138	2	16.9149	135
509	RM13263	AAGATTGCACACTGGTGTTCTCC	AGAAGAGCCGGTCTTTGTCTCC	2	18.8662	154	2	19.4123	139	2	16.9343	114
510	RM13264	ATCTCCATCGTCTCCTTCCTTGG	CGTACAGCCATATCCAGCAAACG	2	18.8715	156	2	19.4176	156	2	16.9395	156
511	RM13265	CTTGTGCTAACGTGCCAGATACC	CCTAATCCCTACGGTCAATGTGC	2	18.8931	193	2	19.4472	190	2	16.9604	196
512	RM13266	GGACTAGGATCATCCCGTTTCC	TTCTAGGAGGTGGTGAGATGAAACC	2	18.8961	492	2	19.4502	486	2	16.9633	492
513	RM13268	CCCAAACATCCAATACGACACC	GACGAGCCACCACGTTAGTACG	2	18.9025	191	2	19.4565	570	2	16.9698	203
514	RM13269	GCTTCGGTAATTTGGTTTCGTGATCC	GACCACGTGACGTTCCAAGACG	2	18.9168	99	2	19.4797	90	2	16.984	99
515	RM13275	CTCGAATAACTGGAGAAGGAAACG	GTGGCTGCATGTAGAACCTCTCC	2	19.1562	488	2	19.7041	484	2	17.2112	482
516	RGNMS935	CCTAGTATACCTAGCACGCAA	TCGATCTCTCTTCTTCTAGCTC	2	19.1938	232	2	19.7422	226	2	17.2536	230
517	AUT13277	GCGCGTAGAAGTAATACCGATGG	ATATCGTGGAGCTCTCTTTCTACGC	2	19.1996	325	2	19.7481	321	2	17.2594	325
518	RM13279	CATGATCAGTCCGTGTCATCACC	AGCTATTGCAGACCGGGATACG	2	19.2324	294	2	19.7825	298	2	17.2912	294
519	AUT13280	GATCGACCTCCACACACTTGTCC	CTCAGCTTACCGTGCGACACC	2	19.2331	169	2	19.7832	167	2	17.2918	167
520	AUT13281	GACACGGGTTATCAGTGATGTCAGC	GCCATCACGCATGTTAGTTAGAAACG	2	19.2352	153	2	19.7853	145	2	17.2939	153
521	AUT13282	CCATTAACGTTGCAGGTGTCTGG	CCTCCGAACCATAAGTCCATAATTGG	2	19.2375	189	2	19.7876	184	2	17.2963	189
522	AUT13285	CCTTCTCCCTTAATTAACCCTTCC	GATTCATCACGAGAGCACAAAGG	2	19.3146	175	2	19.8902	133	2	17.3665	160
523	AUT13288	AGAATACGGATGGGCACAATGG	TATTCTTCTGGTGTGTGCCTTGG	2	19.4174	264	2	19.9958	208	2	17.4687	221
524	AUT13289	AGAATACGGATGGGCACAATGG	TATTCTTCTGGTGTGTGCCTTGG	2	19.4174	264	2	19.9958	208	2	17.4687	221
525	RM13291	CCCTCTCCAACAAGAACCAAACG	ACCTCCACCTCCACCACTGTAGC	2	19.4208	224	2	19.9992	218	2	17.4718	215
526	RM13292	CCCTCTCCAACAAGAACCAAACG	ACCTCCACCTCCACCACTGTAGC	2	19.4208	224	2	19.9992	218	2	17.4718	215
527	RM13294	TCCTTCCTTGAATCAACCTGACC	TCAGGCTCTCAGCTTCTTCTTCC	2	19.4222	206	2	20.0006	208	2	17.4732	210
528	RM13296	GGGTGGTGTAACGGAGAGATAACG	CTCTTCCCTCCTTCCTTCATGC	2	19.4408	122	2	20.0191	106	2	17.4917	126
529	RM13297	GATTTGGGCATGATCCTAAGAGG	GTGCATGGAACAATGGAAGAGC	2	19.443	95	2	20.0213	91	2	17.4939	91
530	RM13303	AGCGTAAGCCAAATCAAGAGTGC	GTGCGTATCTTTAACCGGTCTCG	2	19.7093	235	2	20.2264	169	2	17.6759	195
531	RM13305	AGCTATGCCAAACTGTCCAAATCC	CTGCCCATGGGAGAGGTAAAGG	2	19.7325	263	2	20.1447	250	2	17.6988	258
532	RM13308	CAAAGGCGGATTCTCATTAGACG	CAATCGACAGACACAGTTGTTCG	2	19.7599	156	2	20.267	142	2	17.726	142
533	RM13309	TTGCTCAGAGTGATTCAGTTGC	CTCTGAAAGTGCGATAGCTTGG	2	19.7667	202	2	20.2737	199	2	17.7327	199
534	RM13310	AGCAGATGATGTATGTGCCTTGG	TGAAATCCCGACTATGGGATGG	2	19.7673	390	2	20.2744	391	2	17.7333	390
535	RM13312	CGAGGTATCTCGCCTCGTTCC	CCAACGACCACAACTACTTCTTCTCC	2	19.7821	166	2	20.2888	166	2	17.748	147
536	RM13313	ACAATTCACAGAACCGAGAGACG	CTGTCTGCCGTAGCTTTCTTTGG	2	19.7974	210	2	20.3037	227	2	17.7631	209
537	RM13314	GTCCGACCCAGCAGAAGTAGAGC	CTCACCTGCTCCCGATCATCC	2	19.8747	299	2	20.3784	299	2	17.838	299
538	RM13315	GGTCGAGCTTTCTGATCAATCG	GAGCTCCTCCATATCGTCATCG	2	19.9118	177	2	20.4165	177	2	17.875	177
539	RM13320	GAGACAGTAGTCCGTCCATGAAGC	GTAGCTCCGGCCGAAGTAGTAGC	2	19.9428	274	2	20.447	274	2	17.9059	274
540	RM13329	AGCTTGGCTGGCCTAACTTGC	CCTTTGGCGCCACACTATCTACC	2	20.0315	99	2	20.5378	99	2	18.0053	99
541	RM13331	GGCTATCCTGAAGCTCCGTTGC	CACGAGGAGTACGTGCACAAGC	2	20.0446	192	2	20.5501	192	2	18.0182	192
542	RM13335	TATGCCAAGAGGAATCCTGAAGC	GCACTCACACTGATCTGGACAGG	2	20.0777	299	2	20.5953	299	2	18.0504	297
543	RGNMS808a	TGAAGATTTCAGACTTTCATCA	CATCAAAGAATGACTTTCACTT	2	20.0837	133	2	20.6014	128	2	18.0564	133
544	RM13342	ATCAACATCCTCCTCGACTTTCC	CACTGGGCCTAGGTTTCTCTGC	2	20.152	180	2	20.6676	189	2	18.1237	180
545	RM13344	GGAGACGGAGGAGAAGCCATCC	ATGCGACTTCAGCGCAACTCC	2	20.1896	338	2	20.7039	338	2	18.1606	338
546	RM13345	CTTCTCCTGCTCCTCCCGATCC	CTTCCATGGCTGTCCGTCTTACC	2	20.1999	167	2	20.714	203	2	18.1709	167
547	AUT13346	GTAAGACGGACAGCCATGGAAGC	GACAGCACCTGCTCGAACTGC	2	20.2	187	2	20.7142	175	2	18.1711	187
548	AUT13347	TCCTTCTCCTTGAACAGCGACAGC	AGAGGCGAGAGGCATGGAGTGC	2	20.2125	170	2	20.7633	146	2	18.1835	170
549	RGNMS590b	TAGGGTAGCTACTGCTAGTTCC	CTCTGCAGGTGCTTCTCTGCT	2	20.2127	116	2	20.7636	112	2	18.1838	116
550	RM13349	GGACCCAGTTTGTTTCTTTGTCC	GCCAACACTCTTCTCGCTCTACC	2	20.235	161	2	20.7859	163	2	18.2061	153
551	RM262	CATTCCGTCTCGGCTCAACT	CAGAGCAAGGTGGCTTGC	2	20.8008	140	2	22.8336	154	2	18.2189	140
552	RGNMS766b	AATTTCTCTGAGCTGAAACTGT	GATCAGTTTCTTCACCTCAAGT	2	20.3309	173	2	20.8992	173	2	18.2997	173
553	RGNMS746	CATCTTGTCTATTTAAGGGTCC	TGTATCTGAAACTCATCCAGAA	2	20.3314	253	2	20.8997	255	2	18.3002	253
554	RGNMS690	CAAATAAGCTCAAACAGATGAA	CACGAAGTACAACACATCTTTC	2	20.332	324	2	20.9002	324	2	18.3008	324
555	RGNMS792	ACCAGATATGTGAGATCCCTT	TTCTTAATTGCTGGCTAGCTT	2	20.3425	354	2	20.9142	354	2	18.3097	354
556	RM13352	CAGTCGTTTAGAAAGCGGTTTAGG	TGATGTTTCGTGCTCTAGGAAGC	2	20.3492	255	2	20.9233	253	2	18.3164	253
557	RM13354	CAACGATGCCCTTTGAGTTTACC	GCCTTGGTTAGCATACATCAGACG	2	20.4138	611	2	21.1164	609	2	18.4226	609
558	RM13355	TCTAGGACTTGAAGGGATGTTCC	GCTTCTAGACTCTGGAGTCACTGG	2	20.445	287	2	21.147	287	2	18.4535	292
559	RGNMS794	TTTCTTCTGTCCTCGAATAGTT	ATCAAGTCAGAAGCGTTAATTT	2	20.4499	195	2	21.1516	195	2	18.4584	195
560	RGNMS2921	AATATTGACCAACTTGATAGGC	TAATAAAGCCCTGAATGAGTTT	2	20.509	210	2	21.208	204	2	18.5169	210
561	RM13356	TAGCATTCCACTTGCAGAACAGC	AATTGCCTTACCATCCGTCTGC	2	20.5736	280	2	21.2788	282	2	18.5816	278
562	RGNMS2970	TGCAGTAAGATAATATCAAAGCC	TCTTGTGCTAACACCAATTATC	2	20.5737	109	2	21.2789	111	2	18.5817	107
563	RGNMS491a	TGCAGTAAGATAATATCAAAGCC	TCTTGTGCTAACACCAATTATC	2	20.5737	109	2	21.2789	111	2	18.5817	107
564	RGNMS2755	TTCTTGTGATGACTTCCTTGTA	GTTACTGTAGCAGCTGCCTTAT	2	20.575	302	2	21.2802	302	2	18.583	302
565	RGNMS492	TTCTTGTGATGACTTCCTTGTA	GTTACTGTAGCAGCTGCCTTAT	2	20.575	302	2	21.2802	302	2	18.583	302
566	RGNMS904	TTCTTGTGATGACTTCCTTGTA	GTTACTGTAGCAGCTGCCTTAT	2	20.575	302	2	21.2802	302	2	18.583	302
567	AUT13357	CATAAAGGGACCCACTTGTCAGC	TGATGTCTGGTCCACAGTCTGC	2	20.6068	348	2	21.3177	294	2	18.6146	321
568	RM8254	CATAAAGGGACCCACTTGTCAGC	TGATGTCTGGTCCACAGTCTGC	2	20.6068	348	2	21.3177	294	2	18.6146	321
569	RGNMS2829	TTGGCTACTTGCCTAATAGAAT	TAGTATTTCCCACACAACGATA	2	20.6117	340	2	21.3255	338	2	18.6195	340
570	RGNMS2836	TTGGCTACTTGCCTAATAGAAT	CAACAATAGTATTTCCCACACA	2	20.6117	346	2	21.3255	344	2	18.6195	346
571	RGNMS537	TTGGCTACTTGCCTAATAGAAT	CAACAATAGTATTTCCCACACA	2	20.6117	346	2	21.3255	344	2	18.6195	346
572	AUT13358	GTCTTTGCCTTCTCCTACGTTGC	GACCACAATTCTACAACGCTTTCC	2	20.6496	190	2	21.4501	186	2	18.656	186
573	RM13360	CACTATTGCACTGCCTATTTCC	GCAAATCTGTTGCTCTTGAGG	2	20.7025	227	2	21.5123	229	2	18.713	221
574	RM13361	GCACTTTCATGCATTGCTTTGG	CCTGTCTGGACTGTGTTCAAAGG	2	20.748	632	2	21.5596	624	2	18.7586	755
575	RM13363	GAGATCATGAGATTGGATGCATGG	GCAACAAATAACGCCACATGTCC	2	20.7569	247	2	21.5684	244	2	18.7675	247
576	RGNMS615	TTAACACTTCCACCTAGGAGAC	ACTAAGCAACATGCAAACATAG	2	20.7771	258	2	21.5835	258	2	18.7826	258
577	RM13364	AGCTAGCGAGCGAGGAGAGACC	GCGAGGTTAAATCGGTCCTTGC	2	20.7788	240	2	21.5851	225	2	18.7843	240
578	RGNMS719	GACTGTTTAGGGCAGCTTATAG	CCCAAGTTTGATTAAGTTTGTAG	2	20.8853	277	2	21.6909	280	2	18.8923	277
579	RM13366	GAATGGACGACATGTACGACACC	GGATGACGGACGAAAGCTAAGG	2	20.8944	197	2	21.6999	206	2	18.9013	215
580	RGNMS730	TTTATGGTATTGGAAATAAGGG	AACAATTTATAGAACGACACCC	2	20.8992	200	2	21.7048	200	2	18.9061	200
581	RM13367	ACATCAATGGTTAGACACCCTTCC	TGATCGATGCGAGAACAGAGG	2	20.9138	180	2	21.7194	186	2	18.9201	180
582	RM13370	CTCCTCCTGCTTCTCGTCTGC	TCTCTTCTCCACATCACCACAGC	2	20.9149	193	2	21.7205	184	2	18.9212	193
583	RM13371	CTCCTCCTGCTTCTCGTCTGC	TCTCTTCTCCACATCACCACAGC	2	20.9149	193	2	21.7205	184	2	18.9212	193
584	RM13372	CTCCTCCTGCTTCTCGTCTGC	TCTCTTCTCCACATCACCACAGC	2	20.9149	193	2	21.7205	184	2	18.9212	193
585	RM13374	TGAGAGACCAACCTTTGAATCTGC	GTCAGCTCACAACACGCAAAGG	2	21.0023	174	2	21.8156	171	2	19.0068	168
586	RM13375	CTGAGGAGAAGGAGAAGAACG	AGCTCAAGCTTGCTACTGACG	2	21.0107	184	2	21.824	178	2	19.0153	184
587	RM13377	GCCGAGCAAGTAAAGCCTGTAGC	CATCATGACGGCCAGAAAGTCG	2	21.0169	96	2	21.8345	82	2	19.0215	82
588	RM13386	CACTCTGAACTATTGTGCTCTCG	TAAACCTGGCTCTATGAGATGG	2	21.1566	449	2	21.9351	401	2	19.1448	485
589	RM13387	AGAGATAGGGTGGGCTCTTGAGG	TGCTACTCCTGAAGGTGGTGAGG	2	21.1635	167	2	21.9452	143	2	19.1514	169
590	RGNMS580	ATATGAGATGTTTGGAACACAA	TTCCATGGTAAATGCATACTAA	2	21.1708	248	2	21.9526	279	2	19.1587	238
591	RM13389	AAAGACATGTCAGTGCACACATCC	CGATCTAGGAGCGTTGTAGAAGTGC	2	21.1872	266	2	21.9775	251	2	19.1749	262
592	RGNMS2914	CAGACCGTTTATGTTGTATTTG	TGTCAATATTAGGCATAGCAAG	2	21.2411	187	2	22.0411	187	2	19.2286	187
593	RGNMS668	CAGACCGTTTATGTTGTATTTG	TGTCAATATTAGGCATAGCAAG	2	21.2411	187	2	22.0411	187	2	19.2286	187
594	RGNMS2950	GTGACTAGAGGTTGAGACCAAT	AAGTTTGACTTGAAACATCTCC	2	21.2423	145	2	22.0422	145	2	19.2297	145
595	RM13390	GGGATGTTTGTACTTCACGTTCC	ACAGCTGCTGGACACTTAGTACC	2	21.2479	284	2	22.0478	291	2	19.2353	284
596	RGNMS670	AGCTAACAGCTAACCACAATTT	TGTCAGCAGCTATGTGTTCTAC	2	21.2486	176	2	22.0486	176	2	19.2361	176
597	AUT13394	TCGAGGCAATTCCTAAGCTAACC	TCTGGAACCTCTTCTATACCCAAAGG	2	21.3589	392	2	22.1118	368	2	19.3302	454
598	AUT13395	TCGAGGCAATTCCTAAGCTAACC	TCTGGAACCTCTTCTATACCCAAAGG	2	21.3589	392	2	22.1118	368	2	19.3302	454
599	RM13397	CAGCACGAATGCTCCTAACAACC	GCTACTGCGAGTTTAAACCTTGTTGG	2	21.3934	171	2	22.1501	171	2	19.353	171
600	RM13400	CACGAATCTTGAGGCACATTGG	AATTTGCTTAGCTTGGCCTCTCG	2	21.4429	219	2	22.2058	273	2	19.4029	221
601	RM13401	AATGACACCCGAACGTAACAAACC	CTCTCTAGCACCGTCCTCATGC	2	21.4614	379	2	22.2467	405	2	19.4213	383
602	RM13402	GGGCATGCTCTACCACTCTTACC	CTCACCAAAGATTCGGTATGTGC	2	21.4787	248	2	22.2652	244	2	19.4362	240
603	RM13403	GTGCTCCTCTCCGTGCTATGC	TACGTAATGCGGTGCTCCTTGC	2	21.4815	301	2	22.268	304	2	19.4389	301
604	RM13407	TTTCCCATCTCTTCTCTCTTCACC	GTGAGTGAAATTCGACCAGTGC	2	21.6127	355	2	22.3863	1300	2	19.5728	666
605	AUT13408	GCGCACGATACCATGTTTATTGG	AATCCGTGCGAGTTGACAGTGC	2	21.6359	461	2	22.4105	311	2	19.5964	475
606	RM13409	GAGAAGAAGATGGTGGCTGTGACG	AGGCTGAGCAAGAGCAGCAACG	2	21.6404	197	2	22.4148	197	2	19.6008	197
607	AUT13412	GAAGGTGGAAACTGTTGTTCAGG	GACAGTTTAGCCTGTACTCCATCC	2	21.7605	386	2	22.5357	380	2	19.7177	378
608	RM13414	CTTGCTTTCCACAAATTCCTACCC	CCAACCCTCGCAAGCTACTCC	2	21.8241	173	2	22.5955	170	2	19.7774	173
609	AUT13415	GCACTCAGCACTCCTTGACTTGC	AATGGGAAGCTTGCTGATCTTGG	2	21.8305	143	2	22.6018	135	2	19.7838	159
610	AUT13416	TGAGTGTTTGCGGGAGGAGAGC	CAGGGTGAGAGGTTCCAGTCAGG	2	21.8353	283	2	22.6066	274	2	19.7886	283
611	RM13418	CTTCTTCCTCCCATGGTCTCTCC	CGCGTCGTCTTACATCTCACG	2	21.844	160	2	22.6152	148	2	19.7973	154
612	RM13421	CTCGGTCTCCTTCGCCATGACC	GATCGCCAGACCTGCACTTTCC	2	21.8547	171	2	22.6259	159	2	19.808	171
613	AUT13422	GTTGCAGGACAGCAGGAACAGC	CACTCCACCATTCCACCAACTAGC	2	21.9191	271	2	22.7258	256	2	19.8684	271
614	RM13423	GTTGGTGGAATGGTGGAGTGAGC	ACCCACGTAATCCCATCCTCTCC	2	21.9194	157	2	22.726	162	2	19.8687	157
615	RM13424	TCAGTAGCGAAACCACTTCTGTTTGC	GAGGTGGAGGGTTTGGTGTGG	2	21.9318	105	2	22.7384	105	2	19.881	105
616	RM13425	CAGCATGTGTCGTCTTTGTCTCC	TTGCGTGATAGCACACCTAATCC	2	21.9479	453	2	22.7619	439	2	19.8972	438
617	RM13426	GTGTCCCGCGCTTTCTCTTCG	GCTCACCAAGCACTCGACTCACC	2	21.9564	142	2	22.7704	142	2	19.9056	142
618	RM13427	CATTGCACCTGTAAGCCTGAGC	TCGCCGATTCAATCACTCTCG	2	21.9685	117	2	22.7825	125	2	19.9177	114
619	RM13430	CGCCTACATTCTTGTCTCAACC	GGAGAACTCTGCATTCTTATGAGG	2	22.0061	295	2	22.8198	269	2	19.9561	275
620	RM13431	TGCTCTCGATGTCGTAGTTGTGG	GAAGCCAAGCAAAGAAAGTCTCG	2	22.0144	171	2	22.8281	171	2	19.9644	171
621	RM13432	CCACCCAAGCAACCAAATAAGG	AGGGCAGGGATTAGAGGTAATGG	2	22.0503	166	2	22.8585	146	2	19.995	91
622	RM13433	TGGACAACCCTAAGACCAAGAGG	CACTGCGGTTTCAGCTGTTAAGG	2	22.0887	179	2	22.9005	175	2	20.0309	173
623	RM13435	GCTCATCGTGAGCACAATTTCG	TAGTAGTGCGATAGCCGGAGAGG	2	22.1009	112	2	22.9126	104	2	20.0431	112
624	RM13438	GGATGGATCAAGACCCTTCACC	AAATCCGAGCCAAATCCTTTCC	2	22.1874	200	2	22.9857	200	2	20.0835	200
625	RM13439	AGACGAGACGATCTCCAATTCTGC	CGATCGCATCCGAATGTACTGC	2	22.1877	137	2	22.986	147	2	20.0838	137
626	RM13441	GATGCACATGCAGTCAAACATCC	CTTCTTGTGTCGTTGCTACCTTCC	2	22.2303	86	2	23.0217	82	2	20.1216	86
627	RM13443	CCTAAAGCAATGACGAACGAAGC	GCAACTCAAACGTACGACAATCG	2	22.2525	181	2	23.0466	223	2	20.1436	211
628	RM13444	GTACGAGTACAGACCCAGCTTCG	TCAGAGACCACTCGTCTTCTTCC	2	22.2714	144	2	23.0874	144	2	20.1615	144
629	RM13445	GTGTTGTTTGGGATGCTCTTTGC	GAACTTCTCCACATCTGCACAACC	2	22.272	96	2	23.0879	96	2	20.1621	96
630	RM13447	CCAATTAGGCACACAGAATGAAGG	CTCTCTCCTCCCGGTCTTCTCC	2	22.2982	222	2	23.1141	220	2	20.1877	244
631	RM13449	AGGTCACTGACGCCCTTAAATCC	CTCCCAAATGAGGTTAGCTTTGC	2	22.3163	111	2	23.1328	104	2	20.2061	103
632	RM13452	CCGTGAACGCCTACTGGATGG	CTTACCAAGTGCCTGCCTCTGC	2	22.386	154	2	23.1961	151	2	20.2696	151
633	RM13453	ACGCAAATTCGAGAAAGAGTGC	GAGTTTCCACCTCGTCAGTTTGC	2	22.3904	212	2	23.2005	228	2	20.274	226
634	RM13455	TTCTTGGCCTGGCTGAAGAGC	ACCACCACCATTCTCCCTCTCC	2	22.4317	287	2	23.3323	280	2	20.3159	282
635	RM13456	CGATTTAGGCGAGATCTCTTAGTGG	CGCGCTAAAGAAGCAGAAGAGC	2	22.4776	133	2	23.3765	135	2	20.3612	127
636	RM13464	TCATACCGCTCTCGTTCGTTCG	GGGAACCTAGCAGCATCATTCG	2	22.6229	133	2	23.4828	137	2	20.4978	133
637	RM13468	GGTTCTAACGGAGAAATTTCCACACC	GCGTAGGTACCAACAGCACACC	2	22.7164	341	2	23.5809	251	2	20.5799	247
638	RM13469	GGTTCTAACGGAGAAATTTCCACACC	GCGTAGGTACCAACAGCACACC	2	22.7164	341	2	23.5809	251	2	20.5799	247
639	RM13473	GTCCAATAAGGGTCAGGTTGTGC	TGTATAAGATACGGCCCAAAGAGG	2	22.774	279	2	23.6551	181	2	20.6299	221
640	RM13474	GTCCAATAAGGGTCAGGTTGTGC	TGTATAAGATACGGCCCAAAGAGG	2	22.774	279	2	23.6551	181	2	20.6299	221
641	RM13475	CGTTTCCTCCTCCTCCCTTTCC	GACGATGACGCATACGAAGACG	2	22.7753	226	2	23.656	223	2	20.6311	226
642	RM13477	ACGGAGAAGGCGAGGAGGATGG	ATGGCGCCTGCTACGACTGTCC	2	22.7865	129	2	23.6679	132	2	20.6417	129
643	RM13478	GTAATTCTGCGTACGACGGTTGG	GAGTGTCAGCGAGAGGAGTTGG	2	22.8202	284	2	23.7062	276	2	20.6753	284
644	RM13479	GGATTTGACTCAGAAACCTTACCC	AAGCAGCAAGTCAGATTCAGTCG	2	22.832	230	2	23.7183	296	2	20.6872	216
645	RM13480	CTGGCTAGTCCCTTGAACAGTGC	AATTCCGGGTTGGTTAAGTGTCC	2	22.8487	163	2	23.7349	163	2	20.7039	163
646	RM13481	GAAGGTGGGCACATGTACTTTGG	ACGTTCTGGTCTCTTGATTTCTCG	2	22.8514	168	2	23.7376	231	2	20.7066	134
647	RM13489	CAGCTTGACGGCCATAAATACG	GGAATCTCAAACGGAGGAGACG	2	22.9538	124	2	23.8401	114	2	20.8102	122
648	RGNMS627	GCTGTCATACGAACAGATTAAA	AGAGAAGGAAGAGGAAGAAGAC	2	23.0082	213	2	23.8981	213	2	20.8629	213
649	RM13490	GGGTTGAATGTGGCATTTACTACTCG	AATATGCGCAAATCTCGCTTGC	2	23.0084	250	2	23.8984	220	2	20.8632	230
650	RGNMS798	TATACCAACATGAATACATCCG	CTCGGCTATTAGATGTACTGGT	2	23.0086	157	2	23.8985	127	2	20.8633	137
651	RM13495	CGAACCGAACTCAGCCTTATCC	TCTGTGCCACCTCCAGATCTCC	2	23.0794	189	2	23.9704	184	2	20.9291	188
652	RM13497	AGATGGCTTGCACGAACTAGAGG	TAGCGGCGATCAGATTAGATTCC	2	23.1058	572	2	23.9941	547	2	20.9559	538
653	RM13498	GTAAAGCCGCCTTGCAACCAACC	AACGCAGCCTGTAGACCATTGACC	2	23.1108	147	2	23.9991	157	2	20.9616	138
654	RM13499	CTGATCGTGACGGCAGAGAAAGC	CCAGCAATAAATCGAGGTCAAACG	2	23.1119	157	2	24.0002	150	2	20.9627	164
655	RM13500	CCTTAACCACTTCATCACTTCTCTCG	CCAACACCAACCATTAAGCAAAGG	2	23.1167	183	2	24.0047	187	2	20.9672	187
656	RM13503	CGCCTCTCAGGCTCTCACTATCC	TCCAGTGAAACAAGCCCTACTGC	2	23.1464	272	2	24.0381	276	2	20.9967	272
657	RM13504	TCGAGGAAGGTGTGCGTGATCG	TGGAAGTCGGAGAATCCCATGACC	2	23.208	268	2	24.0963	274	2	21.0543	268
658	AUT13505	CCCGAAATCCTCACCTTAATAACC	GATCTGCGCGTACTTCTTCTTCG	2	23.2482	441	2	24.136	438	2	21.0945	438
659	RM13508	AAGGGAGAGCTTAACCAGCAAGC	TGCCGAGTTTATCTGAACTTGAGG	2	23.2982	393	2	24.1862	401	2	21.1455	399
660	RM13510	CTAGAGAATGCAGCAGGCGTTGC	GCTGGTGGAGAAGCACGACTACC	2	23.3264	195	2	24.2232	195	2	21.1727	186
661	RM13514	ATCTGATGATGGCCACGACAGTAACG	TGATCTGATCCCGTATTCCCATGC	2	23.3759	134	2	24.2656	132	2	21.2189	132
662	RM13521	GTTTCTCTTGGAGCGGACAGACG	GATCTTGCCATCTGCTGCTTGG	2	23.4656	141	2	24.3341	141	2	21.2887	141
663	RM13523	ACGCCCGTGATAATACTGAATGTGG	AGAGCTGGCAGTTGCCAAAGATCC	2	23.5141	310	2	24.3871	309	2	21.3326	312
664	RM13525	CATCTGGCCATGAGCTGTATCC	AGGGAGTAGCGCTTTCACAAACC	2	23.5389	260	2	24.408	260	2	21.3556	260
665	RM13530	CATCGGGTTTCTGTTCTTGACACG	AACCCAAGGAATCGGACACAGC	2	23.5767	180	2	24.4359	168	2	21.3839	168
666	RM13541	CTCCTCGCTTCGTCCACTTCC	CCATGTGTCACCGACTCAACG	2	23.7923	75	2	24.6327	75	2	21.58	75
667	RM13542	CTTGCTTCAAGCGGTGGTGACG	CACGTCGCTCCACTCCAGATCC	2	23.7993	90	2	24.6472	90	2	21.5869	84
668	RM13543	CCGGCAACAACAACGTACGTAACC	GACAGCACGTACGCCAGGATCG	2	23.8367	157	2	24.6839	157	2	21.6249	157
669	RM13544	AATGGAGCATCAGAGCTTAGTTCG	CACGGTTTATCTTGGCTAATCACC	2	23.8545	195	2	24.7017	195	2	21.6426	195
670	RM13547	ACAGCCTCCTCCAGCTACAGACC	GGGATGACAAGATGGGTGAGG	2	23.8885	147	2	24.7381	147	2	21.672	135
671	RM13552	CAAACCAAACCGACTGATTCTGG	GCCTCTTGAATCCAACGAAGTAGC	2	23.9809	184	2	24.8403	184	2	21.7694	184
672	RM13554	GAGATGGTTACTGTTGCAGCTTCC	GCCTACACGCAGATGAAGACC	2	24.011	254	2	24.8648	254	2	21.7938	254
673	RM13556	GCATTGCACATCAATACCCTTGC	CTTGGCATTATGCAGAGGTACATAGC	2	24.1007	387	2	25.0126	395	2	21.8693	389
674	RM13562	GTTCAGGTATTTAAGCGCGATGC	GAGGACGTAGGGTTTAGGGATGG	2	24.313	192	2	25.0735	190	2	21.9969	190
675	RM13563	TGTTGAGCGGGTACCAGAAGTACACC	AAGATCGAGGACGACGGCAACC	2	24.3254	194	2	25.0841	215	2	22.0071	209
676	RGNMS634	ATCAGCAAGGTACTCTCTCTTC	AACTGATCAGATATGCAGTGAT	2	24.4309	387	2	25.2692	387	2	22.107	366
677	AUT13570	CATGCTGATGCGATTAAGACTGC	CTAACCTGTGCCTTGTTTGATGG	2	24.432	236	2	25.2703	149	2	22.108	176
678	AUT13571	CATGCTGATGCGATTAAGACTGC	CTAACCTGTGCCTTGTTTGATGG	2	24.432	236	2	25.2703	149	2	22.108	176
679	RM13573	CTGCAGATCGATCGACGAGAGG	GCCATGAGGTTGGAGAAGAATCC	2	24.5011	335	2	25.3395	324	2	22.164	335
680	RM13574	TGCATGTTTGCCACAGTTAGGG	CGAGCCAAATTTGTGCACTCC	2	24.5023	221	2	25.3407	171	2	22.1653	181
681	RM13575	CAAGGCTTCTTGATCTCTTCATCC	GATATTGCGTACGTACCCTCTCC	2	24.507	399	2	25.3453	374	2	22.1699	396
682	RM13576	CGAAATCCGGTTGATACAGTGG	TAACGGGCATACTACTGCACACG	2	24.5737	170	2	25.4166	174	2	22.2402	172
683	RM13578	AGCTCGTCCACGGTGATGAACC	CCAGCTGTACGAGACCGTCATGC	2	24.6249	140	2	25.4827	131	2	22.2919	134
684	RM13579	GAGAAGAAATCTCACGGTTGTCTTGG	GAGGGCTTGATTTGATCTCTCTCC	2	24.6393	90	2	25.4971	90	2	22.3062	90
685	RM13580	GTTCTCCGTGAGGGACTGAGG	CGAACCCGCAATGTCTAATGC	2	24.6418	287	2	25.4997	285	2	22.3088	285
686	RM13581	TAATCAAACATCGGCACAGTGG	GCGTTGCGACACTAAACAATGC	2	24.7002	163	2	25.5395	171	2	22.3654	107
687	RM13582	GCTGTTTGGTGGTTCAGTACTCC	CGTGCCAATAATCCAGAAATGC	2	24.7007	119	2	25.5399	99	2	22.3658	119
688	AUT13583	AAGCTGGGTGATCTTAGTTTGG	GAGAGTAGTGGCTATTTGCTTGC	2	24.7008	183	2	25.5401	173	2	22.366	199
689	RM13584	TCCATCTTCACAATCAGCAACC	CCCTGTAACAATGTTGAGAACACC	2	24.7467	286	2	25.59	218	2	22.4119	224
690	RM13592	GTGTCTGCATTTCTGTATGTGTGG	CGCTTAGCATTTACACACTCTCTCG	2	24.8762	126	2	25.7261	104	2	22.5241	122
691	AUT13593	CGTAAAGCCATTCTGTTCCATCC	AATGCTAGCAACATCCAGCAACC	2	24.8792	289	2	25.729	289	2	22.5271	285
692	AUT13594	CATGCTAGTAAGCAAAGGGCAACG	TTGCACGTCCAACTGTCCAAGC	2	24.8803	228	2	25.7301	214	2	22.5282	204
693	RM13595	ACCCACAACTGAACGCAGAACG	GATCGAGCTATCGATATGCAAGTGG	2	24.881	362	2	25.7308	362	2	22.5289	362
694	RM13596	TATTGCCACTTCATGGCAAAGC	TTGCCGTTACATCTCCAACAAGC	2	24.907	98	2	25.7461	95	2	22.553	95
695	RM13597	GGCATTCACAGTCAAAGTGACG	CCCTGTCTCCTGAATCCTGATAGC	2	24.9766	499	2	25.8165	467	2	22.6204	442
696	RM13598	AGGAGGATCCCATGCACAGTAGC	CAATAAGGGATGCTTGGTGTTGG	2	25.1089	157	2	26.0081	163	2	22.7533	159
697	RM13600	GGTTAACCTTTCTCGCTCTTTGG	ATGATCCAAACCCACTGTCTTCC	2	25.11	122	2	26.0091	124	2	22.7543	116
698	RM13604	ACTGCAGGTGGTACCTTGATCC	GTGTTGTTCACTTGTTCAGCTTCC	2	25.4133	653	2	26.317	585	2	22.9775	611
699	AUT13605	ACGAACCGCCTGTCCATTTCC	CACCATGCATCGATCTTAATCTACCG	2	25.453	82	2	26.3574	82	2	23.0162	82
700	RM13606	CTTTACTTTGACTCGTCCTGTGG	CTCACTGAATGTGAGTGAATGC	2	25.5377	82	2	26.4234	100	2	23.0745	80
701	RM13607	TGCTCTCAAGGCCTAGAAATTACC	CTATGCGCAACTCCATTAAAGC	2	25.5675	181	2	26.451	632	2	23.1036	183
702	RM13608	CAGCACGCAACGCAAATCAGC	CAGTCACCTCAACACGCACACG	2	25.5812	95	2	26.4654	140	2	23.1174	95
703	RM13611	CTCTTGAACGGCTGCACGAAAGG	CGCGAGAATGGTAGGTGGATCG	2	25.6373	142	2	26.5162	142	2	23.1669	142
704	RM13612	GAGGACCAATAATTCCCTTGACTAGC	GCTGTCTCTGTGCTTCCTTCTGG	2	25.7053	133	2	1.58762	133	2	23.2139	133
705	RM13613	GACATACTTGGACTTGGGCTTCG	ACGATCGGACCCTGTATATGACG	2	25.7066	161	2	1.58634	161	2	23.2152	161
706	RM13616	GATCTAAACCCTCTTTCCACAAGC	CGGCCAATATATAATGCACTCC	2	25.72	452	2	1.57327	458	2	23.2279	440
707	RM13617	ACCATATAGCGTGTATGCAACC	TGCACACATGTACACAGTACACC	2	25.7242	107	2	1.56908	95	2	23.2321	97
708	RM13620	CGAGAGACAAGTCACGCAGAGC	GACACGCCACATTGGTTACTGG	2	25.7737	416	2	26.6424	430	2	23.2826	423
709	RM13623	AGCGTGTGTCAAGAGCAAGACC	GAGATGAAGAAGAATGCCCAAGC	2	25.832	146	2	26.6975	144	2	23.3403	148
710	RM263	CCCAGGCTAGCTCATGAACC	GCTACGTTTGAGCTACCACG	2	25.8713	156	2	27.7249	155	2	24.3702	153
711	RM13626	CCTTGAATGAAGAGGATGATGC	TTTGTAGGAGAACACGTGACAGC	2	25.9021	187	2	26.7603	186	2	23.4047	183
712	RM13628	TATGCCACGAATGACCCTAACC	CTCCATATGCAGCGACAATCG	2	26.005	282	2	26.8278	262	2	23.4944	265
713	RM13629	GAAGAACACCATAGCTGCAGAGG	TTCAAGAACAGAGCTAGGGACACC	2	26.006	165	2	26.8288	162	2	23.4955	165
714	RM13630	GCCGCTGATCTCTTACCTGTTACGG	GTGCTTCGGCACAGGTCAATGC	2	26.012	95	2	26.8349	102	2	23.5015	101
715	RM13631	GACGATTGCAGACACAAATCATGC	CAGATGCAAGCCCAAAGACACG	2	26.0536	274	2	26.874	264	2	23.5432	270
716	RM13633	CTCTTCCGACCGGAGATAATGC	GTTCACTCGCTGACGCTATCTGC	2	26.0726	209	2	26.8844	205	2	23.5544	209
717	RM13635	CAAACCAAAGGACAAGGGATCG	GCAGGAAGACGTCAAGAAGACG	2	26.0864	299	2	26.898	299	2	23.5685	299
718	RM13636	GATGCAGGCTTTGACTCTACAGG	GGCGAGTACAATACAGGCTCTCG	2	26.0877	99	2	26.8992	95	2	23.5698	99
719	RM13638	CGTCAACTGACTGGTCCCACTACTGC	CTTGGGCCCACCTGTCATACCC	2	26.1561	113	2	26.9633	140	2	23.629	107
720	AUT13639	GCGTGTGAAACTACTCCCTAGTTGG	GGAGAGAGATCCTCCTGCTTCTCC	2	26.1706	386	2	26.9779	383	2	23.6435	389
721	AUT13640	AGCACGCAGAGGTAACCATTAGC	TGTCCACTGAAATGTTCCTCACG	2	26.2056	620	2	27.0001	1074	2	23.6664	574
722	RM13642	ATATGGATACAGGCCAGCATTGG	CTGAGCCATCAAGTGCCTTTCC	2	26.2738	375	2	27.1051	379	2	23.7489	389
723	RGNMS530	CATCTGAAACATGAAAGATGAG	ATCATGATATTGAGCAACTTGA	2	26.3253	135	2	27.1668	171	2	23.7975	135
724	RM13646	TTTATATGCGGCCCTACTCTTCC	ACTAAGACAAGCAAGTCAGGATGC	2	26.3274	290	2	27.169	213	2	23.7996	230
725	RM13647	AAGGCATACGGAGCACGACTGC	ACTACGTGGACCGTTGGTGATACG	2	26.3338	91	2	27.1753	91	2	23.8059	91
726	AUT13648	GCCTGGTAAGTGGTAATGTAATGG	GTGAATTCCTCCTTGGTCTTGG	2	26.3541	299	2	27.1898	293	2	23.8262	289
727	RM13649	TGGAACTCCAAGATCTTCCTGAACG	CAAGCCGAGTAGGCCCAAGAGG	2	26.3919	185	2	27.2282	176	2	23.864	185
728	RM13650	CCCTCCATTCCCTTGATGTCC	CCCACGCCTATCCTCTTTACTCG	2	26.4772	398	2	27.3212	398	2	23.9445	398
729	RM13652	TTAAGTTTCGGCTCCTTCACTCG	CACACATATGCATCCACAGTTCC	2	26.4938	237	2	27.3378	233	2	23.9611	207
730	RM13657	AGGCAGATGTTGCAGTCGAAGC	GGTGAGAGTCCGAGGTGAAGTGG	2	26.5594	95	2	27.4116	92	2	24.0241	92
731	RM13658	GTTGGCAACAGCTTTCTTGTCC	GCTTACCGGAGCATCTCTTTGG	2	26.614	261	2	27.4463	276	2	24.058	284
732	RM13659	GAACAGATTCTTGCCAATGTGC	AGCGAGAAAGAACAGGAAGTGC	2	26.6263	367	2	27.4585	311	2	24.0703	309
733	RM13660	AGGCTTTGTGGCCGAGTTCTCC	GGAGAATGTCACTACTCGCGTTGG	2	26.6467	90	2	27.4789	91	2	24.0931	85
734	RM13661	CAGTGACACCCAAGGTCATGTTCG	CTGCATCTGGTCGATGCTGTCG	2	26.6491	295	2	27.4813	295	2	24.0955	295
735	AUT13662	CTCCTGCATCCGACTATTCTCC	CATCGTTTCCCTTCAGGATTAGC	2	26.7182	177	2	27.5615	175	2	24.162	171
736	RM13663	AGCAAAGAGGGAAAGGCAGAGG	CCCATCTCGCTAATACACACTAGCC	2	26.7294	227	2	27.5947	221	2	24.1733	233
737	RGNMS493	AGTAGCTCCGTGTAACACTCTC	TATGCAGGCAAAGTATAGTACG	2	26.7299	281	2	27.5952	281	2	24.1738	281
738	RM13665	TCAGGCTCTCCTAGAATCCCTAGC	CCGCTACATTTCACTCCACTCC	2	26.7504	93	2	27.6173	97	2	24.1943	93
739	RM13673	GCGAGCGAGATGGAGAGAGATGC	ATGAGGCGGCGAGGTTTCTTCC	2	26.8992	285	2	27.8352	275	2	24.3476	278
740	RM13674	CAGCAGCAGCATCTCCGAGTACC	ATCAGTGGCACCAACCTGACACG	2	26.9154	153	2	27.8477	156	2	24.3622	153
741	RM13676	CGCCATTGCCTATTTCTCTATCG	TGAGTTAGCGCCTTAGCAACAGC	2	26.9842	172	2	27.9298	168	2	24.431	170
742	RM13678	GCTAGATAATTGACCGGCCATGC	CAAAGTTGACTACCAAGCGTCAGC	2	26.9909	534	2	27.9362	571	2	24.4415	533
743	RM13679	AGATGACAAGGTGAGAGCACTGG	TGGAGCCCAGAATTTCTAGATCG	2	26.9952	277	2	27.9405	271	2	24.4458	269
744	RM13681	AGAGCGACTGCCAGTTCTTGG	GTAGTCGTGCTCGATCTGCTTGG	2	27.0303	373	2	27.9743	376	2	24.4799	373
745	RM13682	GTAACTAACGGCCACCCTCTTTCC	GAGCCGGAAGAATCGGAGAGC	2	27.0431	190	2	27.9872	193	2	24.4927	190
746	RM13687	GTGATGATAGCGATGAGAACTTCAGC	GCATTGCCATGATTCTTGATCG	2	27.1211	191	2	28.0554	188	2	24.5379	197
747	AUT13688	CCACTGATACAGAAGCTGATGAGG	AGCACAATGACTCCCTTCTTTGC	2	27.1293	187	2	28.0635	185	2	24.5461	623
748	RM13690	GGCATGTGATGTGGTGAGACG	CAATCCACTCCACTCCAACACC	2	27.1895	374	2	28.1246	374	2	24.6065	374
749	RM13691	GTGGTCATCCGAGAGATGATGC	TCATCGCTACTCTCAAGTCTTCACC	2	27.1919	97	2	28.1271	94	2	24.609	97
750	RM13692	GGGAGTAACGCACCGGAGATGG	ACCCACTTTACAGCGGCACAGC	2	27.2072	179	2	28.1422	176	2	24.6242	179
751	RM13693	ATTCGGAAGCACCACAAGATGC	CAATCAGGGTGGTGATTTGAAGC	2	27.2204	136	2	28.1555	128	2	24.637	138
752	RM13701	GCTAGCTCCAGATTCAGGATGACC	AATCCTAGGAAGACGCTGTGTGC	2	27.2717	213	2	28.203	213	2	24.6844	213
753	RM13702	AGGAGAGTGTGGGATGTGTGC	CACTACCTTTATGCTGTCCTAAGTCC	2	27.2846	152	2	28.2156	182	2	24.6973	152
754	AUT13706	CCGTGGGAAACAGTAAGAACACG	GCGCCCAACGATTAAATGAAGC	2	27.3357	263	2	28.2517	259	2	24.738	263
755	AUT13709	GTGGCTTGATTTCTGCAACTTCC	GCTGGTACCTACCAAGTATCATTTCG	2	27.3723	144	2	28.2883	162	2	24.7844	126
756	AUT13717	GACAGGTAAGGTGTGGTGGTAAGG	AAACCTTTCTCAAACGCACACG	2	27.5333	221	2	28.4223	164	2	24.929	215
757	RM13718	ACCATCACCAACCAACCAACC	CCGTTGCTTTCAGTCTTTCACC	2	27.5399	170	2	28.4288	170	2	24.9356	170
758	AUT13719	GCATCGGAATTTCATCAGAGAGC	AAGCAAGGCTCCTCAAAGAATCG	2	27.5576	361	2	28.4466	358	2	24.9533	363
759	RM13720	GCACATGCGGTCTCACTCTGTGG	CGGAGCGCGTAGATGGAAAGG	2	27.5765	191	2	28.464	191	2	24.9701	143
760	RM13721	ACATGCGGTCTCACTCTGTGG	GTAGGACCGGAACACCTTCTTGC	2	27.5765	565	2	28.464	565	2	24.9701	517
761	RGNMS648b	TTCCTTTATCACAATGCTACAC	GTCATGATGTAGAAGTGTCCAG	2	27.5973	404	2	28.485	389	2	24.9913	512
762	RGNMS905	TTCCTTTATCACAATGCTACAC	GTCATGATGTAGAAGTGTCCAG	2	27.5973	404	2	28.485	389	2	24.9913	512
763	RM13726	GCACATCCAGATCCTTAAACTTGG	ATTTAACCGTGGTCTTCCCTACG	2	27.6799	355	2	28.5539	367	2	25.0582	358
764	RM13728	AGCCTCGGTTGTCTAGGACTATCTCC	CACTGGTCGCTGAGTTGAGTGG	2	27.6975	295	2	28.5716	251	2	25.0771	543
765	AUT13730	ACGCATCCAGGGAGAGGATTGG	TGCTCCTGCTCTGCTTGCTATGG	2	27.7284	92	2	28.5983	72	2	25.1045	76
766	RM13731	TTTCGGTTGCTAAAGGGAAGAGG	GCTGCTGTCTGAGTTCTGTTTATGG	2	27.7506	268	2	28.6347	265	2	25.1261	265
767	RM13732	CCCATCACGTAGGCTCACTCC	ATCCTTCCCAAATCCCAACTGC	2	27.773	120	2	28.6571	125	2	25.1486	120
768	RM13735	GAAGAACCCAAACCATCCTCTGC	CCCTCGATCTACCAACGGAAGC	2	27.8657	367	2	28.7339	353	2	25.2238	367
769	RGNMS797	CAGATACTTCCCATGAAGAGAT	CCTGATGATACTTATAGCGGTC	2	27.8658	346	2	28.734	350	2	25.2239	346
770	AUT13739	CGCTGCTACTCCTAGCTGCTACC	CATGCATGTGTGTACGTAGGATCG	2	27.9522	169	2	28.8231	137	2	25.304	139
771	AUT13740	CAAACCAACGAATTGCTCTGTGC	AGAGCTCCTGGCTCTCCATCC	2	27.9697	106	2	28.8404	113	2	25.3219	76
772	RM13742	GATGCCTGCAGCTGGAAAGTAGC	TAACCTCCATCCAAACAGTCTCAGC	2	28.0126	188	2	28.8872	180	2	25.3684	188
773	AUT13743	CGTGTATTGCATGGATTGTCTGG	CGGAACCCACAATTTCTTTCTGC	2	28.0408	268	2	28.9262	539	2	25.3962	463
774	RM13745	CGCGAGTGCAAACAAATCAACC	GGGTGAGCGCTACTGCTAAACTGG	2	28.0901	124	2	28.9756	124	2	25.4453	132
775	RM13746	AAGGGCGAGGGCAGGTAAGATCC	TCACATGAAGACGAAGAAAGCAGACG	2	28.1123	236	2	29.0002	236	2	25.4671	236
776	RM13749	GCGGTCAGAATTATTCCAAGATCC	GTGTGCCATTCCCTAGATGTGG	2	28.2063	292	2	29.0879	467	2	25.5434	289
777	AUT13750	ATCTGATCTCACGAGTCACATGG	TGCTCGAGTTGTGAAAGATAGGG	2	28.2077	167	2	29.0895	154	2	25.5451	163
778	RM13759	GCCATTGGATTAAGATCTGACG	CTCAAGCTAGGGTTCAGATCAGG	2	28.3732	118	2	29.2904	136	2	25.709	112
779	RM13760	GAGAGGGAGGGATAGATTAACAAGG	CCTCGTCTCCACACTAGACTTGC	2	28.3815	176	2	29.2988	176	2	25.7174	176
780	RGNMS772	ATAAGTGCTTTCTTTAATCGGA	CCAACGAAGAAGAGTAAGAGAC	2	28.3816	200	2	29.2989	200	2	25.7174	200
781	RGNMS810	ATAAGTGCTTTCTTTAATCGGA	CCAACGAAGAAGAGTAAGAGAC	2	28.3816	200	2	29.2989	200	2	25.7174	200
782	RM13761	ATCCATCCTCAGACACACATGG	GAATTCCTGATATTCTCGCGTAGC	2	28.3891	199	2	29.3071	217	2	25.7246	1361
783	RM13763	TGAGAAGTCCCTATGCTGGTTATGG	CGTTATATGCTATGGTCGTGTGTGG	2	28.4099	168	2	29.3261	120	2	25.7448	148
784	RM13769	CCACCATTCGGTAATGAGATCG	GACGTGGTGATAGATGGTTCTGG	2	28.4991	399	2	29.4018	364	2	25.8243	382
785	RM13771	CCTCCCTCTCTCCGGTCTTTGC	GTCGAAGGTGACGTGCGAGACG	2	28.6309	449	2	29.5479	449	2	25.9514	449
786	RM13773	ACAAGTTCGAGGAGGAGGAGTGG	AGATGGAGGAGACGAGGAAGAGG	2	28.6506	226	2	29.5696	226	2	25.9694	223
787	RM13775	CTGAGCTTCTGGTGCTTCCTAGC	CATTATGAAGCATGAGGGCATCC	2	28.6642	342	2	29.5832	339	2	25.9829	342
788	RM13777	CGGCAGATGTGTATCTGGAGTGG	GCTGGTATTACTCTGTCTCGCATCG	2	28.6962	170	2	29.6161	170	2	26.0154	170
789	RM13780	GAGCTTAGCAGACAACACTTCC	TTTCCTCCTACACAACTTGTCC	2	28.7308	92	2	29.6451	93	2	26.0385	91
790	AUT13781	CACTCTCTGAACACACCCACACC	AGCTTAGCTGCTTCCGTTCTTGG	2	28.8185	193	2	29.7422	219	2	26.1288	181
791	AUT13783	TCATGTTGACGCACACATACACG	CTCTTCTTCCCTGGACCACACC	2	28.8336	143	2	29.7568	151	2	26.1449	141
792	AUT13784	ATCTCTACCGGCGACTAGGTACG	CAGTGATGGGCTGGTTAAAGTCC	2	28.8357	245	2	29.7589	233	2	26.1469	233
793	AUT13786	TCGAGAAGCTAATCGTCGAGACC	AACGGAGTAGAGCACGCATTGG	2	28.8528	256	2	29.7794	256	2	26.1637	256
794	RM13788	ATCCAAGTACTTCGCCAGCTTCC	GTCCTCCTTGGTGATGAGCTTCC	2	28.9736	369	2	29.9018	366	2	26.2545	369
795	RM13791	CACAAGGCTTTCAGGCGTTTGC	ACTCGTGTCCACTGGCCTTCG	2	29.0482	89	2	29.9774	86	2	26.3295	86
796	AUT13793	TGCTGCATCTCCATATCACAAGG	TCCCTCTCACTTCACACAGATGG	2	29.0637	169	2	29.9922	161	2	26.345	169
797	RM13794	CATGCACTGACGTAATGCAGACC	TCTGACATGAGCTGTGGAGAAGG	2	29.1019	185	2	30.1487	135	2	26.3668	135
798	AUT13796	GTTGGTATTCCCTGATGAGTTTGC	GAGACAGAATCCTTACGCTGTGC	2	29.1603	196	2	30.1037	172	2	26.4218	175
799	RM5631	GTTGGTATTCCCTGATGAGTTTGC	GAGACAGAATCCTTACGCTGTGC	2	29.1603	196	2	30.1037	172	2	26.4218	175
800	AUT13799	CCTAGGTTCCCATCGCAACTGACC	TTCCCGAGGAGGGAGACGAAGG	2	29.2498	145	2	30.2216	142	2	26.5123	145
801	AUT13803	ACTCCCTAGAACTCGACGATGAGG	GATACCGCCCAAGGAAGAAGC	2	29.3224	285	2	30.2881	282	2	26.576	285
802	AUT13805	AAAGGAACCGCTTGATGATTGC	AGTCTTTCCTTGCTGTGCTGACC	2	29.3509	94	2	30.3103	91	2	26.5994	94
803	RM13807	CGGAATTTGTCTTAGTGAGGATGC	GACTGCGGCAATTTGTATCAGG	2	29.4275	302	2	30.3868	100	2	26.67	260
804	RM13808	TCACATTCGCAGGAGTTCAGC	GTTGATGACTTAGCAATGCTCTCG	2	29.4573	368	2	30.4202	598	2	26.6984	346
805	RM13809	TCACATTCGCAGGAGTTCAGC	GTTGATGACTTAGCAATGCTCTCG	2	29.4573	368	2	30.4202	598	2	26.6984	346
806	AUT13818	CAGTAGTACGCCGGATCAACAGG	CCACTTGTTCCATCCACATCTCC	2	29.521	144	2	30.4962	138	2	26.7567	154
807	RGNMS745	CTATGTGTGAGAGAGAAGGGAT	GTACTTGCTCTTGATCTTGTTG	2	29.5395	387	2	30.5147	384	2	26.7752	375
808	RM13819	CACACTCCTGTCCTTTCCATTCC	AGGAGTTCTTGCTTGGAAGATGG	2	29.5397	120	2	30.5149	116	2	26.7754	108
809	RM13823	TTGGAAAGCCTTGATCCAACAGC	ACGATATGCACAGAGCCACTTCC	2	29.5487	198	2	30.5195	202	2	26.7842	198
810	RM13824	TGAGATGAAGACTGAAACGCTCAGG	TATTCCCGGTGCGTAGATTCATGC	2	29.5544	162	2	30.5253	162	2	26.7902	162
811	RM13825	ATCTCTGATCGATGAAGACTGC	CAATCATAGCGTAATGGAGTGC	2	29.5545	164	2	30.5254	164	2	26.7902	164
812	RM13830	TCATCTCTTCTCTCCCTCCTCTCC	GTTGGGTAAACCCAGCCAGTAGC	2	29.6135	162	2	30.5777	160	2	26.8454	160
813	RM13833	CCAGTTGGTGACAGAATTGAATGG	GGACGGAGGAAGTATGTCTGTATGG	2	29.6286	80	2	30.5951	80	2	26.8609	80
814	RM13834	CGTGAACACAAGAATATGCCAAGG	GACCCTTACCAACTTCCCATTCG	2	29.6301	376	2	30.5966	402	2	26.8624	362
815	RM13836	GGGATGGAGACGAAGGTGATCTGC	AAGGTGAACCACCGCAGCTTCC	2	29.7149	199	2	30.6809	199	2	26.9474	199
816	RM13837	CAGGAGGGAAAGATCACATTAGC	AAAGTTGGTCAAGGACTCAAGG	2	29.7169	258	2	30.6833	250	2	26.9493	258
817	RM13838	CCCAACTGCTAGGTTTCTGATCC	ACTGTGTTACTGTGTGCCGTTGC	2	29.7377	129	2	30.7014	139	2	26.9628	131
818	RM13840	CGGTCTTTAGTAATGGTGCTTTGC	GAGGCAGGTGTTTGTCGTCTAGC	2	29.7538	195	2	30.721	207	2	26.9789	189
819	AUT13841	GACCCGAGCTAGACGACAAACACC	ACGCAGCCTCGCACTGTACTCG	2	29.754	181	2	30.7212	187	2	26.9791	187
820	RM13844	CAGGAGAGAGTCCAAAGCCTTCC	CAACATCCGTCCTCCCAATACG	2	29.9194	165	2	30.9061	166	2	27.1449	165
821	AUT13845	GCTGCTTGTGTTGTTGTTGTCG	CACAGGCTCCTCTTCACCTATGG	2	29.9208	198	2	30.9075	198	2	27.1463	198
822	RM13854	CGTCAGTAATGGCGGATCTTGC	CTTCGCTATCACCGAAGGAACC	2	29.996	85	2	30.975	109	2	27.1996	82
823	RM13861	CCCATTACAACAGCTCCAATGC	ATGAGCCACCAAATTACCTCTGG	2	30.0807	98	2	31.0474	92	2	27.2746	86
824	RM13862	GACAGCGGCTACTCCTTCTTCC	CGTATTTCGACGAGTTGAGCTTCC	2	30.0862	186	2	31.0529	186	2	27.2801	181
825	RM13863	CTTCTGGCCAAAGTCCAACACC	CACTGCCCTTGCTGCTAAACC	2	30.0928	194	2	31.0595	174	2	27.2867	188
826	RM13864	CTCTTCGGAGATGATGCAGAGC	GAGCTGCGTATCAGCGTATGG	2	30.1208	185	2	31.0936	179	2	27.3134	185
827	RM13865	GTGAGTGGTGTGACTGGTGTTGC	CACCCAGCAGCCATAAACTTGG	2	30.129	152	2	31.1018	156	2	27.3216	152
828	RM13870	CACGGGAGCTTCCTTTGACTAGC	GGCTCCATCTCTCGTTTCTCTCC	2	30.204	145	2	31.1751	143	2	27.397	145
829	RM13871	CAAGCGCACGGAGAAGAATCG	AAGCAGAAACAGCAGCAGCAACG	2	30.2282	226	2	31.1972	220	2	27.4203	226
830	RM13873	GTAGTCGGAGTCGTCGGAGAGG	TATGTACAGGTGCGGAGAGTTGC	2	30.2677	215	2	31.2447	208	2	27.4597	215
831	RM13875	ACGTCAGTACGTGTGATATGATGC	CACATATGCGTAGGTGCAATCC	2	30.2935	165	2	31.2744	165	2	27.4852	165
832	RM13877	ACTAGTCAGGGCCAACAGACAGG	CAAGCATGCACCATCATCTCC	2	30.3018	265	2	31.2826	890	2	27.4935	500
833	RM13881	CTTGCCCAAAGATCAAGAATGC	GGCCCATAATTGTAGGAAACTGC	2	30.3905	422	2	31.3902	367	2	27.6106	398
834	RM13882	GCTTCTAGCAGCATAATGTGAGG	CTCGTGTTTATGTTCGAGATGG	2	30.3991	431	2	31.4088	432	2	27.6192	429
835	AUT13885	CCAGTCCATCAACTGGAGGTACG	GAATCAGGTGACTCCACGAAACC	2	30.5128	84	2	31.508	78	2	27.7278	78
836	AUT13887	GGCTACGCTCCAGTTAGTGAAGG	TGGTAGGAAGAAGGGAGAAGTTTAGG	2	30.5243	175	2	31.5196	183	2	27.7381	175
837	RM13893	CAGTCTCATTTGATGCAGTGTACG	CCTCTACCTATATGATGCACAACACG	2	30.5942	172	2	31.6149	152	2	27.7998	184
838	AUT13894	ACGTCTTCCTCCGCCTGATCC	GATTTCCTCGGTCTCGGTCTCG	2	30.5954	211	2	31.6161	214	2	27.801	216
839	RM13897	GCGACGACTTTGGAGGTAGACACC	AGACGTACAAGCCCGGCTACG	2	30.6994	92	2	31.7331	92	2	27.9053	92
840	AUT13898	GCTCATTCTGTTCTTGGGTTGACG	ATGCCCTTGGAACAGGAGATGG	2	30.7148	99	2	31.7506	99	2	27.9208	99
841	AUT13901	GCTGCGTTCTACTACTAGCCTACCC	GCGCTCAATTAGAGTTGAGTTTGG	2	30.7548	168	2	31.7894	164	2	27.9608	164
842	AUT13902	GGACGAGTCAAGTTTGGTCAACG	GGAGTGAGTAGCAGAGCGAGAGTAGC	2	30.764	195	2	31.7987	186	2	27.97	186
843	RGNMS857	GATGGATTTGTTTAGGTTTGAG	GGAGCTGTATGGCTCTATAAAC	2	30.7646	352	2	31.7994	352	2	27.9706	352
844	RM13903	TTCTAATACAGTCCTCCTCCATCC	GTGTCACATCCAATCAAAGTACCC	2	30.7837	173	2	31.8186	214	2	27.9905	185
845	RM13904	TTGCATTTAGGCAACTGGCAAGG	AGCGTCTTTGCGTTGGTTTGG	2	30.7931	190	2	31.828	184	2	28	190
846	RM13905	CAACGATACAGTAGCAGCACAAGC	CACGAGTAGCTTTCAGTTCAGTTGC	2	30.7977	366	2	31.8326	354	2	28.0041	358
847	RM13907	AACGTCTTCGCTGGTGTCTCG	GCTCGTCTCTCTTTGCTTCTTCC	2	30.8363	167	2	31.8745	165	2	28.04	165
848	RM13908	ATGCAGTTTCACCACGACAAACC	GGCACGGTTTGTATCAAATACCC	2	30.9104	271	2	31.9576	311	2	28.1141	269
849	RM13909	ATCCGATGTGTACTTGGTGATCG	GACCGGAAACCCTAATCCTAACC	2	30.9121	618	2	31.9593	363	2	28.1158	618
850	RM13910	GAGCGAGCTATACCACCGTGACC	ATCGCGTCCAAGAAAGGTGTCG	2	30.9451	188	2	31.9874	200	2	28.1454	182
851	RM13912	TTCCGTGGAAGATTCTCGATACC	GCTAGCCTACACAACGCAAATCC	2	30.9813	190	2	32.0228	182	2	28.1789	190
852	RM13913	ACCATTGCCGGAAGAGGTTCTCC	ATACCCTTGCTCTCGCTGCAACC	2	30.9911	190	2	32.0326	190	2	28.1887	178
853	AUT13914	GCGAAACTGGCCCATTATTTCTTTGG	CTCGAGCAGCCTCTGCTTCTTGG	2	30.997	304	2	32.0385	306	2	28.1945	306
854	RM13915	TAAACACCTCCTCTGTTCGATGC	GCTTGGTTTCATGGCTATTACTGC	2	31.0038	115	2	32.0451	115	2	28.2014	115
855	RM13920	CTCTCCAAACCGAGCCACTGC	CTCCTGCTTCAGCAGCTTCTTCC	2	31.046	169	2	32.1009	163	2	28.237	169
856	RM13923	GCGAGTAGAACGGAGGCAATCC	GAACACCATCGCCGTCATAAACC	2	31.0943	209	2	32.153	212	2	28.2812	212
857	RM13924	TAGGAGGGAGAAATCATTGTGG	TCGTAGTACAACCACAACATGG	2	31.2077	194	2	32.2529	174	2	28.3792	190
858	RM13926	ATCGCTACCCGAACATTGACG	GCGTAAGGTTGCACTTACTCACG	2	31.23	89	2	32.279	89	2	28.4017	89
859	RM13927	CTCCGTCCTCTTATCTAATACTCTCC	GCTACATACCAGAGTACTACCAGTGC	2	31.2711	458	2	32.3264	420	2	28.4484	440
860	RM13928	CACATAATCTGCCATCTTCACG	GATGCTTATGCCTTTCGTCTCC	2	31.3027	312	2	32.3624	230	2	28.4774	234
861	RM13929	CTTCTTCGCTCCTTTGCTGATGG	AGGAACCCACTCACCACCTCTGC	2	31.3149	89	2	32.3745	84	2	28.4895	87
862	RGNMS714a	TTAGTGATTTGCTCATTGTGAT	AACACATGAGATAGTGTATGCG	2	31.3175	150	2	32.3771	150	2	28.492	152
863	AUT13932	TTCTTTATTCCCTCGCACTGACC	CAATGATGCCACAAACCGTAACC	2	31.4249	188	2	32.5225	184	2	28.5978	158
864	AUT13934	CGCATTTGAAACTGGAAACTCG	GGACGAATACTGATATGGATGACTCC	2	31.4719	297	2	32.5841	323	2	28.6462	291
865	RM13935	ACTGTTGAACGAACAACACTGCTACC	GCGCTTGGTGAGTTCTTCTCG	2	31.4935	205	2	32.6002	205	2	28.6669	207
866	AUT13936	TTTCACTCAAGACCAGACCTGTACG	GCACGTCATTGTAGTGACTAGTGAGG	2	31.5299	151	2	32.6245	133	2	28.6923	157
867	RM8024	TTTCACTCAAGACCAGACCTGTACG	GCACGTCATTGTAGTGACTAGTGAGG	2	31.5299	151	2	32.6245	133	2	28.6923	157
868	RM13938	TTGTCTTCGCTCTGCTGCTTTCC	TTTACGTGCAACACGGTGGATCG	2	31.5913	151	2	32.6846	159	2	28.7508	155
869	RM13942	CGTCTCTGGGTCACACATTGG	ATTTCTGTTTCTCCCACGTCTGC	2	31.7049	191	2	32.8278	189	2	28.8639	215
870	RM13943	CTCACCTTTCCCTGTTCATGTCC	CTCTCCCTCACATCAGCCTTCG	2	31.705	145	2	32.8279	145	2	28.8641	139
871	RM13944	TTGCACACGAGATGACGAGAAGG	GAATTCGCGACACCACACAGC	2	31.7096	365	2	32.8325	365	2	28.8687	359
872	RM13945	GGCAACAGGACAGACATTTGG	CTTTCTGGATTCCTAAACGGTACG	2	31.7215	402	2	32.8445	399	2	28.8806	404
873	RM13946	GCCTGTCCGAATATGTTGTACTCC	GGTCGCAGGAGAGAGATACATGC	2	31.7232	399	2	32.8462	499	2	28.8823	264
874	RM13947	GTAGGCTTGTCACCTTCCCTTCC	GGTCCTGCAGAAAGAATCAAACC	2	31.7827	197	2	32.898	155	2	28.9353	161
875	RM13949	ATCCGTTCATAACAACGGCAAGC	AAACCAAATCTCCAGTCCCAAGG	2	31.8545	631	2	32.9697	605	2	29.0147	601
876	RM13950	AGGAGCAGCAGCAGGATGACG	GGAGAGACTTGACGGAGCTGTCG	2	31.8742	83	2	32.9889	83	2	29.0372	83
877	RM13951	GCCTTCTTCGACGACTTCTCC	CGATCATATCGTCCTCGTAAACC	2	31.8881	208	2	33.0024	208	2	29.0527	208
878	RM13952	CATGACAGATACCCAATACACTCTCC	CACCTCCATTCCTCCAACTATCC	2	31.9029	157	2	33.0172	154	2	29.0674	154
879	AUT13955	GAGCTTCCGGCCGTAGTTGTGC	AGACCTTCATCCGGCGGTTCG	2	32.0327	85	2	33.1773	76	2	29.2056	70
880	AUT13957	AGAGCCTCTCCCTCTCCTCTCC	CAGCAAAGAACGAGCTCTCACG	2	32.0777	398	2	33.2302	407	2	29.2504	499
881	RM13965	GCAGCCAATCCAGAAAGGAAGC	TTGTTCATCAGTACTGTGGCAGAGC	2	32.2831	283	2	33.4276	287	2	29.4522	279
882	RGNMS802	ATTTGGTGGAATCGTTAGTTAG	GAGGAAGAGGAAGTGTACTTTG	2	32.2833	399	2	33.4278	397	2	29.4524	399
883	RGNMS658	ATATCATATGAGGAAGCAGGAT	GAGAAGAGGAGAATGAATTTGA	2	32.2839	207	2	33.4285	207	2	29.453	207
884	RM13967	CGTGAAGTACGCACCAAGTCACC	ATAGGAGGAAGGGAGGGAGATCG	2	32.2865	276	2	33.4309	279	2	29.4556	276
885	RM13969	AGCGTATGTGGCCTTGAGAAAGC	ACACCCTCTCCCTTTCTGTCTCC	2	32.3119	199	2	33.4572	193	2	29.4811	197
886	RM13973	GGATCCCGTCGTATAACATTTCC	GAAGAGGAGGATTCGTTTGTTGC	2	32.4843	294	2	33.623	294	2	29.6555	294
887	RM13974	CTTCTCCAGAAGGCACCAAGG	GTGAGTGCTTGAAATGGGTTCC	2	32.488	99	2	33.6268	99	2	29.6593	91
888	RM13976	ATTGACGTACGTGCGTACTAACC	ACTCCCTCAGTTTCCATAAGTCG	2	32.6198	332	2	33.7661	318	2	29.8132	343
889	RM13978	GCAACAGCTCACCTCGATGACG	AACGCAAGCCTCACGTACCAACC	2	32.6481	387	2	33.8065	405	2	29.8416	387
890	RM13980	ATTCGATGGCTCCAAACTTGC	ATAGCTGCCGCTAATCATTGTCC	2	32.7921	173	2	33.9397	171	2	29.9504	204
891	RM13981	GTTCCTCATCAGAAGCGACAGC	CGGATGAGCCGATAATAATAGACG	2	32.8198	417	2	33.9672	414	2	29.9798	547
892	AUT13982	ATCCATTCTTGCTCCCAACAAGC	AGGAGGTGGAGGCTAGGGTTAGG	2	32.8728	243	2	34.0143	244	2	30.0365	236
893	RM13984	GCTGGTGAAGTGCTGGAAGAGG	CCCAACATGGCAACTAGTAATCACC	2	32.9469	392	2	34.1061	395	2	30.1225	389
894	RM13986	GTGATGGGATCATGCTAGTGTGG	AGTACTGCAGTTGCCCTGATCG	2	32.9917	137	2	34.1564	145	2	30.1727	145
895	RM13989	TACTCGGCCTCTACATCCAACC	GTTGATAGCAAGGCACCTGTGG	2	32.9943	396	2	34.159	396	2	30.1771	1085
896	RM13990	TACTCGGCCTCTACATCCAACC	GTTGATAGCAAGGCACCTGTGG	2	32.9943	396	2	34.159	396	2	30.1771	1085
897	RM13991	GTCACAACACCGAAGCAACAAGC	CTTCGGGATCCTCACCTTCTTCC	2	33.0009	295	2	34.1668	295	2	30.1879	298
898	RM13992	GGCTGCCTTCTTACAACTAGATTTCC	CTAGACCTTCACAGCGAATGTGG	2	33.02	199	2	34.186	195	2	30.2076	199
899	RM13995	TCCCTCCTCTCATTATCCATTTGC	CGTGGGTCCTTTATCTCCTCTGG	2	33.1447	199	2	34.2989	177	2	30.321	284
900	RM13997	ACTACCAGGAAACGACGCAAAGC	GCCCTACTCGTCTCCTTCCTTCC	2	33.2168	180	2	34.3876	180	2	30.412	333
901	RM13998	TGTATTAGCTCCGTTTCCGTTTCAGG	TGGTTTCTCCCAAACCATTTGC	2	33.2197	298	2	34.3905	290	2	30.4153	411
902	RM13999	GGATCTGGAGAAGTGCCTATCG	GAGATGGGAGTAGTCCATTTCTAGC	2	33.2481	151	2	34.4212	147	2	30.4473	147
903	AUT14000	TCAAGCATCTCAGTCAGCACAGG	CTACAAGCTGAAGCGGCTCAAGG	2	33.2677	236	2	34.4367	224	2	30.4645	230
904	AUT14003	CAAGCATTATCAGTTGGCTTCC	GTGCTAGACGACGTTCTCAAACC	2	33.3792	466	2	34.5956	537	2	30.5773	429
905	AUT14004	CAAGCATTATCAGTTGGCTTCC	GTGCTAGACGACGTTCTCAAACC	2	33.3792	466	2	34.5956	537	2	30.5773	429
906	RM8029	CAAGCATTATCAGTTGGCTTCC	GTGCTAGACGACGTTCTCAAACC	2	33.3792	466	2	34.5956	537	2	30.5773	429
907	RM8030	CAAGCATTATCAGTTGGCTTCC	GTGCTAGACGACGTTCTCAAACC	2	33.3792	466	2	34.5956	537	2	30.5773	429
908	RM14006	GCTGTTTGCAACAACAGTACACC	CGGGACTCTTGATAGTTGATACGG	2	33.4348	93	2	34.6472	85	2	30.6311	93
909	AUT14007	CAGCAAGCGCTGGGATAATGG	CTTCCTGCTCGGCCTCTTCTCC	2	33.4844	100	2	34.7081	100	2	30.6809	100
910	RM14008	AGAGAGGACATCCACCACTAGCC	AAATCTCTCCCAAGTCCCAATCC	2	33.5093	258	2	34.7331	302	2	30.7059	371
911	RM14010	GTACGGCCTCTTGGAGAGGAAGC	CAAGGACCAGGAGGAGAGAAAGC	2	33.5352	299	2	34.7585	299	2	30.7379	299
912	AUT14011	GGAGCAGTGGATGGATCTGAGG	GCACCACCAATCTACTCCTATTGTGC	2	33.5547	290	2	34.7878	288	2	30.761	291
913	RGNMS731	ATACCTGAGAGGATCAAGGAC	ATGATGATGATGAGATGAGATG	2	33.5903	327	2	34.8228	327	2	30.7998	327
914	RM14016	TAGATGCCATGTGTGTTGACTGC	GCGTTTGCTGAGCATTCTTTACC	2	33.6117	388	2	34.8389	426	2	30.8157	549
915	RM14017	GGAAGCCTGTTCTCATTTGTAAGC	TCCTCTATGTTGCATCCTGTTAGG	2	33.6133	367	2	34.8405	360	2	30.8175	481
916	AUT14020	ATCTGTGCATCTACATGGCTTCG	ATGCCAATTGGTTTGCTCTGC	2	33.6341	245	2	34.8713	239	2	30.8392	239
917	RM14021	CTCGTCCACATCGGGTAGTGC	CTTCAACTACCACCACCACATCG	2	33.6375	95	2	34.8747	104	2	30.8426	95
918	RM14022	GGCTTCTTTACAACATGAGAGACC	ATGCATGACTGCTGCACTACC	2	33.639	187	2	34.8762	187	2	30.8458	187
919	RM14023	AACTGGTTGGAGTACCCTTGTCG	TGCTGGCATTAAGGGATAAGACG	2	33.6574	484	2	34.8817	477	2	30.853	533
920	AUT14024	GTTCAAACCAAGCTGATCACAAGC	GGCGTCAGAGTCAGAGATGAAGG	2	33.6671	187	2	34.8915	169	2	30.8645	660
921	RM14026	CAGCAGTGAGAGGGAGACAGG	GGAGTGGTAGTAGTACAGCGAAGAGG	2	33.7326	257	2	34.9514	233	2	30.9455	253
922	RM14027	CAGCAGTGAGAGGGAGACAGG	GGAGTGGTAGTAGTACAGCGAAGAGG	2	33.7326	257	2	34.9514	233	2	30.9455	253
923	AUT14028	ATTTCCATGCAGAGGCAGAGC	CTCGTAAATGCACTGGTGATGC	2	33.7396	90	2	34.9584	94	2	30.9595	90
924	AUT14030	GAGATCGGGATCTAACACTGTAATGC	TCGGACGGAGGGAGTATGTAGC	2	33.7463	138	2	34.965	132	2	30.9698	134
925	RM14031	GAACTAGCAACGAATGGGATGG	CGACGCATTAAACCACAAATCC	2	33.757	103	2	34.9758	100	2	30.9808	197
926	RM5460	AAGAGAACAAGCCATGGTGC	GCCTTTTCTTGCCTTTGGAC	2	33.773	159	2	35.9866	150	2	31.9999	153
927	RM14037	ATACCCATGGAGCCCATACACC	ATTTAGGCAGGGCATGAAAGACG	2	33.8936	330	2	35.1067	248	2	31.1481	266
928	RM14040	CTAGGTAACGTCGCCTTTAATCATCC	AGACAAAGTGCCTCCTAATCTTCG	2	33.9126	361	2	35.1129	192	2	31.1603	583
929	RM14041	CTAGGTAACGTCGCCTTTAATCATCC	AGACAAAGTGCCTCCTAATCTTCG	2	33.9126	361	2	35.1129	192	2	31.1603	583
930	RM14042	GTGCCACATAGCAGTTTAGAAGC	CTTACACAAGGTCGATCACTGC	2	33.9157	137	2	35.1159	133	2	31.1639	141
931	RM14045	TTGTGAGAGCTGAAGGGTGAAGG	GGAGAACAGCGTTGCTCACAGG	2	33.96	120	2	35.1702	139	2	31.2082	120
932	AUT14046	GGCTGCGCCATTAATAACCTTGG	AGCTTGCTCACAGCCTCCACTCC	2	33.9658	82	2	35.1759	76	2	31.2161	70
933	RM14049	ATAAACCCTAGAGCAGCGGAAGC	CCGTTTGGGATAAAGCGTCTCC	2	34.0041	98	2	35.2346	98	2	31.2694	98
934	AUT14053	TTTCTTGCCCACACGACTACGG	TACGTGGCCAACTGGCTATACATACG	2	34.1571	166	2	35.3886	158	2	31.4211	163
935	AUT14057	ATCTCGCCCAACAACCTCACC	TAGAGAGCGAGCAGGAGCAAAGC	2	34.2593	373	2	35.4783	373	2	31.5206	373
936	RM14058	AAACACACCAGAGGCGTGATCC	AAAGCGAGCAACCAATAGCTTCG	2	34.2732	391	2	35.4921	392	2	31.5345	392
937	RGNMS815a	ACACGTACATGCATCACTTACT	CAACTAGCATTAGCACATCTCT	2	34.2887	159	2	35.5077	159	2	31.5509	159
938	RM14061	TACTGTACGTATTTGGCGCATCC	AACTGACCATGATGCACACACC	2	34.2961	128	2	35.5149	126	2	31.5581	128
939	RM14063	GTTCCCGTAGAGCACCTTGAGC	CCTCTGTCTCGAATCCTTCTTCC	2	34.3303	513	2	35.5494	513	2	31.5957	513
940	RM14064	TATTGTGATGCGGGTGTAGATGG	CGACGTCAAGTTCAGGATCACC	2	34.356	171	2	35.5783	170	2	31.63	171
941	RM14066	CCCTACATATACATGCCATTACCC	TCGTGACGTTTAGTCAGCAACC	2	34.389	187	2	35.6123	179	2	31.6646	177
942	RM14067	ATAAGCTCATCGATTGCGTTGG	GTATGGGTCCCAATGCATAAAGC	2	34.3959	271	2	35.6181	267	2	31.6714	271
943	AUT14069	GATCTGCAGGAAGATCGTGAGG	TCAGAGACACGGCATAGTCTAGGG	2	34.492	241	2	35.7058	238	2	31.7851	238
944	RM14070	CGCTCCCTCGACACAAATCTCC	GAGGAGGAAGAGCGGGAAGAGG	2	34.5106	138	2	35.7245	136	2	31.8088	136
945	RM14073	GAGCTCAGCTTCACTACTTCACTGG	ACACACAGCTGGGAGTTGTTGG	2	34.5677	193	2	35.769	189	2	31.8783	193
946	RM14076	GATTGTGGTGGCCGTACTGATACTCC	AGCTGCTCCTGCACTCTTCTGC	2	34.5697	168	2	35.771	126	2	31.8733	313
947	RM14078	CTGAGCTGAACTGCCCGCTTCC	TGAACCATGAACCGGGAGAAAGG	2	34.6353	119	2	35.8522	119	2	31.9451	119
948	RM14079	CACTGTGCGTGCTCAAGGTACG	GAACCATGAACCGGGAGAAAGG	2	34.6354	66	2	35.8522	66	2	31.9451	66
949	RM14080	ATCATCAGCAGCAGCAGTGTCC	GATTAAATGTGCCCGGAGACG	2	34.6381	163	2	35.855	160	2	31.9479	163
950	RM14081	ACGACGAGGAGGCGTTGTACC	CGGAGACACGGAGCAGATAAGG	2	34.6493	232	2	35.8661	226	2	31.959	226
951	RM14083	GCGCTCTTCTACTGGCTCACC	GATGTGTTGTGTTCTCGGTTTGG	2	34.6568	362	2	35.8736	359	2	31.9668	359
952	RM14084	CTCTCAAAGCTTCGCTCCAAACC	ACACTCGTGTGTCCATTAGAGGATCG	2	34.6574	170	2	35.8741	172	2	31.9673	176
953	AUT14085	ACAACCACAGCTGCTTGAATTGC	AGAGGAACCCACTGCCCTTGC	2	34.6598	195	2	35.8766	187	2	31.9698	189
954	RM14086	CACGGCACGAACAGACTTGTCC	GGATGAGATGACACGAGGATTTCG	2	34.6663	218	2	35.8832	214	2	31.9762	218
955	RM14087	GAACCTGAAATTGAACCCGAACC	AGTCGTATCCTTTCGGGTGACG	2	34.6692	398	2	35.8862	398	2	31.9792	398
956	RM14088	ATGACACGGACGGTGCTGACG	CTTGCTATCTGAGGCGGGAGTCG	2	34.6929	263	2	35.9155	260	2	32.0029	266
957	AUT14090	CCACACCACTACAAAGCTTTCTTCC	ACAGCATCTGGTCGAAGAAGTCG	2	34.7207	183	2	35.942	174	2	32.0301	183
958	RGNMS531	TTACATTCTCTCCCTCATCTTC	CATCATTATTGAGGCAAAGAG	2	34.7515	316	2	35.9728	308	2	32.0609	316
959	RM14095	CGGCTTGTTTATGCTACCAGAGG	CGAGGAGACTAACCAAATTGATCG	2	34.759	243	2	35.9834	227	2	32.0684	243
960	RM14096	GTGCATGAACGACATAGCAAAGG	TTCCGATCTGAATGCACACTGC	2	34.7621	170	2	35.9864	90	2	32.0714	90
961	RM14098	TAGTGGGTGGAAATTGTCATCG	GACGTAGAGGACGATGTTGAGG	2	34.8579	686	2	36.061	697	2	32.1684	630
962	RM14099	GGTAGCTGAGCAATTGGCATGG	GATGATCAGGAACTCATCCATCTCC	2	34.8635	185	2	36.0666	176	2	32.1739	183
963	RM14100	GATTCATTCCAGTGTGCAGAGC	CATGTACCCAACATGCAAATGG	2	34.9468	87	2	36.1593	87	2	32.2516	90
964	RM14102	GCATCATCACACAGCACAGACG	TCAACACCGACAAACCAATTCC	2	34.9557	322	2	36.1682	313	2	32.2609	328
965	RGNMS775b	CAAAGGGTCATCTTGATAGATT	AGCAACAATAGGACGAGTAAAT	2	34.9635	374	2	36.176	374	2	32.2687	456
966	RM14103	GAAGGAATTTGCACACTGTCAGC	GTTAAGATTGCCCTTGCAGTTAGC	2	34.9642	191	2	36.1768	190	2	32.2695	217
967	RM14104	TCAGCGTGTTAGCTAGGGTTTCG	GCGTGGTGAAGAAGGAGATCG	2	34.9648	175	2	36.1773	175	2	32.27	175
968	RM14108	TCAGCGTGTTAGCTAGGGTTTCG	GCGTGGTGAAGAAGGAGATCG	2	34.9648	175	2	36.1773	175	2	32.27	175
969	RM14114	TCAGCGTGTTAGCTAGGGTTTCG	GCGTGGTGAAGAAGGAGATCG	2	34.9648	175	2	36.1773	175	2	32.27	175
970	RM14119	TCAGCGTGTTAGCTAGGGTTTCG	GCGTGGTGAAGAAGGAGATCG	2	34.9648	175	2	36.1773	175	2	32.27	175
971	RM14121	TGGTCACAAGGAACACATCTCTAGC	TGGTCTAGTTCTGGGCCATTAGC	2	35.0586	374	2	36.2111	270	2	32.3167	318
972	RM14122	TGGTCACAAGGAACACATCTCTAGC	TGGTCTAGTTCTGGGCCATTAGC	2	35.0586	374	2	36.2111	270	2	32.3167	318
973	RM14123	TGGTCACAAGGAACACATCTCTAGC	TGGTCTAGTTCTGGGCCATTAGC	2	35.0586	374	2	36.2111	270	2	32.3167	318
974	RM14124	CTCAGTCAGCAACTCAGCATGG	ATCCTCTTCCTGCTCAATTTGG	2	35.0605	190	2	36.2129	156	2	32.3183	142
975	RM14125	GGTACACAGTGGTAGGAAAGGTAGC	GCAAGGTAGCAACCAAAGAATCC	2	35.0873	161	2	36.2394	168	2	32.337	158
976	RM14126	CCTGCTGCGAGACTATGTACAGG	GTGCAGGAGCACTGCAACTACC	2	35.0963	139	2	36.2485	139	2	32.3461	139
977	RM14127	AAACCCTCCTCGACCTGCTACC	GTCTTCTACCTCTCGCCCAAACC	2	35.1017	180	2	36.2538	181	2	32.3514	185
978	RM14128	TTTCTCTCCGCTTCTCCTTCTCC	GGAGAGGCTCTTCCTGAACTTGC	2	35.1101	255	2	36.2623	258	2	32.3603	255
979	RM14129	AGGAGGAGGACTCATCGCTTGC	GGAGCTCGCCTCCATAGATATAGACC	2	35.1295	244	2	36.3017	236	2	32.3797	241
980	RM14130	TATAGAACCGGAGGGAGTAACG	CGAAACTTCAGCTTATCACTCG	2	35.1386	255	2	36.3108	229	2	32.3888	233
981	RM14132	ACAGACGTACGATACAATACCG	TCAATGGGAGCAGTATATAGCC	2	35.174	192	2	36.3459	169	2	32.4245	198
982	RM14133	CGACAAATAATTGGAGCTGACAGTGG	CAGTTAGCAATGCCATGAGACAGG	2	35.1744	281	2	36.3463	261	2	32.425	277
983	RM14134	GATCAAGGTCTGACGAACTGACG	TGATTCTCACTGTGCCACTACTGC	2	35.1763	375	2	36.3481	375	2	32.4267	371
984	RGNMS887	CTAGAGAGCTACAGAAGCAAGG	CACGGATCTCCTATAAATTCTC	2	35.1832	176	2	36.3553	176	2	32.4337	176
985	RM14135	AAGAGAGGACTCGGAGGAGATGG	CTAGGGCTTCGTCTCATCACACC	2	35.1832	113	2	36.3554	113	2	32.4337	113
986	RM14136	TGCATTCTTTGTCCAGAGCTTCC	GCTAGTACCTCCTCCAAGACAACAGC	2	35.1855	231	2	36.3576	244	2	32.436	227
987	RGNMS708	TACATAGATAGACTGCTCGCAC	CCAAACTGAGAAATGAAGAAAT	2	35.1866	151	2	36.3588	99	2	32.4371	115
988	RM14138	CATGCAGCACATACACGTCAGG	GTCCTTCGGCACAAAGGTAATCC	2	35.2216	441	2	36.3833	387	2	32.4626	415
989	RM166	ggtcctgggtcaataattgggttacc	ttgctgcatgatcctaaaccgg	2	35.2395	418	2	36.4011	317	2	32.4803	418
990	RM14139	AGCACAAGAACACAAGAAGCAACC	CGTAGCACTCGAGGCTGTTCG	2	35.248	223	2	10.4075	223	2	32.4889	223
991	RM14140	CCTCCCTCTCCAAACACATTGC	TCATCAGCAGACAGAATGTTGACC	2	35.2784	491	2	36.4654	422	2	32.519	416
992	RM14141	GCCCATCTTCTCCTGCATCTCC	CCTGCTCGGTTGATTTCAGTTCC	2	35.3303	224	2	36.5128	218	2	32.5672	222
993	RGNMS750	AGTAGCTTTGCTTTCATGATTT	TTCATGATTATATTCCTCCTCC	2	35.3304	150	2	36.5129	144	2	32.5673	148
994	AUT14142	GCTATTTGACCTCAACTCCCAAGC	CTGCTCCCTCACTCACAACTCC	2	35.3312	161	2	36.5137	145	2	32.5681	151
995	RM207	CCATTCGTGAGAAGATCTGA	CACCTCATCCTCGTAACGCC	2	35.3754	121	2	36.5822	127	2	32.6323	132
996	RM14145	CATCCATTAATTTCCGCGATCC	GTCAAACGACAAACACGGAAACC	2	35.4953	177	2	36.7291	185	2	32.6863	181
997	AUT14148	ACAAGCAGATACTGACTGATGC	CTTCTTTGCATCCAGACTTCC	2	35.5451	186	2	36.7817	198	2	32.7359	184
998	RM14149	ATCGATCGTCCATCATCAAGTGG	ACGACGTCGCATTCACTGACG	2	35.5597	189	2	36.7963	194	2	32.7505	196
999	AUT14151	CTATGCTCTCCTCGCTCTCAGG	ATCATCCACTGTTCATCCACTCC	2	35.5763	144	2	36.8129	136	2	32.7674	132
1000	AUT14153	GGGAGTGACGGATTTCTTTGTTTACG	CCCATGTGGAACATCTGTGTATGG	2	35.5821	181	2	36.8187	167	2	32.7732	191
1001	RM14154	TCCTCCCACTAGCACCTCTGC	CTGCTACTATTCCAGCCCATGC	2	35.6255	588	2	36.8455	566	2	32.8116	538
1002	RM14155	GATCCCGACATGGACATCAGG	CAGTCTCCTCCTTGAAGCTCACC	2	35.6829	147	2	36.8967	147	2	32.854	147
1003	RM14158	GTGCTTGGAACATGCCTAACAGG	CCAGCTGACTCTGTTTGACTTTACG	2	35.7326	216	2	36.9335	266	2	32.8881	212
1004	RM14165	AAAGATGAGGCCCTAAGATTGC	TTTAAGTAGCCGGAGAAGAGTGG	2	35.7686	543	2	36.9791	477	2	32.9232	527
1005	RM14166	GCTATAGCCATTGCAGGTAGATCG	GACATGCATTCATGCTCTCACC	2	35.7873	167	2	36.9978	155	2	32.9419	158
1006	RM14167	CGTGCTTCACGTGTACTGATCG	CTGCCCTTGCTGCTTAATGTCC	2	35.8083	192	2	37.0428	195	2	32.9629	201
1007	RM14168	AAGCCCAGATGTTTCGGTTTCC	AAGAGGAGGTAACCGGCTTTGG	2	35.8134	274	2	37.048	265	2	32.9681	274
1008	RM14169	CAAGAGATGCCTCACTTCTTGC	ATGCTGTTAGATGATGCCATGC	2	35.8692	459	2	37.1237	439	2	33.024	452
1009	RM14170	TAAATGAACATGTGGCGGATGC	ATGTAGCGCCACCAATAATCAGC	2	35.8908	291	2	37.1453	270	2	33.0481	300
1010	AUT14171	GAACCTTGTGATATGGTTACGC	GGAGCTAAGGTATAGTAGCAACAGC	2	35.9182	200	2	37.0778	196	2	33.075	198
1011	RM14172	GGTCTTTCAGCGTTACTTGAGC	AGTGGCATATTGCTACTTCAGC	2	35.9235	299	2	37.1778	345	2	33.0803	301
1012	AUT14175	GCCTCACCTCATCATCACAACG	TGGTCCTTCCTACTGTTGGTTCG	2	35.9729	191	2	37.2505	184	2	33.1269	188
1013	RGNMS920	AAACTTGGTCCTTCCTACTGTT	TTTGCAAAGACAGTAAACTCTG	2	35.9731	107	2	37.2507	101	2	33.1271	104
1014	RM14176	AGCTCTCCATCAGATCATCAAAGG	ACTCCACCACTGAGGAGTTCTCG	2	35.9857	415	2	37.2633	394	2	33.1397	415
1015	AUT14181	AGTACCACCACCATTCTCTGCAAGC	TCGATTGGCCATGAGTTCTCG	2	36.0285	285	2	37.2968	295	2	33.1807	281
1016	AUT14182	GTGATGCATCTTGAGAAGAGATGG	CACCCTTTCAGTGCCTCTAAACC	2	36.0312	195	2	37.3295	201	2	33.1834	199
1017	RM14183	TTGCCTCCAAGACTAGTACACATGC	CTCTCCCATTGCTTTCCATTAGG	2	36.0366	95	2	37.3348	167	2	33.1888	99
1018	RM14184	GGGCCAGATTAGGCAGAAATTAAGC	CTCCAACTCATGGGATGCAAGG	2	36.0614	154	2	37.3672	158	2	33.2135	150
1019	RM14185	ACGGCAATGTAGAGGAGCTTGG	GCTTCTTGCCTTGCTTTGATCC	2	36.0616	129	2	37.3674	129	2	33.2137	129
1020	RM14186	ATGGCGTACACATGGCCTCACC	GCGAAGACCCAAGAGGAAGAAGG	2	36.0619	164	2	37.3677	159	2	33.214	159
1021	RGNMS816	AAACCAAGACAAGAGAGAGAGA	AATCAAGAATCAAGAAGAGGC	2	36.062	342	2	37.3678	340	2	33.2141	340
1022	RGNMS848	CACACACACAACTCCACTAGAT	GTCCTCTTCTACCCTTCTTCTT	2	36.0621	201	2	37.3679	196	2	33.2142	195
1023	RGNMS570	ACCAGTCTAAGCTTGTGATCTT	GGTATAAGAAAGGAAGAGAGGG	2	36.1286	374	2	37.4373	360	2	33.2798	360
1024	AUT14188	GTGTGCTCCTTGGGAAGAAAGG	GGGAGAAAGGTGGACATGTAAGC	2	36.1288	142	2	37.4375	124	2	33.28	124
1025	RM14189	CGAGGTGGAGTACCACCATTGC	CACCTGAAGATGCTGTCCATGC	2	36.1393	86	2	37.4477	89	2	33.2903	77
1026	RM14190	TGCAGAAGGTGCAGTTGTACGG	GACGAGGTGATCGGTGGAAGG	2	36.1486	135	2	37.4571	135	2	33.2997	135
1027	RM14192	GCAGTGGAGAGGAGAGAGAAAGAGG	GAGGAAAGCAGGCGAGAATGG	2	36.162	174	2	37.4702	164	2	33.3128	172
1028	AUT14193	CTAAACAGAACAGAGGGTGTTCC	GATTTGTGAGGTGAGAGAAAGG	2	36.1718	339	2	37.48	331	2	33.3226	331
1029	RM14194	AACAGTAGCGCTTCCTGTCATCC	TCCTGCTCCACTACTACGTCTGC	2	36.2364	187	2	37.5563	183	2	33.388	187
1030	RM14195	CCATTGGTGCAGACGTAGTAGTGG	AGCCTCACATCCTCCTCCTTCC	2	36.2365	197	2	37.5564	198	2	33.3881	197
1031	AUT14196	ATCCTAGTGGATAAGGCACAGACTGG	CCCTTGCTCTTCCACCTCATCC	2	36.2621	335	2	37.582	341	2	33.4136	307
1032	RM14197	GGGACATCTCCATAACACATACG	CTCTTCAGAGAGAAGAAGCAAACC	2	36.2725	131	2	37.5917	139	2	33.424	131
1033	RM14198	AGCTGCAGAATTGGCTTCTTGC	GGACACCAAGAAAGAGGGAAGC	2	36.2765	164	2	37.5957	164	2	33.428	164
1034	AUT14199	CTAGCTACCAAGCTGCCTTTGC	CAAAGTCACCAACACATCACAGG	2	36.2776	86	2	37.5969	74	2	33.4292	89
1035	AUT14200	AATGACGTCTAAGGTGCTTTCAGC	CTGGGCTTAGTTCTTGACAGTGG	2	36.2845	279	2	37.6037	285	2	33.436	281
1036	AUT14201	CCCGAACTGACCGTATATTAGCC	GCTTGACCGCCTCTATTATATTGC	2	36.2927	198	2	37.6121	224	2	33.4442	283
1037	RM14203	AGCCTATATCCAATCCAACACG	GAGACACGAGAGAGATTGTAATGC	2	36.3012	96	2	37.6222	96	2	33.4547	96
1038	RM14204	CTAATCACTGCACTTCTGTTGC	CTAGAGAAGGACTGGAGATTATGC	2	36.315	99	2	37.6361	99	2	33.4688	99
1039	AUT14205	GCCTCGAGAAAGAAGCATGTCC	AAGCGACCTGTACCTCAACTTCG	2	36.3184	284	2	37.6395	278	2	33.4722	270
1040	RM14210	CAGGAACATGACATTGACACTGG	CAAGTAGCAGGAGCAGAATGAAAGG	2	36.3998	180	2	37.6685	178	2	33.5563	178
1041	AUT14211	GCTTGGCTTGAGTTCATTTCAGC	TGAGAAGAGGCGTCCATGTAAGG	2	36.4308	388	2	37.699	1455	2	33.5868	319
1042	AUT14212	ATTAACATCTCTCCTGCCCTTGC	CGACCTCGTCTTTCTTCTTGTCG	2	36.4467	183	2	37.7161	177	2	33.6027	164
1043	RM14213	GATTCCGTGTGTTTCTCCTTGC	TGGTAGCTCAGCTCCTCTGTACG	2	36.4957	135	2	37.7611	131	2	33.6514	135
1044	RM14214	CAATCCAGAGATGAACACAAGAGC	GCTTGCTGCTCTAGCTCTTTAGGC	2	36.4959	86	2	37.7613	80	2	33.6516	86
1045	RGNMS880	ATTTGCAGCTGTACATGTGAT	AAATTCATTTGTGATTTCCTTC	2	36.4961	149	2	37.7615	149	2	33.6517	149
1046	RGNMS597	CTGACTGACTAGAAATCACACG	GGGTTGACATAGGAGCTTTAG	2	36.4963	217	2	37.7616	205	2	33.6519	213
1047	RGNMS918	CTGACTGACTAGAAATCACACG	TGATTAGGTTAGGTCTCTGCTT	2	36.4963	192	2	37.7616	180	2	33.6519	188
1048	AUT14215	TGATGGTGGTGGTGGAGTCACG	GCCGCTGATTAGGTTAGGTCTCTGC	2	36.4964	93	2	37.7617	81	2	33.652	89
1049	RM14216	ATGCGAAGAAGAGGAGAAAGAGG	CATGCATGTTCCAAGAGAACC	2	36.5237	677	2	37.7888	617	2	33.6792	630
1050	RM14217	CGTCGCCACTATCATATTCTTACC	CACAGAAAGGAGAGGGAGTAGG	2	36.525	399	2	37.79	383	2	33.6805	399
1051	RM14219	TTTCACTCTCCTCTCGCGTCTCG	CGATCTAACTCCAAATCCCATCAACC	2	36.5293	78	2	37.7944	78	2	33.6849	78
1052	RM14220	TCTCCACACAAACTTGGAACACG	GTCTGTATTGTGGGTGCAAGAGG	2	36.5666	171	2	37.8185	156	2	33.7153	167
1053	AUT14221	GTACTCGTTGTTGGAGAGTTTGTGC	CTCAGCACTTGTGTTCGAGATAATGG	2	36.5865	271	2	37.8394	190	2	33.7352	250
1054	AUT14222	AATGGACATGGGCACATACATACC	CCGCTTCCCTTTGTTAGTTAAGC	2	36.5975	134	2	37.8503	126	2	33.7462	128
1055	RM14224	CTTCTTGCTCACTTGTTCATGC	CTTACTTGGGTAGGAGGCAACC	2	36.6536	199	2	37.9502	195	2	33.7945	199
1056	AUT14227	CGGAGTGAATGAGTTTGCTCTGC	GTCATAACCCTACCTCCCGTAATCC	2	36.671	285	2	37.9726	539	2	33.812	285
1057	RM14228	CCCTTCTCGTGAGTGCTATGC	GAACAGGAAACCTAATCTAGCACACG	2	36.6854	135	2	37.9866	126	2	33.8264	135
1058	AUT14230	AAGCAAGAGGGAGGGAGACATGG	CGTTGAAGAGGGACACAGACACC	2	36.7319	168	2	38.0427	162	2	33.8729	168
1059	AUT14232	CGCCATGCCTAACCTATTATTGTGC	ATCGTCATCCATCCAGCAAGC	2	36.7415	189	2	38.0522	182	2	33.8825	189

## Sheet: Chr 3
SL. No.	Marker Information			Oryza sativa ssp. japonica			Oryza sativa ssp. indica			Oryza rufipogon
	Marker Name	Forward Primer Sequences	Reverse Primer Sequences	Osaj_CHR	Osaj_Position (Mb)	Osaj_Exp. Amp. (bp)	Osai_CHR	Osai_Position (Mb)	Osai_Exp. Amp. (bp)	Oruf_CHR	Oruf_Position (Mb)	Oruf_Exp. Amp. (bp)
1	RM14233	CAGCAAATAACCCTTCGTCATGG	CAGCACTGCTCTGGATTCTTTGG	3	0.00056	173	3	0.278698	173	3	0.021067	173
2	RM14234	CAGCAAATAACCCTTCGTCATGG	CAGCACTGCTCTGGATTCTTTGG	3	0.00056	173	3	0.278698	173	3	0.021067	173
3	RGNMS1339	CTTCATTTATTTCCTCACCATT	CATAAAGTTGTCCAGGTTCATA	3	0.0583315	342	3	0.322439	326	3	0.0532595	698
4	AUT14236	CTTGGAGAAGAAGAGGCTGGAAGG	GGATGATATCCACCGGGATGC	3	0.0632855	294	3	0.327377	294	3	0.0586195	286
5	RGNMS1014	TCTATATCACTCTATCTCCTTCCC	ACTCCAGAGTAGAAGAGCAAAG	3	0.0794465	215	3	0.343386	215	3	0.0748865	215
6	RGNMS1406c	CATGAATGGTAATTCTGTGTGT	ATTACTCCAGTAAAGCATCAGC	3	0.0819725	373	3	0.345913	369	3	0.0773745	369
7	AUT14238	CCGTCTCTCTGTTGTTGTTCTGC	TGGTTCGCCAACAATTAAGACG	3	0.082257	116	3	0.346198	112	3	0.077659	112
8	RM14240	GCTCAAAGAATGACACCGATGC	CATGGTGAGTTTGGAGTGATTGG	3	0.0996765	183	3	0.363613	183	3	0.0950705	183
9	RM14241	GGGTTCCAAACACATCAATTCC	GCATTGAGGCCAATGTATGTAGG	3	0.104202	94	3	0.368136	94	3	0.0995955	94
10	RGNMS1046	CATGTTCCTCTTTGTAGTGTTG	GAAGAGACGAGTATTTCCTCAG	3	0.104308	255	3	0.368244	255	3	0.0997025	255
11	RGNMS1239b	TTTAGTGAAATGTTTGAAGCAG	ACATCAATTCCATCAGCATTA	3	0.104344	152	3	0.368279	152	3	0.0997375	152
12	RM14242	TTTCACTTCGTGGAACCTTTCG	AACCGGAGTGCTCAACTACAAGG	3	0.104672	482	3	0.368607	448	3	0.100066	450
13	RGNMS1225	GACAAATTCTAACCGTACCAAT	ACCCTTAACATGCTAAATCATC	3	0.105258	390	3	0.369159	356	3	0.100621	359
14	RM14243	CAATTTCAAACCAGGACTGACAGG	ACACAGAAGCAGATCGGAGAACG	3	0.114062	297	3	0.37796	301	3	0.109393	279
15	RGNMS1353b	GATGCCCTCATACTCTTAACAT	TGGGATCAAGTATAACACACAG	3	0.114098	277	3	0.377995	281	3	0.109427	259
16	RGNMS1354b	GATGCCCTCATACTCTTAACAT	TGGGATCAAGTATAACACACAG	3	0.114098	277	3	0.377995	281	3	0.109427	259
17	RM14244	TGAGCTAGCGTTGAGTTCTTAGCC	TGGCTTAACCTGCACTTTCTTCC	3	0.11743	394	3	0.381331	378	3	0.112741	374
18	RGNMS1340	ATTAGATTAGAGGGAGGGAGAG	ATAGCATGGATTACAAGGGTAG	3	0.131022	342	3	0.394912	342	3	0.126381	342
19	RGNMS1398	CTACCCTTGTAATCCATGCTAT	GGCAAATACTTCATCCAATAAT	3	0.131344	191	3	0.395234	191	3	0.126701	191
20	RGNMS1319a	ATAAGATGCGATAATGATAGGC	ATTCTCCAGTTAGTTGGTTTGT	3	0.150318	203	3	0.41421	203	3	0.145658	203
21	RGNMS1084	CTTCCCTCTCTCAATCTCAAT	GAGAGAGTGAGGAATGAATTA	3	0.153207	115	3	0.417098	115	3	0.148547	115
22	RGNMS1173	CTTCCCTCTCTCAATCTCAAT	GAGAGAGTGAGGAATGAATTA	3	0.153207	115	3	0.417098	115	3	0.148547	115
23	RM14247	TCGATCGACATTACACACAGTGC	ACCGTTCCTTCGTCCAGTACTCC	3	0.157401	295	3	0.421292	293	3	0.152745	235
24	RGNMS1181	CGATCGATCTATCTTCTTGTCT	ATCACATCCATCCATTTAATTT	3	0.168378	194	3	0.433351	194	3	0.163819	194
25	RM14248	TTCTTCATCACGCACCACCAACG	ACCATGGAGTCCTGCGGTTCG	3	0.170845	360	3	0.435817	396	3	0.166188	564
26	RM14259	CCCATACACAAGAAATGAGAGC	CTAAGCCCTCCTTCTGAAATCC	3	0.244689	245	3	0.547918	245	3	0.238536	245
27	RGNMS1045b	AAATGATATAAGGCAAATGGTC	AATCCTTCTTTGTTATTATTTACT	3	0.247177	274	3	0.550408	271	3	0.241025	274
28	AUT14263	TTAGAGGAGATGATGGTGCAACG	AGCAGCCATTGAATGTGTTTGG	3	0.347766	198	3	0.604604	182	3	8.62892	194
29	AUT14264	GTGTAGCAGCAGCTGGACAACC	GTGCGAGATCGAGGCAAATACG	3	0.359455	139	3	0.616246	139	3	8.64061	145
30	RM14270	ATTATCGCTCGGAGATGCTTACC	GCCAATATTGTCCACACAATCACC	3	0.413766	387	3	0.662499	370	3	8.68256	303
31	RGNMS1116	ATTACCCAACCTAGAACAACAC	GTGTAAACATATGGCATCAAGA	3	0.424538	217	3	0.672871	219	3	8.69325	217
32	RGNMS1283	CAGTACTTCCGAAGCTTTAGTT	ACAAGTCTCTTCTCTAGCTTGG	3	0.435173	280	3	0.683535	280	3	8.70388	280
33	RGNMS1293	GGATATATCATAAGTTGCCGAT	GGAAGCAAGTAAGAAGAACACT	3	0.435376	321	3	0.683737	321	3	8.70409	321
34	RM14272	AAGAAGAGGAAGCTGTGGGTCAGG	ATGTGATGGGAAATGGAGAAGACG	3	0.448516	123	3	0.703484	107	3	8.71588	123
35	RM14274	GCTTTCCATCGGTGTTAGTTGC	TTCCAGTTAAGTACTGGCTTCACG	3	0.473293	204	3	0.737476	200	3	8.74066	204
36	RM14275	GAAACAGTTGAGAGCGGTTACTGG	GAACCACTAGATGAATGAAGGCTAGG	3	0.473782	195	3	0.737962	163	3	8.74115	147
37	RM14277	CTCCGGGTTTCAGGTTCCATCC	CACTCATCCGAACCAACCTTCG	3	0.502524	281	3	0.762513	271	3	0.288021	277
38	RM14280	CTCGATCCCTCGCTTTCTGTCC	CCAGCCAGATCAGCTCAAACAGG	3	0.512732	248	3	0.772941	203	3	0.298237	248
39	AUT14281	CATGCATGCAACTCTGCTAAACG	ATCAGGATCCAGGAAATCGAACC	3	0.514867	186	3	0.775043	230	3	0.303768	296
40	RM14282	CCCAAACACAAACACAAAGAGAGC	AACACGCAGGTCCTCTTGAACC	3	0.515964	145	3	0.776184	121	3	0.304974	145
41	RM14283	GCCATTGGCACAGTAGAGTAGAGG	TTGAGGAGAGGAGAAGGGAGAGC	3	0.528138	196	3	0.788021	180	3	0.317202	178
42	RM14284	GCCATTGGCACAGTAGAGTAGAGG	TTGAGGAGAGGAGAAGGGAGAGC	3	0.528138	196	3	0.788021	180	3	0.317202	178
43	RGNMS1381	TCTTCAAGTTTCATAACATTGG	TTGTACCAACCCATATAAATCA	3	0.53193	159	3	0.792701	158	3	0.320978	159
44	RM14285	CGTTCACACACTTCACTCACACG	CGCCATTGTTGTTGGAAGAAGC	3	0.588265	91	3	0.846209	93	3	0.364001	89
45	RM14286	CAACAATGGCGTCGTTCTCTCC	CGATTCGATTCTAGAGGGTTTAGGG	3	0.588345	166	3	0.846291	160	3	0.36408	162
46	RGNMS1002	AGAATCGTATTGCTTACCAAGT	GTCTTCTAGTGCATCTCCTCTC	3	0.588553	353	3	0.846494	353	3	0.364283	353
47	RGNMS1032	CATCTCTGTGCACTGTATCTTC	CTGTATCAGCTCAGAGATTTCA	3	0.590164	249	3	0.848118	249	3	0.36621	249
48	RM14287	CGGAAGGACGTCAAGTACAACG	TACCACCAACATGCAACTGATCC	3	0.592475	261	3	0.850437	259	3	0.36852	261
49	RGNMS1136	AAGAGAAATGTCCATCCTTAAA	CCAAGTCAGACTGTCCATCTAT	3	0.615555	190	3	0.87278	190	3	0.391176	190
50	RM14288	GTACCGCAGCTTGATCCCTAGC	CCCAAATAGCGTGACAAAGTGC	3	0.629308	186	3	0.886559	190	3	0.404942	186
51	RM14291	CTGAGGAATCGAATTGAGACTCG	ATCAGCAACCAGTCCATTCAGC	3	0.70888	170	3	0.95815	180	3	0.47842	168
52	RM14292	TCGTACTGCACCTGCATCTTGC	ATGAACCACAACTACGGCAACG	3	0.731244	139	3	0.981179	142	3	0.499588	139
53	RM14293	TCCAGAAGCCTCTGCTGCATCG	GATGACGATGGACGACGTGAGC	3	0.732576	194	3	0.982514	199	3	0.500919	194
54	RM14294	ACACATCAAACACAGCACTGTAGC	ACCCTCCTACCGCTTAATTCTCC	3	0.735233	151	3	0.9851	153	3	0.503575	145
55	RM14295	CACACAGGTCACTCCCATTCTAGC	CCTAGTATAAAGCGAAAGCGTGTGC	3	0.735568	399	3	0.985436	403	3	0.503903	398
56	RM14296	TCAGAAGATCCTCAAAGGCTACTGG	AACAGATCACTGTTGCCTTCACC	3	0.737093	114	3	0.986964	174	3	0.505427	126
57	RM14297	GCACAGTGTACATTGCTGATCG	GTACAACATGCCTGCCTTTACG	3	0.738931	284	3	0.988865	280	3	0.507277	284
58	AUT14298	ATGATGCCTCATGTCTCTGATCTCC	AGATGAACACGACCGATAGGATAGG	3	0.76121	167	3	1.01206	155	3	0.529545	176
59	AUT14299	ACACATACGAATGGAGTGCAAGG	AAAGCTGGGAGGAAGAACCTACG	3	0.776132	199	3	1.02763	209	3	0.544343	211
60	AUT14300	TTCCAAGGAACACAACAGTTCTCC	CTCATGGGCCTAGTACCCAACC	3	0.776347	199	3	1.02785	196	3	0.54457	190
61	AUT14301	TCATCATCATCAGTCCAGCATCG	GCGGCGATTGAATTGTTTCTTAGG	3	0.789312	177	3	1.04081	179	3	0.557517	197
62	RM14302	CAACCGATCCCAGAGATCAAGG	GCAAGAGAGGGAAGAGGAAGAGG	3	0.849086	77	3	1.09599	86	3	0.600295	80
63	RM14303	GTCTGTGCGCTCCTTGTTCTAGC	CCTGGACCAATTTGTATGGTTGG	3	0.937395	194	3	1.18523	185	3	0.689783	188
64	RM14305	GCGATTGATGAATTTCCGTCTCG	AGCCTGCCTGTTGCAGATACCC	3	0.960025	208	3	1.20147	208	3	0.7054	211
65	RM132	atcttgttgtttcggcggcggc	catggcgagaatgcccacgtcc	3	0.993734	82	3	1.21096	79	3	0.739664	82
66	RM14307	TTAGCGGAGTTGGAATAACACG	GCACTGCATACCTCATAATCTCG	3	1.01944	226	3	1.25815	233	3	0.765436	212
67	RM14308	GCATTCTAGTGTTATGGCTGTTGC	GCTACTAAGCTGGTCACCTGTGG	3	1.06657	267	3	1.31199	255	3	0.81248	255
68	AUT14309	CGCACTTGCTTAGAAGTCAATCATCC	ATGCTCTCTCCTTCAGGCCATCC	3	1.0963	188	3	1.34117	170	3	0.841476	182
69	RM14311	AGCTTGACTTCACACCCACTCG	GGACGACCTACCGATCAAGACG	3	1.14049	218	3	1.39093	260	3	0.890746	176
70	AUT14317	TGAATTCTTGCACATGGTCAGC	TGGGAGGTTTGCTAGGGTAATCC	3	1.29885	251	3	1.5355	235	3	1.04512	245
71	RM14319	TACGCGTATCGTGTTGTGTATGC	GAGTCGAGCTCCTGCTTGTCG	3	1.31858	371	3	1.55648	371	3	1.06512	371
72	RM14320	CACCTGTAAATTAGGACACTGG	CAGTGTACTTTGAACTGCCTAGC	3	1.32099	440	3	1.55889	413	3	1.06811	302
73	RM14321	CACCTGTAAATTAGGACACTGG	CAGTGTACTTTGAACTGCCTAGC	3	1.32099	440	3	1.55889	413	3	1.06811	302
74	AUT14323	CAATTTGCTATGGACGGTTGTTCG	AATGTGGTCCGGGAGAACAATGC	3	1.37555	137	3	1.59151	103	3	1.10798	109
75	AUT14324	CAAAGAATCCAAGGAGGCCAAAGC	ATGCCGATGAGCACCCAGAGG	3	1.43586	248	3	1.65775	230	3	1.17421	236
76	RM14325	GCGCTACTACTTCTCACTCTTTGC	GAGAGCTCGTACTCGGACTCG	3	1.46271	237	3	1.68319	237	3	1.19961	237
77	RM14326	CACCCACCTCTTCGTAGGTCTCG	GCAATGTCTCGTCGCTTCTCC	3	1.46846	260	3	1.68925	261	3	1.20568	261
78	RM14327	GATGCAGTAGGAACACCAAACAGC	ATCGAGTACCAAGTGCCTGTGC	3	1.48541	228	3	1.70582	214	3	1.22268	215
79	AUT14330	GTTGACAAACAGGCCCTGAAACC	GTATGGTCTGGAGACGACGATCC	3	1.49895	170	3	1.74752	178	3	1.26542	174
80	RM14331	GAAGGAGAAGCTTACGAGGTTGC	GCTTCCAACCTCAGGTCTCACC	3	1.59459	98	3	1.83901	98	3	1.36143	98
81	RM14332	CGTGAGCGAAGAGACAAACAGC	AATTTGACAGAAGGTGCCATGC	3	1.59757	133	3	1.8431	133	3	1.36441	133
82	RM14333	GGAGTCTCCTGTATTCCTTGTGAGC	AACCAAGTCACACCTTCTTCATGG	3	1.61468	384	3	1.86019	385	3	1.3816	395
83	RM14335	TCGAACCACACCGAGCGATACG	AGCTTGCTTCCCTCCAATCACTCC	3	1.65139	272	3	1.90131	267	3	1.41848	272
84	RM14336	GCCATACAAATCCATGCTTTAGCC	ATGTAGCCCATTCAATCCGTAGC	3	1.66893	394	3	1.9227	354	3	1.4365	405
85	RM14337	GCCATACAAATCCATGCTTTAGCC	ATGTAGCCCATTCAATCCGTAGC	3	1.66893	394	3	1.9227	354	3	1.4365	405
86	RM14339	GATCCATGCCATGCCTACATGC	GCCGGAGTGAGTGACCAGATGC	3	1.68394	190	3	1.93808	190	3	1.45157	184
87	RM14340	GGAGAAACAGTCAGGGAGACCAAACC	ACACCCACTGCACGTTCCTCTCC	3	1.69488	240	3	1.95129	234	3	1.46221	249
88	AUT14344	CTCTCCTCTCGCTCGCTGTTCC	GAGTGGTAATTGGGCTTGGATGG	3	1.74429	174	3	1.99646	177	3	1.50977	174
89	AUT14347	CTGCGTCAGATTTCTCCTCTTCG	ACATTCTCGCTTGCTCCTCTCG	3	1.88745	236	3	2.13721	238	3	1.64308	240
90	RM14349	GATCCTTAGGCATGGAATGATGG	CGTGTTCACTGAATATGGGAAAGC	3	1.9302	238	3	2.225	228	3	1.68461	235
91	RM14350	TGGGTGGTTACTGACGGAGAGG	AAACCGCCATCTCTCTCACTCC	3	1.93787	267	3	2.23638	267	3	1.69227	267
92	RM14351	TTTGAGGAGGACACGCATAACC	AATGTCCGAGAAGTGACGAGTCC	3	1.93814	304	3	2.23665	290	3	1.69254	304
93	RM14352	GAGAGTAACCCAACGAATCTAAGC	CAGTATTATTGCTCCACCAACC	3	1.96596	309	3	2.25773	234	3	1.71634	273
94	RM14357	ATGACGATGGCGGTGAAGTGG	CGCCATTTACGAGGCAGGAAGG	3	1.9917	163	3	2.36662	159	3	1.7418	161
95	RM14359	CATCGAGATTGCCTGAGATAGTGC	TGAGCAGAAGGATGGGACTTAGG	3	2.01977	194	3	2.42248	156	3	1.76979	154
96	RM14360	CTCCTTGGATTTGTGCTTGTGC	CCTATAGCCCTCCTCTCCTTTGC	3	2.03393	183	3	2.43683	157	3	1.78397	573
97	RM14362	CCCATTATTCCCGCGATTCTCC	GTCAAGAACGTTGTCGCCGAAGG	3	2.06705	420	3	2.46966	413	3	1.81833	420
98	RM14363	TTTGCACTGGTCTCTCTAGTTGG	TCTAAACGATTGGGAGATGAGG	3	2.06811	96	3	2.47071	96	3	1.81939	96
99	RM14364	CTAGGTGAGCCGAACACAAATCC	TATGTCTCTGCTCGTCGCTACCC	3	2.11677	196	3	2.51958	196	3	1.86851	194
100	AUT14365	AAGATTACCCGGGATTGTAGTGG	AGTCTAGTCGTCCTCTTCACATGG	3	2.12874	97	3	2.53733	97	3	1.88045	103
101	RGNMS1058	AGTCTAGTCGTCCTCTTCACAT	CAGAATTCAGGGAAGCTACTAC	3	2.12882	182	3	2.5374	182	3	1.88053	188
102	RM14367	AGAACCGGTAACCCTCACAATCC	CCTCAAGTAGCAGCAATGTATACGG	3	2.25131	180	3	2.64796	189	3	1.99708	185
103	RM14374	CATGAGACAGCGAAGAACAATGG	CCGGTACTGTACTGAGACTGAGAGG	3	2.36531	99	3	2.75908	90	3	2.09298	99
104	RM14375	GGTTGATGCTCATATCCAACAGC	ACAGTAGCAGCAACAGGCGTACC	3	2.3907	248	3	2.78454	254	3	2.11868	248
105	RM14376	ACCGTTAATCCAACAACCAGAGC	GAAAGGAACAAGGGAACCAACG	3	2.39353	374	3	2.78737	365	3	2.12151	365
106	RM14377	AGTGGGCGTTAGCTTTCAATCC	GCCTGAGGACATACAGAAACAGC	3	2.39418	161	3	2.78801	158	3	2.12215	165
107	RM14378	AGTAGGTGGCTGCATTGGTTTGC	GTGGCTTACCTCGAGGGAGAAGG	3	2.4111	235	3	2.85184	217	3	2.12953	214
108	AUT14379	ATGCAACAGGGAGGTGCTTGG	TGAATCTGAAGATGCCCAAGAGG	3	2.43223	430	3	2.8732	424	3	2.15088	412
109	RM14380	GATGACACGAAGTCACGAACACG	ACGCTCCAAATGGGAGATTTAGC	3	2.46281	144	3	2.90593	140	3	2.18296	140
110	RM14382	AAGAATTGGGTGGGATAGTAGGC	CAGGAGAACAATGCAGTAGAACTGG	3	2.60435	399	3	3.08027	399	3	2.319	395
111	RGNMS1201a	CTGTCAAAGTTATCCCAAAGTT	TCCTTCTTGTACGCTACCTTAT	3	2.63107	399	3	3.09604	396	3	2.33468	399
112	RGNMS1347	CTGTCAAAGTTATCCCAAAGTT	TCCTTCTTGTACGCTACCTTAT	3	2.63107	399	3	3.09604	396	3	2.33468	399
113	RM14384	CAGACAAACAAACAGAGGCTACAGG	TTTCGTGCAGTCGATCTAACACC	3	2.63289	196	3	3.09786	198	3	2.3365	196
114	RM14385	GATCGAGCGAACGACTTATTTCC	CACACTGCAACCAGCTAGAATACC	3	2.65185	398	3	3.11908	388	3	2.35613	395
115	RM14388	GCGAACCAGTCCACTTTGATCC	GAGGAAGGGAAGAAGGAAATAGAAGG	3	2.68575	152	3	3.155	149	3	2.38896	146
116	RM14389	AGCTCATGCCAGAGTTATGATGC	TGCTAGAACCTTGTGAGCTTATCG	3	2.68689	217	3	3.15615	225	3	2.39008	217
117	RM14390	CTTGCTCGTGGCAGAAGTATGG	GCATAAGCAGAAGCACACGAAGG	3	2.70581	170	3	3.1751	167	3	2.41246	167
118	RM14391	GGGAGCAAATTTGATAGGTACGG	ATGTGACTGCTGCTGGAATTAGC	3	2.72037	292	3	3.1892	481	3	2.42607	240
119	RM14392	ATCCCTTGAGCCAGCTCTCATGC	ATCGTCGACGTGAGGAGCATACG	3	2.73076	180	3	3.19879	180	3	2.43532	180
120	RM14393	ATGGCATGCAAGAGCATATGTGG	ACGACGTGCATGGTCTGAAACG	3	2.77933	97	3	3.24335	97	3	2.48227	97
121	RM14394	GCAGATGAGCTTCAGTGCTAGGC	TCAGCACAGCATATTGCAGACC	3	2.79224	199	3	3.26847	179	3	2.4952	171
122	RM14395	AATATCCGCAGCCGAAACATAGC	ACCGACCAAACCAACACAATCG	3	2.83829	296	3	3.31277	266	3	2.54076	282
123	RGNMS1085	AATCGCGCGGATCAACAGACT	GTCGAGGTGAGGCAGAGGGAC	3	2.83854	157	3	3.313	127	3	2.54101	143
124	RM14396	TTGGGTTCAACTGGAACTTTGG	GCTCAAATCCTACTGCTGATTTGC	3	2.8478	191	3	3.32224	182	3	2.55026	200
125	AUT14397	CGATGAAGAGCCAATCCTTCAGC	TGCTCGTCCCTTCTACAAACAGG	3	2.85872	196	3	3.3332	186	3	2.5612	196
126	RGNMS1153	GAGGAAGATTAGTTTAATCCGA	TGAAGAAGTAGGAGAAGAGGAA	3	2.88542	326	3	3.36055	323	3	2.58296	323
127	RM14399	ATCGCCATGGACCATCTTCTCC	GCATCAAACGATACACGCACAGC	3	2.88545	239	3	3.36057	236	3	2.58299	236
128	RM14400	GGCAGCGAGTAAGTGTAGATTGG	TGTTGGTATAAGACAGGTGCATGG	3	2.89553	326	3	3.37065	308	3	2.59343	308
129	RM14401	AGCGAGAGCGCTTGGATCTGC	CGCCATGGATTTCGACGAGTACG	3	2.9096	184	3	3.38467	184	3	2.60748	184
130	RM14403	GCATCGTCCCGATTCTCTACC	GAAGTAGTTCAACCCGGTGATGG	3	3.0002	262	3	3.51015	212	3	2.70581	242
131	RM14404	GCATCGTCCCGATTCTCTACC	GAAGTAGTTCAACCCGGTGATGG	3	3.0002	262	3	3.51015	212	3	2.70581	242
132	RM14406	GCGTGGATCCCACACGAATACC	ACGCAGCGAAGGGCTTTCTCC	3	3.01785	267	3	3.51705	264	3	2.72106	261
133	AUT14409	CCCTGTTGATGGTTGATTTCTCC	CAAGATCAAAGCACATGAGTCTGC	3	3.07654	152	3	3.57524	149	3	2.77011	146
134	AUT14411	CATGTAATCGCACCATGTTTGG	CACAATGTCGACCTCCAATATGC	3	3.10016	366	3	3.59887	388	3	2.79297	378
135	RM14412	CTTTGGTGGGTGTTGGGCTTGG	TGGACTTGGCCGCTGTTCTGG	3	3.14294	98	3	3.62917	100	3	2.82421	96
136	RM14415	CTCGGAAACTTCCTTTCCTTTCC	TCATCTCGTCAACCACGTCTCC	3	3.17967	184	3	3.66612	187	3	2.86086	187
137	RM14416	CTCAACGCAAACCACCCTCTCC	AGAAAGGCAATCGCACCGATCC	3	3.18728	175	3	3.67373	169	3	2.86847	175
138	RM14417	GCCGATAATTCAGAGAAGAGATGAGC	GTCTCTCGGAGTACAGCCACAGC	3	3.19143	175	3	3.67792	165	3	2.87262	171
139	RM14420	AACGCTCTCTCAATCTCTCTGC	GTCAATGATGGTCACTTGATGC	3	3.21602	198	3	3.70198	186	3	2.89673	180
140	RM14421	GTTGATCTGCGCTTGGGTAAATCG	AATCCCTCTGGCGAAGGCAAGG	3	3.22062	92	3	3.70696	92	3	2.90131	92
141	RM14423	AGTCAGTCAGTCCAATTCAGTCACG	AGGACGACGACGAGTGTAACTGC	3	3.25329	258	3	3.73857	219	3	2.93206	219
142	AUT14424	GGGAGATAATGGCGGTTGACTTGC	CGCCGGCTTTCGCTTTATTCC	3	3.26508	194	3	3.75178	194	3	2.9527	176
143	RM14426	CTGTGCACACAGGCTCAGCTACC	CTACCTATGCCATGTTGCCATGC	3	3.33835	88	3	3.82416	88	3	3.00365	88
144	RM14427	CTCGCGAGCTCACATCTGTTGC	CCACCTGCACTGCACATACACG	3	3.33848	178	3	3.82429	178	3	3.00378	178
145	RGNMS952	GCACAGAGATCATATGTAGTCG	CATCAGACAAGCAACATCCTAT	3	3.33857	127	3	3.82438	127	3	3.00387	127
146	RGNMS979a	GCACAGAGATCATATGTAGTCG	CATCAGACAAGCAACATCCTAT	3	3.33857	127	3	3.82438	127	3	3.00387	127
147	RM14428	GTACTACCCAATTCCAACACTGAACC	TCTTCTCTGTTCGCATGTGTATCG	3	3.3388	140	3	3.82461	140	3	3.0041	140
148	RM14430	AAGCAACGCAAGAACCCTTGG	ATGGCCGTCCAATAAACCAACC	3	3.35616	198	3	3.84242	212	3	3.02186	206
149	RM14432	CCTGCTATTAAGGAGTCAAGATCTGC	GCTATCCTATGAAATTGGCTGTGG	3	3.41393	128	3	3.89632	144	3	3.08047	138
150	RM14433	GCCCAAAGCTATTGTTCATTGC	CGGAATATGGTATCGGTACTGTCG	3	3.43012	182	3	3.92134	183	3	3.09666	178
151	AUT14434	CCACCCAACTCATCTCCTCTCC	CACAGTGATCGTTTCACACATGC	3	3.4325	616	3	3.92369	628	3	3.09901	614
152	RM14436	CTGACGCCGTCTTGCGTTATTCC	CGGCGACTTCGACTACATCAACG	3	3.49202	161	3	3.97576	172	3	3.15875	172
153	RM14443	GACCGCCGCTCTGATATAAAGG	TAACACCCAGTACGTCGTCAAGG	3	3.60812	194	3	4.07953	185	3	3.27658	194
154	RM14446	GTTCCATGGATCTCTCGTTTGG	CAACTACTACAGTTGAACTCCCAAGG	3	3.62314	199	3	4.0946	199	3	3.29305	199
155	RM14447	CTATGGCGATTTGTGATGGAAGG	CGTGAAGTGCTGGAAGAGGAACC	3	3.63432	198	3	4.10611	198	3	3.3046	198
156	RM14449	TGGTGTACTGCCTGCCTCTGC	ATCTGTCCCTCCGCCAACACC	3	3.65314	87	3	4.12741	87	3	3.32205	87
157	RM14451	AAATAAGACACGGAGGAGATCACG	CTCTCCCGAATCTTCTGGAACC	3	3.69909	325	3	4.17127	325	3	3.36657	325
158	RM14452	AAGTCAACTCGAACCTGCACACG	GGTGGGTTCGTTTGTTTCTTTCC	3	3.74947	147	3	4.22287	147	3	3.41657	147
159	RGNMS1189	GATGAGCGAGTAGAGTTTCTGT	AATAATGCAAGGAATCAAGAGA	3	3.74964	386	3	4.22304	387	3	3.41674	386
160	RGNMS1178	AGTACTGAGGTGGTATGGTAGG	ACAGAAACTCTACTCGCTCATC	3	3.74991	290	3	4.22331	290	3	3.41701	290
161	RGNMS1254	AGGCGATTGCTCTGCTCAAGT	CTAGACATCAGATTCGTCAAGA	3	3.75527	163	3	4.22865	158	3	3.42241	158
162	RM14455	GAGGTGTAGAACGGGATCATGC	CGAGAATAGCTCCGAGATCAACC	3	3.76349	149	3	4.23693	149	3	3.43125	149
163	RM14456	ACCTTTCTGCCAACACTGAAACC	TGGTTGGTGATGTCGATCTTCC	3	3.76433	95	3	4.23778	95	3	3.4321	95
164	AUT14458	CATTGTCCTCAACTCGATCTCC	TTCCATTCCCTCATCTATAGCC	3	3.76521	149	3	4.23864	137	3	3.43298	159
165	AUT14459	CATTGTCCTCAACTCGATCTCC	TTCCATTCCCTCATCTATAGCC	3	3.76521	149	3	4.23864	137	3	3.43298	159
166	RM14460	TGGATTCGTGGATATGGACAGC	CGGTTAGACCGCACAATGAACC	3	3.77554	274	3	4.24858	267	3	3.44259	268
167	AUT14461	GTGGGTTTGTGTTTGGAGAGACG	GTGTTGGTGAGCATAGCAGTTGG	3	3.78247	157	3	4.2555	131	3	3.44952	141
168	RM14462	TCTGTATTCAAGGAGGGCTAGATGC	GCTGGAGAGATGCATTGACTGG	3	3.79633	260	3	4.26934	189	3	3.46338	230
169	AUT14464	AGCAACCAACCCAGTAGTTAGCC	GCTCATTTGCATGCTGTGTTAGC	3	3.8053	190	3	4.278	184	3	3.47234	182
170	AUT14465	GACGGAGGAGTTCGAGAGGAAGC	GTGAAGCGACTAGGCGGAGAAGG	3	3.84506	234	3	4.31654	231	3	3.51657	231
171	RM175	cttcggcgccgtcatcaaggtg	cgttgagcagcgcgacgttgac	3	3.84513	94	3	4.31661	91	3	3.51665	91
172	RM14475	GCAAGGTGTCCTCCAAAGAAAGG	TCGGTCTCCTTGTCTCTCTGACC	3	3.96152	664	3	4.39246	693	3	3.58641	652
173	RM14476	AGCCATCAAGCATGGATTAGAGC	ATGTCGCTCTCCACTGTCAACC	3	3.96796	360	3	4.39893	357	3	3.59283	363
174	RM14477	AGAACACAAACCCAATCCAGAGG	GAGCAGAGGTCTAGCGTTCAGG	3	3.96846	169	3	4.39942	163	3	3.59334	163
175	RM14478	GGCTGTAAACGATTCTAGACTTGAGG	TCAATGTCTTCTTCCCTCCAACG	3	4.12208	292	3	4.54949	349	3	3.74659	296
176	RM14480	AGGTGGTGGTGGTGGTTCTTGG	GACGTCACTGGCAGCTCACTGG	3	4.17904	293	3	4.61923	293	3	3.80292	695
177	RM14482	GGTCGATCACCACCACCTTCC	CCAGTACGTCAAGGCCAACTCC	3	4.21104	187	3	4.65128	187	3	3.83666	187
178	RM14484	CTACTTCTCCTGTCCAAATCATCG	CGTCTCATTTCTTGATCTCTACCG	3	4.25626	96	3	4.68786	86	3	3.87947	88
179	RM14487	TGCACACTCTGCCTAAATTTGC	CGAGAGTGTCTGTCTAGATTTCAGG	3	4.28232	391	3	4.70333	348	3	3.89533	342
180	RM14490	GGAGACGACGGCTAGAGCCTAGAAGG	GCCGACCAGTACAACCACTTCAACG	3	4.35074	191	3	4.76762	191	3	3.96361	191
181	RM14491	TAAAGAAATCGCGGCGAAAGAGG	CTCCACGAGCCCATCTCCTTCC	3	4.35189	271	3	4.7688	301	3	3.96478	277
182	RM14493	AACTTGACCTGCTCACTTTCTCG	AATAGGGCCTAATTCGCTTGC	3	4.354	197	3	4.7709	234	3	3.96687	232
183	RM14494	CCATCACAAGGACCACTGAAACC	TCCTCCAGTACTCTGAACTTTGAAGC	3	4.36959	361	3	4.78813	353	3	3.98433	361
184	RM14495	ACCTCTTCCCGGAGTGGATCG	GAGGTTGCATGAGCCGACAGG	3	4.40788	397	3	4.82707	394	3	4.02316	397
185	RM14496	CTCCATCTTGCGCTTGTTCTCC	CCTCGCTTAAACCCTTCTTCTCC	3	4.41803	175	3	4.83718	175	3	4.03351	175
186	RM14497	CTAATCGGCGGCATGAGGATCG	CCGTGATGAAGATGGAGGGATCG	3	4.42038	297	3	4.8391	297	3	4.03544	297
187	RM14500	TCACCACAAGCATTGTTTACCC	GGTGCTCATTAGTTCGCATGG	3	4.46008	364	3	4.877	406	3	4.07282	372
188	AUT14501	ACCGGAAGAAAGCCCATCACG	CCGGTAGCGTCTGAGCTGTTGG	3	4.46098	198	3	4.87795	198	3	4.07373	212
189	RM14507	GTTCATCCCAGAAGCCAAGAGG	AAGCGGACAACTTACCTGTTTCG	3	4.54789	91	3	4.96391	91	3	4.1611	116
190	RM14510	CCTTGTTTCAAGGGCTGTATGC	AATCACTGGCAATATCGTGAGG	3	4.56821	265	3	4.98435	267	3	4.18234	272
191	RM14511	GGATCGGACTGACCTGCATACG	CTCTTTGCTTCCGGTTTGATTCC	3	4.65792	238	3	5.08963	232	3	4.26775	238
192	RM14512	CAGTGCATTCATGGTCACATCTGC	CTCGCTTGGAAACAACGAGACG	3	4.66612	590	3	5.098	553	3	4.27596	554
193	RM14513	CAGTGCATTCATGGTCACATCTGC	CTCGCTTGGAAACAACGAGACG	3	4.66612	590	3	5.098	553	3	4.27596	554
194	AUT14514	CCATGACTGTCTTGTTCAACTTCAGC	TCGGTGGTGCTACCTCATAATCC	3	4.70257	271	3	5.13494	233	3	4.31276	221
195	RM14515	TGCTATAAGTGCAACGACTGTCC	ACTTCAGAGATGCTCATGGATGG	3	4.70623	161	3	5.13856	161	3	4.31637	161
196	RM14516	CTGTCCGCTGTAGCAAATGTACC	TCTTGCTAGCACTTGAGATCTTCG	3	4.7075	216	3	5.13983	259	3	4.31764	256
197	RM14517	GCTTCTTGGCCTCCTGGATAGG	GGGCAGATCCACTACTACAACACG	3	4.72787	228	3	5.17523	228	3	4.33589	228
198	AUT14519	CCGTCGTGTCGTACTGGTAGTCC	TCCACAGCCTACCTAGCTTCTCC	3	4.80768	199	3	5.25247	193	3	4.41317	199
199	AUT14523	CCTTCCCTGAAAGTATTCGTTCTCC	GAGAACGTCTTCATTGGATGTTCC	3	4.97629	165	3	5.40274	167	3	4.55372	171
200	RM14524	GCACTTATCCATTTCCAGCTTGC	CCTACTCGTCTACCAACAACAATACG	3	5.00329	98	3	5.42746	198	3	4.5764	102
201	RM14525	GAACAAGCTCGACGTAGATAGG	TTAGTACTAGCAGACGATCAGAGG	3	5.00431	129	3	5.42858	122	3	4.57742	127
202	RM14527	AACGTCTTGATAAGGCAGAACC	GGTCAATAGTCAACACAGGATCG	3	5.09351	255	3	5.52357	250	3	4.667	252
203	RM14530	GATTCTGCGTCTCGACGTAAAGG	CCATCACAAGTGTTCCATCTGTCC	3	5.17413	92	3	5.60881	92	3	4.74826	92
204	RM14531	TTATTAGGACGGAGAGTGCACAGG	GGAAGAGGAGGAGGAATTCTTGG	3	5.20236	272	3	5.64843	273	3	4.78787	272
205	RM14532	ATTCCTCAGTTCCATCCTCATCG	TGGGCGTTCTTATCCAGTATTCC	3	5.20698	114	3	5.65305	114	3	4.79249	114
206	RM14536	CGCCTGCAGAAACAGGTAGTACG	TTCTCACCTGCACGCTACTTACG	3	5.22166	298	3	5.6723	286	3	4.81064	272
207	RM14541	TAGGCTGCAACTTTATGAGTGG	GCTACAGCCCAACAAATATCTCC	3	5.26435	380	3	5.71138	332	3	4.84948	409
208	RM14542	CCTTGAGCGAGAAGAAAGTGTGG	ATTATGTAGCAGGCAACGCATGG	3	5.28778	172	3	5.73385	172	3	4.87592	172
209	RM14543	TGCCATGTGAGAGAATGGATTAGG	AAAGAGTAGCCGTCCTAGTGATTGG	3	5.30949	299	3	5.7554	191	3	4.89745	301
210	RGNMS1147	TTGAACAAACGAAAGCTTAGTA	TGGTTTGACTAGTCCTCTCTCT	3	5.35104	275	3	5.796	272	3	4.93849	275
211	AUT14546	AGGATTTCCTCGCCGTTTGTGC	CATTCGTCCAAGATTTCGCAACG	3	5.36592	184	3	5.81084	166	3	4.95337	190
212	RM14547	TTGTATCGCATCACCCTTCTTCC	GAGGCACAGACAGCAAAGTATTATGG	3	5.40429	175	3	5.84964	175	3	4.99733	178
213	RM14548	TGTTAGCTACCACCACCACTACCC	CTAGCCTGGCTTTGTATGTTTGC	3	5.42272	538	3	5.86943	595	3	5.01572	516
214	RM14549	CAGAACCCTAGCCTCCTCCTTCG	ACCGAAACGAAGCTTGGATAACTTGG	3	5.42452	167	3	5.87129	164	3	5.0175	167
215	RM14552	GGGTGGACTGATTCAGGACTGG	CATCACACGAGACGAGCTTTACC	3	5.47152	251	3	5.91742	277	3	5.06457	248
216	RM14553	AAGTTGAATACAGCGCCGAAACC	GCTTTGGGAGATTGTTGTTTGACG	3	5.48667	78	3	5.93246	78	3	5.08038	78
217	RM14554	ATCCTTGTGATCCTCAACCTTCC	AGCAGCATTACGGGTGCTACG	3	5.52417	226	3	5.97083	226	3	5.11781	198
218	AUT14556	AAAGCCTTCCATCCAACCATCG	CAGTAGTGTTGCTGCAGTGAGGTAGG	3	5.5566	188	3	6.00644	166	3	5.14899	174
219	RM14557	GTTGTCCCTCCTGGCTCCTTGC	GAGGAGCACAAGCACCTCAATGG	3	5.55794	91	3	6.00776	93	3	5.15031	91
220	AUT14559	GATCAATCTCGCAACCGTATCG	AGAGGGCTCAGAGAAGGAAGTGC	3	5.56762	234	3	6.01711	237	3	5.1603	238
221	RM14560	CGCGCAGAGCTCAGAAACTAACC	GACGGCCAGTTCAGCATGTCG	3	5.61859	255	3	6.06785	255	3	5.21072	255
222	AUT14561	AGTCGCTGGTTCGCTTCATCG	ACTCACTGCACCCGTGATTTCC	3	5.61976	194	3	6.06902	180	3	5.21189	184
223	RM14562	TTGCCTGAAGAGAGACTAGACATGG	GCATGGTTTGCAGTTAAGATAGGG	3	5.6669	274	3	6.11684	216	3	5.25793	228
224	AUT14563	CTGCTGCTCCGCTACACAAAGC	TTCGGACTCGTGCTCCAAACG	3	5.6774	128	3	6.1268	124	3	5.26838	120
225	RM14566	GCGAGAGGCGAAGGAAATAGAACG	GACGCGATCAGGAACCCTCTCG	3	5.7623	173	3	6.20936	158	3	5.35341	173
226	RM14565	CGAGAGGCGAAGGAAATAGAACG	CTCCTCCTCCTCCTGGTTCTCC	3	5.7623	101	3	6.20936	83	3	5.35341	101
227	RM14567	TTTGTTGGGAGCTTCTTCATGC	TGCATACCATACAGCATGCTTCG	3	5.76556	460	3	6.2126	498	3	5.35668	476
228	RM14568	CCCATTAGGATCAGTAGTGGATGG	GATCCGTCTTGTTGTTCTCAAGC	3	5.7706	335	3	6.21768	338	3	5.36174	335
229	RM14572	GGTCACTTGGAAGATTGATGAGC	CTTGAGGTTTGGTATGGTTTGTGG	3	5.86569	197	3	6.3378	197	3	5.45775	197
230	AUT14573	TCTCTGCACCCTGTTCACATGC	GCCTTTCCCAATGGAATATCAGG	3	5.88376	147	3	6.35505	165	3	5.47643	145
231	AUT14574	TTCCTTCCGCCGGAGTCAACC	AGAACCGCAAGACGAAATCACAGC	3	5.88823	154	3	6.35956	132	3	5.48092	152
232	RM14575	GACAGTTTGTGTTGCTTGGTTGG	GTCCTAACGGTGCAATAAACATGC	3	5.89174	257	3	6.36305	306	3	5.48443	257
233	RM14576	CCACAATCTCCAATTCTCCATCG	CTCTTCTTCGCCACGAGGAACC	3	5.89238	492	3	6.36373	471	3	5.48507	465
234	RM14577	CTCCATTAGGCCCAAGAAGAGC	GATCTAGCTCGGCTAGGGTTTGG	3	5.89732	280	3	6.36858	283	3	5.48968	268
235	AUT14578	GGTGTTCCTGTTCCAATTCTTGC	TCAAACTTGCTAGCCAAAGTAGGG	3	5.89996	199	3	6.37123	195	3	5.4923	189
236	RM14580	AGTGGCCCAGTGTGAGATTGC	GTTCTGTTGCCTCGGTTAATTGC	3	5.93205	151	3	6.40705	151	3	5.52571	151
237	RM14581	CACACCACGCTTTATCTTTGCAACC	GTTTCGAGCTCCAGCAGCAAAGC	3	5.93497	140	3	6.40996	140	3	5.52862	140
238	RM14586	GGTGGTGAGCCAAGAACTGACC	CCTCAAGGAATCCTCGTAAGTCG	3	6.0159	133	3	6.48978	109	3	5.60879	119
239	AUT14587	CGGTGAGCCTCCTACAACATCG	CGTCACAATCAACACGCTCACC	3	6.03184	197	3	6.5056	166	3	5.62494	183
240	RM14588	CACAAACACATGCAATCTCAGG	GTGATTTGTCCTTAACCCTTGC	3	6.04541	94	3	6.52349	100	3	5.6385	85
241	AUT14590	GCATGCTCTCCTTAGGCTTATCG	GCACTAAGCTCGGACACACTTGG	3	6.06421	277	3	6.54268	277	3	5.65968	277
242	AUT14591	CCAAGTGTGTCCGAGCTTAGTGC	TGAGTCAAAGCGAAAGTCAACAGG	3	6.06446	231	3	6.54294	213	3	5.65994	203
243	RM14592	ATCCAACCATGGATCTCATCTCG	CAACCACAGTGATCGGGAGAGC	3	6.06829	127	3	6.54674	127	3	5.66373	127
244	AUT14598	GTGGGAAGAAGAACATCAACTGG	GCACACAAGATAAACCCAATCAGC	3	6.10659	128	3	6.58726	144	3	5.70196	132
245	AUT14602	CAGCTCCTTCCTATCCGTCTCC	TCAGATCTAGCCGAGAAATCAAGG	3	6.19434	189	3	6.67361	183	3	5.79103	207
246	RGNMS1360	AATTCGAAACGAAATTGTAGAT	AGATATAAAGCGTAGCAACCAG	3	6.19443	304	3	6.6737	296	3	5.79112	320
247	RM14603	TAGGGAACTCCATCAAACTGACG	TCGCTTCTACGTTTCAGATTGC	3	6.28702	138	3	6.73582	138	3	5.87127	138
248	AUT14604	TGGCCAATCTGATGTGTAGAAGC	TGTGGCTTAGTCACCATCATACCC	3	6.31224	251	3	6.747	253	3	5.89721	245
249	AUT14608	GTGCGCCGGAATTACGCTTCC	GCAGCACGCAGTTCTCCTTCTCC	3	6.45598	166	3	6.89803	166	3	6.04696	180
250	RM14610	TAGTCCCACCGTCATACTCATCG	ACTCACTGGTTTCCAGGAGAAGG	3	6.52125	178	3	6.96818	178	3	6.11485	178
251	RM14612	TCAAATTGCATGCTGACCTTCG	TTCTACCCAGCTAGCAATCTCAAGG	3	6.56268	187	3	7.00848	177	3	6.15507	187
252	AUT14613	CCTGTGGTTCTATATGAGGAGAGTCC	CATTGTACATGTGCAGCGATGG	3	6.57143	184	3	7.0172	156	3	6.16378	238
253	AUT14614	GCACGCATTGTTCGTGATAGG	GAACCGAACGCAAAGCTAATACC	3	6.58108	164	3	7.02301	153	3	6.16968	155
254	RM14616	CCGAATCTGTGTTCTCCAATTCC	CAACCAAAGAGAACCAACCAAGC	3	6.60468	95	3	7.04658	104	3	6.19296	93
255	AUT14617	GGTTATGCAGGTATTGGCTGTCC	TGCGACGATCATTTAGGAATGG	3	6.61067	178	3	7.05257	166	3	6.19894	172
256	RM14623	CGCCAGCACTATGATCTGAACC	CCTCCATCGAATCACCTCTCTCC	3	6.66376	399	3	7.09665	397	3	6.24068	396
257	RM14626	TATCCGCAGGAGACCTAACTTGC	GCAGGATGTGGATGTGAGAAGC	3	6.76427	263	3	7.21024	279	3	6.34063	255
258	AUT14635	GGCTCACCAAATTAAGAGCTTGC	TGATGATGCTTGCCTTAGTGTCC	3	6.80491	174	3	7.31626	131	3	6.45128	156
259	AUT14633	CTCTCTGGTTTATCCTCCCAAGC	GTAAATAGTCGTTCGGTTGACTCG	3	6.81764	284	3	7.30402	262	3	6.43668	302
260	AUT14634	CTCTCTGGTTTATCCTCCCAAGC	GTAAATAGTCGTTCGGTTGACTCG	3	6.81764	284	3	7.30402	262	3	6.43668	302
261	AUT14632	CAGCCCACTACAAGTCTACTTCTGC	ATACTGTGCAGGAGCGGAACG	3	6.84545	162	3	7.27764	129	3	6.41001	159
262	AUT14630	GTCCAGTGCGTGGAGAGGTAGC	CGAAACTCGGACACCCACTCC	3	6.84979	241	3	7.27256	235	3	6.40579	229
263	AUT14629	CACGAGAGTATGCCATGAACTGG	CATGCCAACTTGAAATGCATCC	3	6.85566	242	3	7.26664	278	3	6.39993	225
264	AUT14637	CGCGTTCGATCGATCTCTCTCC	GGCCAGAGTACGTGCCAGATGC	3	6.98391	141	3	7.39787	147	3	6.53825	141
265	RM14639	ATAAGAGGACTACGCCAAACAACACC	ATGGCTGGAATCCATTCTTTGG	3	7.02312	355	3	7.43805	417	3	6.57869	281
266	RM14640	CTGTCGGGAGGAGACGACATGG	GCAGCAACTGGTTAGGCTTCTCG	3	7.04616	153	3	7.46114	153	3	6.60165	153
267	RM14641	GCCTAGACGATGTAGCTGGATGC	TGTTACTGTTGCGAAGTGACTGG	3	7.04688	183	3	7.46186	179	3	6.60237	183
268	AUT14643	CGTCGTAGTACTTGTCGCACAGC	CGTCACACCGACTTAACACTTGG	3	7.17625	220	3	7.60974	216	3	6.72536	212
269	OSR13	catttgtgcgtcacggagta	agccacagcgcccatctctc	3	7.17625	220	3	7.60974	216	3	6.72536	212
270	OSR13	CGTCGTAGTACTTGTCGCACAGC	CGTCACACCGACTTAACACTTGG	3	7.17625	220	3	7.60974	216	3	6.72536	212
271	AUT14644	CATACTTCAGAACCAGACAAGC	CTCTTGAGTCACAACTGAAACC	3	7.19234	124	3	7.6266	128	3	6.74286	118
272	RGNMS1342	ATAAATAATCACGGTCCAATTC	GTCGTTACTTGATTCGGTAAAT	3	7.22981	333	3	7.67194	343	3	6.76939	329
273	RM14645	GGTCCAATTCACACCAGAACG	TGGTGTGTAACTGCGTAATTGTCC	3	7.22982	248	3	7.67195	258	3	6.7694	244
274	AUT14647	TCTCGACCTGGCTCTCCTCTAGC	AGTGCACGGACATGTCACTCTCG	3	7.23049	165	3	7.67263	168	3	6.77007	165
275	AUT14648	GTCTTTGATAGCGGCTTTGTCC	GGATGAGGGAGTAATGTCTCTTGG	3	7.28317	147	3	7.74361	137	3	6.81777	139
276	RM14649	AAGGCATCATGGCATCCTACAGC	TTAGCCTGAAGATGTCCTCCCATTCC	3	7.28548	87	3	7.74622	89	3	6.82008	85
277	RM14651	GCAGCTAGATGGAAATTCAGTTCACG	AAGCAATCACTTCGGTGACAAGG	3	7.29123	276	3	7.75187	314	3	6.82602	354
278	RGNMS1164	ACTAGCTTTAATTTCATCTCCG	AGTTCACGCATTCTTCTTTATT	3	7.29142	196	3	7.7521	234	3	6.82629	274
279	RM14652	CAGGTCGGGTACAAACGCAAGG	AACCCTTTGCTTTCGCCACAGG	3	7.30204	154	3	7.76388	154	3	6.83656	154
280	RM14653	CAACCTTTCGACGGTACACACG	TTGTCTGTGGTTGAGCAGTCAGC	3	7.33177	394	3	7.79789	395	3	6.86738	394
281	AUT14655	CTAACCCGGAGCCTCTCGTTACC	GATTGGTTGTACGTGCCCTTCC	3	7.37186	253	3	7.86166	251	3	6.90434	245
282	AUT14656	AGGGTTCTTCAGTATTGCCAAGC	GCAGTAACTAATAGCCGTCTTCACC	3	7.37453	171	3	7.86432	165	3	6.907	165
283	RM14663	ATGTCAGCAACCAGCGTAACTGC	AAAGAGCATGAGGCATACTGATCG	3	7.51888	395	3	8.00037	404	3	7.02572	570
284	RGNMS1259	GAAGACATTTAACTTTGGCACT	ACAGAGAGATGAGAAAGAGCAT	3	7.51894	341	3	8.00044	350	3	7.02578	516
285	RM14665	AGGACAAAGCTTGTGCACTTTGC	AGCTAAGCCGTGACGATGTATGC	3	7.68236	104	3	8.15953	104	3	7.17815	104
286	RM14667	GAGGGAGAGAGGGTGATGCTACG	CAGCAAACAGCCAGTGATACCG	3	7.71572	223	3	8.19274	171	3	7.21031	336
287	RM14668	GAGGGAGAGAGGGTGATGCTACG	CAGCAAACAGCCAGTGATACCG	3	7.71572	223	3	8.19274	171	3	7.21031	336
288	RM14669	GAGGGAGAGAGGGTGATGCTACG	CAGCAAACAGCCAGTGATACCG	3	7.71572	223	3	8.19274	171	3	7.21031	336
289	RM14673	GGGATCTGGAGGAGCAGCTTGG	TCGAGATCGATCGAGCAATGAGC	3	7.81778	276	3	8.2825	279	3	7.31842	264
290	RM14675	TCATCCCAATAACGCCTAACACC	GTCTCCTCGTCTCCTCGTTCG	3	7.87766	282	3	8.38007	283	3	7.40828	285
291	RM14677	ATATGTAGAGGCAAGCACACAGC	TAAAGTATGCGGGAAGGTCTCC	3	8.01614	166	3	8.51292	162	3	7.54193	158
292	RM14679	GCTCGTAGTAGTATTTGCAAGC	TGTACTAGGAGCACACATACCG	3	8.1279	380	3	8.63276	383	3	7.65399	633
293	RM14680	ATACCTCCCATGCATATGTAGC	GATGTACCTGTTGAAGTGTAGGC	3	8.1419	99	3	8.6512	95	3	7.66905	95
294	RM14681	GAGCAGGTACTTCCTCCTGATCC	CCTGCCCGTACCACTACTACTGC	3	8.15855	193	3	8.66786	193	3	7.68572	193
295	AUT14682	ATCTGGTCATACGACGACATGG	GCTGACAGGACAAGAATCAGAGG	3	8.15887	86	3	8.66819	89	3	7.68605	81
296	RGNMS1108	GTGATAATAGAACGACACCGA	TTGTAACTAGCAATCTGTCTGC	3	8.25239	321	3	8.76462	317	3	7.82005	321
297	AUT14686	AGGAGGAAGGAAGAACAGAGTTGC	CTGAGTGCGTGCCATTTATTTCC	3	8.25245	138	3	8.76467	140	3	7.8201	117
298	RGNMS1118	CAACTCTGTTCTTCCTTCCTC	TTGTAACTAGCAATCTGTCTGC	3	8.25245	376	3	8.76467	372	3	7.8201	376
299	RM14687	TTCAGATTGCTCGTTAGGAAGC	TCCAGTCCATCAGGTGACTCC	3	8.27421	108	3	8.78639	106	3	7.84209	108
300	RM14689	GATGCAGTCACCAATAACATGTGC	GGAAGGAATCCTACGTCAGTCTGC	3	8.35111	326	3	8.8392	326	3	7.89869	326
301	AUT14690	CCACCCTTTGTTCTGAGTCTATTGC	GTCGAATGGCATGAACGTAAAGC	3	8.40072	230	3	8.89027	228	3	7.95213	218
302	RM14691	CTACTTGCTTTCGAGAGGGTTGC	CGTCCCTGTAAACCTTGATGAGC	3	8.40293	191	3	8.89245	191	3	7.95432	191
303	RM14692	CGTCGTTGACGTTGCAGTTCG	GGAGTAGCAGCCTCTGGTTCATCG	3	8.4363	146	3	8.92713	143	3	7.98182	146
304	AUT14693	TGCAAGTTGGACTTCAAAGAGG	TGGATTCCTTCTTCCTTTCTCTCC	3	8.44413	185	3	8.93495	163	3	7.98958	159
305	AUT14694	TCAAACCAAGGTCCTTCAACTGC	TTTCTTCCACCGTCCATGTATCC	3	8.45711	381	3	8.94702	382	3	8.00213	372
306	AUT14695	TCAAACCAAGGTCCTTCAACTGC	TTTCTTCCACCGTCCATGTATCC	3	8.45711	381	3	8.94702	382	3	8.00213	372
307	RM14697	CGCAAGAATTCATTCGGTCTCG	GCGATGGCGTAGGAGAAGAGC	3	8.48022	287	3	8.96457	287	3	8.02244	287
308	RM14698	TAGATCGTCTTTGTCGTAGAGC	TAGTCACGAAGCTATGTGTTGC	3	8.51331	365	3	9.00159	318	3	8.0548	338
309	RM14701	AAACAACCGACGTGTTAGATCTGG	GATGGAATATGAGCGATGACAGC	3	8.56194	246	3	9.02942	236	3	8.09972	238
310	RM14705	GCCACAGGATAACAAACTCACAGG	AAAGCAAAGCTCTCTCGCTTGG	3	8.8145	145	3	9.28006	145	3	8.3311	145
311	RM14706	TCATCACCTCGGATCCGTCTGC	TCTCGTTCTGGATCTGGCTCAGG	3	8.82633	167	3	9.29191	155	3	8.34293	167
312	AUT14707	AAGGGCCAATCCATCCTCACC	CTGCCTCCTCGCCTTTATTCTGC	3	8.87	99	3	9.36841	99	3	8.38198	99
313	RM14708	GCACTGGCCGCCTAATCTCTCC	TTCACCACTCAGCAACACACAAGC	3	8.87848	288	3	9.32057	282	3	8.3899	282
314	RM14709	CCACGGCCAAGTACATAATACAGC	CCGTTCTTGCTGCTCTTCTTCC	3	8.90253	189	3	9.41792	192	3	8.4142	192
315	RM14710	ATCACACGGATGGCACACAGC	GAAGATAAAGCGAAAGGGACCAAACC	3	8.99829	256	3	9.56665	246	3	8.50512	256
316	RM14714	GCGAAGGTGACGCTAATGATGG	ACCAGCATCCGGCAATTACACC	3	9.14727	92	3	9.74777	92	3	12.233	92
317	RGNMS1262	AAGGTTCTCTTGACTTCTGGTA	TACATTTAAGCAGAAACGCTC	3	9.18366	370	3	9.78868	369	3	8.81594	370
318	RM14716	CGTCGATAGCGAGATATCCATGC	TAACCTAGATCAGGGCGACATGC	3	9.20376	362	3	9.81207	400	3	8.83533	366
319	RM14717	TTCAATGCGTAGGATGACTGACG	GTGTAGACGGCGAGGTAGAGACG	3	9.2072	158	3	9.81554	158	3	8.83935	158
320	RM14718	GTTGCCAGCGAGACACTACGG	CCCGGCTTCCTCATCTACTCTACTCC	3	9.23973	154	3	9.82435	154	3	8.86451	154
321	RM14723	GCAAAGTCCTTTGGACAGGTAGC	CGTCCCAGATCAAAGTACACTCTTCC	3	9.27501	195	3	9.87894	144	3	8.90105	175
322	RM14724	GGTGCAAGTAGAAGGAAGGAAGG	AAAGGCAAGCAACGAGAAGACC	3	9.28137	197	3	9.88523	189	3	8.9074	197
323	RM14725	CCACATAAGTATTGGAGTGCATCG	AGATGTTAACCCACGAGGAATGG	3	9.28327	469	3	9.88712	407	3	8.9093	431
324	RM14728	CTCAGCGGACTAGAATGCAAGC	AAACGGATACATCTTCGCAGAACG	3	9.32478	240	3	9.91611	234	3	8.94835	234
325	RM14729	AAATGTAGCGAGTGTGCGTTCG	GCCGTGTGAACACATAACTTTGC	3	9.33254	338	3	9.9583	352	3	8.95626	340
326	RM14730	CATAGTGTAGGAGCCTTCTGTCG	TTTCTCTAGCCAACTACCAGAGG	3	9.34616	206	3	9.97897	200	3	8.96992	200
327	RM14731	GACTTCTCCACTGTAGCATCTGTAGC	GAAGGTATCCATATGTGGAGGTAGGG	3	9.35403	197	3	9.97007	197	3	8.97777	197
328	AUT14732	ATGCTGGTCTGGTCCTTCACC	TTCAGATCTAAACCGAGCAAGAGG	3	9.36655	175	3	10.0011	163	3	8.99028	175
329	AUT14733	CGATCCAAGCGAAAGATTTACC	GCTTCTTCCTCCCTCGTCTCC	3	9.36712	213	3	10.0016	211	3	8.99086	215
330	AUT14734	GAAGCGAAGCCGAACCCTAACG	GGCGATCTCTTCCACCAACTCC	3	9.38022	188	3	10.0146	188	3	9.00364	188
331	RM14735	AATTAACTAGTGAGCACCCGATGG	CGGTCACAAAGTGCCAGTACC	3	9.40756	295	3	10.0646	478	3	9.03147	354
332	RM14736	TCCGAGGAACGGGAACTGATGC	GCCCAACCTAGGGCTAACCTTCTCC	3	9.4105	189	3	10.0688	192	3	9.0345	189
333	RM14737	CAGCTGCAGGAGAGAAGACAGG	CTCTCCAAACATTCTTCCCAACC	3	9.4119	166	3	10.0702	171	3	9.03589	174
334	RM14738	CAGCTGCAGGAGAGAAGACAGG	TCTGCTGAGCACAATGCTAAACG	3	9.4119	253	3	10.0702	267	3	9.03589	278
335	RGNMS1144	GAGAACTCGAACTCCCTTATTT	GTGATTAAATCTCAACCCTTGT	3	9.43298	356	3	10.1006	356	3	9.05742	356
336	RM14743	AAATCGTCGTCCCAGTCATCC	GTCGCCAAGTACAACTCCAACG	3	9.50901	199	3	10.1866	202	3	9.13325	211
337	RM157	cctcctcctcacgaatcccgcc	gggcttcttctccgccggcttc	3	9.54347	135	3	10.2331	127	3	9.17005	125
338	RM157B	CCTCCTCCTCACGAATCCCGCC	GGGCTTCTTCTCCGCCGGCTTC	3	9.54347	135	3	10.2331	127	3	9.17005	125
339	RM14747	GACCCGGCTCATCAGGTTCTGG	TCCCGTCTCCTCGTCCTCATCC	3	9.57157	193	3	10.259	193	3	9.19598	193
340	RM14750	CGTCGGCATCATCAACTACTCC	CTTCGCGGAGGCTAATTTAATCG	3	9.61671	193	3	10.4118	193	3	9.24241	193
341	RM14756	CACGTCCTGATCGAGAGTGACC	CGCGAGCAAAGAGTAGCTTAGTGC	3	9.66044	98	3	10.4625	98	3	9.28477	110
342	RM232	CCGGTATCCTTCGATATTGC	CCGACTTTTCCTCCTGACG	3	9.75562	156	3	10.6338	148	3	9.42257	132
343	AUT14758	TTCTTCTTCGTCTTCTGGTTCC	CAAAGCCATACTAAACCCTAGCC	3	9.7948	296	3	10.6221	278	3	9.42287	279
344	RM14759	GACTCCTTCCTGCTCTCGTTGC	CTGCACCTTTGCACTGAACACC	3	9.80624	195	3	10.6338	187	3	9.43452	171
345	RM14760	CCCTAGTAAATCGTCTCTTCAACC	CAGTGGCACTCAAGTAAGAGACC	3	9.81383	483	3	10.6413	479	3	9.44208	420
346	RM14762	AATCCTTCTCTTCCGGACTCTCC	GGTGTAGAAGAGGTCACGCTTGG	3	9.84787	717	3	10.6794	717	3	9.47618	717
347	RM14764	TCTTGGAGCGGAGGCTTATACC	CTATGTAAGCAAGCCCAGGAGACG	3	9.88026	166	3	10.7112	160	3	9.50379	180
348	RM14765	AATGATCACACACTCTGCTCTCAGC	GCACGATCTTCCTCTTGATGTCG	3	9.88334	199	3	10.7144	203	3	9.50694	187
349	RM14772	GGCGCTAGGTGATCATTTCTCC	TTACCCTCTCCCACCAAATTAGC	3	10.0005	169	3	10.8485	165	3	9.62439	182
350	RM14773	TTGGCTCCTACTCTGGTTTCTGG	CCGGTAGACCGAGAACTTGTCC	3	10.0456	281	3	10.9173	292	3	9.67698	281
351	RM14774	GTGTGAGCTCCAAGTCCGAACC	AGAGGCGACTACACAACAAACAGC	3	10.0571	268	3	10.9288	268	3	9.68845	268
352	RM14778	GTCACAAGCCACTATTAACAGCTTCG	AGATTAGCGCCCATTCTCATGC	3	10.1027	186	3	10.9867	132	3	9.73359	176
353	RM14779	GAAGAACTGCTACGGCGAGACG	GAGATGTCGAGGAGGCGAACG	3	10.1581	146	3	11.0448	152	3	9.78314	146
354	RM14785	GTCTGAGACATTGCTGCCATCATCG	CGGAGGCTTGGGATGGTTTAGC	3	10.2906	224	3	11.1866	224	3	9.91475	218
355	RM14786	GGTGGGAGTAACTCATACACCATCC	ATTGCGTGGTCAGTCTGAGTCC	3	10.3002	188	3	11.2248	218	3	9.92486	174
356	RM14787	GGTGGGAGTAACTCATACACCATCC	ATTGCGTGGTCAGTCTGAGTCC	3	10.3002	188	3	11.2248	218	3	9.92486	174
357	RM14792	CACACCTCCTCCACTTCTCTCG	TACACGAACGTACCTCCTCTTCG	3	10.3957	293	3	11.3216	293	3	10.0203	296
358	RM14793	AACTATGGGTTTCCGTGCCAACG	GCGCATATGCTGCTTGTAGATTGG	3	10.4083	608	3	11.3342	544	3	10.0329	590
359	RM14794	AACTATGGGTTTCCGTGCCAACG	GCGCATATGCTGCTTGTAGATTGG	3	10.4083	608	3	11.3342	544	3	10.0329	590
360	RM14795	GCGCGATAAACGTTTGAGAGAAGG	AAATCAGTCGCGGTTGCTGTCC	3	10.4092	160	3	11.335	138	3	10.0338	144
361	RM14796	ATCGGACGGATCAGCACTCAGC	CTTGACCGGGTTGTTGGTCTCG	3	10.4172	92	3	11.343	92	3	10.0417	92
362	RM14797	GGAGAGGGAACCAACAACAAACAACC	GCCTTGGAAGGGAGGAAAGAAGC	3	10.4231	98	3	11.3489	86	3	10.0477	95
363	RM14798	TGGCTTTGTTTCAGTTCGTTGC	ATGGTCACACAGAAAGAGCAAGC	3	10.4326	286	3	11.3583	282	3	10.057	282
364	RM14800	GTTTGACACGAAGTCGAGGAAGC	GTAGGACGACGTGGACGTAATGG	3	10.5689	261	3	11.5561	271	3	10.1904	253
365	RM14801	AACGACGCAGCAGAAGATAATCC	AGGCAATGAGGCAAGTGAGTAGG	3	10.5731	198	3	11.5603	198	3	10.1947	530
366	RM14803	CTCATTGCAACACAATGCAACC	TTTCGCCATGTCCAAAGTTAGC	3	10.6174	255	3	11.614	234	3	10.2387	255
367	RM14807	ACGAAAGCCTACTACCACCCATCC	AGAAGCTTCGAGGAAGCAGAGAACG	3	10.6679	85	3	11.6785	85	3	10.2857	85
368	AUT14808	CCTCCTTCGTAAGGGAACATATCC	TCAATTGCACCTCTCCTTGAAGC	3	10.6719	198	3	11.6824	200	3	10.2897	196
369	RM14810	GGAAAGGGAAACCACCAGATAAGC	AACAAGCACACACCCACCTCTCC	3	10.7022	141	3	11.7249	141	3	10.3199	138
370	AUT14811	CGTGGTACCAATTGTGTAGTTGACC	GGCACAAAGTTCTCCATTCATCC	3	10.7088	331	3	11.7315	344	3	10.3266	317
371	RM5178	CGTGGTACCAATTGTGTAGTTGACC	GGCACAAAGTTCTCCATTCATCC	3	10.7088	331	3	11.7315	344	3	10.3266	317
372	RM14812	GACTACGAGTACCGCGCCTACG	TGGATCAACTCGGAGCACTTGG	3	10.7131	337	3	11.7358	340	3	10.3306	337
373	RM14814	GAGAAAGGTGGAGCAAAGATTGG	TCCAGTCAAACAGGTTGAACAGC	3	10.7354	87	3	11.7553	84	3	10.3459	87
374	AUT14817	AGAGAAATGCCAGCTTTGACTGC	CCAGCTAGGATGTTGAAGGATCG	3	10.8263	143	3	11.857	123	3	10.4221	127
375	RGNMS1356a	CAAACAAAGAGATGTGTACTGG	GAGAAGGGAATAATAATGCAAA	3	10.8266	330	3	11.8573	310	3	10.4233	1260
376	RM14820	AGGTCGTCGATGTCCCTCTCC	AAACCATCGTGGCATCATCTCC	3	10.8709	189	3	11.9169	187	3	10.4676	153
377	RM14821	TTGGATAATCTACCCAGGGTTCTAGG	ACCCAATTTCATCTGCGATCC	3	10.8895	605	3	11.9466	647	3	10.4867	599
378	RM14822	GTCCTTCTTCGTCTACGCCATGC	CTTCCGCTCCTTGTTCTTCTTGC	3	10.8924	150	3	11.9495	150	3	10.4895	150
379	RM14823	CCTGAATGGTTGAATCCTCTCTCC	ATTGTACTGGCATTGGTGGAACG	3	10.896	252	3	11.9531	249	3	10.4931	254
380	RGNMS1239a	AAAGTTCATTTACAACCCAAAC	TGTAGTACAACAGCATAGCACC	3	10.8977	198	3	11.9548	218	3	10.4948	198
381	RM14824	AATAGTGGCTGATGTGGCAAAGG	GCTCAGGAAGTTGAAGCCCTACC	3	10.948	389	3	12.0231	395	3	10.5451	391
382	AUT14825	CGAATATTCAGGTTGGAGCAAACG	CGATTGGTCGCTCTAGCTTCTGG	3	10.9555	184	3	12.0314	196	3	10.5509	190
383	RM14826	CGGTGAGTGTTAGTTTCTCTTTGTGC	GTCCACGTACTGCTGCTTCTTTATGC	3	10.9569	189	3	12.0329	189	3	10.5523	189
384	AUT14827	CCACGGTCACCTATAAACGATTCC	GAGCACACCAACTACGCTACACG	3	11.0397	99	3	12.125	95	3	10.6268	95
385	RM14828	GGTCCTCCACGTCGTCTTCATTCC	TCGCTCGTAATCCATCTGCTTTACCC	3	11.057	90	3	12.142	90	3	10.6441	90
386	AUT14832	TCGCCGTAGGGCCAGTAGAAGC	CATCCACAACCTCCTGCAGTTCC	3	11.2353	149	3	12.356	143	3	10.8194	146
387	AUT14835	GCTCTCTCCCTACCTCCCTACC	AGCAGTTTATACGCTTGGATGG	3	11.3298	349	3	12.5197	348	3	10.913	323
388	AUT14836	GCTCTCTCCCTACCTCCCTACC	AGCAGTTTATACGCTTGGATGG	3	11.3298	349	3	12.5197	348	3	10.913	323
389	RM14837	TGGGTCTAGACTGGAGAGATGAGC	GAATTTGTGCCGGAAGTACATGG	3	11.3394	181	3	12.5296	169	3	10.9225	187
390	AUT14838	AATTTGCACAGAGGATGCAACG	CTGCGTCGTCACATTTAGTCTACTCC	3	11.3607	429	3	12.6058	367	3	10.9453	382
391	AUT14839	AATTTGCACAGAGGATGCAACG	CTGCGTCGTCACATTTAGTCTACTCC	3	11.3607	429	3	12.6058	367	3	10.9453	382
392	RM14840	TACTATATATGCGCCGTTGCTGTGC	CATGGTCCTTTCTTTCCAAGTCG	3	11.3788	193	3	12.6191	193	3	10.9588	193
393	RM14841	CATATACGCGTTTGTCACACTAGG	GGCGCTGTGTATATCAACTTTAGC	3	11.3814	141	3	12.6217	141	3	10.9621	141
394	RM14850	GGTCTAACATGAGCAAGCAAGC	CTACGCAACCATGTGCTATTGG	3	11.5533	124	3	12.8045	124	3	11.1319	120
395	RM14854	CTCGAAACCTGTGTAAAGGAATGC	GGCTAGCAATGGACAGAGAAACG	3	11.6357	165	3	12.9283	169	3	11.2222	167
396	AUT14855	ACCCAGCAACATCAACACATTCC	CCACGGAAACGGGTAGTAAACC	3	11.6695	175	3	12.9619	175	3	11.256	175
397	RM14859	AAGCAGGTCTTATTCAGCAACAGC	CAAGCCTGAAGCAGTAAATGTGC	3	11.7004	291	3	13.019	263	3	11.2872	271
398	RGNMS1216	TGAACTCCTATGTATGAAACGA	AAACTTGCGAGGTAAATAAATG	3	11.705	396	3	13.0235	396	3	11.2917	396
399	RM14860	GGAAGGTGATTTCATCCGGTAGC	TGGCATGTTTAATGCTGGTTCG	3	11.7051	294	3	13.0237	141	3	11.2919	606
400	RM14861	GGGTTTCAAACGGGCAAGTCC	CGCTTCGGATTGGGTTAAGAAGG	3	11.716	724	3	13.0344	703	3	11.304	694
401	RM14862	GGGTATTTGTAAGGTGAGGTGTCG	GTCTGGATTTCGGGTTTGAGG	3	11.7165	194	3	13.0349	160	3	11.3045	200
402	RM14870	CTCCATGGTGAGGTAGCAAGTGG	CTACCTCATGCTGGCCTTCTAGC	3	11.8925	181	3	13.2181	177	3	11.4644	181
403	RM14872	CAGTATACTCTAGCTGATGCATGG	GAGGAACCTAATCTGTCATACCC	3	11.9017	412	3	13.2274	337	3	11.4737	295
404	RM14873	CAGTATACTCTAGCTGATGCATGG	GAGGAACCTAATCTGTCATACCC	3	11.9017	412	3	13.2274	337	3	11.4737	295
405	RM14874	CAGTATACTCTAGCTGATGCATGG	GAGGAACCTAATCTGTCATACCC	3	11.9017	412	3	13.2274	337	3	11.4737	295
406	RM14884	TTTGACCAGCTGAGTTAACAGG	GTAGTATGGGACGAATGTTGAGG	3	12.0339	109	3	13.3686	91	3	11.6054	125
407	RM14885	CAGGTACACCGCCTGCTTCTGG	TGGCACCAGAATCACCTTCACG	3	12.0702	460	3	13.4069	454	3	11.6411	475
408	RM14889	ACCCACACATCAGTCTGTCAACC	GGGAGAGACAGCACCATGATACC	3	12.1499	257	3	13.4745	257	3	11.7112	257
409	RM14890	GAGAGCTCAGGAACCGAATGTGG	CATTTCCATCACGCTCCACTCG	3	12.2081	193	3	13.5642	185	3	11.7695	193
410	RM14891	TCATTAGTGCCCAACACGATCC	ACGGTAAAGTAATGTCGCCAACC	3	12.2791	173	3	13.6265	173	3	11.8284	173
411	RM14892	AGGATCTCCTGCCCGTTCTCC	GCGCGAGATCTCCAGAGTAAACG	3	12.3305	371	3	13.6808	371	3	11.8806	371
412	RM14893	CATGATTCAGAAGCACCAAACTGC	TGCCCAAGAACAAGAACTTAGCC	3	12.3356	171	3	13.6871	174	3	11.8861	174
413	RM14894	AAAGCGCCCATCAGAAACCCTAGC	GACAAACCCTTACAGGGCGAGAGG	3	12.3664	90	3	13.7276	90	3	11.9171	90
414	AUT14895	TATCCAAGCCTCCATACACATAGTGC	ACAAGAGGTGAAGAACTGGATGAGC	3	12.3785	111	3	13.7478	99	3	11.9292	102
415	RM14897	CCGTCTTGTCCTTCTTCTTCTTCG	TCTAGACCACTTTCGAGGATTTGG	3	12.4989	332	3	13.8813	332	3	12.0483	332
416	RM14898	ATGTTCAACCTTGTCCCGACTAACC	TAAAGACGGCAGCTATCACTTTGC	3	12.5129	165	3	13.8941	169	3	12.061	157
417	RM14899	GTACTCCTCGTTGTTCCTCTGC	CTCTGAAAGACGGAAATCAGC	3	12.5241	484	3	13.8684	484	3	12.0722	475
418	RM14900	CGTTCCCGATACGTGCCAAAGC	ATATCCGCTACGTCACGCCAACC	3	12.54	229	3	13.9514	212	3	12.0883	229
419	RM14902	GTTTGGGAGAGGCATGAGATCC	CCATCTCACAAACAGTGTTCAGAGC	3	12.5765	99	3	13.9889	99	3	12.1243	99
420	RM14906	AGAGAGACTGCACAGACACCATTGC	GTGAACTTCGCTAGAGCCACTCG	3	12.6405	163	3	14.0601	163	3	12.1896	161
421	RM14907	TCGAGAGGTAAAGGCAGATGTTTCG	CTCGATCGATCCGCTTCTGTGC	3	12.6411	282	3	14.0608	282	3	12.1902	282
422	RM14908	ACACTCTCCGCTCTCCACTCC	TGAGCTATCCGCCTACCCTACC	3	12.6793	499	3	14.126	523	3	12.2653	511
423	RM14916	AAGCACCCATGTGTAGAGCAACC	GGGCATCTTAAGAAACCGTATGC	3	12.7947	368	3	14.2619	413	3	12.376	524
424	RM14918	CTCGACATGCTGAGCTTTCTACC	GCTATTGCGCTTCACTGTCTCC	3	12.8578	203	3	14.3246	203	3	12.4318	246
425	RM14921	GAATAAGGGCACCTCTGTTCAGG	CAGGTTGGAATGGAGAGTGAAGG	3	12.908	218	3	14.4226	218	3	12.4826	215
426	AUT14930	CAATTAGATGGCTCCCATCATGC	CGTATATGCCTTCTTGGCCTATTCC	3	12.9541	362	3	14.4786	362	3	12.5229	381
427	AUT14933	TTCTTTCGAGGGTACGTAGAGG	CTAGCTAGCCAGTAGCTGATCG	3	12.9816	184	3	14.5049	181	3	12.5524	473
428	AUT14934	TAGTCCGGCCGTACATGAACACG	CTTGTGTGACGCGTGGAGAACG	3	12.9821	109	3	14.5054	121	3	12.5532	95
429	RGNMS1282a	TAAGGTGATTCTCTCCTCTCC	TGGTAGATACAGGGTCAACAAT	3	13.0186	405	3	14.5403	405	3	12.5918	405
430	RM14939	GGAGAGGAGAGAATCACCTTAGCC	TCTCGTCTCCTCTTCTCTCTTTGC	3	13.0186	398	3	14.5403	398	3	12.5918	398
431	RGNMS1307	TCTCCTCTTCTCTCTTTGCTC	GGAGAGGAGAGAATCACCTTA	3	13.019	393	3	14.5407	393	3	12.5922	393
432	AUT14940	ATTATACTGCCTCGGTTGAGTCC	GTCCTATCAAATTGGGTTCAGAGC	3	13.0245	366	3	14.5462	370	3	12.5977	386
433	AUT14941	ATTATACTGCCTCGGTTGAGTCC	GTCCTATCAAATTGGGTTCAGAGC	3	13.0245	366	3	14.5462	370	3	12.5977	386
434	AUT14942	ATTATACTGCCTCGGTTGAGTCC	GTCCTATCAAATTGGGTTCAGAGC	3	13.0245	366	3	14.5462	370	3	12.5977	386
435	RM14943	GAATGGAGGGAGTAACTGGTCTCG	AAAGGGTGTTTGGTTTGCTTGG	3	13.053	152	3	14.5746	152	3	12.6261	152
436	RM14944	CGGACCCATCGTTTATTTACGG	GACGAATCTCTTGAACCTAACTACGC	3	13.0543	388	3	14.576	386	3	12.6275	367
437	RM14950	CTCCGCTTCTCCATATGCCAACG	GCAACCTCCTCCTCTGCTTCTCG	3	13.1455	190	3	14.6933	190	3	12.7169	184
438	RM14953	CTCGTACCTTGTCGATCTTCTCG	ACTCCTCCGCTTTACTCCACTCC	3	13.1673	448	3	14.7161	448	3	12.7372	448
439	AUT14954	AGATCGAAAGCTTGGGTCAAACC	CCACAACACCTCGCTCTAAACC	3	13.1893	209	3	14.7381	209	3	12.7594	209
440	AUT14957	CTATCCGGAATTGGACCCAGACC	ACTGGCGGTCATGGAGATACAGC	3	13.3246	476	3	14.8988	476	3	12.8887	470
441	AUT14959	TGTCTAGGTTCGTAGCATGTGTTCC	CCACTGAAAGCACCGTTAAATCC	3	13.3344	232	3	14.9089	238	3	12.8985	225
442	RM14960	GTCAAGACCACCGCCTGGTTCC	CGACGAGGAGGTTATGGGTCTGG	3	13.3357	192	3	14.9101	195	3	12.8997	192
443	AUT14961	TGCACGTGATCTCTTGTAACCTAGC	GGAGAGGGCCTTGTTCTTGAGG	3	13.3413	297	3	14.9157	314	3	12.9052	312
444	AUT14963	TGCGTGTTAATGCTAGGCAAGG	CACCATGCAGGTAAGCATAAAGC	3	13.3589	296	3	14.9333	274	3	12.9228	274
445	RGNMS945	CTTGGAACTTGAAAGAGAAGAG	CGAACGTATGTTAGAACTCAGA	3	13.3608	372	3	14.9353	372	3	12.9248	372
446	RM14964	ACGACCTCTTCTGTGACGTGAGC	GAGAAGGCAGCATACGTAGATCTGG	3	13.3704	99	3	14.9515	99	3	12.9342	99
447	RM14966	CCTTTAAGAGTGGCAAACCATCG	CTCCCAACCACATGTCTCTCTGC	3	14.1517	395	3	15.0424	395	3	13.1126	392
448	AUT14967	TCCTATACTTGTCTGTCCATCGATCC	GTTCCTGCACAACAACAACAACC	3	14.1552	195	3	15.0458	209	3	13.116	191
449	RM14968	AGCAACTAATGCCGGTTCTTGG	CTCCACCTCCCTTGGTAACTCC	3	14.1811	119	3	15.0721	119	3	13.1409	121
450	RM14969	ACTACTCCTCGCCGTCGTCATCG	ACAGGTGCCTCGGCTTCTTGG	3	14.1823	197	3	15.0733	197	3	13.1421	185
451	RM14970	ATGTGCTGTGGAGGTCAAGTGG	CCTATCCTAGCTATCACCCGTTTCG	3	14.3464	428	3	15.2607	408	3	13.3393	561
452	RM14976	ATATGTGAGCAAGTGTCCAACC	TGCACGCTTATCTCTCAAACC	3	14.4087	331	3	15.3074	323	3	13.3825	329
453	AUT14977	CCGGGAAGCCCTTCATCTTAGC	GTTGGGTGGTGGCGGATATGG	3	14.4114	146	3	15.31	140	3	13.3852	146
454	RM14978	TATCTGCAGGTGCGTGTAAATGG	GCATATAGAGCGAGTAAGCGAGAGG	3	14.4327	225	3	15.3205	231	3	13.3936	225
455	RM14979	CGGTAAAGAGGGTGCTCACTGC	TTTGACTGTGGTTGGTTCACTGC	3	14.4348	191	3	15.3226	185	3	13.3957	191
456	RM14980	CCATGCTTGCAAGTTGTACTATCG	TCTATTGAGGCAAACCGTAGAAGG	3	14.435	382	3	15.3228	370	3	13.3959	406
457	RM14981	GGCGAGCAGAAGTATAATCCAGAAGG	CGCTTGTGGCTTACTGGCTTGG	3	14.4385	282	3	15.326	248	3	13.3994	246
458	RM14982	GAGGGTGGTCCAAAGACAAAGG	AGCTCGGTTCTCACTTTCAATCC	3	14.4395	538	3	15.327	538	3	13.4004	510
459	AUT14983	ACGGAGGCAAGGCAAATCTTCG	ATCGAGAGACGCACCCAATCTCC	3	14.4859	88	3	15.4252	79	3	13.448	88
460	RM14984	CAGCAACAATAGGAAGAAGCAACG	CCATCAGTAGAGTCATTGTGTTGAGG	3	14.4867	722	3	15.4261	699	3	13.4488	690
461	RM14985	AGTACATGAGGCTGGTGCTGAGG	CACCATTGACGCCACTCTTTCC	3	14.4996	172	3	15.4389	177	3	13.4617	172
462	RM14986	ACCTCGTCCTCACAGTCGTCACC	AGTACGGGAGCGACGTCCTTGG	3	14.5018	397	3	15.4411	393	3	13.4638	397
463	RM14987	CTTTGCCTAATGGTGGCTAATGG	CGTGTCTCTGATCCAACTTGTCC	3	14.5045	715	3	15.4438	685	3	13.4665	689
464	RM14989	CACCCAACTCTCACCTACTCTGC	GGGAGGAGATGGATACTGACTCG	3	14.5612	238	3	15.5054	238	3	13.517	238
465	RM14991	TGTCCTAGTCGCTAGTGCCATGC	TGGTTCCTCTAGCGCAACAATATGC	3	14.5808	289	3	15.5565	256	3	13.5328	355
466	RM14996	TCCGGAATATGAAGGTTCCTAGC	AGCAAACGATGGAGCTGTTACG	3	14.6391	388	3	15.6256	366	3	13.6089	392
467	RM14997	TCCGGAATATGAAGGTTCCTAGC	AGCAAACGATGGAGCTGTTACG	3	14.6391	388	3	15.6256	366	3	13.6089	392
468	RM15000	CAAGGGTTGCAGAGGCATGAGG	GACGGAGGTAGTACGTTGCAGAATGG	3	14.7026	260	3	15.6857	255	3	13.6716	264
469	RM15005	TAGCTAGCTCCGGCCACATCTCC	GGATCGAATCGGTCAGTTTGTGC	3	14.7589	75	3	15.744	66	3	13.7241	75
470	RM15006	AGCACGGACACTAGAGATTAATGG	CATGGAAGCAGTCAATCAAGC	3	14.7782	212	3	15.8126	203	3	13.7434	212
471	RM15007	CAACAGCTATCTGCTAGGTTCG	CTCATCAAGTCAGACAGAGTGG	3	14.7933	178	3	15.8311	194	3	13.7585	180
472	RM15008	CGAGGGAGAGAAAGTGAGCTTCC	CAAGATGTCCCGATCGTCAACC	3	14.7972	133	3	15.835	119	3	13.7624	127
473	RM15009	GTTACCATGTCCCGGCAGTAACC	TCACATGCTTCCTCTCAAACACC	3	14.8392	350	3	15.8751	354	3	13.7991	310
474	RM15012	TCCTCCTCTACACTGCTTTCCTTCC	CTCGCTTCTCCCTTGGGTAGC	3	14.867	177	3	15.9321	165	3	13.8268	171
475	RM15013	TGATGAACTCTTGCCTCTTTGACC	CAGGTAGAACGGGAACTTGTGC	3	14.8675	289	3	15.9326	290	3	13.8274	289
476	RM15015	CTTGTACGTGCCCGTGTGAGG	ACCACCTCCTACGTCGTCAATCC	3	14.876	131	3	15.9411	140	3	13.8358	131
477	RM15016	GCACATGTGTTCGTATGGGAGAGG	CGGGCTATCATAGAAGGGTTAATTGG	3	14.8924	405	3	15.9576	341	3	13.8506	819
478	RM15017	AAGAGGGTTGCCTAGCCAAAGG	CATGGCAGCATGAGAGAGTTGC	3	14.903	254	3	15.9932	251	3	13.8617	264
479	RM15020	CGGCAACTACTTCGAGCTCATCC	CAATTCACAGGCGTATTTGCTTGC	3	14.9382	423	3	16.0285	429	3	13.897	423
480	RM15021	AATCTACGCGGATCACCATGC	CAAGGCACAACCAAAGTTGAAGC	3	14.9415	148	3	16.0318	80	3	13.9003	102
481	RM15025	GTCAATTGGCTGGCTACTTACCG	GCACAATTGTTGGGATTTGACC	3	15.0246	540	3	16.1223	540	3	13.9681	524
482	AUT15027	AGAGGAGAGATACAGATTGAGACG	GACCCTTGATGTGAGTAGTTGG	3	15.0454	307	3	16.1509	328	3	13.9913	316
483	AUT15029	GATTCCTATGGAGGATTGTTGC	AACTCCACCGGTGTTAAGAAGG	3	15.0589	91	3	16.1763	110	3	14.0049	94
484	RM15030	GGAATGATTAGCTGCAATGTCACC	GCGTACGTGTGTACCATTAGTTGC	3	15.0745	257	3	16.1915	225	3	14.0208	227
485	RM15031	CTTCGAGCACAAGCACTAGATCG	CTCCAAATCCAAAGGACCAAACC	3	15.0955	178	3	16.2404	178	3	14.042	178
486	RM15036	CATATCCACCCTGCTGTGAAGG	GACTCCCTGACATGCCTCTGG	3	15.1376	422	3	16.274	416	3	14.0834	425
487	RM15038	GTTGCAAATTAAGGGAGGGAAGG	CGTACGCAAGTACAACGGTACAGC	3	15.1592	171	3	16.304	171	3	14.107	171
488	RM15040	CAAACAAATCGTGGATGGATGG	CGCACACACGCAAATATATAGTCC	3	15.2007	156	3	16.4253	154	3	14.1411	168
489	RM15041	CTGTTTACGAGCTCCTCTCCAAATCC	GACGGTGTAGTCGTTGCTGTCG	3	15.2218	195	3	16.4513	198	3	14.1627	195
490	RM15051	GAGGTGTTTCTTGCATGTCTCG	CAGAAGGAAAGAGGAAGAAGAAGG	3	15.3824	594	3	16.6066	632	3	14.3028	598
491	RM15052	GTAAGCCCTCGATCGCTCAATGC	GGACCAACGTCGCCAAGAAGG	3	15.3975	213	3	16.6218	213	3	14.3179	211
492	AUT15053	TTTCTGGCGACGTGATTTGTCG	CAATTCGGAAGAGCAAACATGACC	3	15.4128	96	3	16.6417	86	3	14.3327	96
493	RM15059	GAGCTGGAGAGGATCAGAGTGC	TAGTGTAATGCTGCTGCTTCTGC	3	15.4878	379	3	16.7313	1021	3	14.4066	377
494	AUT15062	GCATTTGCTTGTACCTTCTGTTGG	AACCACACACATCCACGAGTCC	3	15.5332	380	3	16.7736	512	3	14.4455	755
495	AUT15063	CTTACACACATGGCCCACATGC	TCCTCTCTTCTCACTCTCCCAACC	3	15.5437	194	3	16.7837	180	3	14.4566	180
496	RM15064	AACGTAACACAGCTGAGCAGCTACC	ATCTCCTGCAGCCTCCACACC	3	15.5619	242	3	16.8019	239	3	14.4784	239
497	RM15068	GGCCATGTGTTGTTTCAGTGG	TGTAGCTGCGATCTACTTCACTCTCC	3	15.7029	383	3	16.9312	381	3	14.6238	377
498	RM15069	ACATTCCTACTGGAAGCAAAGG	TATGTGTACAGCCCGAAACTAGC	3	15.7053	86	3	16.9336	86	3	14.6262	86
499	RM15142	CGTGTCCACCAATAGAAACACAGG	CCGCGTGAGGAGAGTAAAGAGG	3	15.9113	279	3	17.0579	273	3	14.7113	285
500	RM15077	TGTTGATTTGTCGGTCGAAAGC	GGCAAATCTACAGTCACAGACAACC	3	15.9353	199	3	17.1223	151	3	14.8313	200
501	RM15079	AGCAGGACACAAAGAAAGGAACG	CTTGGCATGATGCTATCCAGTCC	3	15.9427	193	3	17.1362	183	3	14.8388	215
502	RM15082	GGCTCTCTGTAGGATGGAGAAGC	GAGCTCTGAATGATGCTGACTGC	3	15.9621	186	3	17.158	207	3	14.8587	186
503	RM15087	CACCTCGTTCCTACGTCATATTGC	GGCGGCATAGTAGCGTTTATAGG	3	15.9968	177	3	17.174	169	3	14.8942	172
504	RM15088	CAGCACCTGCACCGTATTCTTCTCC	GCGGTTACGAGGTTGTCCTTCG	3	16.0328	213	3	17.2319	213	3	14.9301	213
505	RM15089	GGACGAAGGACAACCTCGTAACC	ATCTATCAGCCCACCACACACG	3	16.033	176	3	17.2321	170	3	14.9303	170
506	RM15090	TTTCCGTCTTCTAGATCGATAGCC	GATCAGAGCAAACACGATGAGC	3	16.0606	111	3	17.26	107	3	14.9587	111
507	RM15091	TGTAAGCAAAGGAGGCAAGATGC	TGTCTCGCTATCTGATGAAGTTCG	3	16.063	369	3	17.2624	333	3	14.961	347
508	RM15093	CTCTGGAGCCCACTTGTCATACC	AGCTTGTGCAAGCGTGTGTACG	3	16.0748	199	3	17.2742	199	3	14.9727	195
509	RM15097	GTCGCCGTTTAACAAGGCTACGG	GTTCGGAGGCCATTTGATTCG	3	16.0791	212	3	17.2781	212	3	14.9767	212
510	RM15098	CCATTTCTTTCTCTCGAGTCTTGG	CTTCCATCATCATCGACAACG	3	16.084	381	3	17.283	381	3	14.9816	378
511	RM15104	AATGGAGCACTGTAGGTCTGTAGC	CTCACATGTCGAGCTCTATTGC	3	16.1614	144	3	17.3684	151	3	15.048	138
512	RM15105	CAGCTATGCGAAGCAAACAGTCC	TCACATACCGAAGCATCACAACC	3	16.1651	478	3	17.3722	475	3	15.0518	473
513	RM15106	GAACGGAGCAAACATCTCACAGC	CTCTTCGCCGTCAAGTTCATCG	3	16.1829	149	3	17.3902	154	3	15.0701	149
514	RM15109	ATCGCTCGATTCCTTTCCATCC	CTGCAGTTCAAGGCGGTAGTACG	3	16.2129	182	3	17.4182	168	3	15.1054	182
515	RM15110	CCACGTCTCCACCTCTTCTCC	AAGAAGAGCGCGATGACAACC	3	16.2191	284	3	17.4259	254	3	15.1113	277
516	RM15111	CCAAAGCCGAAGGAATTGAAGG	GGAGTGATGAGTCGGAGGAAGG	3	16.24	223	3	17.4523	209	3	15.1368	221
517	RM15115	GTACGAAGATAGCCGTTGGTTGG	AGAGTTTCGGTATCACGGTTTGC	3	16.2509	222	3	17.4634	231	3	15.1476	242
518	RM15117	CCAGAGTCCCAGCAGACTAGACC	TTGTCCATCTCGATGCCTTTACG	3	16.2547	249	3	17.4672	248	3	15.1514	249
519	RM15120	GCATATGCATGTAGGTGTAGGC	ACAAAGCTCGTAGGACTGTATAGC	3	16.2598	133	3	17.4724	133	3	15.1565	133
520	RM15121	ATCTAGCTTGCATTCCGAGTGG	GAATGTGCTGTACGATCTGAACC	3	16.2655	398	3	17.478	404	3	15.1624	420
521	RM15123	AACCGTTGAGCAGATCACATCG	CCGTGAACAACCAGAAGATAATGC	3	16.3151	388	3	17.5223	388	3	15.2106	358
522	RM15135	TGGTTTATACACACAGGGCATAGGG	CAAACGGTCATGCAAAGTTCTACG	3	16.4155	373	3	17.6179	371	3	15.3539	365
523	RM15136	CGAGTTCAGTCTTGGAACCATCC	TGAGCAGTGGAAGACAGTTAGGG	3	16.4196	195	3	17.6219	201	3	15.358	193
524	RM15137	CATGCAGGCCTCTTAACTCACC	GAGGGAAGGAAGAGGAGGAGAGG	3	16.4337	473	3	17.637	479	3	15.3721	469
525	RM15140	TCACAGGGAAGACCTCTCATTGC	ACGACGATAGCAGGTGTCTCTGC	3	16.4527	75	3	17.6477	75	3	15.3894	75
526	RM15141	CAGCAGCAGAGACACCTGCTATCG	CTACAAGCAGCCTCCTGCCAACC	3	16.4528	264	3	17.6478	255	3	15.3894	264
527	RM15149	AAGCATCGACGTAGAGGATGTCG	CTCCAACTCTTGCGAAACATGC	3	16.5392	266	3	17.7386	258	3	15.4162	258
528	RM15152	TTTGTAGGGTTTCGGCATCTCC	ATAGGAATCTTACGCCGGAATCG	3	16.5903	175	3	17.7935	175	3	15.4571	175
529	RM15154	GTACGGACCGGAAAGCGGAAGC	TCCTCGACGAATCGGAGAATTGG	3	16.6121	162	3	17.8178	162	3	15.4786	159
530	RM15155	CATTGCGGTAATGCTTCTCTGC	TTCAAGGCCTCTTCTACCAAGTACC	3	16.6296	283	3	17.8352	268	3	15.4961	275
531	RM15157	TCAGTGAAATGAAAGGGAGGAGACC	TTTGCAGTATCTGGACTGCAGAGG	3	16.6778	301	3	17.8863	301	3	15.5438	301
532	RGNMS1090	AGAATCAATTGTGCGAGTAAA	TGAGTTGAGTTGAGGTGAATTA	3	16.6865	359	3	17.9043	355	3	15.5497	358
533	RM15158	TCGGCACTCACACCACTATATCC	GTGGTGAAGGATTTGGAATTGG	3	16.6867	193	3	17.9045	189	3	15.5499	193
534	RM13393	CCTCCTCTATGGACGATACAAACG	GCTTTCCTTCCGCAACAGTAGG	3	16.6953	277	3	17.9132	256	3	15.5582	240
535	RM15160	CCTCCTCTATGGACGATACAAACG	GCTTTCCTTCCGCAACAGTAGG	3	16.6953	277	3	17.9132	256	3	15.5582	240
536	RM15163	TGCAACTCGATGACAAGTTGAGG	CAACAGCTATGAACACCACAAGAGG	3	16.7157	670	3	17.9339	662	3	15.5797	681
537	RGNMS1221a	GTTGATTGGGAATAAGAAGAGA	ACAGAGGAGAGGAGTAGTAGCA	3	16.7162	400	3	17.9343	392	3	15.5802	411
538	RM15164	CGGAGGGAGTAGATTACAAGTCACG	ACCTTCTCTCCTTTCGCTCTTCC	3	16.7182	173	3	17.9436	155	3	15.5822	161
539	RM15165	GCGGTAAGCACGCTTTAAATACC	GGAAAGCTAATGTGATGGTGTGC	3	16.7211	235	3	17.9464	247	3	15.585	237
540	RM15166	CATTAGCTTTCCCTTTCGACTGC	TCTTCCTTCCTCCTCTTCTTCACC	3	16.7213	73	3	17.9466	73	3	15.5853	73
541	RM15170	TCCCTTTCTCTGTCTCGGATCG	GAGAGAAATTGAGGAGGAGAGATTCC	3	16.7296	87	3	17.9549	87	3	15.5936	87
542	RM15176	GTGCTTTGAACTTTGAGGTCATGG	GGGCATCTTAATTGGCAACTCTATCC	3	16.872	505	3	18.1322	534	3	15.7301	517
543	RM15177	TCCTGTGTTGGACGGAGTATGC	GCCTCAGAGGTTAGAAGACAGACAGC	3	17.0433	150	3	18.2939	163	3	15.8873	142
544	RM15178	CATGAACTTATCTTGCCTGTGC	AACTAGGTCCAAATGGCTTGG	3	17.0844	681	3	18.3399	592	3	15.9285	571
545	RM15184	GCTCGCCAAGATCCTCAAGAAGTACG	CTGGATGAGCCAGTCGGAGTCG	3	17.2817	336	3	18.5337	336	3	16.1098	336
546	RM15185	CTCCACCTACGGCCACTTCTCC	GCATTTGCCGTGAGATGACTACG	3	17.282	141	3	18.5339	141	3	16.11	141
547	RM15186	AGCCTCCTAGAACGGCAAAGG	CTATGTTTCGTGCAACCAAGTCC	3	17.3276	154	3	18.5911	168	3	16.1571	129
548	RM15187	AGCCTCCTAGAACGGCAAAGG	CTATGTTTCGTGCAACCAAGTCC	3	17.3276	154	3	18.5911	168	3	16.1571	129
549	RM15188	AGCCTCCTAGAACGGCAAAGG	CTATGTTTCGTGCAACCAAGTCC	3	17.3276	154	3	18.5911	168	3	16.1571	129
550	RM15189	GGTATCTCCCAGACACACATAGTGG	GATTGTCTCCATATCTCAGCATCC	3	17.3353	374	3	18.5988	362	3	16.1648	368
551	RM15191	CCTACCTGTCATTCCGTCAATCC	AAGCTGGAGCTGTGGACTACTGG	3	17.3839	197	3	18.7199	191	3	16.2127	193
552	RM15192	ACCAACCGATAGTAAGGACATGG	GGACGGAAGAGTCGAGTAGTAGTAGG	3	17.3901	82	3	18.7254	82	3	16.2185	82
553	RGNMS1299	AGAAGAGAGGAGACGTCACGG	GCTTACCTACCAACCGATAGT	3	17.3902	109	3	18.7255	109	3	16.2186	109
554	RGNMS1408	CATATCATGTTTGTTCGTTTGT	GAAGTCTGAAGAAGAAGTGGAG	3	17.4754	358	3	18.8098	358	3	16.3037	358
555	RGNMS1397	ATACGGTACTTTCATCTCTGCT	ACCACAATTTACAGAGGGTAAC	3	17.4767	221	3	18.8111	221	3	16.305	224
556	RM15197	AGCTCTTCTTGGGCCTGAACG	TGTGCTCCTACATGTATTGACTGTGG	3	17.4985	94	3	18.8327	94	3	16.3596	94
557	AUT15198	GTAAAGTACGTACGCGGATGTGG	GAGATACATGAGCAGAGGCAGAGG	3	17.4989	233	3	18.833	233	3	16.3599	233
558	AUT15200	CGACTGATTCGATTCCACAATGATCC	GCAGCTGGAAGCAGAGGAAGACG	3	17.5156	184	3	18.8498	184	3	16.3768	193
559	RM15201	CGGAGTTTGGCTGATTTAGAACG	TTGATAGGACTGCTTTGCTCTGC	3	17.5189	181	3	18.853	179	3	16.38	179
560	RGNMS1150	AGTGATTGATTTGCATACTTGA	CTAGAGTTTAGCATCGGAGTTT	3	17.519	213	3	18.8532	211	3	16.3802	211
561	RM15202	GATCGATCGCCTACAAACAATGC	AGACGTGTCTCCTGCTCTCTGC	3	17.5196	99	3	18.8537	99	3	16.3807	99
562	RM15203	ATGGTGAGACGACAGAACAGATGC	GACGCGCTTTGTGTTTCTTGG	3	17.557	477	3	18.8911	447	3	16.4178	420
563	RGNMS1141a	CTTGAGTTCTTTGATTCTTTCC	ACTTGACGAATCTTTATTTGCT	3	17.5575	264	3	18.8916	234	3	16.4182	207
564	RM15206	CATTTCTTTGCCCTCGATCTTTCC	AAGCGCCATAATCCAGGAACC	3	17.6013	193	3	18.9449	193	3	16.4589	191
565	AUT15207	GATCAGGTGGTCGGTTCCTTACC	CCTGTTGGAGACTGAGCTGATGC	3	17.606	99	3	18.9496	99	3	16.4636	99
566	RM15208	CCGGTGGAGGTTGGGTATTCATAGG	ATGGCCACTATCCGTCCGAATCC	3	17.6395	492	3	18.9825	492	3	16.4856	484
567	RM15209	ACGAGAAGAACAACACGGTGACG	TTCTTGATCATCTCCGGCTTTCC	3	17.6842	237	3	19.0483	237	3	16.5283	234
568	AUT15215	GGGTGCACCTTTGTATCTGTGC	TGACAGAGGTAAAGCAGCAGTAGTCG	3	17.9022	231	3	19.2793	245	3	16.7354	227
569	AUT15217	AAGAACCCACCTGCGGTTAGC	CTACAGCTTTCTTGATTCGCTTGG	3	17.9284	169	3	19.314	187	3	16.7623	157
570	RM15218	CATGGATTAGCTCCCTCAATTAGC	GCATATTCACCCTCCCTCTACG	3	17.9307	220	3	19.3163	159	3	16.7646	221
571	AUT15224	TCTCGTTCATCTCCGATTCTTGG	TGGCAGCAGCAGTACTTTCTAAACG	3	18.0584	491	3	19.5331	477	3	16.8909	470
572	RM15225	CTCCCTCCACCAAGTCGTCATGC	CGAGCGAGAGGAAAGCCTGAGC	3	18.0926	275	3	19.5726	284	3	16.925	275
573	RM15226	CCCTACACTACGCTCACAAACAAACG	TAGAGCGCCGATATCCCGAAGC	3	18.0946	196	3	19.5745	178	3	16.927	180
574	RM15228	GGAATCTCTCTCACCCAGTCACC	CTTCCGCGCGATCTAATCTCC	3	18.1486	183	3	19.6261	186	3	16.9698	183
575	RM15229	GGAATCTCTCTCACCCAGTCACC	CTTCCGCGCGATCTAATCTCC	3	18.1486	183	3	19.6261	186	3	16.9698	183
576	RM15230	AGAACAAGAAGCTAGGGCAAACG	CATCCATCCTAGTGACCACATCC	3	18.1576	194	3	19.6352	201	3	16.9787	227
577	AUT15235	CCAGCATGGCACGAAATTCAGG	GGCATGGCCCAATAAGGATCAGG	3	18.3314	240	3	19.8364	246	3	17.1438	355
578	RM156	gccgcaccctcactccctcctc	tcttgccggagcgcttgaggtg	3	18.3509	158	3	19.8547	148	3	17.1632	158
579	RM15236	CACTCCCTCCTCTCTCCTCTCC	GTTGGTTGGTCGGTTGCTTACC	3	18.3509	169	3	19.8547	159	3	17.1632	169
580	RM15237	CTCGACGACGAATCATGTAAAGC	TTGTGGAGATGATCATGCAGAGG	3	18.3815	185	3	19.8793	185	3	17.1875	191
581	RGNMS1123	TAGATCCGTCACTGATGACTTA	AGGCTGTTTCTAGCTAGTTCTG	3	18.3823	921	3	19.8802	921	3	17.1884	927
582	RM15238	AAACCGTCGTACATGCTTAGCC	AAGAACCCACTAAACTTGGGATGG	3	18.4064	570	3	19.9009	515	3	17.2102	528
583	RM15239	CTCGGCATTTATAGTTCTCCAACC	CTTTCCTCCTTGTTTCTCATGTGC	3	18.4065	643	3	19.901	589	3	17.2103	601
584	RM15240	TTCGTACTCCCATAAAGCTAGAGAGC	AGCAGAATCCGGCACTTTATCC	3	18.413	333	3	19.9074	307	3	17.2168	305
585	RM15241	TTCGTACTCCCATAAAGCTAGAGAGC	AGCAGAATCCGGCACTTTATCC	3	18.413	333	3	19.9074	307	3	17.2168	305
586	RM15242	GACGACGACGACAGGAGATCG	CGGATATGGGTTAAGGGAGAATCC	3	18.4245	134	3	19.9189	134	3	17.2283	134
587	RM15243	AAGATTGAAGAAGCGGTCAAGC	GCTTGCATGCATAGATTTCTCC	3	18.425	192	3	19.9194	189	3	17.2287	180
588	RM15244	CAATTGTTGCACTCGATCTCTCC	TAAGCATCATTGCCTGTGACTCG	3	18.4327	99	3	19.9353	99	3	17.2367	99
589	RM15245	AGGATTTACACGCGCTTTGAGC	CATCAACGGCAGTAGAAGGTTTCC	3	18.4649	198	3	19.9695	192	3	17.2683	198
590	RM15253	AGATGGAGGAGGCGGTAGACG	GTCATTATCAGCTCCGCTCTCG	3	18.6628	250	3	20.1972	250	3	17.4659	250
591	RM15254	GCACTCAGTCTCAGCTAGCTTTCAGC	AGGGCGGTCGGTTACTTGACG	3	18.7961	148	3	20.464	148	3	17.5794	148
592	RM15256	TTCTTCTTTCTCCTCCTCCCTTCC	CGATCTGTCAGACGAGGAGTTGC	3	18.8407	312	3	20.5073	308	3	17.6225	312
593	RM15257	CCCAACTGACGTCCTCTATCTTCC	GCTAGTTACATTTGGGAGGGTTGG	3	18.8707	170	3	20.5461	168	3	17.6541	164
594	RM15263	AGGGATCTTGGGCCGAAAGTGG	CTCCGTGATGGGCTTACATCTTGG	3	18.9828	390	3	20.7371	390	3	17.7425	390
595	RM15264	GAGCCCAATAACAATGAGACATCAGC	TCCGGACTGATCAATGAGGAATAAGG	3	18.9938	467	3	20.748	464	3	17.7534	487
596	AUT15265	ATTCTGACGCACCAGTACCCTACG	CACATCGAGGATCTGATTGAACTGG	3	19.0436	135	3	20.8142	141	3	17.8089	135
597	RM15269	GGCATCTTTAGTTGGTCCAAAGC	ACAACCATTCCGTTCAGTGTGC	3	19.1232	218	3	20.9073	197	3	17.889	252
598	AUT15279	TTAGATCACGATACTCAGGGATGC	CGAAGAAAGAGAGCACGAAACG	3	19.2679	257	3	21.0798	249	3	18.0078	248
599	AUT15282	AAAGGAGGGAGGAGGCAGTAGC	GGAACATCTTCTCCGGTTCTCC	3	19.3186	171	3	21.1517	171	3	18.0373	171
600	RM15285	TCAGTTGAAGGTGGATGGATCG	ACATGACGCACAACAGATTTGG	3	19.362	199	3	21.1863	203	3	18.095	211
601	RM15286	AAGGTTCTTTGAGGCTTCGATCC	GGCTTTGAAGCCAAATCACAGC	3	19.4052	271	3	21.2314	271	3	18.1134	271
602	AUT15295	GGAGGGCGTACATGTCAATAAGG	CCAGACCGGGACTTCTCATAGG	3	20.1549	185	3	21.9931	180	3	18.5501	165
603	RM15296	GAGAGTAGTGGTGGTTATCGTTCTGC	TAGCTATAAATGCCCGTGCTTGC	3	20.1562	377	3	21.9944	379	3	18.5514	373
604	RM15315	CTCGACCAAACAGACCAGTAGGG	ATCGCCGCTTAGGAGAATCTGG	3	20.403	107	3	22.7236	107	3	18.8964	91
605	RGNMS1247	TCTAAACATGTGTTTGCACTTT	TATTGAACACAACTAACGGGTA	3	20.9536	379	3	22.7403	379	3	18.9764	380
606	AUT15312	GAGATGTTGCATCACACTCTTGC	GTGCATAGCAGGGAAATGTTGG	3	21.0055	365	3	22.792	328	3	19.0676	328
607	RM15315	CTCGACCAAACAGACCAGTAGGG	ATCGCCGCTTAGGAGAATCTGG	3	21.1632	107	3	22.9236	107	3	19.1964	91
608	RGNMS1246	TGACCAGTGATAACATTTCAAC	GAGTGCAATTCTGTGCTAGTAA	3	21.3383	306	3	23.1177	313	3	19.3567	306
609	RGNMS950	AATATCGAACTTTGCAAGAAAT	ATCCACAACCAAGAAACTTAAA	3	21.5068	161	3	23.3231	161	3	19.5187	161
610	RGNMS1257	CAATTGTAGTGTGAAATGATACG	TAATGACAGCCAACGTTAAATA	3	21.5355	245	3	23.366	244	3	19.5466	244
611	RGNMS1184	AATATATGGTCCACCTGTCACT	CTGCATCCACTTTACTGTATTG	3	21.541	360	3	23.3714	330	3	19.5521	330
612	RM15326	TGAATCTACCGCTCTACTTGTGG	AAACAGTGCATCCTTCTTGTGG	3	21.5622	248	3	23.3944	225	3	19.5734	202
613	RM15327	CTGTGTGTAGTGGCATGTTACC	AACATTCCCACCTCTATCTAGC	3	21.5635	377	3	23.3957	367	3	19.5746	362
614	RGNMS1232	TAGGCCGATTAGTTGCTATTAT	AGACGTTGGTTCCAATATTTAC	3	21.6066	157	3	23.4786	147	3	19.6161	157
615	RGNMS1273	GGCATCTCTGATTGAAGAGTAT	TGCATTATAAACCATTAATCCC	3	21.6446	326	3	23.518	326	3	19.6436	326
616	RM15330	CAGCTTGTGCCATCATCTCAAACG	CTTCAGCCCACCCAGAAATGC	3	21.6771	136	3	23.6239	136	3	19.6908	136
617	RM15332	GTACAGTATTCCCACGCACTGG	TCAGTCTGCCAAATTGATCAGC	3	21.7446	349	3	23.7109	285	3	19.7503	267
618	RM15333	AGAGACTGTGGCCCAATATTCC	GCCAGAGTATCATTCAAACACACC	3	21.7475	397	3	23.7137	378	3	19.7531	373
619	RM15337	CTTTCGGGAGATGGTGTTTGC	CTCCTTCCATTCCCTTCCATAGG	3	21.7944	496	3	23.7635	452	3	19.7917	463
620	AUT15341	CTTCAATAACCGTTTGCCTCACC	CCTTTCCAAACATACCCTACATCG	3	21.9105	328	3	23.9782	328	3	19.9091	328
621	RM15348	CGGCGTAAGTGGTGAGTAGTGC	CCCATTCTTGGTTTCTCACTAAGC	3	21.9743	357	3	24.0448	327	3	19.9712	367
622	RGNMS1095	TAAGTGGTGAGTAGTGCATGTC	AAGGTTCATCCTCTGATCTATG	3	21.9743	206	3	24.0448	176	3	19.9712	216
623	RM15350	GCCACATCATCGCTAATCCATCC	AATCCGCTGCTACGGACTTGC	3	22.1242	152	3	24.2055	152	3	20.1102	152
624	RM15351	AGTCAGAGACTGGTGTGGACTGC	GAGCTCAACACAAGAACCAAACC	3	22.1257	165	3	24.207	149	3	20.1117	143
625	RM15352	AGTCAGAGACTGGTGTGGACTGC	GAGCTCAACACAAGAACCAAACC	3	22.1257	165	3	24.207	149	3	20.1117	143
626	RGNMS1407	GGCTTTCTTTCAAGTAATTGTC	GTTCTGGAAACATACCTTGTCT	3	22.153	266	3	24.2283	238	3	20.1332	264
627	AUT15353	GGGTCAGCTGCACACATAGAACC	TCTTCAGCTCTCCCTCTCCTTCC	3	22.1531	143	3	24.2283	115	3	20.1333	141
628	AUT15355	GTAGGAAATTCTTCGCCAGATGC	CCGAGACTTGGAACAATCTTAGGC	3	22.1909	167	3	24.2529	158	3	20.1652	164
629	RM15361	CTCGACACAAAGATCAGCAATGG	CTCAACCTCATCATCGCTTGC	3	22.376	177	3	24.513	192	3	20.3442	201
630	RM15362	CTCGACACAAAGATCAGCAATGG	CTCAACCTCATCATCGCTTGC	3	22.376	177	3	24.513	192	3	20.3442	201
631	RM15363	TATGCAACGAAGCGAAGTTCAGG	TCTGCTGCTGGATCTCTTGTCC	3	22.4972	153	3	24.6992	153	3	20.4852	153
632	RM15364	CGTTTCACACTTCTCCGCTCTCG	GCCATCAGGATCGACTCCAACG	3	22.517	170	3	24.7275	173	3	20.5045	173
633	AUT15365	GGAGAATAGAGCAGCACGTTATTGC	TAGCTCATGTGTGCAAGTTGTGG	3	22.5449	356	3	24.759	362	3	20.5505	357
634	RM15367	ACACTTGCAGCAATGGAAATGG	GGCCTGTTGAGCTAGGACTTGG	3	22.6842	91	3	25.049	91	3	20.6832	91
635	RM15370	TGGTGAGGAGCTTCAGTATGATCC	CCATGCTATGTCGAAGGATTGG	3	22.7113	192	3	25.0674	192	3	20.7088	192
636	RM15379	CCAAGAAAGCACAACAGAAGAGATGC	TTCACAGTGGAAATTCGCTTGG	3	22.8109	393	3	25.2132	368	3	20.8153	506
637	RM15380	ACCGTGTCTTTGCTAGGCAAGTTTGG	GAAGTGCACCACCTGCCTTGG	3	22.8346	99	3	25.241	97	3	20.8363	101
638	RM15382	GGACAACGAGATAAACGAAAGG	GTCAAGAAGTTCGACAGGATCG	3	22.9284	98	3	25.4872	100	3	20.9306	110
639	RM15385	GACAGATGTCCTCACAAACACACC	GTCACATTAAGCCTCCTGCTTGG	3	22.9723	171	3	25.5498	169	3	20.963	167
640	RM15386	GCTTGTCTTGGCGTGTGTTAGC	CTCGGCAGGACCCACTATGTACC	3	23.0095	274	3	25.587	274	3	21.0004	274
641	AUT15388	GTTGTAGTGCGGGCAGTTCTCC	CGTACTGTTTGCCTCTGCTTGC	3	23.019	137	3	25.6037	133	3	21.0096	137
642	RM15389	CACACGCAAATCCGGAATAACC	GCGGCGATCCTAGAGAGAAGG	3	23.0418	199	3	25.6323	202	3	21.0324	211
643	RM15390	ATCATCAGCCGATCGATTCACC	GGGAAGGGCAAGAAGAAGAAGC	3	23.0524	296	3	25.6429	281	3	21.043	296
644	AUT15393	AGGGAGTAACTAACAAGGTCACAAGG	GCATAAATTCAGCTCCGTACAAGG	3	23.153	193	3	25.7565	190	3	21.1447	193
645	AUT15394	TGTAAATGCCTGAGTGCCTACCC	AGCTAAACCGCTAGGGCCTTCC	3	23.1626	175	3	25.766	153	3	21.1543	199
646	AUT15395	TGTAAATGCCTGAGTGCCTACCC	AGCTAAACCGCTAGGGCCTTCC	3	23.1626	175	3	25.766	153	3	21.1543	199
647	RM15399	AGGCTCAGGCGTAGTCTGTATCG	ACAGGGATGCCATAGTTGCTAGG	3	23.2143	174	3	25.8384	175	3	21.206	320
648	RM15403	TTTGGCAAGGCTATCTTCTCTGG	GGAGAGCCGAAACTATTTGATTGG	3	23.2516	160	3	25.8978	118	3	21.2503	249
649	RM15404	TTTGGCAAGGCTATCTTCTCTGG	GGAGAGCCGAAACTATTTGATTGG	3	23.2516	160	3	25.8978	118	3	21.2503	249
650	RM15412	GGAGTATGAAACATCGGATTGG	TTTACTCATGCCTCTTCTCTGC	3	23.2909	94	3	25.9307	94	3	21.2816	94
651	RM15417	GAACTGTATGACGTCGCACTCG	CCCTAAACCCTAGATTTCCATCC	3	23.3637	492	3	26.0172	501	3	21.3538	492
652	RM15420	GATCTGGAGGGCGAACCTTGC	TTTCGATCACATCGGCAGAAACG	3	23.4357	282	3	26.1361	282	3	21.5486	282
653	RM15422	CAGCCCATATATTTGTCGTGAACC	CTAATGTCCCAAGATCGTGTTGC	3	23.4435	277	3	26.1439	258	3	21.5563	255
654	RM15427	GTCGGAGTAGGCGGAGAACAGG	GAGAAGATGGCTTGAGATAGCATTGG	3	23.5866	314	3	26.3022	314	3	21.6801	296
655	RM15440	GTGGTGGAAACAGAGAGTTTGG	CACCTTTCCCTTCCTCTCACC	3	23.7989	107	3	26.6535	99	3	21.8298	99
656	RM15441	CAGCTCCCGTCAACCACACTCC	GCGAGAGGACAAAGAACTTTCAGTGG	3	23.8365	362	3	26.7015	331	3	21.8592	857
657	RM15446	GGGTTTGTTGACATACATAGGCTTGC	GTGTAACAGGTGATCGACATTGAGG	3	23.8857	470	3	26.743	474	3	21.904	531
658	RM15447	TATTTCTTCCATCCTCCCGTTGC	CCTTGCTGCTTGCTACTCAGATCC	3	23.887	104	3	26.7443	102	3	21.9054	88
659	AUT15448	GTGCGCCAGGAGTAGTTGTCTCC	GACGTGTACACATAGCCAAATCATCC	3	23.8878	147	3	26.7451	163	3	21.9061	147
660	RM15449	AGACTAATGGGTTTCTGTCAGC	TTTATTCGGCTCTCACTCTGG	3	23.8906	469	3	26.7479	463	3	21.9089	465
661	RM15450	AATGGGTGCAGTTAACCAAACG	TGATGGTCAAAGGATCATCAGG	3	23.8934	171	3	26.7506	217	3	21.9117	179
662	RM15451	AGCCTAGGATGCCACTAAAGAAACC	CCGGTAACAACCTCAACACTTCC	3	23.914	289	3	26.7714	289	3	21.9326	454
663	RM15453	CTTAGCTCCAGCTGGCATGTTGC	ATACGCCTTGCAATCTCTCGATCC	3	24.0393	175	3	26.9366	175	3	22.0458	173
664	RM15454	AGCGTTCGAATTGCAGAAGTGG	GAGGCTAACAGAGGATGGGAAGG	3	24.0948	626	3	26.9938	610	3	22.088	636
665	RM15455	GGAAACCGGTCTAACTTGTAGTGC	ACGCAACAAACAGAGAGAAGTGG	3	24.097	174	3	26.996	174	3	22.0902	174
666	RM15456	AAGTAGGCGATGGCCAGGTACG	GGATCCTCGAGGTGAATGATCG	3	24.1722	162	3	27.1027	159	3	22.171	159
667	AUT15457	GGCCATCAAACTGGAAAGAAATGC	AGCCTTGACCAGACCAGAGTTGG	3	24.174	304	3	27.1044	301	3	22.1727	294
668	RM15459	CTCGGTGTAGAGATTGGCTTCC	TTCCTTAGCAGTTTGCTTACCG	3	24.1998	260	3	27.1369	633	3	22.1989	250
669	RM15463	GTCTCTTAATGGAGACCACAACTAGG	AGAGAGGATGAGGGAGAGAGTGG	3	24.2366	320	3	27.1963	320	3	22.2345	316
670	RGNMS1165	TAAGTTTCCTTCATCGAGTTCT	CCATTACAGTACCAGAGCATAA	3	24.2686	159	3	27.1934	159	3	22.2638	171
671	RM15465	AAGTTCTTGTTTCCCTTCCCATCC	ATCATCTTAGCAAGTCCAAGCACAGG	3	24.2686	179	3	27.1934	179	3	22.2638	191
672	RGNMS1113	CTTCTTGAATGAGTATTCCGTT	AAACATCAGCAATAAGAACAAA	3	24.337	127	3	27.3545	125	3	22.3314	125
673	RM15468	CGATGCATATTTCGACTGGAACC	CCCAATGAGAGACCAGGAATTGG	3	24.3524	295	3	27.3697	610	3	22.3469	289
674	RM15469	GCATTTAGCCTTCTATGGTGTACAGG	CTACTCCAATGCTCCAGGTTTCG	3	24.3745	387	3	27.3939	388	3	22.3684	382
675	RM15471	TGATGGATTCCTACAGGCTACTGC	GCTACCTCACCGTCGTCTACAAGG	3	24.4045	281	3	27.4254	281	3	22.3974	281
676	RM15475	TCACCTTGTTAGGAGTGTCTTCC	TCGTCATAAGTGGAGAGGTTGC	3	24.4311	354	3	27.448	428	3	22.4207	316
677	RM15476	GAGGCAGACAGATTTGTGCAAGC	GGCAGCAAGGCCATACAATAAGC	3	24.4315	396	3	27.4484	404	3	22.421	402
678	RM15479	CGGATCTGTCACTCCACATAAGC	AATCTCTGGATCTGGCTAGGTTGG	3	24.4547	198	3	27.4999	198	3	22.446	198
679	RM15481	ACCCATGCATCAGGGCTAGTGG	ATTAGAGGTCGCTGTGTGCATGG	3	24.4603	194	3	27.5054	193	3	22.4515	194
680	RGNMS1061	CAGATGTGTACAGTTTAATGCC	TGGCGACTACTACAATCTCAT	3	24.4641	282	3	27.5087	282	3	22.4553	282
681	RM15487	GGAAAGACACTCAGACACCTCACC	CATTCATCATCTCTGTCAGCATGG	3	24.5606	160	3	27.6232	160	3	22.5482	160
682	RM15488	CGCTAACCTCACTGTGCTTATCAGG	ATAGCTCCTGCCCTTACCTCACG	3	24.5765	282	3	27.6391	397	3	22.5641	266
683	AUT15489	CACCTTCTTGAGAAGCTCCTTCG	GACATCGAGAGCGAGGACAGC	3	24.584	155	3	27.6466	140	3	22.5715	155
684	RM15490	GTGGGAGAGGCGAGGGTTTAAGG	CAGGGCCCATATGTGAGTTGAGG	3	24.5844	146	3	27.647	138	3	22.5719	138
685	AUT15491	ACGAGGAGTGCTTCTACGACTACG	GGCTTTACTCACCCAGCAATCG	3	24.5879	145	3	27.6555	145	3	22.5754	151
686	RM15493	GTCCATGTCACGCTTTCCTTTCG	AAGCAGGCCTCACGCAAGAACC	3	24.6154	99	3	27.7302	93	3	22.603	102
687	RM15495	GCAGAGATCTATAGGTGCCACTCC	CGTACTGTTGCTGCCTTAGATCG	3	24.6618	255	3	27.7785	250	3	22.6488	287
688	RM15496	AAGAGGCACGCAGTTTAATCAGG	CGTAGCCGCGGATTTAGAATAGC	3	24.7169	452	3	27.8338	482	3	22.7034	455
689	RM15498	TCTCGACCTAGCCGGTACATAGC	AGATGAGGTTGCTACCTGTTGATGG	3	24.7415	169	3	27.8659	169	3	22.728	169
690	RM15499	CAAGGAGACGGACGTGATCTACC	AGCTGGTGTTGGACGACTGTAGC	3	24.7549	267	3	27.8789	261	3	22.7412	237
691	RM15500	GCAACACATCAAACTGCTGAATCG	CGTTAGGTGCGAACGAAGTTCC	3	24.7633	292	3	27.8872	291	3	22.7497	264
692	RM15513	GTCCTTGTGTTCACTTTGCAAGC	TCCCACCTAGACACAGTTCTCTCC	3	24.9856	253	3	28.0651	207	3	22.8645	529
693	RM15516	ATGAAGCCAGCGGTCGAGTGG	TTGCCGTCCGTTGGTTAATTTGC	3	25.0043	368	3	28.0938	384	3	22.8834	326
694	RM15521	GGTGAAGAACCTTCCTCCTTTATACC	TCATACTGTCCTGGACCACATCC	3	25.0417	139	3	28.1332	135	3	22.9226	117
695	RM15522	GCAGGGAGTGAGGAAGAGTTGG	CAAAGCCCATTAGCCCACTAAGC	3	25.0721	94	3	28.1658	94	3	22.9538	96
696	RM15523	CTCCGAATCGGTTAGCTTTCTCG	AGGTGACCTTCCTCGTGAGATCC	3	25.1015	199	3	28.1948	199	3	22.9832	202
697	RM15524	AAGGACAGGATCAGATTGTTCAGC	TTCTATGTGGTGTTGGTCTGAAGC	3	25.1119	382	3	28.2053	378	3	22.9936	382
698	RM15525	GGTGAATTGAATGCCCTCTACCAAGG	CCCAATTTCAGGGTTGCTATGTTTGC	3	25.1153	292	3	28.2087	290	3	22.997	292
699	RM15527	AGTGCACAAATGTCGCTGTAAGG	CCTCTAGCTCCTCTGATGCTTCC	3	25.1644	91	3	28.2566	103	3	23.0437	91
700	RM15528	CCTGGATTACTTTACCATGCATCC	CCTGCCTTGATTATGTCGAAAGC	3	25.1804	252	3	28.2767	240	3	23.0597	252
701	RM15529	ACTGAGACCAACATTCAACAGC	CTTGGCCACAATTTACTACAGC	3	25.2147	157	3	28.3147	211	3	23.0942	165
702	RM15535	TGAGTCACATGTACTGAGCTACTTCC	GTGTGTACCCTTCATTCTCATGC	3	25.3017	227	3	28.4218	335	3	23.1794	219
703	RM15536	CGATCGAGTACCTCAAGTCTCTGC	CCATCCACATCATCTTGACAACC	3	25.3068	160	3	28.4271	167	3	23.1845	160
704	RM15537	GGAACAAAGAACAAAGGCATACGG	GGATTCTAGCACCACCTTTCAAGC	3	25.3088	475	3	28.4292	475	3	23.1865	475
705	RM15538	TCAACGACTCTAGCGTTCTAGGC	TTATTGGGCCGTGTAATCTTGC	3	25.3134	472	3	28.434	466	3	23.1911	490
706	RM15539	CATGATGCATCGAGAATCTACCC	AAGCGTTGTGTCTACCAACATGG	3	25.3482	198	3	28.4652	198	3	23.226	573
707	RM15542	GGCTATTTGTGGTCATCTGTTGG	CCAGAGACCAAGGAAGAAAGAAAGG	3	25.406	185	3	28.7817	200	3	23.2843	181
708	RM15546	TTGTCCTCCATCGTACTACACTGC	CTCGTTCCATTCGACCTATCG	3	25.4408	199	3	28.5742	694	3	23.3182	199
709	RM15547	GGTGGACCAAAGAGGTACTGTGC	ATAGCCCAGCATTGCATTGACC	3	25.4424	80	3	28.5763	82	3	23.3197	76
710	RM15548	CATGCAGCAGTGTACCATGAACC	TCTATCTTGTGCTTGTGTGGATGC	3	25.4425	156	3	28.5764	156	3	23.3198	150
711	RM15549	CCATCAGAGATGATGCAATGACTAGC	TGTCTCCTCACCTGCACACTAGC	3	25.4448	281	3	28.5787	178	3	23.3222	169
712	RM15550	CCATCAGAGATGATGCAATGACTAGC	TGTCTCCTCACCTGCACACTAGC	3	25.4448	281	3	28.5787	178	3	23.3222	169
713	RM15551	CGCCGCCTAAGTAGGAGATGG	GGTGAGCCTGCTTCTTCTCTGC	3	25.4666	166	3	28.6021	168	3	23.3443	198
714	RM15552	CGGTGGGAGCAGTAGGAGTAGG	AGCTTGACGATCTGTTGATCTGACC	3	25.4669	431	3	28.6024	441	3	23.3447	436
715	RM15553	CTCCGTCTTGGACTTGGAACG	GTGGACTAAACGGCAAGCAACG	3	25.4713	127	3	28.5378	125	3	23.3531	115
716	RM15554	TTCTTCCTGCCACATCCATCC	CATATATGCATACCCAAGCAGTGG	3	25.4878	325	3	28.5543	325	3	23.3696	323
717	RM15555	GAGTTGTGTCAGTGAAGGTTGTCG	GATGCCCTTGATTTCTGAACAGG	3	25.4941	185	3	28.5606	187	3	23.376	197
718	RM15556	CCAGTATAGCACAGGCACTCAGG	CACACACATCTTGGCTAATCACTCC	3	25.5209	348	3	28.6293	352	3	23.403	360
719	AUT15563	GGACGCCACCTTCCTCTTCTGC	CGGTCATAAACGCCATTAGACCAAGC	3	25.6266	96	3	28.7169	93	3	23.4776	93
720	RM15564	GAGTTGCTTTGATTCCCAACACC	GAGGAGGCGTTGGTGAAGAGC	3	25.6437	93	3	28.7463	93	3	23.4951	90
721	RM15565	CTTTATATAGCGGACCACCAACC	TACACAATAATCCCACGGAACC	3	25.6628	237	3	28.7886	235	3	23.5068	241
722	RM15567	TGCATCGATCCTTTCTTTGTCC	CCGGGACGCTATATGTTCTTCC	3	25.6743	146	3	28.8046	199	3	23.5181	572
723	RM15569	TTTATCATCCTGGTCCTGAGTGC	CCCTATATAGACTGAGACCCACTTGC	3	25.6795	389	3	28.8098	387	3	23.5235	389
724	RM15578	ATGATAGTGTGAAGCCCAACTCC	CAGAAATGGGTGAAGATAGTGAGC	3	25.9198	261	3	29.0168	249	3	23.7393	265
725	RM15583	CCCAAATAGTCACCAGCATTATCG	TTGCCTGTGCAACCTTATGAACC	3	25.9399	174	3	29.0347	103	3	23.7588	117
726	RM15585	GATGTGTTGAACTGGTCTGAATGG	GGCAAGATCCAAGAAGAAGTGG	3	25.9593	194	3	29.0536	152	3	23.778	520
727	RM15586	GGTACTGTGCTCTTCAGGTTTGG	TGCTATTGCTTGGAACACTGACC	3	25.961	569	3	29.0553	569	3	23.7801	573
728	RM15588	ATGGCCGGTTAGAGTTAGAGTGG	ATAGACACTTTCGAGCGGATGG	3	25.9848	399	3	29.0783	554	3	23.8054	433
729	RM15592	GGAGAAACTGTTGCCGCTTTCC	ACTCCCATTAAGACCGGATCAGC	3	26.0331	201	3	29.1295	203	3	23.8526	197
730	RM15593	AGAGGAGGAGACGAGCGCAACG	CGGGCACCACTCCCATTAAGACC	3	26.0332	86	3	29.1296	88	3	23.8527	88
731	RM15594	ATCCGTCGGCTACATGAACTACG	GCTCCTCGAAGTGGAACTGTGG	3	26.0343	324	3	29.1308	330	3	23.8539	284
732	RM15595	CATCAACCAAACTACTCTCTCC	TGGTGGTTTACTGACTAGGTAGC	3	26.0791	283	3	29.1749	283	3	23.9038	282
733	RM15600	CACTCTAAACAGCGGATCTCATCG	TGGATATATCAGTTTCGCGTGTCC	3	26.1199	413	3	29.2192	414	3	23.944	377
734	RM15601	GCATCTACACCACGCATAGTCG	CATATGTACGTGCACCACAACTGC	3	26.1242	297	3	29.2235	293	3	23.948	501
735	RM15604	CAGAAGAAAGGTGACTTCCTTGG	CCTTGCATCAATCCTTATCACC	3	26.2414	98	3	29.3658	98	3	24.0695	98
736	RM15606	AGCTTGCTGAACACCGTCATCC	AAGTGACGACCTGACTTTGAGTTCC	3	26.2881	346	3	29.4165	402	3	24.1094	499
737	RM15608	CTATCCCGTCCTCCGTCAATTCG	ACACACCCTGCAGCTGTTCTGC	3	26.3268	179	3	29.4523	179	3	24.1485	179
738	RM15609	GTGGATGACTCGCCAACTTCACC	GCGGCTGCTGGATTATTGTGC	3	26.4169	168	3	29.5415	168	3	24.241	156
739	RM15613	TCGGACAACTACCATGTGTGC	TTAGGCTGTGTTCAGTTTCACG	3	26.538	473	3	29.6612	473	3	24.3489	468
740	RM15614	TCGGACAACTACCATGTGTGC	TTAGGCTGTGTTCAGTTTCACG	3	26.538	473	3	29.6612	473	3	24.3489	468
741	RM15621	TCCTCCTCTTCCTCTAACTTGTCTGG	CGCCACTAGGCACTCACATCG	3	26.6727	281	3	29.8001	285	3	24.4876	275
742	RM15622	TCTTAGGGTATTCTTCCGTTCC	CACTAGTTCTCTACTTGCACATAGCC	3	26.7015	379	3	29.8292	375	3	24.5168	440
743	RM15623	GTCGCCGAGTACCAGCAGTACC	ACGGCACATTGTGTGTTTGTACC	3	26.7067	182	3	29.8344	182	3	24.522	174
744	RGNMS1133	AATTGACTACGTGGAAGGTTAG	ATAAGGTTGATGATGGGTTTAG	3	26.72	290	3	29.8466	290	3	24.5351	288
745	AUT15624	GCAGTGAGACCAATTCATTCC	CTTTCTCGAGATTCATGTGACG	3	26.7201	81	3	29.8467	81	3	24.5352	79
746	RM15629	TGAAGCTCGACAAGAATGACTCC	GCTGATCGTTACCAAGATTCTCC	3	26.8323	194	3	29.9561	194	3	24.639	194
747	RM15630	AACTCGAAGGATCTCGCCCAACC	ACCCACCTCCTCACGCTGTACG	3	26.8363	285	3	29.9601	322	3	24.643	197
748	RM15631	AACTCGAAGGATCTCGCCCAACC	ACCCACCTCCTCACGCTGTACG	3	26.8363	285	3	29.9601	322	3	24.643	197
749	RGNMS1202b	AGTTTGTTTGGTTCTTGCTAGT	ACGCATTAAATCAAAGAAAGAC	3	26.8775	399	3	29.9939	411	3	24.6836	407
750	RM15638	AAGCAGCAGCAGCAACAATAGC	GGAGAGAAATGGACATGGAAATCG	3	26.9155	99	3	30.0217	99	3	24.7074	111
751	RM15639	GCCTCTCCTCTCGCTCAACTCC	GTTCTTGGTGACCCTGCCTTCC	3	26.9779	251	3	30.0956	254	3	24.7688	245
752	RM15642	AGAGGAGGCTTGAGGTGAAGAGG	AGGGCTGCTGCTGAAACTAAGG	3	27.0731	173	3	30.2197	173	3	24.8606	173
753	RM15643	GAGTAAGAATCCTCGGCCATTATCC	AAAGAGCCGCAATAGCGTTCG	3	27.1201	473	3	30.2895	487	3	24.9077	449
754	RGNMS1154	TCTTCTTCTATGAGAGGAGGTG	GTTCTTCCTCAACTTCTCCTG	3	27.2025	263	3	30.4047	245	3	24.9878	257
755	RM15644	GAGCTTGCCGGTGATCAGATGG	CCGGGTTCTTCCTCAACTTCTCC	3	27.2026	115	3	30.4049	109	3	24.9879	109
756	RM15645	GCAGGAGAAGTTGAGGAAGAACC	GGCCCAATACGACATGTCTCC	3	27.2027	387	3	30.4049	375	3	24.988	384
757	RM15647	CCAACTCACAGCTGATGTATAGACG	GGATGATGTCCGATTTGTAGTTGC	3	27.2617	552	3	30.455	495	3	25.0408	497
758	RM15649	TCATGGCCGACGAGAAGTTCC	GTCATGGAGCACGACGGATGG	3	27.2695	120	3	30.4629	105	3	25.05	120
759	RM15650	GCTCGAGTCCTCCATGTCTCC	TTGTTCGACCATTCACATCTCG	3	27.2699	228	3	30.4632	228	3	25.0503	228
760	RM15652	GGGAGATGCATTCAAGCATGG	ATCTGCAGAAGCTTGCTACAACG	3	27.286	323	3	30.4799	299	3	25.0649	311
761	RM15657	TGCTCCATGGGTGTACTTATCTCC	CCACAACAACTATTGTTCCCTTCC	3	27.3468	298	3	30.5273	300	3	25.1117	304
762	AUT15666	GGCCATTATGTGCATCTCTCAGC	GGATCGATCGACATCAATCTTGG	3	27.6414	176	3	30.9364	184	3	25.3853	172
763	RM15668	CATGGAGAAGAAGGATAAGGGAAGG	ACCCAACCCACCATTAGAGATCC	3	27.7231	320	3	31.0027	326	3	25.456	320
764	RM15669	GTGGGTTGGGTGGTGTTGTTCG	ACGCCATCAGGAACTCCATCTGC	3	27.7235	94	3	31.003	92	3	25.4564	94
765	RM15671	CACCTCCTTTCTTCCTTCCTTTCC	CCGCTTAGCCAACGTACTGACG	3	27.7389	379	3	31.0189	364	3	25.4735	370
766	RM15672	CACCTCCTTTCTTCCTTCCTTTCC	CCGCTTAGCCAACGTACTGACG	3	27.7389	379	3	31.0189	364	3	25.4735	370
767	RM15673	ACCAACACCAGTCCGTCGAATGC	AAGGAAGCCGAAGCGGAAGAGG	3	27.7709	226	3	31.0487	218	3	25.5025	238
768	RM15676	GCCCTAAGAGTATCTGCGCTATGG	GAAATCCCTCGTGAGATGAAACC	3	27.8034	389	3	31.0699	348	3	25.5362	344
769	RM15677	CACAGACACATCACACATCAACAGG	GGACAGCTCCTCTCAATGACACC	3	27.8154	181	3	31.0819	175	3	25.5476	175
770	RM15679	TAGATGTATGAGTCGGAATGGAGTCG	CAGACGCAGTGTGTGTATGAAGTTCC	3	27.8321	391	3	31.0996	1048	3	25.5644	257
771	RM15680	TAGATGTATGAGTCGGAATGGAGTCG	CAGACGCAGTGTGTGTATGAAGTTCC	3	27.8321	391	3	31.0996	1048	3	25.5644	257
772	RM15684	TTACCACCACCACCAGGAAAGC	AAGAGGAAGCGCATATCCAAGC	3	27.9989	298	3	31.278	298	3	25.7361	298
773	RM15687	CTAGACATTGCTGCACCCTTGC	TCTCTTGACCCTATCTCCTCTTCG	3	28.0633	182	3	31.3406	184	3	25.8008	182
774	RM15688	GGTTGGTGTGTTAGCCTATCTGG	CACACGTATCAAACTGACATGAGC	3	28.08	90	3	31.3573	98	3	25.8159	90
775	AUT15689	AAGGCTCCGTTTGAATTCATGG	GCGTAAACACAATGGGACAAAGC	3	28.084	296	3	31.3613	266	3	25.8199	290
776	AUT15690	CAGGCCTCTGATAGGAGATGAACC	GTGTGGATGCCCTAACAAATTTCC	3	28.0888	761	3	31.3664	1333	3	25.8248	703
777	RM15692	GGGAGCATATTTCTCTTGCAACC	TAAAGGATCAAGGACAGCTCTGG	3	28.092	324	3	31.3701	142	3	25.8279	332
778	RM15693	GCTGGTTATTCATGAGGCAGTGG	AAGTGCAAGTCCCTTCTTTCTGG	3	28.1054	263	3	31.3834	288	3	25.8414	267
779	RM15695	GGCTTCTCAACTCACCCGTAGC	GTCAGTCACACAGCCACACAGG	3	28.1246	192	3	31.4039	186	3	25.8607	190
780	AUT15700	AGAGTTGTTAGCATGGCAGCATCC	CAATTGGCCATTGCAAACATGG	3	28.1827	162	3	31.4617	154	3	25.9174	158
781	AUT15701	AGAGTTGTTAGCATGGCAGCATCC	CAATTGGCCATTGCAAACATGG	3	28.1827	162	3	31.4617	154	3	25.9174	158
782	AUT15702	AACTACCCAGAATTGACGTCTCC	CAGAAGAACAGACAAGGCTCTCC	3	28.1867	213	3	31.4657	173	3	25.9214	187
783	RM15704	CTGGAGGTCCACCAAGATCAGG	AGCTAGCTCTCCAGGTTTGTTGC	3	28.2021	175	3	31.4817	175	3	25.9366	175
784	RM15709	GGATCCACAAGACCATAATTGC	CAGAGCTACTACTCGCTATCTACTCC	3	28.3224	253	3	31.6011	201	3	26.0577	201
785	RM15710	ATTCCCAATCTCTCCACCACACC	CTCCTCCTCCTCTCCTCGATCC	3	28.3528	297	3	31.6315	297	3	26.0884	294
786	AUT15711	CATCGCCGAAATCCATCTTCC	AAGGCCCATTTCATTGTAGAGTGC	3	28.356	123	3	31.6347	145	3	26.0916	143
787	AUT15712	CATCGCCGAAATCCATCTTCC	AAGGCCCATTTCATTGTAGAGTGC	3	28.356	123	3	31.6347	145	3	26.0916	143
788	RM15718	CCATATTCATGTAGAGTGTCGGATCG	CATGGCTGTTCTATTCACCATCG	3	28.4534	184	3	31.7235	184	3	26.1761	184
789	RM15719	GATTCTTGGGCACTGTCATTGG	CGAATCAGCATGATCAGCATACC	3	28.455	186	3	31.7251	183	3	26.1776	180
790	RM15721	CAGCCAAGCTCTCCAATTAAACC	TGTGCCTTCTGATCTGATGTTGC	3	28.4697	162	3	31.7442	158	3	26.1915	159
791	RM15722	GGGAGAGAGACAGACAGAGAATCG	TTCATCTCACCTTGCACTCTTGC	3	28.4701	291	3	31.7446	267	3	26.1919	274
792	RM15728	CTACAGTGACCCAGCGAGACG	AGAGAGCGGATGAGGAAGAGAGG	3	28.5725	211	3	31.8572	208	3	26.297	205
793	RM15729	CCTCTCTCCCAAATCCCAATCC	ATACATACCGTCGATGGGTAGTCG	3	28.5835	99	3	31.8683	93	3	26.31	96
794	RM15730	GGGAAAGGAATGTGGATTTACACG	CAAATTACTCACCACACTCACACACC	3	28.6031	309	3	31.8908	296	3	26.3297	249
795	RM15734	TCGCTCTGCACTCTGAAGTGG	CACAGGCTACATGTCAAATCAACC	3	28.6337	256	3	31.9653	280	3	26.3537	228
796	RM15735	TCGCTCTGCACTCTGAAGTGG	CACAGGCTACATGTCAAATCAACC	3	28.6337	256	3	31.9653	280	3	26.3537	228
797	RM15736	GGTTAACACGGTGGCATAATTGG	TGAATGGGAGGTGCTAGTATTGC	3	28.6481	553	3	31.98	413	3	26.3679	450
798	RM15737	GGTTAACACGGTGGCATAATTGG	TGAATGGGAGGTGCTAGTATTGC	3	28.6481	553	3	31.98	413	3	26.3679	450
799	RM15738	GGTTAACACGGTGGCATAATTGG	TGAATGGGAGGTGCTAGTATTGC	3	28.6481	553	3	31.98	413	3	26.3679	450
800	RM15739	CTAGAGCGCGAGAGCCAGTAGC	GCCGCTAGTACTGACCAGTGAGC	3	28.6508	189	3	31.9819	187	3	26.3706	195
801	RM15740	AATTTAGCCGGACACACAATCG	ATTACGTACCGCGACTTTCATCC	3	28.6906	336	3	32.0067	336	3	26.3984	336
802	AUT15742	CAAGAGAAGCAGAGGCCCTGACC	CTTCTTGTGGCCGAGGACATGC	3	28.7485	180	3	32.0991	180	3	26.4594	180
803	RM15743	CCCATATCTTTCCCAAACACTCG	TTGATTCGTGTGACGTCTTTGC	3	28.7548	195	3	32.1054	195	3	26.4657	195
804	RM15744	CCTCCCTACCAACACAACACACC	AGGTAACCACCACCACCATCG	3	28.779	219	3	32.1305	222	3	26.4921	216
805	RM15746	CTCATTTCTCCTACTGTTCTCTCTGC	CTTCTCATTGAGGATACCTGATGG	3	28.7976	286	3	32.1503	278	3	26.5108	280
806	AUT15749	TGTCGTCGAGGATTTGGAGATCG	GAATCAATCCACGGCACAGTCC	3	28.8589	193	3	32.2178	193	3	26.5689	193
807	RM15753	AGGCGATTCCCATTTGCTTGC	AGCAGCGAGGAGGGAGAAGAGG	3	28.9405	133	3	32.3238	130	3	26.6502	127
808	RM15756	TCTCCCACTTCACCTCCTCACC	ATCCACCTAACCAACCAAGTTGC	3	29.0201	187	3	32.3977	187	3	26.7216	187
809	RGNMS1252	GAATTCCGTCTTATCCAGAGAT	TCAGTTATAATTACAGCATCAAA	3	29.0203	1201	3	32.3979	1199	3	26.7218	1202
810	RM15758	ACGGCTCCACGAGAACATCTGG	CTGCTGCGGAATTGAGCTTGG	3	29.036	130	3	32.4133	121	3	26.7375	130
811	RM15759	CAGGATCGGACAGGATCACAGG	GCTCCTGGCGCAGCTATAGACC	3	29.082	104	3	32.4665	89	3	26.7873	89
812	RM15760	TCCACGTGTTATCCTCTCTTTGC	CCAGATTCCTGCGTTGTACAGG	3	29.0899	248	3	32.4746	310	3	26.796	245
813	RM15761	TCCACGTGTTATCCTCTCTTTGC	CCAGATTCCTGCGTTGTACAGG	3	29.0899	248	3	32.4746	310	3	26.796	245
814	RM15762	GCGATCGACTATAGGATGTTTGG	TTTAGTAGAGCCAGGGATGTGTCG	3	29.1424	510	3	32.527	468	3	26.8518	477
815	RM15763	AGCGGCGTGTCGTCATAAAGC	AAGACATCTCCGTTCAAGCTTTCG	3	29.1464	146	3	32.5309	146	3	26.8557	146
816	RM15765	TGCTCTGACTTCTTCTTCACTCTGC	AGGTTGCGAAGTGGCAGTATAGC	3	29.1507	143	3	32.5362	139	3	26.8606	147
817	RM15766	CACACTCGTGGGCTTCTAATTCC	TTTGTCGCTGAAAGGATGAAGG	3	29.1583	181	3	32.5438	169	3	26.8684	177
818	RM15767	TTGCTGCAGATTCTCTCTGATCC	AAGGGAGGAAGGAAACATCACG	3	29.1988	284	3	32.5841	269	3	26.9091	280
819	RM15768	TCTCTTTCTCCTCTTCTTCCATCTCC	AAGGGAGGAAGGAAACATCACG	3	29.1989	176	3	32.5842	161	3	26.9092	172
820	RM15769	ATCACCTGATCGTCTCGGTCTCG	CTACGCCTACGCCTACGACAGC	3	29.202	124	3	32.5873	124	3	26.9123	124
821	RM15770	AAGTGAGGCGACGAGGACGAAGG	AAACGCAACGCACAGAAGGAAGG	3	29.2168	152	3	32.6019	175	3	26.927	170
822	RM15771	TCTCGTTCCTCCGTATTGTATGG	GGCTGTGTTGTTACTTAGGGTTGG	3	29.2266	262	3	32.6054	324	3	26.9306	276
823	RM15774	ACACATGCAAACGCAATGTAGC	TCTTCTGGTGAAGTTGCTTTCG	3	29.2845	197	3	32.6544	197	3	26.9781	194
824	RM15777	ACTCCTCTCCCTCCGCTTCTGC	AACCTGTTCAGGTCCTTGGATGG	3	29.3492	266	3	32.7192	266	3	27.0427	263
825	RM15784	CTTTACGGTTGCTGGGATTTGG	ACGAACACTCCACCTCCTTCTCC	3	29.4247	96	3	32.8257	96	3	27.129	96
826	RM15786	ACCAAAGCTTCAGTGTAGAGG	ACCTAAGGCCTAGTTTAGTTCC	3	29.4986	352	3	32.8983	360	3	27.2019	688
827	RM15787	ACCAAAGCTTCAGTGTAGAGG	ACCTAAGGCCTAGTTTAGTTCC	3	29.4986	352	3	32.8983	360	3	27.2019	688
828	RM15791	AGTAAGTTTGCCGCGGAGGAAGC	CTCCTTGTCGATCACCACCATCG	3	29.5311	86	3	32.9302	86	3	27.234	86
829	AUT15792	CCCGACACAACCAACACATAACC	GCTCGAATCTCATACCAAACATGC	3	29.538	191	3	32.9372	191	3	27.2409	191
830	AUT15793	GTTGGCTGGTTGCTACCACTACACG	AGCTCCGACTCTTCGCCTTGC	3	29.5421	80	3	32.9413	80	3	27.245	80
831	AUT15794	TGGATTTGTTGGTTGCTCACG	GGGTAGCTGACAAGCCACAGC	3	29.5426	354	3	32.9418	372	3	27.2456	728
832	RM8204	TGGATTTGTTGGTTGCTCACG	GGGTAGCTGACAAGCCACAGC	3	29.5426	354	3	32.9418	372	3	27.2456	728
833	AUT15795	CAGCAGAGACTATAGACACTCAAGC	TGCCTAGCTACTCTAGGTGAAACC	3	29.5722	343	3	32.9944	322	3	27.2758	337
834	RM8277	CAGCAGAGACTATAGACACTCAAGC	TGCCTAGCTACTCTAGGTGAAACC	3	29.5722	343	3	32.9944	322	3	27.2758	337
835	HvSSR03-77	TCTTTACTCGTTTCCTTTGTTT	TAGATGAAGTTGTAGATGCCC	3	29.5722	194	3	32.9945	173	3	27.2758	188
836	RM186	tcctccatctcctccgctcccg	gggcgtggtggccttcttcgtc	3	29.5741	124	3	32.9963	124	3	27.2776	124
837	RM15796	AAGCCTAACGGCAGCGAAAGC	GACGTCGTACTCGTGCCTCACC	3	29.5811	137	3	33.0033	137	3	27.2847	137
838	RM15798	TCAGCATCTTCTGCCTCACTTCC	GCTGACGCATCACGTATTCACG	3	29.6423	357	3	33.0711	355	3	27.3499	331
839	RM15799	TCAGCATCTTCTGCCTCACTTCC	GCTGACGCATCACGTATTCACG	3	29.6423	357	3	33.0711	355	3	27.3499	331
840	AUT15800	ACACCACAAACGACCAGACATCC	TTGCTGCGTAGGAGGAGAAGAGG	3	29.6498	159	3	33.0795	159	3	27.3574	151
841	RM15801	GTTGTGTCGTCCCAAACTCAGC	GTTCTTCGATCCGTTCTTTCTGC	3	29.6785	145	3	33.1076	141	3	27.387	137
842	RM15804	CATCCACTTCCTTGATCTTGTAGC	TGCTTAGCCGCTACACTACTTCC	3	29.7089	428	3	33.1802	410	3	27.4154	403
843	RM15805	CACTAACGGTGTCACTGCTTGC	ACCTCTTCCATCCCTCCTTTCG	3	29.7163	93	3	33.1877	95	3	27.4229	97
844	RM15806	ACCATGAGGTTCAGTTAGGAGTGC	AATTGACGGTGGAGTGAAGTACC	3	29.7427	393	3	33.2156	389	3	27.4492	389
845	RM15807	GCGCTGCTGATTATACCAAACC	GCTAGTAGCTTCGTTCGATCACC	3	29.7885	199	3	33.2614	199	3	27.5225	199
846	RM15809	AAAGCTGCGACGAACACGAACG	CGCCGCAGCAGAGAAGAGAAGG	3	29.8128	108	3	33.2869	108	3	27.5468	100
847	RM15811	AGCGAGCGCTCCAATTCTATACC	GAGGCTAGCTTGGTTGGGTAAGC	3	29.8219	186	3	33.2964	194	3	27.5561	204
848	RM15813	AGGTCTTCAAGGTGTGGATGC	TTGTGAATTATCCCACCCTAGC	3	29.853	278	3	33.3275	278	3	27.5871	278
849	RM15814	ATCAAATCCGCCGTCACAAACG	CGTTCAACTACGTCGCCGTGTCC	3	29.8766	199	3	33.3511	199	3	27.6108	199
850	RM15816	TAGGGAAGGAGTAGCCCAATTCTCC	CTGAAGCGACGACCACCAACC	3	29.8885	296	3	33.363	296	3	27.6227	296
851	RM15817	CTCTCTGATGTAGCAACTCATCC	TGTACTCAGCCTAACAATGTCG	3	29.8915	282	3	33.366	282	3	27.6256	278
852	RM15818	TTTGAGGAAACAATCCTCCTCTCC	TGCTTTCACCAGCTGTTATCTCG	3	29.9051	95	3	33.3796	95	3	27.6393	99
853	RM15822	CAGCATGGTCGAAACTAAAGAGC	TATGTCGATTTGTGTCAGCGTAGG	3	29.9594	498	3	33.4401	498	3	27.6937	497
854	RM15823	GCACCGTTAGTTCTCTTGTTTCTGC	GTTCACCCTACACGAACAAATGC	3	29.9933	289	3	33.4836	298	3	27.7287	281
855	RM15824	TCCATGCTGCAACTTTAGGAAGC	GGCTATGGCGTTCCAGTTATGC	3	29.9983	271	3	33.4679	267	3	27.7335	271
856	RGNMS1024	ACAACTATCGAGTCCCTGTAAG	AAGTACCAACTACTACCAAGGC	3	30.0743	314	3	33.5796	314	3	27.809	314
857	RM183	ggagcgggagagagagcccacg	tgccgatgaaggactgcgacgc	3	30.075	1365	3	33.5803	1365	3	27.8096	1373
858	RM15829	CCTTCAGTTTGAGCTTGCTTGC	ATCCTGTCATGTTGGCCTTTCC	3	30.0827	266	3	33.588	269	3	27.8174	261
859	RGNMS1310	GACATTTCTCTGTTATGCTGAA	AACGCTTTGATACTATTTCGAT	3	30.0831	211	3	33.5884	211	3	27.8178	211
860	RM15833	AGAGCAGAGGAGGCACTGTGG	CTTCGAACAAACAACGGACACC	3	30.1577	191	3	33.6552	191	3	27.8687	191
861	RM15835	CACCACCACCACAACAACAACC	AGTGGAGTGGAATTTGGGTTCG	3	30.1922	377	3	33.6901	867	3	27.9033	377
862	RM15836	CGCAACGCAATACCCTTCACG	CCGAGAGGAATCATGAGGATTGG	3	30.1941	184	3	33.6924	184	3	27.9054	184
863	RM15838	CGATGTCATTCGGTAGAAACAAGC	CCTAGTCAAGGCATGGTCAATCC	3	30.2344	262	3	33.7319	262	3	27.9453	262
864	RM15840	TGTGCCACAATGTTATGGACTCG	GTACTGCCAGTTGATTCCCATGC	3	30.2535	398	3	33.751	399	3	27.9644	398
865	RM15841	CAGTACACGGAGCAGCAGATCG	CCCAGCTGGTGTTCACCTTCG	3	30.2789	159	3	33.7762	159	3	27.9907	159
866	RM15842	GCCTAATCAACATCTCTGCTATCTGC	TACACGTTAACATGCCACTCACC	3	30.291	139	3	33.7874	139	3	28.0028	139
867	RM15843	TGTGGAGTCAACTTATGCTCATGC	CTAGGACACTGAGGCCCAACC	3	30.2948	349	3	33.7914	315	3	28.0065	275
868	RM15844	CCCTCCTCCGCCTACAAATACGC	ATGCGGAGGTCGAAGCCCTAGC	3	30.2978	192	3	33.7943	179	3	28.0094	198
869	RM15845	CCCTCCTCCGCCTACAAATACGC	ATGCGGAGGTCGAAGCCCTAGC	3	30.2978	192	3	33.7943	179	3	28.0094	198
870	RM15847	GCCGCGGTGGACAATAATTTGC	GGTGTGAGGGCGTTCACAGTGC	3	30.3445	489	3	33.9004	535	3	28.0561	747
871	RM15848	AACAGGTAGCCACTTCGTTTCTCC	CGTAGCCGAGGAGTCTCACTGC	3	30.3654	217	3	33.9231	225	3	28.0772	217
872	RM15854	AATGATTCCTTCTTGCCCTCTGG	TGGACATTGAGGGTATGCAAAGG	3	30.5416	299	3	33.9656	299	3	28.2338	319
873	RM15855	GGAGTTTAGAAATATGGGCTCTGG	TGGTTGATGTCTGAACCGTATAGC	3	30.5834	250	3	34.0072	228	3	28.2771	200
874	RM15856	TGCATCTTCACACACAGACACATCC	CAACGAGAAAGCGGTGAGACG	3	30.5964	275	3	34.0199	275	3	28.2901	275
875	RM15858	AATGGGTGCTCACCGCACTAGG	GGAGCCCTTACCCAGTCTCAAGG	3	30.6441	181	3	34.0858	181	3	28.3369	181
876	RM15859	CCAAACAATGTTGTCACGTCAGG	GGTCACGCTAAACAGGAAGAACG	3	30.7353	341	3	34.175	255	3	28.4153	319
877	RM15861	GGTGTGTGAGAAGAGGAGATTGG	GGCCCTTTGAAGACAACACTAGG	3	30.748	250	3	34.1868	211	3	28.4263	230
878	RM15864	GGAAGAAGCAAACGAAAGCAGAGG	ACATGTCGGTAGCGGTTGCTAGG	3	30.764	293	3	34.2149	290	3	28.4453	285
879	RM15871	ACGAGGAGGTTTCAAGGATATGG	TCTGATGTACCGAGAGGTTGTCG	3	30.7954	294	3	34.25	286	3	28.4755	809
880	RM15872	GGCAGGAAGAAGAGAAGAGATGG	CCTCCTCGGGTAATTGTCAGC	3	30.806	375	3	34.2611	360	3	28.4867	366
881	RM15873	GGCGTTCATCATGCTGTTACC	TATCCGTCGAACCTGATGATGC	3	30.8088	284	3	34.264	272	3	28.4895	284
882	RM15874	CAGACACAGCTCAGAGCAATTAAGC	CAGACCAACAATTCAGCAACAGC	3	30.8221	298	3	34.2772	297	3	28.5027	300
883	RM15876	ACGGGACTAAGGTGTTTGTACGC	GGGTGTAGACGCGTAGTGATGG	3	30.8671	516	3	34.3223	495	3	28.5477	300
884	RM15877	ACGGGACTAAGGTGTTTGTACGC	AGGAGAGGAGAGGTTTGGATTGG	3	30.8671	612	3	34.3223	591	3	28.5477	396
885	RM15880	GATGCTTGGATGCTGCTTTACC	AGTGTCCTCCTTCCTCCTCATCC	3	30.9734	97	3	34.4193	100	3	28.6501	97
886	RGNMS1111	ATCATACCAAGTGTCCTCCTT	ATCAACATCACATCTCACACTC	3	30.9735	215	3	34.4194	218	3	28.6502	215
887	RM15882	CCACCTCAACCACCACTTCATCG	TTGTCGCCTCCCTCAACTCAACC	3	31.0102	237	3	34.4597	231	3	28.6881	231
888	RM15883	GAGAAATGGTGCTTAATCCGTTCC	CGAATGAACAAACCACAGACACC	3	31.063	170	3	34.5023	165	3	28.7281	166
889	RM15884	TACTTCTCTCACCGTCTATGAGC	CATATATACGGCTTCTCACTGG	3	31.0742	212	3	34.5135	202	3	28.7393	202
890	RM15885	AAGAACGCCCTCGACATCAACG	ACTTGGACTCTCCCGTCGTCAGC	3	31.0788	279	3	34.5181	279	3	28.7436	277
891	RM15886	TTGTCCATCGCTAACCAAATCG	TCAGCCGATGGTTAAAGAGATCC	3	31.0974	361	3	34.537	349	3	28.7621	359
892	RM15887	CAACTGAGTTTGGAGCTGTCTGC	TTGAGTTTGATCTCCAGCTCTGC	3	31.1113	79	3	34.5485	69	3	28.7757	71
893	RM15888	GGAGTTCAGCAGCTTCAGCAATGG	CTTCGCGGTTGCTCCTCTCAGC	3	31.1124	94	3	34.5502	94	3	28.7769	94
894	AUT15890	CGCAAACGACACAAGTCATTACC	CTCAGCTCATCAAGACCTCAAGC	3	31.1569	356	3	34.6073	366	3	28.8214	312
895	RM15891	ACGGCCCATACGAATTCAAAGC	GAAAGAACGAACCCTTCGATTGC	3	31.1588	390	3	34.6093	387	3	28.8233	390
896	RM15892	TATCCCGCGTTCGAATATTTCC	ACGACTCCATTTGCATCTCTTCC	3	31.17	117	3	34.6214	117	3	28.8345	117
897	AUT15895	CAAGTTTGGGTCAGACATACAAGG	TTGGTGCTCTCTTGAGTTTGTGC	3	31.1922	297	3	34.6436	232	3	28.8572	232
898	RM15898	GACCTCGTGCTCATGGACAAGC	GCCTGCACAACAACAACACACG	3	31.215	190	3	34.665	190	3	28.8796	190
899	RM15900	CTTAAACGGTGGATGATGTTGG	TCTATCGCTATATTCTGCCTCACG	3	31.2278	196	3	34.7082	264	3	28.8917	296
900	RM15901	GGCGAACGTTTACTTTAGCTGTTGG	GGTACCACCGTCGCTGTTTGG	3	31.2656	167	3	34.7378	130	3	28.9234	170
901	RM15903	CGAATCCATCGACGAAGAAGAAGACG	GTGCATGTCACCGCTCGATCC	3	31.3103	67	3	34.7824	61	3	28.9676	67
902	RM15904	GTATCCGAAGTGTAAGCATCTCC	TGATGAAGGGTAGGAAGTAACC	3	31.3131	315	3	34.7852	321	3	28.9703	345
903	AUT15905	CACAATGCCCATGGTGTAAGC	CAGGTTCTTGGTCTCCTTCTTGC	3	31.3402	464	3	34.8144	448	3	28.9975	458
904	RM15906	GGCGAGGGACAGTATTTGACTCC	CATTGCTCAGTAAGGTCGTCTTCG	3	31.3449	293	3	34.8192	278	3	29.0022	288
905	RM15907	GTCATCCTCCTCGTCGTTGTCC	AGTACCTCCTCACCCGCAACG	3	31.3685	262	3	34.8464	256	3	29.0261	262
906	RGNMS1366	TCATCTTCCTCTGCTACTCAAT	GATGGACTTACGTAGGTGTTG	3	31.3697	390	3	34.8475	378	3	29.0272	390
907	RM15914	TGAAATTGATCTCCGGAACAGC	ATAAGCCGGCAAATTGAGATGG	3	31.4238	185	3	34.8678	185	3	29.079	185
908	AUT15915	GCTCAACTGCTGTTTAGAGGATTACC	AGCTCTCCCAAGAAACTGAACC	3	31.4305	199	3	34.8744	190	3	29.085	658
909	AUT15918	ACGTCGGGCTCATCGAGTACGG	TCCTGAGGAGGAGGTCCAGATCG	3	31.4583	275	3	34.9022	275	3	29.1134	263
910	RGNMS1060	ATATTCCTCCTCTTCTTCTTCC	GCTTGCTACTACTACAACGCTA	3	31.5274	236	3	34.9779	236	3	29.1749	241
911	RM15919	GTTGAGGGAGATGATGCAGTCC	GATTGCTCTCTCGTTCCGTTCC	3	31.5777	169	3	35.0311	169	3	29.2258	173
912	RM15920	GCACCTGATCAAGCGGAGACG	GCAATGTCGTGCATCCGTAATCC	3	31.5783	450	3	35.0317	456	3	29.2265	481
913	RM15921	CAGAAGAATGTTGGGAAAGTGC	CAAATCACAACGCTTGTTGAGG	3	31.5831	90	3	35.0365	88	3	29.2313	84
914	RM15924	GGCTCAATCCCTATGATCACAATCC	TTCCACAACAGCCCTTCAAATCC	3	31.5973	365	3	35.0508	372	3	29.2449	374
915	RM15925	CCCACTGGACAGTGAGAGTTGG	AACGCGAGGCTTTATTGACAACC	3	31.6146	199	3	35.0682	199	3	29.2626	197
916	RM15926	TCATGCTATTCCTGCTCTACACG	AAGAGAGACATGAAAGCGAACG	3	31.6613	292	3	35.1032	314	3	29.2956	280
917	AUT15927	ACGATAACGCCGACATCACTGG	GCTAAGCATCCACGGTTTCTCTCC	3	31.683	113	3	35.1249	113	3	29.3175	117
918	AUT15931	ATGGCGTCCCTCTCCCTTTCC	AATGCAGCCCTAGCAATTCAGTCC	3	31.7443	158	3	35.1866	155	3	29.3778	152
919	RM15934	AGCTGATCTGCTCAAGCTGTGG	CAGTCTCTCTCGGCCAATTAAGC	3	31.8182	183	3	35.2605	183	3	29.4578	183
920	RGNMS1356b	ACGAGAATATGAGATGAGATCC	GCTGTGGCTTAATTAGGAGTAG	3	31.8184	282	3	35.2608	282	3	29.4581	282
921	RGNMS1369	TTAGCTTATAGCTAGTCTCCGC	GGATCTCATCTCATATTCTCGT	3	31.8187	332	3	35.2611	332	3	29.4584	332
922	RM15935	GACTTTGATTAGACAGAGGCCAAGC	GCGCCAGGACTAAACTAAACAGC	3	31.9785	143	3	35.3365	137	3	29.5204	133
923	RM15937	GGAAGAACCTGCGTATCAAGACC	CCACACGGAAGCAGAATTAGCC	3	32.0008	172	3	35.3587	170	3	29.5435	182
924	RM15939	ACATTTCGTGCTGAAAGACTGG	GAAATCAGTGTACGTAGGATCAGAGG	3	32.042	174	3	35.3712	174	3	29.566	174
925	RM15943	CAAGATATCCTTGCCGTTCTCG	GTTCAGTTCCAGATTTGCCTTGC	3	32.1554	264	3	35.5034	264	3	29.6733	270
926	RM15944	CGGAGGAAGTATTCCTTAAGAGC	AATCTGGAAGTTGGAACTCACG	3	32.1737	359	3	35.5217	393	3	29.6915	320
927	AUT15947	CGTGCAGTGTCAAGTGTGTCAGAGC	AATTCCTCCTCTCCTCGCGTTCG	3	32.1899	95	3	35.5377	97	3	29.7075	93
928	RM15948	GAGAGTGGGTGAGAAGGATCAGC	ACAGCAGATTTGTTGGCATCTGG	3	32.2254	95	3	35.5733	95	3	29.7424	95
929	RM15949	TTTGATGAACTGATGGCGATGG	GCGGGAGACAATACAAGTCAACC	3	32.2262	151	3	35.5741	151	3	29.7432	151
930	RM15951	CCAGATGAAAGAGGAGACATAGCC	CATGATGAACAGCAACAACTAGCC	3	32.2494	257	3	35.5971	257	3	29.7664	257
931	RGNMS996	AGATGAATGGTGATTGATTCTT	GCAACAACTAGCCATCATAATA	3	32.2495	132	3	35.5973	132	3	29.7665	132
932	AUT15952	TGCTCCTGTTGTCATTCTTTGG	ATAAGATCGACTTTGCCGACAGC	3	32.25	249	3	35.5977	249	3	29.767	231
933	RM8267	TGCTCCTGTTGTCATTCTTTGG	ATAAGATCGACTTTGCCGACAGC	3	32.25	249	3	35.5977	249	3	29.767	231
934	RM15953	CTCTTCAGGACTGCGCCTCAGC	ACGCGAGCCCATAATCAAGTCG	3	32.3094	174	3	35.6595	174	3	29.8259	174
935	RM15954	GCTTCCCTCTCCTTCCACTTCC	TGACTTGTGAGTGAGTGGTGACG	3	32.3544	132	3	35.7045	132	3	29.8722	132
936	RM15956	CAATTTCAGACATCCACCATGC	CTCGTCCCATGCACTAACCTAGC	3	32.4029	279	3	35.7516	363	3	29.9213	277
937	RM15957	GAACAGCCCACTTCTCCATCG	ACCAGGCCATGTACCTCTCTTCC	3	32.4166	177	3	35.7654	177	3	29.932	175
938	RM15958	AGACGCTTAACAGGTGCATTGG	GCTGTGTTTGGAGTAGCTCTTCG	3	32.4259	394	3	35.7747	394	3	29.9412	398
939	RM15959	TAAGTATCCGCGTTGGTTTGTCC	GACACTTGGTTTCCGCTGATCG	3	32.4304	289	3	35.7792	289	3	29.9458	289
940	RM15961	CTACTCCAAGGTCGCCTACATCC	ACAGTTGGACGCTTCTTGATTGG	3	32.449	133	3	35.7978	133	3	29.9643	133
941	RM15962	CCCTCATCCATTCCGTATATTTCC	GCGTTGATAACTTCACGCTTGC	3	32.4549	152	3	35.8037	152	3	29.9703	152
942	RM15968	ATGCTTGCAGCATTGTGCTTCG	CCTTATGGGTTGGTGGAGTGAAGG	3	32.5109	98	3	35.8593	98	3	30.0229	100
943	RM15969	CTACGGTGTCATTGCGAGATTGG	TGCATGCATCTATCAGGAGGTATCC	3	32.5198	284	3	35.8688	284	3	30.0318	284
944	RM15973	TCATGCACATCTCAGGTCTCACC	GTTTAATCGCTGTCGTGAGTTGG	3	32.5939	183	3	35.9455	187	3	30.0963	183
945	RM15974	GAACGTGAAGGATCTGACACTGG	GATTCACCATCTTCTTTCCCTTGC	3	32.6011	172	3	35.9524	172	3	30.1034	172
946	RM15975	GCGGCTTAAATTGACCATTGC	AGCTACAGATCCCAACCATGTCG	3	32.6019	178	3	35.9532	175	3	30.1042	178
947	AUT15976	TCCTCCTCACTCGATCATAATGC	TTCTCCTACTTGACTGGAACATCG	3	32.6041	186	3	35.9554	191	3	30.1065	176
948	RM15977	ATGAAGAGCGCGAGGGAGATGG	TTGGCCTTTGGAGCTCGATTGC	3	32.6361	95	3	3.49487	89	3	30.138	95
949	RM15978	ACTCCGACGACAACCTCATCTCC	GAGAGCGCCTTCAATGATCTCC	3	32.637	385	3	3.49405	382	3	30.1389	385
950	RM15979	GGAAAGCCAGATACCTTGTGTGG	CACGCACGATCCTGTTTACTACC	3	32.6899	186	3	35.9871	186	3	30.1753	186
951	RM15981	GGTTAAAGGGAGGACACCACTCG	TCTAGCCAGGCATGACAAGAACC	3	32.7048	258	3	36.002	206	3	30.1902	214
952	RM15982	CCTTTCTTGGAGAGAAGGATACC	AGTTAGTCCTCCACAGGTAATGG	3	32.7313	185	3	36.0272	196	3	30.2175	182
953	RM15983	GTCAGCTTAGATAGGGATGAAACC	CCTTGATTCCACAGATGTAACC	3	32.7398	96	3	36.0342	118	3	30.2245	238
954	RM15985	GTTTGGATCTAGTGCGCCCATGC	GCTAGTGATGTGCATGGCTGTGG	3	32.7562	229	3	36.0532	226	3	30.2405	229
955	AUT15986	CATCATTGCGCCATGTACTCG	CATTGCTTCGGTTATCGATGAGG	3	32.7727	97	3	36.0697	97	3	30.2576	97
956	AUT15989	AAGAAGAAGCGAGAGCGAGAGG	TCCTCCTCTTGACGTGTTGAGC	3	32.7852	99	3	36.0824	102	3	30.2699	96
957	AUT15991	GTCGACATGCTCGTGGTTCTGG	CCCAAGTTCGTCGACCTCACC	3	32.7955	191	3	36.0929	189	3	30.2801	183
958	RM1004	ACGACCCCTCCTGGTTCTG	CTCGTGGTTCTGGTCACAAC	3	32.7955	191	3	36.0929	189	3	30.2801	183
959	RM1004	GTCGACATGCTCGTGGTTCTGG	CCCAAGTTCGTCGACCTCACC	3	32.7955	191	3	36.0929	189	3	30.2801	183
960	AUT15993	ATGACCTTCCCGACAGTGGAAGC	GGCTGATCATGGGAACATCATGC	3	32.8421	189	3	36.1385	189	3	30.3375	180
961	RM15995	GTTCGTCTACGCCGGCTTCACC	CTTCCCGACGAAGAAGACGATGC	3	32.8593	255	3	36.1571	255	3	30.3538	255
962	RM15996	TAGTCGCCAATCCCAACAAACC	AGTGGTGGTGGAGTGGAGTACG	3	32.8782	161	3	36.1761	152	3	30.3727	161
963	AUT15997	GCTCTGCTAATGGCACTGAATCC	CCTACCATGTGAGCAGTAGCAAGC	3	32.9349	157	3	36.2277	147	3	30.4262	149
964	RM15998	GGAAGCTCATCTCATCTCGTTGC	CAATGGGCTAAACCGAACACG	3	32.9404	142	3	36.233	142	3	30.4316	142
965	RM15999	AATCACACGCGAATCACAACACC	ATGGTGCGGGAACCCTATCACC	3	32.946	176	3	36.2392	162	3	30.4367	170
966	RM16000	TCTGTACTGAAATGGTCTCCAAGC	GCTATTGGTTCACCAAGCAAGG	3	32.9662	435	3	36.2723	436	3	30.457	501
967	RM16002	TAATCATCACTCGCACTGTCACG	GGTGGAGCTAACGGATTTGAGC	3	33.0046	259	3	36.3271	253	3	30.4961	259
968	RM16003	GAATCACCATGCACCTGCTACC	AGCCTGTCCATGTGCTTACTGC	3	33.0384	140	3	36.3668	125	3	30.5298	125
969	RM16004	GCCTCGCCATAGGAGTACCTAACC	CACCGCCGCTATTCTATGACG	3	33.0396	114	3	36.368	114	3	30.531	114
970	AUT16005	CGGTCGGTGTCGATATGGTACG	TGGAAATTCCTCGGATGATGAGG	3	33.0598	82	3	36.3919	76	3	30.5528	76
971	RM8275	CGGTCGGTGTCGATATGGTACG	TGGAAATTCCTCGGATGATGAGG	3	33.0598	82	3	36.3919	76	3	30.5528	76
972	RM16008	CAGTCCATCCCACTCAGAATCC	GGTGGTGTGGTGGTAGTAGTTGG	3	33.1164	85	3	36.4823	85	3	30.6087	85
973	RM16009	AGGAGGAAGCTGAATTCCAAACC	AACCCAGCATTCCAATAACTGC	3	33.1408	156	3	36.5022	156	3	30.6272	156
974	AUT16013	CAAGCGGAAACACAGAATACGC	GGAAGAGGAGGATGTGGATGAGG	3	33.2947	261	3	36.6216	249	3	30.7633	252
975	AUT16014	CATCTCCAAAGCTCTCTTCTCACC	ACTACTCCACCAAAGCCAAGAGC	3	33.3053	188	3	36.6322	186	3	30.7738	183
976	RM16015	ACTGGGTCAAGAGAGGACTAACC	GCCATCACCAACCAATTAACC	3	33.3389	92	3	36.6647	92	3	30.8052	92
977	RM16017	CACCTCCAAGGGTACGATCACG	ATGGCCAAGCTCACGGTATTCG	3	33.3771	155	3	36.7054	152	3	30.8432	155
978	RM16018	GTTCTTCTGCGACAGCATCTCC	CTCCATTGGTGTCTTTGATCTTGC	3	33.3919	133	3	36.7449	133	3	30.858	133
979	RM16020	AGCAGCTCAGATTCAGGTGATCC	GTTTGCTACTACCTCCGTTTCAGG	3	33.4342	247	3	36.7874	216	3	30.9001	276
980	RM16021	AGCAGCTCAGATTCAGGTGATCC	GTTTGCTACTACCTCCGTTTCAGG	3	33.4342	247	3	36.7874	216	3	30.9001	276
981	RM16024	AGATGCAACAAGCACAACACTGC	GAGATTGTCGCTGGATCGAAGG	3	33.4885	182	3	36.8542	198	3	30.9558	182
982	AUT16025	GTACTGTGCATCAACGGCTAACG	GGTCATCAACTCATCACGAGTGC	3	33.492	403	3	36.8578	411	3	30.9594	393
983	RM16026	CCTCTCACCATAACTCGAAACAGG	TCTGCCATGAAAGCCTACTATACG	3	33.4953	114	3	36.8607	119	3	30.962	114
984	RGNMS1149	GGGACGTTAATTAATCTCAGTT	GACTGATTGATCGATTACAAGG	3	33.4965	106	3	36.8621	94	3	30.9632	99
985	AUT16029	AAAGATCCGTGTCCTCAATCAGC	CCTAAAGCCCTTCCTTGTTGTGG	3	33.5328	158	3	36.9139	152	3	30.9992	152
986	RM16030	GCGAACTATGAGCATGCCAACC	GGATTACCTGGTGTGTGCAGTGTCC	3	33.5647	99	3	36.9509	107	3	31.0314	97
987	RM16031	CCTCCTCATCACCACCATCACG	CCGTAGTTGTCGAGGCAGATCG	3	33.5871	317	3	36.9785	317	3	31.0535	317
988	AUT16032	GCTAGCTACTCTCCACCACTCTGG	TCGCATCCACTATTCCACTTCG	3	33.6112	266	3	37.0053	270	3	31.0775	262
989	RM16033	TACCTTATCCCGATTGCTCAAGG	TAAGAGAAAGCCTTCCCGACTCC	3	33.6378	154	3	37.0183	154	3	31.1013	154
990	RGNMS1260	CGCAATAGCCTCACTAGATAA	AAACTATCCAGAAAGGAAAGG	3	33.6381	322	3	37.0186	322	3	31.1015	322
991	RM16034	CAGGTGGAGATGGTGGAGTTCG	CTGGTCGGCTGGATTTACTTGG	3	33.7031	169	3	37.0841	169	3	31.1589	169
992	RM16035	GGCGTCGACATCTCTCCTCACC	TAGGGTTCGGCCGTTCAGAGAGG	3	33.786	78	3	37.1789	78	3	31.2416	78
993	RM16039	CAACTGTGCAGTCTTCTGTGTGC	TCAGCTTTCTCGACCTCAAATCC	3	33.8675	169	3	37.2884	169	3	31.3221	169
994	RM16042	AGAGGAGAAGCGAGCGAGAAGG	CGGGAGGAGCTAGGGTTTCACC	3	33.898	182	3	37.3204	205	3	31.3528	160
995	RM16043	AGAGGAGAAGCGAGCGAGAAGG	CGGGAGGAGCTAGGGTTTCACC	3	33.898	182	3	37.3204	205	3	31.3528	160
996	RM16044	CCAGGGAACCGATAGCAGAAGC	CAAGGAGAGGAGAGGAGCAGAGG	3	33.9212	295	3	37.3435	280	3	31.376	295
997	RM16045	ACCCTTTCTCACAGCTCAAAGG	CACCTCAAGAACTTCACCTACTCC	3	33.9346	307	3	37.3567	307	3	31.3894	307
998	RM16046	ATGTGCTGCTCTTTCTCTGATGC	CGAACTCAGAAGAACACCCTCTAGC	3	33.9422	93	3	37.3692	93	3	31.397	93
999	RM16047	AACTTCGCAAGGGTCGGAGTCG	CTGCTTGAGGGCGTTAACGATGC	3	33.9469	219	3	37.3739	219	3	31.4017	219
1000	RM16048	ATCTCCTGAGCTCGAAGCTCTCC	ACAGAATCAGAAAGCGCACACC	3	33.9566	196	3	37.3836	193	3	31.4114	196
1001	RM16051	ATGCCCTGCTAGTGCTAAACTGC	GGATTCATGGAGCTCTTTGTGC	3	34.0084	130	3	37.4346	128	3	31.4675	142
1002	RM16052	ATGCCCTGCTAGTGCTAAACTGC	GGATTCATGGAGCTCTTTGTGC	3	34.0084	130	3	37.4346	128	3	31.4675	142
1003	RM16053	AACTGATGTGATCTTGCGTCAGG	AATCTTTCCATCACCGCTCACC	3	34.024	141	3	37.4587	135	3	31.4833	134
1004	RM16054	TTTCAGTCCCAGTCTGCAGTAGC	GTCACGGTCAGGTTCTTCTCTCC	3	34.025	145	3	37.4597	165	3	31.4843	162
1005	RM16055	CGAGGTCCTTCTCCAGCTTCTGC	GTGGTGCCGGTCGATGTTAAGC	3	34.0419	126	3	37.478	114	3	31.5012	120
1006	RM16057	CTTCTCCTTGAGCTTGGACATGG	TCGAACACCTAGGCTACAACTCG	3	34.0609	285	3	37.4974	276	3	31.527	285
1007	RM16058	GATGGCTTCACTCCTGAAAGTGG	CGGTGGTGCTCTTCTCTTACTTCG	3	34.0781	521	3	37.5173	529	3	31.5442	510
1008	RM16060	AATGACGCTGCAGGCTAGATACG	GTCAGACACGAGATCACGAGAGG	3	34.101	84	3	37.5397	78	3	31.5668	82
1009	RM16061	GATCATTGCCAGCTCATGATGG	TGTTGGCTGGCGTAATTTGTACC	3	34.1273	188	3	37.5687	188	3	31.5931	192
1010	RM16062	AGCTGGGTTCCACCACTTACACG	CCACTGCCATTACATGCTCTCG	3	34.161	452	3	37.6022	451	3	31.6264	494
1011	AUT16064	GAACAAAGAACCAGAGCAAGATCG	CCCACCGGCTACAAATACACC	3	34.1753	198	3	37.6165	188	3	31.6407	196
1012	RM16066	ACGGAAGCATCTACATCGTCTGG	TCGCTAGAGTTACAGCATGGAAGG	3	34.2188	191	3	37.6603	188	3	31.6837	191
1013	AUT16067	CGAGAAGAAGGAGCCCATCTCG	GCGAAGCGAAGAGGAGCAAGG	3	34.2442	89	3	37.6832	83	3	31.7104	91
1014	RM16069	GGTCTCTGGCGAGCAAGAGTAGG	CACTGGAAGAGAAGAAACGATACGG	3	34.2724	176	3	37.7028	176	3	31.7298	176
1015	RGNMS955a	CTATTTGGAACTAGTAGGCGAG	TACTGCCTCTCTCATCATGTAA	3	34.3035	396	3	37.728	389	3	31.7553	393
1016	RM16071	TTCGATGAACGATCTGGTTTGC	GCTTTGGTAGCCAACCTTGTACG	3	34.3038	96	3	37.7283	90	3	31.7556	93
1017	RM16074	GACGACCACCAAGAAAGTGATCG	ACAGCCCGTCGATGAAGTTTAGC	3	34.3398	103	3	37.7587	94	3	31.7921	103
1018	AUT16077	AGCAACCGGTGGCCTTCTTGG	CAGCAGCAGCAGCAAGTGTAAGTGC	3	34.3694	98	3	37.844	98	3	31.8218	101
1019	AUT16078	TCTTCTTCTTCTTGCTCTCACTCTCC	CATAAGCAGAAGCAACTCGTAGAGC	3	34.3695	90	3	37.844	90	3	31.8218	78
1020	RM16081	CCTCACCAGCCTTAATGATCTCG	ACTCCTCCATTCATCTGCGTACC	3	34.3946	331	3	37.8772	331	3	31.847	325
1021	RM16082	TCTACGTGTAACCAACACATCACC	CGATGAACGCTACTATCCAGAGG	3	34.4085	660	3	37.9043	638	3	31.8608	652
1022	RM16083	ATTTAGCTTTCGGGCCTACAGTTCG	CAGGCGTCGATGTTCTTGAGG	3	34.4433	362	3	37.9471	362	3	31.8956	368
1023	RM16086	AGTAGCCATGGATGCCCTCTCC	AGTCGAACCGCTCCTCCTTACC	3	34.4894	238	3	37.9946	230	3	31.9415	204
1024	RM16090	TACTCTGATGATGCAGGCTGACG	GGTGAACAACACCACCCTCACC	3	34.5373	75	3	38.038	72	3	31.9801	75
1025	AUT16092	TGCTATACCCAAATGTCCAAGC	ATCTTCTGAGTGCTGCCAAGC	3	34.567	399	3	38.0776	385	3	32.0049	361
1026	RM1373	TGCTATACCCAAATGTCCAAGC	ATCTTCTGAGTGCTGCCAAGC	3	34.567	399	3	38.0776	385	3	32.0049	361
1027	RM16094	ACTGCATGCATACAACCAAGACG	CCGAATGACAGTAAGATCTGTTGTGG	3	34.627	218	3	38.1432	236	3	32.0642	204
1028	RM16095	GAGCTGCAGTGATCGGTAGAGG	CATGAGCTTGATGGTGGATTCG	3	34.6284	265	3	38.1445	265	3	32.0655	265
1029	RM16096	GAAGTAATGCAAGCATGCAACC	AGGCCTGATCATGTTTCTGTGC	3	34.6299	325	3	38.146	325	3	32.067	325
1030	AUT16097	CGCCTCGTAAGGTTGAGATCG	TGCCCTGTTCTTTCCATCTTGC	3	34.6532	382	3	38.1701	358	3	32.0909	367
1031	AUT16098	CTGTCTTTCGCTTTCCGTTGC	CGGTGACGTCGGTGTAGAAGG	3	34.6822	172	3	38.1862	172	3	32.1096	172
1032	RM16100	TTCGTCGAGTGTTTGATTAGGG	GTCACCACTGGATAGTCGAATCC	3	34.6939	218	3	38.1978	224	3	32.1215	230
1033	RM16101	CGCTTCTTCGCCGACTTCTCC	ACTGACCTCTCCTCCTCCCAACC	3	34.705	236	3	38.2089	236	3	32.1327	239
1034	RM16106	TCAAAGGATGGCTTGACCTATCG	CGTAGGAGTCTCCATGCAAATCG	3	34.7664	175	3	38.2579	166	3	32.1815	169
1035	RM16109	CAGAAACTGAGGAGAGAGAAAGATCG	CGATTCAGAGCCATGCTACCG	3	34.8106	292	3	38.2967	294	3	32.2268	298
1036	RM16110	GAGCTACACGTGAGATCGAGTGC	GGTATATGCGTGTATTGCCTTGG	3	34.8246	355	3	38.3106	352	3	32.2407	343
1037	RM16111	CCGCCCTTCTTCATGGACTCG	GGTGGTATATGCGTGTATTGCCTTGG	3	34.8247	236	3	38.3107	233	3	32.2408	233
1038	RM16112	CTCCCTGTCCTGTGAATGTTTGG	CAGACAGCCACAGTAGCATCAGC	3	34.8265	281	3	38.3125	277	3	32.2426	285
1039	RM16121	GACGTCAGCGATCTCCACTACG	CAGCTGTTGCCTGTTGCATAGC	3	34.9802	174	3	38.4921	170	3	32.3718	174
1040	RM16125	GGTGAAATAGTTGGCTTGGGTAGC	TGTATGGATTGAGGTGGGTTTCC	3	35.0437	495	3	38.5345	495	3	32.4105	495
1041	RM16130	CTCAAGGGAGAAAGCGTAAAGC	TCTAGTAGAGGCGGAAACAAGG	3	35.0861	276	3	38.5888	271	3	32.4522	277
1042	RM16132	CCAAGTAGACGACCACCCAACC	GCCCTAACACACAATCAACATCG	3	35.2578	281	3	38.7548	284	3	32.6169	287
1043	RGNMS1336	AATTAATTCATCCAGTTTCGTC	GTAACAGCGGCAGACCTAAAGT	3	35.2887	118	3	38.7855	118	3	32.6471	118
1044	RM16137	GACTCCTCCATGCGTGCGTAGC	GCGGTGTGTGGATAGCAGAAAGC	3	35.3315	411	3	38.8306	407	3	32.6918	405
1045	RM16138	CTGCACTAATGAACAAGCGAAACC	TTCTGTAAACGCTCCTTCAGTGG	3	35.4697	367	3	38.9753	371	3	32.8292	325
1046	AUT16139	CGACGCAACCTATACTTGACAAAGG	GGTGTCCCAGCAAGTATTTCACC	3	35.474	153	3	38.9797	141	3	32.8335	149
1047	RM16143	CCTTTGGTTGCGAGTGGTTGG	CACGCTTCGAGAGAAGACGAAGG	3	35.6137	253	3	39.1768	246	3	32.9773	253
1048	RM16145	CCTCCTCCTATCAATTCTCCATTCC	TGCTCTCTTCTTCTTTCCCAAGG	3	35.6295	96	3	39.1924	96	3	32.9929	96
1049	RM16147	GAGATCATCCTGAACAACCACTGC	TGTCCACCCAAACCCTCTTTACC	3	35.6773	193	3	39.1222	210	3	33.041	189
1050	RM16148	GCAGCATGCGAGGAGTATGTAGG	ACCGAAGCTTCTTCTCCACTTCG	3	35.7515	175	3	39.268	175	3	33.0826	175
1051	RM16149	TGAGCAAATGATCCAAACCCAACC	CTCGCCGGTAAGCTCCCAAACC	3	35.783	436	3	39.2993	440	3	33.1146	438
1052	RM16150	TCCATGGGCTTCTTAGTAATGC	GTTGAGAAAGAGAACGGGAAGG	3	35.8196	428	3	39.3313	380	3	33.1464	355
1053	RM16152	TGGTTGTGGTATAGCACGGTAAGC	TGACCCAAGGAGATACTAGGTTGC	3	35.8714	264	3	39.3831	202	3	33.1974	212
1054	RM16153	TGGTTGTGGTATAGCACGGTAAGC	TGACCCAAGGAGATACTAGGTTGC	3	35.8714	264	3	39.3831	202	3	33.1974	212
1055	RM16156	CAACGCAAGCCCTAGATCTCTCC	CTCCCAGATCTCGAATTCTCTCG	3	35.963	169	3	39.4736	169	3	33.2748	169
1056	RM16159	GTGAACTGCCTCGACTGCAACC	GACACCATGGAGAAGGCTTTGC	3	36.0518	256	3	39.5628	256	3	33.3644	250
1057	AUT16162	CCAGCATCATCATTGTCATCATCG	ATCCATCCAGCAGGAGAAACAGG	3	36.0844	387	3	39.5865	618	3	33.3887	384
1058	RM16163	GTGGCAACTAATTAAACACGCACACG	CAACCAACCTAGATTCCGATGAACG	3	36.0907	168	3	39.595	201	3	33.395	201
1059	RM16173	TGCCAAGCCTTTCTCTCTATAAGACC	CTTCTTGGCCCACTATCTGTTGG	3	36.2579	193	3	39.7777	192	3	33.5279	184
1060	RM16175	AGCTTTGGTTTCTTGGCTTTGG	ATTAGCGTTGAACCCAAGTGTGG	3	36.2853	136	3	39.8152	136	3	33.5545	170
1061	AUT16177	GTACTATGCGAGCGTAGCAATCC	CCCAATCCATCCTGGTTATTAGC	3	36.3366	94	3	39.8665	94	3	33.6059	91
1062	RGNMS1400	AGCGTAATTCAAATCCATACTT	ACAACATCTGTACTCTCAGCAG	3	36.3367	315	3	39.8666	315	3	33.606	312
1063	RGNMS944	AATACTAATCGCGAAATTAACG	AAGTATGGATTTGAATTACGCT	3	36.3371	379	3	39.867	379	3	33.6064	379
1064	RM16178	CCGTCTCCTTCTCGGTGTTCTGC	AGAGGCTCCAGCGCCAAATCC	3	36.37	284	3	39.8998	281	3	33.6389	284
1065	AUT16183	GAGATGGCAGTGTCAAGCTAAACAGG	TGAGGACGCCAATATGGCAAGG	3	36.4461	166	3	39.98	161	3	33.7283	146
1066	AUT16184	AGAAATGGTGAAAGATGGTGCTACCG	CTGAATGTTCTTCAACTCCCAGTGC	3	36.4464	158	3	39.9802	206	3	33.7285	208
1067	RM3329	AGAAATGGTGAAAGATGGTGCTACCG	CTGAATGTTCTTCAACTCCCAGTGC	3	36.4464	158	3	39.9802	206	3	33.7285	208
1068	RM16190	GCACAGAGTGAGTTCTTGATCACC	CTCCCTCTCCTCTTCGTCTTCC	3	36.5086	284	3	40.0597	284	3	33.7818	284
1069	AUT16191	GTGGGCAGATTATGGTACGATGC	AAGCATGTCCCTGCAACTTTAGG	3	36.5274	270	3	40.0788	272	3	33.8006	425
1070	RM16197	GATCTGATCCAAGAAGGACTCACG	CCGTCTCTCTCCTCCTCTCACC	3	36.6807	272	3	40.2635	281	3	33.9185	272
1071	RGNMS1351a	TAATCTCTTCCCATCAGAGAAC	TGGTTATACAACATTAGGGATG	3	36.6935	367	3	40.2761	371	3	33.9311	365
1072	AUT16199	TCAGCACTGATCGAACAATAGG	GCAATGCTGAAATTCTCTGTGG	3	36.6937	291	3	40.2763	295	3	33.9313	289
1073	RM5548	TCAGCACTGATCGAACAATAGG	GCAATGCTGAAATTCTCTGTGG	3	36.6937	291	3	40.2763	295	3	33.9313	289
1074	RM16200	GTGGTAGGGCGAAATGATCTGC	ATCACGCGCTCCTACCTCACC	3	36.7386	193	3	40.3184	231	3	33.9719	195
1075	RM16201	GGTCTTGTCAATATTCTTGCCTGTCC	TGTCCAGTTTCAGAACATGAGTGG	3	36.7431	287	3	40.323	278	3	33.9764	293
1076	RM16202	GCCATGGTCGGTGAAGATCTGG	AGCTGCGGAAGCTGAACTGAACC	3	36.7499	251	3	40.3298	257	3	33.9832	254
1077	RM16204	TAACCATCTGCACCACCGTACC	CTCTATGTGCCGTGATCAAATCC	3	36.7993	251	3	40.3681	262	3	34.0189	254
1078	RM16206	CCCAAATGTAGTATGCGCCCTAGC	AGCGCGACGATCTCATCAACG	3	36.8102	586	3	40.3789	586	3	34.03	586
1079	RM16207	TAGAGGAGGAGGCGGAGAAGAGG	CTACTTCCATTGGAGAAGGCAAGC	3	36.8239	165	3	40.3977	165	3	34.0437	165
1080	RM16210	TAATGTTAGTGGTGGACGTAGG	CTACATGTTCCACGAAAGTGC	3	36.9131	439	3	40.4794	1321	3	34.1187	443
1081	RM16211	AATGCTAATGGCGACTGACTTCG	ATGGGCTTGTTTGATTGCATCC	3	36.9183	230	3	40.4853	218	3	34.1221	221
1082	RM16212	CCATGCAACACTGACTACTGACTAGC	GAAGGAAGGAAGTGAGGTATGTATCG	3	36.9511	382	3	40.5203	382	3	34.1509	382
1083	RM16213	CACTACGACCACCTCCAACACG	ATCATGCCTGGTTTCGGTTTCC	3	36.9514	292	3	40.5205	288	3	34.1512	292
1084	RM114	cagggacgaatcgtcgccggag	ttggcccccttgaggttgtcgg	3	36.9609	434	3	40.5301	434	3	34.1607	434
1085	RM16214	TCTACCTCACCGGCTCCTTTACC	TTCCCAAATCAGCAGTCTGATCG	3	36.9759	194	3	40.5515	194	3	34.1757	194
1086	AUT16216	TCTTGATTGCTGGACCACATGC	TCGAGCTAGAAGACGACACACAGC	3	36.9989	175	3	40.5745	175	3	34.1987	187
1087	RM16217	GCTGCTGCCTAGCTCTATGTAATGG	GTGTTTGAATCGTCTCAACCATCG	3	36.9993	177	3	40.5749	160	3	34.1992	178
1088	RM16218	CCTGCAACCAACAATATACTCCTAGC	ATCATAGATGGGTACGTGCAAACC	3	37.0028	281	3	40.5473	277	3	34.2027	281
1089	RGNMS1364	TACTCCTATTATCCATCCATCC	CCTACAGCAAGAAGAAATCAAT	3	37.0029	340	3	40.5473	336	3	34.2027	340
1090	RGNMS1318	GGTTAGTTTCGTCTCTAGGTTG	GCCTCTAGTTTCCCACTTACTA	3	37.0544	372	3	40.6357	369	3	34.2487	371
1091	RM16225	CGACCGGAGGTTTCTTTCTATCG	ACCTGGTACGACGCCTTCTTCC	3	37.0548	257	3	40.6361	266	3	34.2491	257
1092	RM16227	GGTACTAGAGGAAGCAGACCGATCC	GGTGCCCTAAACGAGTATTAGATTGC	3	37.056	175	3	40.6373	163	3	34.2503	163
1093	RM16228	AGAGGCGCAATTGGAGTATATCG	TGGACAAGACGACGATGACTAGC	3	37.0565	178	3	40.6378	174	3	34.2508	178
1094	RM16230	GCTCAGATCCCTCAGCTTCTCC	CCAAACAACAAGGAAGGAAGACG	3	37.0737	244	3	40.6551	244	3	34.2679	244
1095	RM16231	GATGGCCTTGTAGTCGACGTAGG	GCTAGCTCCAAGAGCTTCTTGTCC	3	37.0756	287	3	40.657	261	3	34.2696	267
1096	RM16232	GACTCATCCGCTGAGAGTTTCG	GAGGTATCCGGAGAGGAAGAGG	3	37.0795	198	3	40.6609	192	3	34.2735	204
1097	RM16233	CTGAGGTTGTTGGAGGGAGAGG	CCGTGTTGTGTGCTAGTGGTACG	3	37.0957	94	3	40.6765	100	3	34.2895	85
1098	RM16234	AGATTGATCTTCTGGAGGTAGC	AATCTGATGCTCTCACTCACC	3	37.0987	511	3	40.6795	418	3	34.2925	684
1099	RM16235	ATGCATGCCAATCATGTGAAGC	ATAACCGTGAGGAGAGGGACAGG	3	37.0995	155	3	40.6802	155	3	34.2934	155
1100	RM16237	GTTGGAGTTGGAGTTGGTGATCG	ATGGAAGGGAGGAGAGGAGTAGC	3	37.1223	193	3	40.7031	175	3	34.3117	183
1101	RM16238	GCAGCGCATCATTGTATTAAGG	GGACACTAAATCAGAAACCCATGC	3	37.1269	196	3	40.7077	190	3	34.3164	175
1102	RM16240	ACGCCTGGTTCCATTTCTTCC	AATCAATTCCGCATCCGAAAGG	3	37.1909	282	3	40.7573	276	3	34.377	273
1103	RM16241	ATTGGGAGGCAGACAAGATGTGC	TCAGATCAGTTCAGTTCATCCACACC	3	37.1911	127	3	40.7575	127	3	34.3772	124
1104	RM16243	AGGAGAGGTGGCAGATGATGG	GTCGCCTAGAATAGATCACAAGAGC	3	37.1975	354	3	40.7794	348	3	34.3836	354
1105	RM16245	TGAAGAAGAAACAACAACCGCCTACC	GCGTAGTTAGTTGCATTGCATGTGG	3	37.1982	85	3	40.7805	75	3	34.3843	75
1106	RM16246	GTCGGTCCAGCATGACGTAGC	GAAGCGGATGCACTTGTACTGG	3	37.2172	187	3	40.7996	190	3	34.4032	181
1107	RM16247	CACCCACGAGTGAAGATTTGC	GAAGCGGATGCACTTGTACTGG	3	37.2173	117	3	40.7997	120	3	34.4033	117
1108	RM16249	TCAGTTCATCACTCGTTCGTTCG	GGTCAGAGGTGGTTGAGTTGAGG	3	37.2278	181	3	40.8182	181	3	34.4143	181
1109	RM16250	ACAACCACTCCTCTCGTCTCTCC	GCTTATTCGTCTGGGCTCATCG	3	37.2323	157	3	40.8227	169	3	34.4188	154

## Sheet: Chr 4
SL. No.	Marker Information			Oryza sativa ssp. japonica			Oryza sativa ssp. indica			Oryza rufipogon
	Marker Name	Forward Primer Sequences	Reverse Primer Sequences	Osaj_CHR	Osaj_Position (Mb)	Osaj_Exp. Amp. (bp)	Osai_CHR	Osai_Position (Mb)	Osai_Exp. Amp. (bp)	Oruf_CHR	Oruf_Position (Mb)	Oruf_Exp. Amp. (bp)
1	RM16251	GCATCATCTGCCTGATCTATTGG	CGTGCATGTAGCCAGATTACACC	4	0.048603	349	4	0.021099	341	4	0.00627	540
2	RM16256	GAAGGCGTGCTCCGAGAACTGG	GTCGATCGCCTTGTCGTCTGC	4	0.113208	314	4	0.110711	314	4	0.0727925	317
3	RM16260	TGCTAGTAGGAGAGGAGCGAAGC	ACTGTGAGTCGTGTCAGAGTTGG	4	0.167757	169	4	0.17293	161	4	0.127565	141
4	RM16261	CTCGCATCTGCACACTGTATTCG	GGGCAAGGATAAGTAGGTGGAAGC	4	0.167981	174	4	0.173146	171	4	0.127761	174
5	AUT16262	CTTACTCCATTGGGCTGGAACC	TGTAGGGTGGTAAGAGATCCACTCC	4	0.16872	185	4	0.17388	179	4	0.1285	183
6	RM16273	GCTTTCTGAACTACTTGCACTGG	GACACACATTGTCGAAGGAAGC	4	0.260909	728	4	0.262357	755	4	0.221597	725
7	RM16277	GGCTTTGCTTCGGTTTCGTTGC	CGCCTTGTTGTCCTCCATCTCC	4	0.311908	82	4	0.322821	79	4	0.26958	82
8	RM16278	AGTGATAAGCAAACGTACCCATCG	CCCTCGCCTGTAGCTATGAACG	4	0.32186	153	4	0.338504	139	4	0.279529	169
9	RM16280	ACGAAAGCAATGAAGGGCTTGG	ACCTCTCGCTTCCAATCTTCTGC	4	0.357536	186	4	0.383259	186	4	0.315918	186
10	RM16282	TCTTGTACCACCACCATCACACC	AGAGGAGCATCTGTGCTGAAAGC	4	0.404035	153	4	0.42617	141	4	0.359679	153
11	RM16284	ACACTGCTCGGGAGTTACTGACC	CAATAAGCAGGGCTACAACATGC	4	0.515032	291	4	0.604518	301	4	0.457074	395
12	RM335	GTACACACCCACATCGAGAAG	GCTCTATGCGAGTATCCATGG	4	0.689354	113	4	0.795297	152	4	0.634424	142
13	RM16294	CTCTAGCGATCTTCTCAATCCTTTGC	GAGCAGGTGAACCGACATTATTTACC	4	0.911677	387	4	1.00157	305	4	0.805982	297
14	RM16295	CTCTAGCGATCTTCTCAATCCTTTGC	GAGCAGGTGAACCGACATTATTTACC	4	0.911677	387	4	1.00157	305	4	0.805982	297
15	RM16296	GAACTTGATGAGCCACTGGATGAGG	TTGCGCGCACATACATACATACG	4	0.913801	243	4	1.00339	242	4	0.808016	253
16	RM16304	GCCACTGTCTATCCACCCAACC	GCCATGGTGATGGAGGAGAGC	4	1.09781	210	4	1.19816	210	4	0.960283	210
17	RM16335	AGCACGCGTGACATGAACTTCC	GAAGAGAGGCATGTGTTGTGTTGG	4	1.69917	143	4	1.67197	114	4	1.53507	143
18	RM16336	GCATGGCGAACAAAGTAAATGC	GAGTCGGGACGGAAATAAATTAGC	4	1.71912	568	4	1.71231	580	4	1.55567	593
19	RM16349	TGAGCCACACTAGCAGGACTACG	TGGCCTTCTGACAATTCAACTCC	4	1.89216	199	4	1.88176	189	4	1.7291	173
20	AUT16352	AAGACACAAGCAAACAGCTCAACC	AAGCTTGCTTGGTTCAAGAGAGG	4	2.02175	192	4	1.97215	184	4	1.83831	192
21	RM518	CTCTTCACTCACTCACCATGG	ATCCATCTGGAGCAAGCAAC	4	2.03454	170	4	1.97211	162	4	1.83827	170
22	RM16353	ACAAGTGATCACAATGGCTCTCC	CTTATGCTCTCATGGTAGTGTGTTGC	4	2.04816	257	4	1.9997	197	4	1.86377	199
23	RM16354	ACAAGTGATCACAATGGCTCTCC	CTTATGCTCTCATGGTAGTGTGTTGC	4	2.04816	257	4	1.9997	197	4	1.86377	199
24	RM16355	CCACTGAACAAGTGTTGTAGTTCTGC	CTAGCTGACCACATGCTTCATCC	4	2.04878	290	4	2.00024	310	4	1.86432	284
25	RM16368	TGTCCAGAGAATGACAAAGTACGC	GGATGTATATCTGCCACCAAATGC	4	2.44932	123	4	2.25134	119	4	2.12149	119
26	AUT16381	ACATCTCTCACCTCCTCCTACGC	CCTCGAATCGGAGGTCTTCTAGG	4	2.8134	197	4	2.21828	184	4	2.2827	184
27	RM16391	GCTAGCCACAGACTATTCAGACG	ACTAGAGGAACCAAGGCTGACG	4	3.21083	626	4	2.22938	626	4	2.57792	623
28	RM16393	CAATTGGTAACAAGTGGTCCATGC	CTTCAGGATATAACTGCGGTTTCG	4	3.41259	280	4	2.68461	167	4	2.68748	169
29	RM16416	ACGCATTCGCACGACTCTAACC	GGGTCATGCAACAATGGAGACG	4	4.18361	257	4	3.25449	242	4	3.24737	244
30	RM16423	GCAACTTACAGGAAAGGCAACAGC	TTAGGATGGATGGATGGCTTGC	4	4.28457	99	4	3.37373	95	4	3.36771	95
31	RM16424	ACTAATAGTGGTGGGTGCTGTTAGC	CCACTTTGCTGAGAGTGTGAAGC	4	4.29366	183	4	3.38287	175	4	3.37686	183
32	RM16426	AGAACACCATGTCCACCCACACC	AGCTCGCCAAGATGCTGATCG	4	4.35076	197	4	3.43858	194	4	3.47889	194
33	RM16427	CTCCTCATGTCGCTGATTCTTGG	CCGAGATCTACCTCTTGCTGTCC	4	4.35097	291	4	3.43879	276	4	3.4791	288
34	RM16428	AAAGGAAGCGCTCGATGATCC	CCGGCCATTATCTTTCTTCAGC	4	4.4126	155	4	3.49132	158	4	3.53445	158
35	RM16434	AGGCCATCCAACAAACTAGTCACC	GTCAGCTATTTAGGCTCCACTTGC	4	4.67283	152	4	3.72641	147	4	3.75523	154
36	AUT16435	CCGTGGAGAAGAAGCTGTAGACG	CTTCCCAACCTCAACCTCTCG	4	4.67421	123	4	3.72862	123	4	3.75662	114
37	RM16436	CTCCTGTGCACGTTCATGTGG	CACCTTCATCAGCAGCATCAGC	4	4.67438	172	4	3.72879	172	4	3.75678	172
38	RM16442	CAGAGAGAAAGAATGACGGTTTGC	GATCGAGGAAGGATAACAGTGAGC	4	4.73034	399	4	3.78658	430	4	3.81384	403
39	RM16443	CGTCGTCTTCATACTCCAAATGC	TCCCATCTAACCCATTCCTTTCC	4	4.73513	290	4	3.79139	284	4	3.81863	290
40	RM16445	GGGTGAATTGGACCAGGAGTACC	CAGTGTCCAAATTAGCGCATGG	4	4.76532	396	4	3.83189	366	4	3.84697	368
41	RM16458	AGAGGAGCGATGGGAGAGAGG	CTTGCGGACAACCTACATCTTCG	4	5.18207	344	4	6.70444	330	4	4.12455	728
42	RM16459	TCCAGGAGTTTGCCTTGTAGTGC	TAGCGAAGTCAGGATGGCATAGG	4	5.20637	190	4	6.66757	208	4	4.14928	160
43	RM16460	ATTGCACCATTCAAACGGAACC	TTCCAAGCTGTCTTTCTGACATGACC	4	5.34612	215	4	6.54493	197	4	4.26294	227
44	RM16464	CAGTGAAAGCTGCATAGGTTTGG	TCCTTCCATCTAGGTCCATTCTAAGG	4	5.59247	458	4	6.33651	450	4	4.45268	446
45	AUT16465	GTAGCACTCCGCTGCTTCGTCTCC	AATCCCACCCGCCTCATCTCC	4	5.6012	199	4	6.31899	196	4	4.46228	189
46	AUT16466	GGTACTACAAAGAAACCTGCATCG	TCCTAGCTCAAATGTGCTATCTGG	4	5.65199	149	4	6.26423	127	4	4.51195	147
47	AUT16467	GGTACTACAAAGAAACCTGCATCG	TCCTAGCTCAAATGTGCTATCTGG	4	5.65199	149	4	6.26423	127	4	4.51195	147
48	RM16492	GGAGCTCAGTAGAGATCAAACATGG	GCTTTCATGTGCTTTCCTCTCC	4	6.39685	417	4	5.60737	417	4	5.13043	393
49	RM16496	GATTGGGTGCTAGTGAGCGTAGG	TCTAGAACATGTGTGCGCTTTGC	4	6.50307	372	4	5.51607	384	4	5.23462	369
50	AUT16497	TGTGGAGGCTTAGGAAATTCTGG	TGTGAAACATGCCACGATACTGC	4	6.56923	250	4	5.46057	250	4	5.29756	220
51	RM16506	GCAGTAGACCTCGTGCTGAATGC	CCACACCGCCGCAATATAAACC	4	6.91936	129	4	3.98308	132	4	5.48382	127
52	RM16507	TTCACATCCATTCAGCGACATGC	GGGTGCTACATTCAGCATCAATCC	4	6.92915	295	4	3.99178	301	4	5.49358	287
53	RM16508	TTCATTGTCATCGCCTCATTGG	ACAGGTACAGCTGGGTAGAGAGAAGC	4	6.94687	188	4	4.00889	191	4	5.51542	189
54	RM16513	TGGAGTATGTTTGGATGGAAGC	TTTCTAGGTGTTCCCAACTCTCC	4	7.15077	479	4	4.1964	405	4	5.61938	410
55	RM16514	GGCTACGTCAGGATGGAGAGG	GGATGTTACATGTCAGCTTGAGAGC	4	7.24393	370	4	4.37064	373	4	5.69721	377
56	RM16541	AGGGCCTTTCACAACCTCTACC	ACCTGAGCATTATCACCACAGC	4	8.21489	520	4	5.13516	520	4	6.51006	520
57	RM16556	TTGGACCAGGAGATCAATGAAGG	GTGCGCACACTCTTCTATGTGC	4	8.92106	392	4	10.742	202	4	7.06682	396
58	RM16558	TTTGACGAGAAACAGTAGGAGAGG	TGGAGGATTGGTTTCAAAGAGG	4	9.34892	213	4	7.03031	208	4	7.33221	212
59	RM16559	CCTGGAACCTGGAGGTGTTCTCG	GTCGTGGACGATTTCTTCGTCAGC	4	9.39905	197	4	7.11349	197	4	7.37413	197
60	RM16580	ATGTGCAACTTATGGGTGATGG	CACAACTCCGAGGAAGTCAGC	4	10.796	457	4	8.30993	463	4	8.63594	457
61	RM16583	GCAGGGACAGTGGTGGTAAGG	AATGAGGAGGAAGAAGAGTGTGTAGG	4	10.9831	156	4	8.49278	172	4	8.80014	238
62	RM16592	CTTAGCACGGACACTCATATTTGG	CACAATACGTTTGATGGCTTGC	4	11.3589	393	4	8.93829	317	4	9.13176	557
63	RM16593	CTTAGCACGGACACTCATATTTGG	CACAATACGTTTGATGGCTTGC	4	11.3589	393	4	8.93829	317	4	9.13176	557
64	RM16594	GTAGGTTTGGGTCCTTAAATGC	CATCTTCCCTCAATCTCTTTCG	4	11.3873	480	4	8.96409	450	4	9.1608	468
65	RM16602	CTCCACATTGGTTTGGTGTGG	GGAGGAATTTGCTCAACATGTGC	4	11.472	292	4	9.12587	292	4	9.23986	292
66	RM16604	CGGTACATAATATACGGTCAGGATGC	TGGGTATTGCCTAACTGCTTTCC	4	11.5183	204	4	9.20979	212	4	9.27811	200
67	RM16605	CATGGTGGGACTCACATATACC	AAGAACTGTGCTGCAGATAACC	4	11.53	134	4	9.20584	134	4	9.28982	134
68	RM16610	ACTTCCGCTCCGACACTTCAGC	AAGAGAAAGGAGGCAGCAATACCG	4	11.7243	412	4	9.46747	408	4	9.44546	412
69	RM16612	CCAGTGACCCAATATATGGAAACC	CGTTGACGAGAGAGGAAGAGAGG	4	11.8129	138	4	9.58319	135	4	9.52765	138
70	RM16616	TAGGCACTGGGCTCAAGTAGTGG	TTCTCATCCTTCGCCATCTAACC	4	12.0961	199	4	9.881	161	4	9.70304	185
71	RGNMS1435	CAGTGCTGTAACAACCATATTC	TGTTTGCCAACACATACATATT	4	12.0962	267	4	9.88105	229	4	9.70309	253
72	RM16618	ACCGAACCATGACAGTGAACAGC	CTAGGTGCGCCAGAAGTCATCC	4	12.2629	238	4	10.0485	244	4	9.81231	240
73	RM16619	AATTGACACCGGCACTATTTGC	GTATTTCCTGGAGTGGTGTACCTACC	4	12.2683	375	4	10.0539	366	4	9.81768	371
74	RM16626	ACATGATTGCTGGCTTGCTTACC	GCCACGCAGTGTTGTTTCAGC	4	12.7746	181	4	10.6344	171	4	10.3422	173
75	RM401	TGGAACAGATAGGGTGTAAGGG	CCGTTCACAACACTATACAAGC	4	13.1635	283	4	11.1151	303	4	10.5628	219
76	RM16634	GCATCGCATGTATGTCTGGTAGC	CCTCAAGCTCCAGCTCTCCTACG	4	13.2711	330	4	11.1957	331	4	10.6184	330
77	RM16649	CTCCCTTCATGCGTAAGCTCTCC	GCAAACAGGATCCTCCACAAAGG	4	13.6204	341	4	11.6497	247	4	10.9581	221
78	RM16653	TGAAGCACCTCATGTTTGACTAGC	CATGTGGTTTCATCACTAGGGTTAGC	4	13.656	160	4	11.6747	142	4	10.9934	158
79	RM16654	GAGCACCACCAGATGAGATCG	AGGTGAAGTTCCAGCTTCCAAGG	4	13.6748	281	4	11.6935	281	4	11.0122	281
80	RM16655	CCTTGGAAGCTGGAACTTCACC	GGCTCTTAGGTTAGATCCCACACG	4	13.6751	138	4	11.6938	138	4	11.0125	138
81	AUT16656	AACAGCAACCTGACAGAAGAATGG	TATGTGGCTTCTCGTTGAGTTGG	4	13.7045	150	4	11.7139	150	4	11.0289	144
82	RGNMS1587b	TAAGGAAGTGGATAGGGTAATG	CTATTTATCAGCGAAGGTGTAG	4	13.7046	392	4	11.7139	392	4	11.029	386
83	RGNMS1662	GAAGAAGTGGTAGACCAGTAGC	AGGCAAAGATACCTAAACAGAA	4	13.7046	229	4	11.714	229	4	11.029	223
84	RGNMS1673	ATCAAAGTTGTCAGAGTTCCTT	CTCTAGGAACTTAATTAGTGGCA	4	13.7253	313	4	11.7386	385	4	11.0493	313
85	AUT16661	TGTTGAAGGAGATACACCGAAACC	TAGGATGTTAAAGCGCCACTTGC	4	13.8232	261	4	11.8442	212	4	11.1238	287
86	AUT16662	TGTTGAAGGAGATACACCGAAACC	TAGGATGTTAAAGCGCCACTTGC	4	13.8232	261	4	11.8442	212	4	11.1238	287
87	RM7279	TGTTGAAGGAGATACACCGAAACC	TAGGATGTTAAAGCGCCACTTGC	4	13.8232	261	4	11.8442	212	4	11.1238	287
88	RM16667	CCTCTCCTCTTTCACTGACATCACC	CACCACCAACAAACAGTCAAACC	4	13.8848	308	4	11.9343	344	4	11.1808	308
89	RM16670	TGAACTCGAGTGAAAGATGAGG	CTACAAGGAAACCTCCCTATTTGG	4	13.9334	176	4	11.986	135	4	11.2174	164
90	RM16672	CTGATCCAGCGGTGATGATGG	CTGCAGCTGTCCTCCCTTAGCC	4	14.0151	69	4	12.0986	69	4	11.2943	69
91	RM16676	TACATTTCTGCTTCCTGCGTAGC	AACTTGAATATGCCACCCTTGC	4	14.3458	198	4	12.3257	196	4	11.9883	196
92	RM16700	AACTTGAATATGCCACCCTTGC	TACATTTCTGCTTCCTGCGTAGC	4	14.346	198	4	12.3255	196	4	11.9881	196
93	RM16720	CAAACCCTAGCGTTGATCTTTGC	GAGTCCGGAGTCCTCTCCTTCC	4	15.8859	182	4	13.1609	186	4	12.3646	186
94	RM16724	TGTAGTGTGGTAGTCTGATCGTTGC	TTCTAGAAGCCCTATGCCTTATCC	4	16.0892	81	4	13.411	81	4	12.575	81
95	RM16735	GGAAGAGACCGCGAGAGACACG	CGGCGACTCACCTAGGATCATGC	4	16.4705	262	4	13.8559	262	4	12.875	262
96	RGNMS1583	CTTCTTGGTTTCTTTCATCTTC	AAATCTCTACTGCACACAATGA	4	16.5164	339	4	13.8918	339	4	12.9096	339
97	RGNMS1668	CTTCTTGGTTTCTTTCATCTTC	AAATCTCTACTGCACACAATGA	4	16.5164	339	4	13.8918	339	4	12.9096	339
98	RM16737	TCATCTTCCTGTTTGGGAGAGG	CTCCTCTGATGGAGACAAGAAGG	4	16.5164	273	4	13.8918	273	4	12.9097	273
99	RM16739	TGCATAGTCCACCTAAGAGTTCAAGG	TTTCTGCAGGCTGATTAGTGTAGG	4	16.6532	354	4	14.0888	344	4	13.1028	336
100	RM16746	GGACTCTCTACCTCGACCACTCC	GGCCGTACAAGTGCTGTAGCC	4	16.8285	295	4	14.2632	295	4	13.2677	301
101	RM16758	ATCCAGCCGATTACAGTGAGAGC	TCATAGGGAGAGGAGGCACAGTAGG	4	17.1006	588	4	14.5218	588	4	13.4509	588
102	RM16760	GTCCTCCCAACAACGCTCTCC	ACCCTGTTAAACGGCTGAGTCC	4	17.1212	288	4	14.5861	228	4	13.4713	274
103	RM16761	GTCCTCCCAACAACGCTCTCC	ACCCTGTTAAACGGCTGAGTCC	4	17.1212	288	4	14.5861	228	4	13.4713	274
104	RM16763	TTCTTGAGCCTCCTTCATCATCC	CGCTGAGATAGGGTTAGGTGAGG	4	17.2187	99	4	14.6457	97	4	13.5581	97
105	RM16769	GCCTTTGCATGGTTACACATAGG	CAAGTCTACAAGATAGGTGGATCAGC	4	17.4885	471	4	14.9211	450	4	13.7937	449
106	RM16782	ATGTCTACGTCGCCGCACTTCC	AAATCCATGGCGTTCCAGTTCC	4	17.9306	163	4	15.336	160	4	14.1012	163
107	RM16794	CCTCTGCTCCTCGCTACTCTGC	GCCAGTGATCGTTAGTCCAATCC	4	18.2417	187	4	15.6817	185	4	14.475	187
108	AUT16800	AGTCATGCTGTGGTTTGTCAAGG	GAACGAAAGCCAGCAATACATACC	4	18.3509	378	4	15.799	390	4	14.571	363
109	RM16801	CGTTCAAGGAGCTTGTGTTGATCC	GGACCGATTTAAGTGAACGTTGATGG	4	18.3513	454	4	15.7994	427	4	14.5713	409
110	RM16814	TTCCACAACCCTTGTATGTGTGC	GTGCATGAGAAGAGGATAGATGTGG	4	18.4443	285	4	15.8701	280	4	14.6675	280
111	RM16816	AACCACCACAGCCTCGCTTTGC	TTCCACCTCTTCTCACGTCGTTGG	4	18.5531	259	4	15.9956	259	4	14.7644	245
112	RM16818	CACCCTACCAAACCAAGATCACG	AGGTGACCGGATCCCTCTAGTCC	4	18.5851	78	4	16.0417	78	4	14.7971	78
113	RM16824	CTTCCAGGGCCTCTTCCACACC	GGGAGCTTCCGCTTCTTGTTGC	4	18.757	360	4	16.3163	1130	4	15.0028	335
114	RM16825	AACTAAACACACCCTGAACAGC	ATGTAGTACCCAAAGCACAACG	4	18.7601	282	4	16.3203	1126	4	15.006	288
115	RM16832	TAATCCAGCCGTCCGTTTCTTGC	TTGTGTTTCATTATGGCGCTACGG	4	18.9345	407	4	16.4886	458	4	15.1957	424
116	RM16835	CATTGCCAACCCGTAAAGCTACC	GGTGAGCTGAAGATGTTCTTTCATGG	4	18.9958	126	4	16.5536	126	4	15.2495	120
117	RM16837	CCCATAGTATAGGAGGTTTGTCC	CACCAATAGAAGTGATCTCAGG	4	19.0019	210	4	16.5597	217	4	15.2555	228
118	RM16842	AGAGCAGAGGCCACACCATACC	CAAAGCTGCTACTGTTTGTGTTCG	4	19.0818	98	4	16.64	98	4	15.3377	98
119	RM16844	CACCGACTGGTTCGTCTACAGG	GAGAAGATATGCAGGTGGAACTGG	4	19.1058	230	4	16.6646	230	4	15.3539	230
120	RM16845	CTACAAGCAACACAGTATCACAGC	GGTAACTGGTGCTTATTTAGCC	4	19.1366	255	4	16.6953	303	4	15.38	253
121	RM16846	CTACAAGCAACACAGTATCACAGC	GGTAACTGGTGCTTATTTAGCC	4	19.1366	255	4	16.6953	303	4	15.38	253
122	RM16848	AGAAGCTCTCCGATCTCGTCTCG	TCACTGAAGCTGAGTTTGTGAGACC	4	19.1505	378	4	16.7093	378	4	15.3939	375
123	AUT16851	CCTCACGCCACTGACATCTGG	GGGAGGAGAGGTGAGGAAGAGAGC	4	19.1966	271	4	16.762	277	4	15.4156	257
124	RM16852	GTAGCCTTGCACTCGACCGTACC	ACCAACTCTGGCAATGCATCC	4	19.2047	96	4	16.7701	92	4	15.4236	78
125	RM16854	TCGTAGATCGACTCGTAGTCGTAGG	AGAGAGGGAGTATAACGGAATGACG	4	19.2326	349	4	16.799	320	4	15.4514	331
126	RM16858	ACGATAACGGCTCTGTTTCTTCG	CGTATCTCGTGGTTGCAGATCG	4	19.3141	121	4	16.8976	118	4	15.5627	121
127	RM16859	GTTGCGGATAACTTCCTGAACG	ACCGTGAAGACTCGTTGCTTCC	4	19.3351	403	4	16.9173	403	4	15.5834	403
128	RM16860	AGTCGAGGATCTTCGGACAGC	ACGAAGAAGATCCCTGATTCTGC	4	19.3445	212	4	16.9306	212	4	15.5928	212
129	RM16861	ATTGTGGTCGTCGTCATCAACC	TTGCTCAGATACCTCGGCTTCG	4	19.3922	138	4	17.0053	138	4	15.6382	129
130	RM16862	GAGTTCTCTCGCTCACCGAAGC	GTCGAACTCGACGTAGGAGACG	4	19.3946	394	4	17.0078	385	4	15.6407	394
131	RM16863	CCCAAACACGGTGTGGTCTGC	AACCCTAGCCACCGCGTCTTCC	4	19.3994	243	4	17.032	240	4	15.6458	245
132	RM16864	CACCTCCTTTATGAGGCAGACAATGC	GCTCATCAGCCTCAACTCTGTCACC	4	19.4011	255	4	17.0144	253	4	15.6475	255
133	RM16867	GGAACGTAGCTGAAGTCATGAACC	ATGAGCCTTGCTTGCTGTAGTCC	4	19.4646	128	4	17.1407	122	4	15.7079	126
134	RM16872	TCCTAGTATAGATCCACAGCAACC	ACTCCATCAAATGACCTAGAGC	4	19.4948	95	4	17.1723	93	4	15.7373	95
135	RM16873	GCATATGCATGCAGGAATTGACC	TGCACTCCAGCATTAAAGAACAGG	4	19.4982	443	4	17.1757	489	4	15.7407	460
136	RM16874	TAGCAAGCTTGGAGAAGTGATGG	CAGAAGAAGTCAGCTCTATGCTTGG	4	19.4987	156	4	17.1763	140	4	15.7413	144
137	RM16876	CTATACGAAGGGTGAGCGTGTGC	AAGTTGCCTATACCACACCAATGC	4	19.5062	229	4	17.1837	275	4	15.7487	237
138	RM16877	ATGTGGCACTGATTTCTCTTCC	CCCTACTACACCTGTTTGTTTGG	4	19.5171	380	4	17.2119	378	4	15.7597	364
139	RM16880	CCATGTAGAGACAATGCTGATCC	TGCTAGCTGGAGTAGACATATAGTGC	4	19.5422	158	4	17.2419	156	4	15.7846	652
140	RM16882	GCAGCTATCAGCACAAATCAAGG	GCCGTACAACTACTACATGGTAAAGC	4	19.5445	194	4	17.2442	198	4	15.7874	194
141	RM16883	TGCCATGATATGATTCCTGTGG	GGTCCTATTACAAGCATGCAGTCC	4	19.5474	488	4	17.2472	450	4	15.7903	462
142	RM16887	GTGTGAGTGACAACACACAAAGC	GAAGCTCTTGTCAAGTGGTGAGG	4	19.5871	155	4	17.2972	161	4	15.8296	155
143	RM16888	AGGGAATTCCAGCAAAGGAACC	GTTGCATTGCATAGCGACTCAGG	4	19.592	97	4	17.3021	97	4	15.8345	97
144	AUT16889	TTGCCACCTATCCTTATCTCACC	CTCGGCGAAGTAGTAGAAGAGC	4	19.6129	297	4	17.3233	295	4	15.8569	299
145	RM16890	GGAATCGAGATTCTGACAACC	TACTGACTACTGAGTGAGCTTGC	4	19.615	276	4	17.3254	267	4	15.859	276
146	RM16893	CGGAGTAAGCAGGAGGAGTTCG	TTTAACCCTCTCACCTCTCGATCC	4	19.6318	178	4	17.3456	178	4	15.8757	178
147	AUT16898	CAATCACAGAGCAACACGTACCC	GCAGAGGCAGCTGAGAAGTATAGC	4	19.6561	152	4	17.3697	158	4	15.9001	146
148	RM16903	TTCTCCTCCTCCTGCTACACTGC	GCATACACAAGAGCACCGAGAGG	4	19.6872	483	4	17.4038	509	4	15.9337	484
149	RM16905	CAGACATTTGGCTAAGTGGCTAGG	AATTGTCCACCCATGGATCTGG	4	19.7219	378	4	17.4406	341	4	15.9685	374
150	RM16906	AAGGAGAGTTCGCCGAGGACACC	AAGACGAGGTCGGCTCGATTGG	4	19.7572	294	4	17.4846	288	4	15.9924	294
151	RM16907	GTCGTCGTCGAAGAAGAAAGAGG	GATGGCGCTAGATGTTGTTTGG	4	19.7572	251	4	17.4847	245	4	15.9925	251
152	RM16909	CATAACCAGTTTGGACCCATGC	TTGATCACATCCATGAGCAACC	4	19.8026	189	4	17.5157	183	4	16.0278	185
153	RM16911	CCTGTCTGTCTCTCGATCATGC	TAATCCTTTCAGCGATCCTTGC	4	19.8094	283	4	17.4713	283	4	16.0346	283
154	RM16913	GTGTACGTGTTGGCTCTCTGTACG	GATGTTGCTTGTGCTGCAACC	4	19.8394	391	4	17.5532	392	4	16.0627	311
155	RM16914	TTTAAAGAAGCCCTCCTCCTTAGC	ACAGGGACGAGGAAGAAGAAGC	4	19.9076	94	4	17.6291	94	4	16.127	82
156	AUT16920	GCTAGATTAGGCTCCCTGCAACG	GATTGAGTGCAGCCTCATAACACC	4	19.9504	175	4	17.6736	171	4	16.1691	169
157	RM16921	GTCTCGAAGCAGCACGAGTGG	CCCTGTTTGTGTTTGGTGAGTGG	4	19.9622	399	4	17.6855	396	4	16.181	209
158	RM16922	CCACGTTGCCATCACGTTAAGC	TGTCGATCACACGTCAACATGG	4	19.9743	278	4	17.6973	265	4	16.1929	272
159	RM16925	GTGGCACGTACTGCTTCTACTGG	CCACCACCCTGTACACATGACC	4	20.0138	193	4	17.7504	191	4	16.2321	193
160	RM1359	AACGAATTCTATTTTGCGTC	TTCTTCTCATTTCAATTCGC	4	20.0325	170	4	17.7902	150	4	16.2729	146
161	RM16930	CGCGTACCAGTACGGTGATCC	CTTGGGACTGATTGATCGATGG	4	20.1122	267	4	17.8578	282	4	16.3262	267
162	AUT16931	GCTAAGCTAATCTGACCGGATCTACG	GATGGGCCGATTAACAAATTCC	4	20.1411	93	4	17.8947	91	4	16.355	75
163	AUT16932	GCTCGTTTCTCTCGATCACTCG	GCAAGGTTGGATCAGTCATTTCG	4	20.1436	141	4	17.8969	98	4	16.3574	138
164	AUT16933	GCTCGTTTCTCTCGATCACTCG	GCAAGGTTGGATCAGTCATTTCG	4	20.1436	141	4	17.8969	98	4	16.3574	138
165	RM16936	CGACGATCTGGAACAATCTCAGC	ACAGATCAAGCGATCTTGGATGC	4	20.2027	149	4	17.9688	149	4	16.4302	149
166	RM16937	TCTTCCCATCGAAATCTGTCACG	TCGGTGCTCTTCAGGAGGAAGG	4	20.2654	184	4	18.0302	174	4	16.4859	200
167	RM16940	TGGAGTTTCTTCTCCTCCCACTCG	CAGAGAGCTAACGCCGGAGAGACC	4	20.3613	185	4	18.1558	199	4	16.5898	195
168	RM16941	GGCTCCTCTCTTCTCCCACTCC	ACACGAGCCTGAAGAAAGACACG	4	20.3708	202	4	18.1641	208	4	16.5981	198
169	RM16942	CCAGTACTCTCGCTCCACTCTCC	ATCGCTTTCACGTCACCAAGG	4	20.388	181	4	18.1909	175	4	16.6153	181
170	RM16943	CTCCATGCGGTGACCATGTTAGG	GATGAGCAGGAGCAGAGGAGAGG	4	20.4441	386	4	18.2501	424	4	16.6702	350
171	RM16944	CACTCACCATATACAGGCAGAGC	GACACAGTGACCTTAGTCGTAGGC	4	20.461	391	4	18.267	394	4	16.6881	361
172	RM16945	AGCCTGAGCCTGAATTTGAACG	AAAGATGTGTGCTGCCAAGAGG	4	20.4867	261	4	18.3009	267	4	16.7139	257
173	AUT16947	GACAGGGAGTGTGGCAACTATGC	GATCACAGACAATCATGGGTTGG	4	20.5385	134	4	18.3613	148	4	16.7639	128
174	RM16948	GGTTGTGGACGGCATAAATTGG	CCTGAAATCGATGATGCACTCC	4	20.5454	497	4	18.3683	485	4	16.7708	489
175	AUT16952	TAAAGGTGTCCGACAAGAACACG	GATCGATCTGGAGGATTGAAAGG	4	20.6218	198	4	18.4552	200	4	16.848	196
176	AUT16953	GAGGTGCCGTTCTACAGCATTCC	AACATGAGGCAGGCAGAGTGG	4	20.6466	193	4	18.5052	181	4	16.8721	199
177	AUT16954	GAGGTGCCGTTCTACAGCATTCC	AACATGAGGCAGGCAGAGTGG	4	20.6466	193	4	18.5052	181	4	16.8721	199
178	RM16956	CCAAATCTATAGCTCTCCTTCTCC	ATACCAACTCTCCCAAGAACTCC	4	20.6836	384	4	18.5385	378	4	16.9063	384
179	RM16957	AAAGGCCTCAAAGTCTACAACAGAGC	TACACGTCTCCGTCCAACAGTCC	4	20.6914	113	4	18.5561	110	4	16.9142	113
180	AUT16960	TCTTCCTCTCCACTTCCATTTCC	AAGAAGCTCGGGATCTTCACC	4	20.7132	187	4	18.5716	187	4	16.9302	187
181	RM142	CTCGCTATCGCCATCGCCATCG	TCGAGCCATCGCTGGATGGAGG	4	20.7132	238	4	18.5716	238	4	16.9302	238
182	RM5979	TGCTGGACCTCACTGTTCTG	ACGTGGCTCAATCAGGAAAC	4	20.7719	169	4	18.6375	151	4	16.9969	172
183	AUT16962	GTTTGAACTCTGGTCTCAATGC	ACAGTATACGTGGCTCAATCAGG	4	20.7942	195	4	18.6376	177	4	16.9969	198
184	AUT16963	GCGTAAGACGACGAGACCTTACC	TGATGACGTGGCTTTCATTTGG	4	20.8533	169	4	18.6968	159	4	17.0305	157
185	AUT16965	TCGCGTCGTAGCTGAACACTGC	TAGCTTGCTCTCCCTCTGCTTGC	4	20.9033	168	4	18.7637	176	4	17.0885	171
186	RM16972	CACGTTAGCCGTACATGTGTATTCC	GGTCCTGGATAAAGCCTCAGTAGC	4	20.9602	378	4	18.8779	377	4	17.1447	395
187	RM16973	CACGTTAGCCGTACATGTGTATTCC	GGTCCTGGATAAAGCCTCAGTAGC	4	20.9602	378	4	18.8779	377	4	17.1447	395
188	RM16974	GCAGTTGGCCGTTAACCTTTGC	CGATCCACCATGCAAGCATCC	4	20.9608	333	4	18.8784	321	4	17.1453	329
189	RM6997	CAACGCGGCAGTAAATTTGC	GGCCTTGTCAGTCTACATGC	4	21.2729	153	4	19.1774	153	4	17.3523	168
190	RGNMS1475	CTTTCTCTCCTCCCTCTAATCT	GAAGAGGAGAGGATTTATGACA	4	21.3454	283	4	19.2308	283	4	17.4028	283
191	RGNMS1640	CTTTCTCTCCTCCCTCTAATCT	GAAGAGGAGAGGATTTATGACA	4	21.3454	283	4	19.2308	283	4	17.4028	283
192	AUT16996	AGGAGGAAGGCCTGCTGATGG	AGAAGAAGAAGAGCGCGAAGAAGG	4	21.3736	134	4	19.2619	134	4	17.4302	125
193	RM16997	CCACGAACTAAATCATCACTCC	TCCGAACAGTTGAGAAGTAGTAGC	4	21.4014	329	4	19.2897	329	4	17.458	317
194	RM16998	CGATTCGAACCGAGATGGATGC	CATGGAACCGTGGCTGTTTGG	4	21.4274	337	4	19.3404	328	4	17.4839	328
195	RM17004	GTTATGCCTGGTCCCGTCTGACC	TCTTGACGTACACGCTGATGATGC	4	21.4486	261	4	19.3701	260	4	17.5058	229
196	RM17005	GCCACCTCCATCTCGTACACC	CACGTGAACACCACCACTCTCC	4	21.4781	147	4	19.3994	147	4	17.5352	147
197	RM17006	AGTCGACGAAGAGGTAGTCGATGG	CTCCTCCTGCTGCTCTCCTTCC	4	21.487	135	4	0.443721	135	4	17.5441	138
198	RM17007	CTTCCCACGCGAAACTTCATGG	TCCGGCCAAGACAATATCAACG	4	21.4988	342	4	19.4514	357	4	17.5558	327
199	RM17010	CCGCGACCTCTCTACTCGACTACTCC	GAGAAGGGAGCGAACGGGAAGG	4	21.5477	293	4	19.4819	293	4	17.6015	296
200	RM17011	CCGCGACCTCTCTACTCGACTACTCC	GAGAAGGGAGCGAACGGGAAGG	4	21.5477	293	4	19.4819	293	4	17.6015	296
201	AUT17014	GAAGGCACTTCACTCACTCTGC	AGAGTACCACCCAACATCCATCC	4	21.5896	243	4	19.4405	233	4	17.6446	251
202	RM17015	TGACAGTGTGTCTGGCTGTCTAGC	CTGGATGCACAACCACAAGAACC	4	21.6231	236	4	19.5537	236	4	17.6621	236
203	RM17016	CTCCTTCATCATTCTCACCAGAGG	CAACTTCAATCTTGTCAGCAGTCG	4	21.6392	215	4	16.7545	215	4	17.6773	209
204	RM17017	ACGCGAGTAAGTGAGGCAACG	GTCTCGCTACGACTTGGGAGAGG	4	21.6946	113	4	19.6263	113	4	17.7328	113
205	RM17018	AAGCAAGCAACACCCGACTCC	CCTAGCCCAAATAACTCAGACATGC	4	21.6964	395	4	19.6281	415	4	17.7346	395
206	RM17019	AGCACACACGACTCTACCACAGC	GGGCCATGTAACAGACATACTACTCC	4	21.7131	352	4	19.6883	295	4	17.7539	318
207	RM17020	GGACGACTTCACCTTCCCTATAACC	CAGGAGGAAGGGAACCAGAGC	4	21.715	170	4	19.6901	170	4	17.7557	170
208	RM17022	TCAGATGATGTTGGGTTACTCG	CACCTCCGTTTCTTTATGTACGG	4	21.7456	209	4	19.7211	211	4	17.7905	201
209	RM17024	AAATGACCATCCTTCCGTTGAGAGC	ATCATGTCGTGCGCGAGAGAGC	4	21.7918	272	4	19.7701	272	4	17.8362	272
210	RM17025	CGATGGTGGTAGCAGGTGAGG	GCCCTTCAGCTCAAACAGATATGG	4	21.7927	187	4	19.771	180	4	17.8372	130
211	RM17029	ATCGGGACGACCACTATCACC	ACAGTTACAGATCAGGCCTACACG	4	21.8081	299	4	19.7836	290	4	17.8497	249
212	RM17030	CTTTCTCCAAGTACAGAACAGC	TTCCTGAATCCTGACTAAGACC	4	21.8214	294	4	19.7969	344	4	17.8629	274
213	RM17033	GAACCCAATCCCTAGCTACAGACC	GGTACGACTGGTCGTGCTTCC	4	21.9264	158	4	19.9032	158	4	17.9635	150
214	AUT17034	GGGAAGAGGAAGAGAGGAGAGAGC	GTGCTGAGAAGCCTGAGATTTGG	4	21.927	268	4	19.9038	268	4	17.9641	264
215	RM17036	CTTGAGGTGGGACAGGATGTCG	CGCTACCGAAGCTAAACAAGATGG	4	21.931	249	4	19.9078	249	4	17.9681	249
216	RM17037	TGATGATCAGCTCCTGTTTGG	CACAACATGCTGATTAGTCTCTCC	4	21.956	235	4	20.0725	235	4	17.9818	229
217	RM17039	CCTGCTACGTTCGTCTCCAAGG	TCAGCGTGATCAACTTCTTCTGC	4	21.993	373	4	20.1326	373	4	18.0186	392
218	RGNMS1486	TTATAATTCTATGCGACTGAAA	TTCTTCATTTCTTGCCACTATT	4	21.9932	127	4	20.1328	127	4	18.0188	147
219	RM17040	TGATGGGTCAGCATCATGTGG	CTCCTTCGTGTGTTCCTTCTGG	4	22.0091	399	4	20.1487	399	4	18.0346	399
220	RM17041	GTTGCTGCTGCTAGCTGTTTCG	AAAGCAAACCTACGCACACACG	4	22.0277	171	4	20.1668	169	4	18.0538	165
221	RM17043	TTGGAAGCCATGGAAGAAGAAGAAGC	CATTCCACGGTCAGTCATCTCAGC	4	22.0493	176	4	20.1884	179	4	18.0754	182
222	RM17044	TCCTCTCCTCTCACCATTTGACC	GCCACAAGATTTAGGGTGATTTGC	4	22.0603	206	4	20.1996	180	4	18.0864	188
223	RM17052	TAGCGAGGATAGGCTCATTACG	GGATTTGGAGATGCACTGTAGC	4	22.2416	392	4	20.2515	397	4	18.173	395
224	RM17053	CTCCCTTTGCTTGCATCTGTAGC	CGAGCATACTGCATACGACTTACG	4	22.257	242	4	20.3212	242	4	18.2936	240
225	RGNMS1447	TCTATATGCTGCTGACTAGCTG	TCTGTAAGAATGAGTCAGACGA	4	22.2571	190	4	20.3214	190	4	18.2937	188
226	RM17056	GTGAAACGAGAGAAGTGAAGTTGG	CCCACAACTGTGTTTACTATGAGACG	4	22.2795	186	4	20.3671	187	4	18.3161	168
227	RM17057	GTGATTGCCACCAACCTGACG	GGTTACAGGATGAGGACGATCAGC	4	22.305	376	4	20.4037	364	4	18.3405	376
228	RM17059	AAATGTTGGCTAGGGAGTAGTGC	GGCAATGATCTCTCAACTCACC	4	22.3138	193	4	20.4115	190	4	18.3492	193
229	RM17063	ACGGAGACCGACCCAAGTAAGC	CCACAGGTCAAGATGGAACAGC	4	22.7039	370	4	20.5085	379	4	18.4411	349
230	RM17064	CAGGCAAGTCAACAAACACTTCC	GTTGCTGTCGCTGAATTTATGG	4	22.705	83	4	20.5097	86	4	18.4422	83
231	RM17066	AGTCATTGCAGTGGAGGAGACG	GGTCGGGATCTGAGGAGAGAGG	4	22.792	353	4	20.6046	355	4	18.53	353
232	RM17068	CCGTACAGGGAGGTGGTGAAGC	GTCCTCGTCGCTGTCGTCTTCC	4	22.8344	344	4	20.6556	341	4	18.5725	300
233	RM17069	CTCGAGACCTTCAGGCAAGACG	GGAACGCCAAGAAGAAGAAGAGG	4	22.8409	284	4	20.6621	284	4	18.579	281
234	RM17070	ACTGGATCAGCTTGTGGCATGG	ATGATCCTCCTCGTCGTGATCG	4	22.8413	493	4	20.6624	493	4	18.5793	493
235	RM3524	CGGAGCTGGTCTAGCCATC	GTCTCCGTCTTCCTCACTCG	4	22.8938	128	4	20.737	108	4	18.6539	90
236	RM17075	CCAGATCCAAAGGTGGTGTCG	GAAGATGCAAGGAACCAAAGTGC	4	22.9643	187	4	20.7772	175	4	18.6858	181
237	RM17076	ACTTTCGAGTTGGCTGTTGATGC	CAGCAAGTTCAGAGTTTGCAAGG	4	22.9882	329	4	20.8011	325	4	18.7093	331
238	RM17078	CGACGATATCCGTGCATCACC	ACGATTGCATCTGCGTCACACC	4	23.0163	133	4	20.8211	133	4	18.7341	139
239	RM17079	GTGTGAATCTGGACATACCCTAAGC	TTTCTTCCTCCTCATCTGGTTGC	4	23.0326	674	4	20.8374	529	4	18.7514	616
240	AUT17083	AAGCGGCTTCAGCACAAGATGAGC	GTAGAGCTTCATCAGCTCGTCGATGG	4	23.2334	299	4	20.9539	299	4	18.8953	290
241	RM17084	CCCTACCATAGACATTGGTGTCG	TGGCAGATTGTGTTGCTAGTTCC	4	23.2385	626	4	20.9701	624	4	18.9004	624
242	RM17086	TGACTACACCGGATTGTACGCTACC	GCTGGTGCTCCTCCTCTTAGCC	4	23.2588	368	4	20.9913	365	4	18.9198	365
243	AUT17088	CTGTCTCCGTCTTCCTCACTCG	TGGAGAAATCTCCCTTCCTGAGC	4	23.2923	250	4	21.0371	231	4	18.9539	213
244	RGNMS1661	ATTTCTAGCAGTAAGTTGGCAT	ACTGACTGCATCATAATCTTCA	4	23.3588	233	4	21.1284	233	4	19.0201	231
245	RM17089	CTGAGCTGTTCATGCTTCCAACC	AGATCATCAGGATGGACTGACTGC	4	23.3588	192	4	21.1284	192	4	19.0201	190
246	RM17090	GTCGTCCAAGGTACACGAACG	ACAACACCCACTCGTTCTACGC	4	23.3942	146	4	21.1638	146	4	19.0548	146
247	AUT17092	TATCGACGACGGCTGTTGAGAGG	GTTGGTTGGACCTTGGGTCTGG	4	23.4166	337	4	21.1864	327	4	19.0699	361
248	AUT17093	TATCGACGACGGCTGTTGAGAGG	GTTGGTTGGACCTTGGGTCTGG	4	23.4166	337	4	21.1864	327	4	19.0699	361
249	AUT17094	CCTCTCCTCTATTTATGCCTCTACGC	GGCTCTCTGCGAGTGACTAATGC	4	23.4225	138	4	21.1928	138	4	19.0761	134
250	RM17095	CTGGAACACGCACCTAAAGAAGC	TCAAGGAGCCTTCGAGGAGTAGG	4	23.4242	538	4	21.1945	538	4	19.0778	547
251	RM17097	GGGAGCTTTCTCCTTCAAGAGC	GCGAGAGCACAGATAGAAATGG	4	23.4388	99	4	21.2091	103	4	19.0925	97
252	RM17101	GCATGTGGTGGTACGCACTCG	GCAGTAGAGTGCAGGGCAGATCG	4	23.517	198	4	21.3943	198	4	19.1496	198
253	RM17103	GGCAAGCGTTCTGACGTGTAGCC	TCGTCGCCCAAATGTCGTTCC	4	23.5921	92	4	21.4792	92	4	19.2247	92
254	RM17104	CTGCTCTAGTACTACCCACTTGTGC	TTGTATGTGTCAGCTTGGAGTGG	4	23.5958	108	4	21.4829	108	4	19.2285	106
255	AUT17105	ACTGATGCCGCCAAGTGTAGGG	CCCGAATTGCTTTAAGCTTCTGTACC	4	23.6168	249	4	21.5049	261	4	19.2503	187
256	RGNMS1711	CTTTCCATGCTTCCTATTACTC	CACAAATATCATGTAGGCAGTC	4	23.6174	375	4	21.5055	375	4	19.2508	375
257	RM17108	CAACTACCGGCCTAAAGCATAGC	GGTGTTTAGGAAGGTGAGGAGAGG	4	23.6999	182	4	21.7053	184	4	19.3314	188
258	RM17110	GTCGATCCTGTGCTGATTGTTCC	AGTACAGCGTACAGATGCGATGC	4	23.7287	175	4	21.7416	171	4	19.3602	175
259	AUT17111	TGGTCATCTACCAGAGCAAATTCC	CCGTCATGTCATTGATCTTCTTGC	4	23.7571	170	4	21.7695	170	4	19.3883	170
260	RM17112	TTCTCTCCTTCATCTGCCAGAGC	GAGAGGATCGTGTGGGACAAGG	4	23.7635	194	4	21.7754	194	4	19.3946	194
261	RM17113	TGTTACGCTACTGAAGCAAGTGACG	CTTCTTTGCTCTGCTTGGTGTGC	4	23.7821	177	4	21.794	201	4	19.4134	159
262	RGNMS1575	TATATATTGCCATAATCGATGC	CGACTCACGACTTTGACTACTA	4	23.7912	231	4	21.8031	231	4	19.4225	231
263	RM17115	ATCGGCTTCCATCTGTATTCTCC	CACAGACATCTCGCTACTGACAGC	4	23.7914	392	4	21.8033	340	4	19.4227	341
264	RM17116	AGTGATGCACTTCTGTTTGTCC	GGTCCTCTTGTTCAAGTCAAACC	4	23.819	107	4	21.8316	107	4	19.4458	104
265	RM17117	TGTGCATAAAGACAGTAGCGATGG	AGATGTTGTTCGGCGCATAGC	4	23.8762	392	4	21.8852	415	4	19.4916	346
266	RM17119	GCGTTGATGCGTGCTACTGTACG	ACAAATCGAACGTGTGAGTGAACG	4	23.89	310	4	21.8962	306	4	19.5037	308
267	RM17121	TGAGATCGAGAGCGTAGGTAGCC	GATATCAGCAGCGACAAGAAAGG	4	23.9271	90	4	21.9334	84	4	19.541	82
268	RM17122	TCCGTAAACACGATCGAGAAGC	GTCCCACCTAGAGTAATTCAGAGACC	4	23.9474	125	4	21.9539	85	4	19.5591	87
269	AUT17130	ACTTGTCATTCATTGCGCTTCG	CGTCAGGAGTGTCGTAGCCTAGC	4	24.0252	92	4	22.0339	86	4	19.6388	86
270	AUT17134	TTTCTACGGGCTTAGGGCTACCG	CACCACCACCATTCCAAACTCG	4	24.2349	164	4	22.212	164	4	19.8014	178
271	RM17135	GAGAGAAGCCGACGAGGAATGG	GTACAGCTTTACCCGTGCATGTAGC	4	24.235	281	4	22.2121	284	4	19.8015	284
272	RM17139	TATCTGTTGGTGCAGTTGATCC	AGCTGCCCTTACTTGATATGTGG	4	24.4227	470	4	22.4277	458	4	19.9382	456
273	RM17140	AACCGAGCTTCAGAGCTGTAATGG	AAGGTGAGGAGCTGGAGCTTGG	4	24.4316	150	4	22.4366	148	4	19.9471	150
274	RM17143	CAGCACCCTGACAGTTAAACACTCC	CAATGACCCTGTCATGGATGG	4	24.4676	186	4	22.4795	192	4	19.9782	186
275	AUT17144	ATGCATGTGATGCCAAGAGTGG	GAAAGCACACTGCACACATACCC	4	24.4883	332	4	22.5018	310	4	19.9989	350
276	RM17145	TGCACGCTCACACATGAAGAACC	TACCTTGTCCTTGCTCGGGATCG	4	24.522	190	4	22.5328	190	4	20.033	190
277	RM17148	CACAAGCTGTTCCTGCTCTCG	ATATCTGACGCCAAGCACATCG	4	24.6397	296	4	22.6681	286	4	20.1483	276
278	AUT17149	GCAAGCAGCAAGAGCGAAGAGG	CTCAAGGCCGCCTCTCAAATCC	4	24.6462	139	4	22.6746	129	4	20.1548	123
279	RM17150	CACAGTTCAGTCATCCAGTGTGG	CAGGTTCCAGCACACAGATCG	4	24.658	86	4	22.6864	86	4	20.1673	86
280	RM17151	GGCAAGGTGAAGTCTATTCCATACC	AACAGTTTAGAGGCACTCTTCCTAGC	4	24.666	183	4	22.6944	183	4	20.1753	179
281	AUT17153	GCCTCGGCTGATGTAACCTTCC	GATATGTGCTGCTGTGTGCTTGC	4	24.6836	96	4	22.7119	100	4	20.1928	506
282	AUT17154	GCTTCACCATCTGTGGATTCTCG	GTTCAGTGTTCATCGCCTCTGC	4	24.7005	195	4	22.7288	195	4	20.2095	195
283	RM17156	ATCCCTCCTCTCCGACGTCTCC	GTGGGCTTGAGCTTGGGTTTGG	4	24.7113	140	4	22.7397	140	4	20.2204	140
284	RGNMS1551b	TCTGCTGCACTCTAGTTAACAC	TTAAATAAGAACTTGGGTGGTC	4	24.7527	388	4	22.7831	388	4	20.261	388
285	RM17157	ACCGCTCGTCACAACTCACACG	GTCTTCAGCCGCCACAAGAAGG	4	24.7535	131	4	22.7839	131	4	20.2619	131
286	AUT17159	CGTTCCCTACTTCCCTCCCTCTCC	ATGATGAGCTCACGGCGAAGC	4	24.7876	91	4	22.8175	91	4	20.2956	76
287	RM17164	GGAGAAGAAACGGAGACCAATCC	CTCCTACGTGACCGTTACATTCG	4	24.9288	248	4	22.9915	248	4	20.4324	248
288	RM17167	GAAGCGACCGGAATATGATAGGG	AACCATTTGCTCCTGAGATGTCC	4	25.0557	277	4	23.27	301	4	20.5571	263
289	RM17168	CTGAAGAAATGGGAGAGGTGTGG	CCGCTGCTAGTTGACAAATTCC	4	25.0574	142	4	23.2717	142	4	20.5588	142
290	RM17170	CCACAACGCATACACATACAACG	TAGATTTACCGTGTCCCAGTTGC	4	25.0608	406	4	23.2751	402	4	20.5638	412
291	RM17177	CCACTCTGGAGAATGAAATGAACC	ACCATGGAAATCTTGCTGCTAGG	4	25.2417	143	4	23.409	143	4	20.7178	143
292	RGNMS1523	GAGACAACTCTGGTCTTGACA	GAAACGAGTAGTTGTGTTTGG	4	25.2982	262	4	23.4678	253	4	20.7773	265
293	RGNMS1561b	GAGACAACTCTGGTCTTGACA	GAAACGAGTAGTTGTGTTTGG	4	25.2982	262	4	23.4678	253	4	20.7773	265
294	RM17180	GGAGACAACTCTGGTCTTGACAGC	GGACCTCGCGTAGTTGAAGTCG	4	25.2982	165	4	23.4678	156	4	20.7773	168
295	RM17182	TGCAGCGTCTCATCATAAAGTCG	GCTTAGTGCTGTGAACTGTGAAGACC	4	25.3034	199	4	23.4731	179	4	20.7825	199
296	RM17183	TGATGATGAGGAGGATGATGTCC	GTGGAAAGAAAGGGAGCTCAGG	4	25.3038	165	4	23.4734	171	4	20.7828	165
297	RM17185	GACGAGGCGAATGGAAGAGGTTAGG	GTGCGTAGAGGACAGGATACATCACG	4	25.3308	184	4	23.4964	178	4	20.8098	184
298	AUT17187	TGGTCATTGATTACACCCTCAGC	TTCAGATGAGAAGCAAGCACTCG	4	25.4122	331	4	23.6221	369	4	20.8941	331
299	RM17188	GGCAACCTAGAAACGAACAACG	CACTCCATCTCTATCGCATCTCC	4	25.444	365	4	23.6618	367	4	20.9259	367
300	AUT17192	CATCATCGAAGCCATGAAGATCC	ACAATGGAGGAGGAGGAACAGC	4	25.4584	182	4	23.6749	176	4	20.9404	179
301	RM17194	TGGAAGCATAAGGGTAGATGAAGC	TGGATCTGTGAAAGTGGAGTTGC	4	25.519	134	4	23.7647	134	4	21.0006	134
302	AUT17201	GATCGTTGCTGCTTTCAATGAGG	AGTGTTTCACCTTGGACCCATGC	4	25.6189	189	4	23.878	179	4	21.0997	139
303	RM17203	CGAACACGAGGGAGAGGATCTCG	TCTCCCGGTGGTCGATTAGACG	4	25.6447	396	4	23.9048	395	4	21.1264	393
304	RM17205	GGACAGTGCTATCCGTGCTTACG	ACCTAGGAAAGGGCAAGGAGAGG	4	25.6684	230	4	23.9225	238	4	21.1441	232
305	RM17206	GGACAGTGCTATCCGTGCTTACG	ACCTAGGAAAGGGCAAGGAGAGG	4	25.6684	230	4	23.9225	238	4	21.1441	232
306	RM17207	GCATCAAGAGAGATCTGCATACCC	ATCCTCCATTTCGCATGTATGG	4	25.6811	179	4	23.935	179	4	21.156	141
307	RM17211	GGTGGCACACATTGATTGATCG	GGCCGTATACTGCGTCGTACC	4	25.7655	176	4	24.0256	176	4	21.2489	176
308	RM17214	GAGACATGCATGAGTCACAGG	GGTTGTCTCTCTTTAGCAGTATCC	4	25.8077	193	4	24.0673	199	4	21.2913	177
309	RM17215	GTTTGGCTGCGGCTTCTATCTCC	CTTCTCTCCCACGAGGTCAAACC	4	25.8277	87	4	24.0873	81	4	21.312	83
310	RM17216	CCCAGTTCAATTGTCGTTCTCTAGC	CGCATTGTAGACTTCAGCGAACC	4	25.8646	396	4	24.1594	396	4	21.3441	390
311	AUT17217	GGTGAGCAACTATCAAGAATCACAGC	GCTGCTACCAGGTCAGAGTTGC	4	25.8765	91	4	24.1713	91	4	21.356	89
312	RM17219	GCCCACACTACCGTCTCTTCC	GGATCAGAGCCCACATTACCG	4	25.9252	388	4	24.2198	392	4	21.4095	386
313	RGNMS1612	TCTAAGGTCTTCAGTCTTCACC	CTCTCTCAAAGGATTGAAGAAC	4	26.0144	404	4	24.3108	404	4	21.4983	396
314	RM17223	TTCGCGAAGTCCGAGATGTGC	CATGACCTGATCCCGTCTCTCG	4	26.0146	87	4	24.311	87	4	21.4985	87
315	RM17229	ACTCTCTGGAGAGGGAGGAGAGG	GCTTTGAGATTGTGGGAGAGAGC	4	26.1058	257	4	24.4072	257	4	21.5819	257
316	RM17231	AATGGCAACAACGAGACTAGG	GTCTCTGAATCCTAACCCTAACC	4	26.1712	94	4	24.4742	90	4	21.6406	92
317	RM17235	GCTCTCGAGATGCGACATAATTTACC	AGAAGAACAAGGTAGGGCCAAGC	4	26.1851	145	4	24.4909	177	4	21.6543	135
318	RM17242	GGCAGCATGCACACTTATTCC	TCTAAGCTAGGCCTGGATTGTCG	4	26.3923	443	4	24.7035	443	4	21.8336	453
319	RM17246	ATCCGAGATCAACGAGGAGAGC	TCCTCCTCATATCCTCCATCTCC	4	26.4337	199	4	24.7378	199	4	21.8637	199
320	RM17248	CACCTGGGTGTACGAAAGAGTCG	GAAAGTGTTTCTAGTCCCGGTTCG	4	26.4878	151	4	24.776	142	4	21.8909	1328
321	RM17249	GTGATTACATTAGGTGAGCCATCG	TGTACTCTCTATGCCCTACGTACTCG	4	26.4986	393	4	24.7868	385	4	21.9029	369
322	RM17254	GAAGAATGAGGTGCAGAATCACC	TGCTACATTTCGCGTTAGAGAGG	4	26.5652	196	4	24.8875	196	4	21.968	192
323	RM17255	CCAAGATCATGTAGCAGCTGTCG	CTCCACTGACATGGGTTGAACG	4	26.5671	417	4	24.8894	421	4	21.9699	420
324	RM17256	CTCGAACCACAGCCACTTCACC	CAATGTAGGCACCCAGTGATTCC	4	26.5833	81	4	24.9056	81	4	21.986	91
325	RM17258	TGCCTCCATTTCTTCAAGATAGCC	CCCATGCCATACCTGACTTTACG	4	26.6339	185	4	24.9564	185	4	22.0378	197
326	RM17259	TTGGATACTACGCTACAACGTCTGC	CTGATGGTGAAGAAGCGAATGG	4	26.646	235	4	24.9685	235	4	22.0502	231
327	RM17260	CCTCTAACCGCCTCGTCTTGG	GGGTCGACGACGAGAAGAAGG	4	26.6833	177	4	24.9997	177	4	22.0837	168
328	AUT17261	TCGTTGGTCCAAGCTCACACG	GGCCGGCAAAGGTATCTGTCG	4	26.6976	172	4	25.0141	164	4	22.0983	150
329	RM1354	CACGTAAATAATACCCGGCG	AAGGTATCTGTCGTGGTGGG	4	26.6976	172	4	25.0141	164	4	22.0983	150
330	RM1354	TCGTTGGTCCAAGCTCACACG	GGCCGGCAAAGGTATCTGTCG	4	26.6976	172	4	25.0141	164	4	22.0983	150
331	RM17262	GAGTTGCTGTGGTGGTTGTGG	GTGCAACCAAGCAATTCAAACC	4	26.6986	373	4	25.0151	367	4	22.0994	367
332	RM17263	GGCTCCCAAGTGTAGTATACGG	TCTGTAATCGACTGATGTCTCG	4	26.7086	394	4	25.025	476	4	22.1093	375
333	RGNMS1494a	GATATCAGAGGCTAAATATCGG	CCTTTATTCTTCCTTCCACTTC	4	26.763	389	4	25.0845	389	4	22.1488	389
334	AUT17269	ATTACGCCAAGTTGTGCTCTTGC	CAAGAACCGCTCTGATTGAACC	4	26.7632	189	4	25.0847	189	4	22.149	189
335	AUT17270	AACTCCTCCCTTGCTGCCTCTCC	CGAGAGGTCCTTCCACGTCAGC	4	26.7944	372	4	25.1159	372	4	22.1802	368
336	RM17273	GCTCCGCCCAATCTTCTTGAGC	GCGCTAGCTGCGTTTCTTCTCC	4	26.8388	188	4	25.1825	188	4	22.2249	188
337	RM17277	GGTCTCTCCTGCCTTGACACTCC	AAGGTGGCATTGACTCACGAACC	4	26.9204	146	4	25.2632	146	4	22.3067	136
338	RM17278	CTGAGTCTGTCTCGCTCTCTGACC	CCGCAGCAAGTCCATAGAAGC	4	26.9265	313	4	25.2693	313	4	22.313	313
339	RM17279	TCTCATGGCAAGCAGAGAGACG	CAGACACACATGAGCGACAAGC	4	26.9621	198	4	25.3048	198	4	22.3488	204
340	RM17289	GCAGGCTCCACTGTTGATCAGG	AAGATGCTAGCTACCGGCTACTGTCG	4	27.1037	174	4	25.5187	178	4	22.5699	172
341	RM17283	CTTGTTTCGTACTAGCGCACAGG	CTGGGATGATTACACGGTCTGG	4	27.1705	365	4	25.4615	365	4	22.5087	365
342	RM17284	CTTGTTTCGTACTAGCGCACAGG	CTGGGATGATTACACGGTCTGG	4	27.1705	365	4	25.4615	365	4	22.5087	365
343	RM17282	CAGGATAACTGTCTTCTCGTAACC	GAGCATAGAAGTTGTGGAATGG	4	27.1925	153	4	25.4398	163	4	22.4867	145
344	RM17293	GCACACCACCGTCCATCTCTCC	GTGGACATCCTCCTGGCTCACG	4	27.3582	89	4	25.7229	89	4	22.6567	89
345	AUT17294	CCTCACTGACACCAGTATCCTCTCC	GCTCTTGGCAGATGGTGTAGGG	4	27.3657	195	4	25.7304	193	4	22.6642	189
346	AUT17296	GTTCATTTCGTGATCTCTGAGC	GCAGATTTACAGGTTTGCTAGG	4	27.4411	263	4	25.8114	265	4	22.7409	243
347	RM17297	GGTCCCTCTCCCTCATGTCATCC	TCCGCTTCGCTCCTAGCATGG	4	27.4518	91	4	25.8222	89	4	22.751	89
348	RM17298	CTTAAGCCTTGCAGGTTGATGG	GAGCTACCGCTTCTTCACTGAGC	4	27.4782	269	4	25.8505	269	4	22.778	269
349	RM17299	CTTTCTTGACGGGACGAACTACC	GCCAGCCACCAACTCTGTAACC	4	27.519	246	4	25.8926	246	4	22.8205	240
350	RM17301	TAGACTCCCTTCCACCACCTCACC	CGCACTGACACTGCACACAAAGC	4	27.6414	391	4	26.0297	1348	4	22.9363	224
351	RM17302	TAGACTCCCTTCCACCACCTCACC	CGCACTGACACTGCACACAAAGC	4	27.6414	391	4	26.0297	1348	4	22.9363	224
352	RM17303	TAGCGATTGGATGGAGGCTGAGG	GGTCGCCTCGCCATTAGTTACG	4	27.673	135	4	26.0695	117	4	22.9678	129
353	RM17305	GAGATCGAAGACGATCGAGATGC	GGGATTTGTCCAGTACTCCTCTTCC	4	27.6894	145	4	26.0857	155	4	22.9843	147
354	RM17306	GAACCGAAACAGCAGCAAAGC	CGAAGCCTCTCTCCCTCTCTCC	4	27.7153	359	4	26.1064	355	4	22.9974	339
355	AUT17309	CGATTTGAGCCGATACATTAGGG	TGTTGGTGTCGGATTTCTCAACC	4	27.8718	244	4	26.2686	195	4	23.1421	183
356	AUT17310	CGATTTGAGCCGATACATTAGGG	TGTTGGTGTCGGATTTCTCAACC	4	27.8718	244	4	26.2686	195	4	23.1421	183
357	RM17311	CATATGATGCTCTGCAACACAAGC	TAGCTCGCGATATGATTCTGACG	4	27.8851	196	4	26.2817	190	4	23.1579	186
358	RM17312	GAGTTGAAGCACGAAGCATTGTCG	CTCGCCATTGCCCTCACAACC	4	27.9014	151	4	26.3088	151	4	23.1738	151
359	AUT17313	CGATGATCATGCCGTTCTTTGG	AACCCGCAAAGTTCACAACACG	4	27.9031	187	4	26.3105	187	4	23.1755	187
360	AUT17314	CAATCTGGAGGCACTGTCACG	AGTGACAAGATGAAGCCAACAGC	4	27.9414	148	4	26.3481	146	4	23.2131	152
361	AUT17315	AGTCCAAAGATGGCAACACAAGC	ACCGGAAGAGGAGGTTGTAGTCC	4	27.9664	192	4	26.3732	183	4	23.2382	192
362	RM17321	AAAGACAACCGTGAGGCTAGTGG	CGATGATGTACATGGGCACTCC	4	28.123	227	4	26.5219	245	4	23.3762	212
363	AUT17322	TCTGCTAGCCTGCACACAGAAGG	GCACAGGAGACCAAAGAATCAGG	4	28.2074	94	4	26.6235	90	4	23.4618	80
364	RM17323	TTGGGCTACGGACGCTCTCTCG	AGCCCGAATCTCAAAGCGTCAGC	4	28.2216	187	4	26.6377	187	4	23.476	187
365	RM17324	TGATCACACTTATCCACGTCAAGC	GAGTGGCATTTCTCTGCTCTGC	4	28.2647	128	4	26.6894	128	4	23.5197	128
366	AUT17327	GTACAAGCAAACGCTTCCCAAGG	ACGACATGTGCCGGTAGATCAGG	4	28.4135	193	4	26.8216	193	4	23.6499	193
367	AUT17329	CGCTGCCATCATCTACAACAGG	CAACAAATGCTACCTCACCATGC	4	28.446	389	4	26.8465	391	4	23.6781	353
368	RGNMS1591	TTTAAATTCACTGAAACCAACC	AAATAAGCAACAAATGCTACCT	4	28.446	348	4	26.8466	350	4	23.6782	312
369	RM17330	GGCGGTTCTTATATTAGCCTCATGC	CCTCACAAAGATGCCACGAAGC	4	28.55	296	4	26.9458	778	4	23.7762	294
370	RM17331	GTCTTTAGAGCAAGCGTGGTAGC	GAGTGGGTTCAAGAATGAAGAAGG	4	28.5529	361	4	26.9529	375	4	23.7791	365
371	RM17332	CGGTACATCACGGTATCAAATCG	TAAATGCTGGAGCGATGCTAACC	4	28.5536	165	4	26.9536	161	4	23.7798	165
372	RM17335	GCGACAGGAAGCAGTGGAAAGC	TCTCTTCTCTGCCGCGAATCC	4	28.5835	299	4	26.9834	299	4	23.8114	299
373	RM17340	TTACCTTCTTGGAGGCCTTCTCC	GGATTCTTTGGTTGGTGTTCTTCG	4	28.7035	96	4	27.1263	96	4	23.908	96
374	RM17342	GTCTCCTGCAGTGGCCTCAACC	AAGTCGCGCGTTAGCCTGTCG	4	28.7093	251	4	27.1321	248	4	23.9136	254
375	RM17344	CCGAGAATAACTCCGGGATAAGC	ATGGTCCCGTCTCTGTCTCTCC	4	28.799	117	4	27.2352	112	4	23.9856	119
376	RM17345	TTTAGCTGTTTCGCACACACG	AAGGACATCCTTCATCCTCTTGC	4	28.8017	270	4	27.2381	207	4	23.9883	263
377	RGNMS1512	AAAGTAGTAAACAAGGGTGTGG	AACAGAATGCTTACACATACCA	4	28.8103	381	4	27.2466	379	4	23.9969	379
378	RGNMS1562	AAAGTAGTAAACAAGGGTGTGG	AACAGAATGCTTACACATACCA	4	28.8103	381	4	27.2466	379	4	23.9969	379
379	RGNMS1593c	AAAGTAGTAAACAAGGGTGTGG	AACAGAATGCTTACACATACCA	4	28.8103	381	4	27.2466	379	4	23.9969	379
380	RGNMS1600	AAAGTAGTAAACAAGGGTGTGG	AACAGAATGCTTACACATACCA	4	28.8103	381	4	27.2466	379	4	23.9969	379
381	RGNMS1603	AAAGTAGTAAACAAGGGTGTGG	AACAGAATGCTTACACATACCA	4	28.8103	381	4	27.2466	379	4	23.9969	379
382	RGNMS1680	AAAGTAGTAAACAAGGGTGTGG	AACAGAATGCTTACACATACCA	4	28.8103	381	4	27.2466	379	4	23.9969	379
383	RGNMS1715	AAAGTAGTAAACAAGGGTGTGG	AACAGAATGCTTACACATACCA	4	28.8103	381	4	27.2466	379	4	23.9969	379
384	RM17346	CAGCTGCAAACACAACATTCAGC	TGATCCCTCTACTCGACCTCTGC	4	28.8122	291	4	27.2486	291	4	23.9989	291
385	RM17347	GATCGCGTCAGAGGTACTTAGCC	CCTTGTTCGTTTCCAATTCTAGGC	4	28.8181	204	4	27.2542	207	4	24.0047	204
386	RM17349	TAGCTGCTGGATGTTACCACTGC	ACCATCTATCGCCACATCTCACC	4	28.8402	194	4	27.2763	202	4	24.0287	194
387	RM17350	GAGCCACCTCCAGGTTCTTATCC	TCATCTCTCACCTGATCTCCTTCC	4	28.8698	178	4	27.3068	176	4	24.0587	180
388	RM17351	ATAAAGGAGGAGGGCCTCAGATGG	CACGGTTTGGAGGTTGGAAGC	4	28.8709	89	4	27.3078	92	4	24.0601	89
389	RM17352	GCTTGGCATCTGCTTCTGTTGTTGG	CTCGCTGCTGATCGAGGTGTCG	4	28.8991	142	4	27.336	145	4	24.0871	142
390	RM17353	GATGTGAATCATGGGAACAAGAGC	GATGATGATGTGCTGCATTTGG	4	28.9316	407	4	27.3715	396	4	24.1196	391
391	RM17355	AAAGTGGCAAGCCCATAATTCG	CTTTGAGGGCATGCTAAACTTGG	4	28.9846	169	4	27.4312	172	4	24.1724	169
392	RM17357	AGGAACGACCACTGCCACTGC	CCATCTCTGCAGTTACAGATCTCACG	4	29.0479	299	4	27.4709	269	4	24.215	281
393	RM17358	AGGAACGACCACTGCCACTGC	CCATCTCTGCAGTTACAGATCTCACG	4	29.0479	299	4	27.4709	269	4	24.215	281
394	RM17360	ATCCTGCATGTTACACTCAAGC	TATTTATCCGGATCCTCTCACC	4	29.1147	391	4	27.5178	428	4	24.265	386
395	RM17362	CTTTGCTGTGTTGAAGTCGTTGG	GGAAGACCAAACATGAAGCAACC	4	29.155	278	4	27.5594	278	4	24.3047	278
396	RM17363	GGAGCAGGCATCTGATCTAGGG	CAGTTGGGCAACAGATCCATCC	4	29.1566	163	4	27.5609	151	4	24.3062	169
397	AUT17365	ATCGATGTAGGTAGAGGGACACC	CAGATCTAGTCGACATGGTTGG	4	29.1585	217	4	27.5628	257	4	24.3081	229
398	AUT17366	ATCGATGTAGGTAGAGGGACACC	CAGATCTAGTCGACATGGTTGG	4	29.1585	217	4	27.5628	257	4	24.3081	229
399	AUT17367	ATCGATGTAGGTAGAGGGACACC	CAGATCTAGTCGACATGGTTGG	4	29.1585	217	4	27.5628	257	4	24.3081	229
400	MRG2916	CGATGTAGGTAGAGGGACACC	GTCGTACGTCCAGATCTAGTCG	4	29.1585	225	4	27.5628	265	4	24.3081	237
401	RM17372	ATTATCCAAGGTCCAAACCTACGC	GTGTGTCCCATCATCACAAACTAGC	4	29.1645	364	4	27.5736	321	4	24.3137	330
402	RM17375	CCTCCTTATATAGCCGCGTTGC	TGACGACGACATGCCTATCTAGC	4	29.2122	146	4	27.62	146	4	24.3575	146
403	RM17377	ATATTACTTCGACGCTGGATCAGG	GTCAGTTCGTCAGGCACAACG	4	29.5488	168	4	27.9427	142	4	24.7219	154
404	RM317	CATACTTACCAGTTCACCGCC	CTGGAGAGTGTCAGCTAGTTGA	4	29.6448	149	4	28.0338	155	4	24.817	149
405	RM17383	GCGACGACGAGACGAATCTACC	GCCTAGCGGTATTCCTCTCCTAGC	4	29.6756	71	4	28.0495	71	4	24.8367	71
406	RM17387	AGTGCTGTCAGAGAGAAAGCAATCC	GGAGCCATCGAGTGTCATCACC	4	29.7953	155	4	28.1924	163	4	24.9565	155
407	RM17391	ACTTTGCTCTGAACTTGCAGTGG	GCTAGCTGCTATCAGGATTCACG	4	29.8635	175	4	28.2726	183	4	25.0115	155
408	RM17393	ACTATGCCGTGTGGGTATGTGG	GTGTACTGGTGAGCTGAGAGTTCG	4	29.9468	647	4	28.3599	643	4	25.0956	619
409	AUT17399	AAGAGCACGTCTCGAGCAGATGG	CCGCCCTGGTCGTAGTAAATCC	4	30.0598	175	4	28.4844	175	4	25.1863	175
[truncated: 188 more rows]

## Sheet: Chr 5
SL. No.	Marker Information			Oryza sativa ssp. japonica			Oryza sativa ssp. indica			Oryza rufipogon
[truncated: 742 more rows]

[truncated: 7 more sheets: Chr 6, Chr 7, Chr 8, Chr 9, Chr 10, Chr 11, Chr 12]
