# Supplementary material
Source: Research Square preprint supplement (doi:10.21203/rs.3.rs-9327164/v1)
Supplement: Supplementary file 1 [file 10db90b67460f10491757479.pdf]

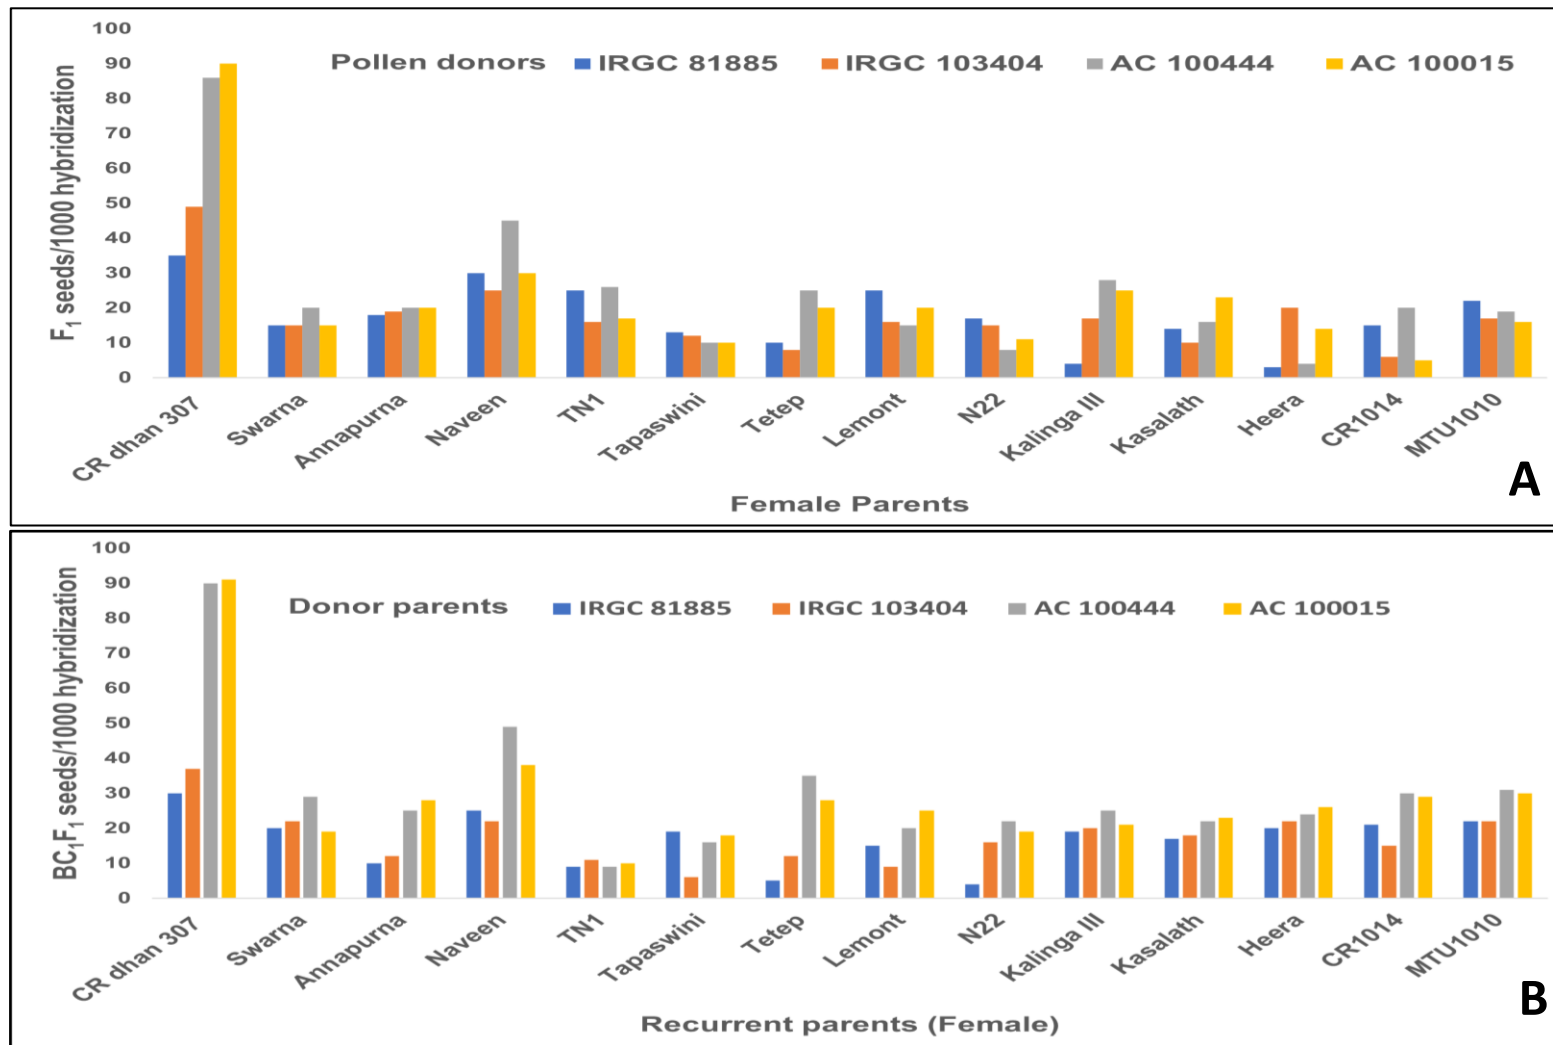

**Supplementary Fig. 1** Graphical representation of seed setting (in numbers) in F<sub>1</sub> and BC<sub>1</sub>F<sub>1</sub> after emasculation and pollination in 56 interspecific crosses involving four accessions of *Oryza rufipogon* as donor and 14 *Oryza sativa* cultivars as recurrent parent. To generate F<sub>1</sub> seeds, the *Oryza rufipogon* accessions were used as pollen donor. To generate BC<sub>1</sub>F<sub>1</sub> seeds, the 56 F<sub>1</sub> progenies were used as pollen donor.

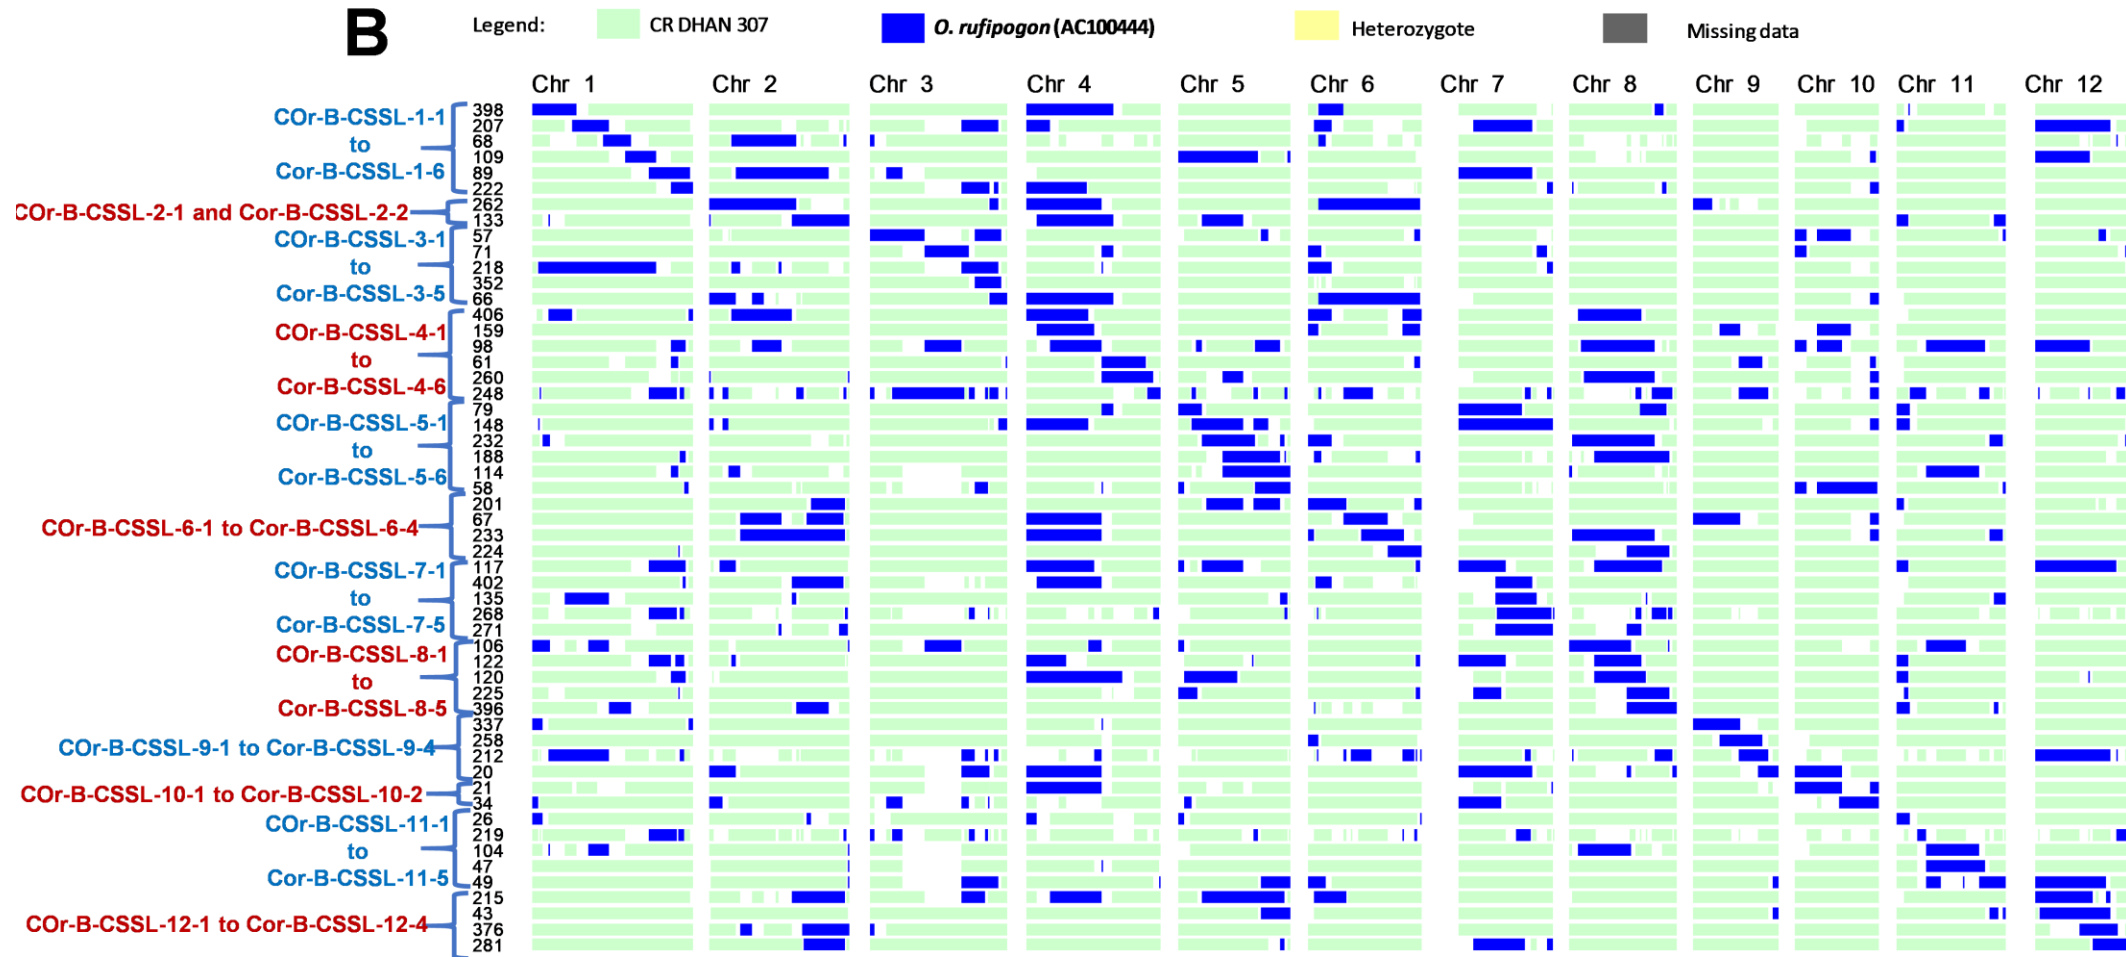

**Supplementary Fig. 2** Graphical representation of the chromosome segment substitution lines (CSSLs) from the identified from BC<sub>3</sub>F<sub>6</sub> population of CR Dhan 307 × *O. rufipogon* accession AC100444 identified through CSSL Finder software
