# Supplementary material
Source: Research Square preprint supplement (doi:10.21203/rs.3.rs-9327164/v1)
Supplement: Supplementary file 2 [file 64b6e2dfef4c8ed43eb24540.docx]

**Supplementary Table 1** List of wild species and cultivated rice genotypes used in the study

| **Sl. No.** | **Species** | **Accession/Cultivar name** | **Pedigree/ Others details** | **Seed source** |
| --- | --- | --- | --- | --- |
| 1 | *Oryza rufipogon* | IRGC 81885 | Wild germplasm | IRRI, Philippines |
| 2 | AC 100444 | Wild germplasm | ICAR-CRRI, Cuttack |
| 3 | AC 100015 | Wild germplasm | ICAR-CRRI, Cuttack |
| 4 | IRGC 103404 | Wild germplasm | IRRI, Philippines |
| 5 | *Oryza sativa* | CR Dhan 307 | Dandi/Naveen | ICAR-CRRI, Cuttack |
| 6 | Swarna | Vasistha/Mahsuri | ICAR-CRRI, Cuttack |
| 7 | Annapoorna | TN1/PTB10 | ICAR-CRRI, Cuttack |
| 8 | Naveen | Sattari/Jaya | ICAR-CRRI, Cuttack |
| 9 | TN1 | Selection from *indica* landrace | ICAR-CRRI, Cuttack |
| 10 | Tapaswini | Jagannath/Mahsuri | ICAR-CRRI, Cuttack |
| 11 | Tetep | Landrace (*indica*) | ICAR-CRRI, Cuttack |
| 12 | Lemont | Selections within *japonica* germplasm | ICAR-CRRI, Cuttack |
| 13 | N22 | Aus landrace | ICAR-CRRI, Cuttack |
| 14 | Kalinga III | AC 540/Ratna | ICAR-CRRI, Cuttack |
| 15 | Kasalath | Aus landrace | ICAR-CRRI, Cuttack |
| 16 | Heera | CR 408-48/CR 289-1208 | ICAR-CRRI, Cuttack |
| 17 | CR1014 | T 90/Urang Urangan | ICAR-CRRI, Cuttack |
| 18 | MTU1010 | Krishnaveni/IR64 | ICAR-CRRI, Cuttack |

IRRI: International Rice Research Institute, Las Banos, Philippines; ICAR-CRRI: Indian Council of Agricultural Research-Central Rice Research Institute, Cuttack, Odisha-753006, India

**Supplementary Table 2** Survey of weedy rice infestation levels and leaf sheath pigmentation frequencies under different cultivation practices and crop varieties selected districts of four states in eastern India (2024–2025)

| State | District(s) surveyed | Year | Samples | Cultivation method | Infestation levels of weedy rice in the field(s) surveyed | Variety/varieties grown or rotated in the fields over at least three years | Weedy rice Leaf sheath colour and frequencies (%)  (Mean ± SD) | Awn types in weedy rice |
| --- | --- | --- | --- | --- | --- | --- | --- | --- |
| West Bengal | Cooch Behar | 2025 | 6 | Transplanting | Very Low (<1%) | PAN804 | G (100)  P (0) | Medium (98.33%)  Short (1.67%) |
| Odisha | Cuttack | 2024 | 2 | Direct seeding | High (>30%) | Kalachampa* | P (89.00 ± 2.83)  G (11.00 ± 2.83) | Medium (10.5%);  Long (89.5%) |
| 2025 | 2 | Transplanting | Low  (>1-10%) | Kalachampa* | P (85.50 ± 4.94)  G (14.50 ± 4.94) | Medium (36.5%); Long (63.5%) |
| 2025 | 2 | Transplanting | Low  (>1-10%) | MTU7029 and Pooja | G (97.00 ± 1.41)  P (3.00 ± 1.41) | Medium (100%) |
| 2024 | 2 | Hybrid Swarms | Absolute | Currently uncultivated | G (72.50 ± 4.95)  P (27.50 ± 4.95) | Medium (58.5%); Long (31.5%) |
| Bihar | Rohtas | 2024 | 6 | Transplanting | High (>30%) | MTU7029 | G (98.00 ± 2.10)  P (2.00 ± 2.10) | Medium (47.66%); Long (52.33%) |
| Uttar Pradesh | Ghazipur | 2025 | 6 | Direct sowing | High (>30%) | MTU7029 and PAN804 | G (96.50 ± 2.35)  P (3.50 ± 2.35) | Medium (95.67%);  Long (3.33%)  Awnless (1.00%) |
| 2 | Hybrid Swarms | Absolute | Currently uncultivated | G (69.50 ± 2.35)  P (30.50 ± 2.35) | Medium (78.5%); Long (21.5) |
| Gorakhpur | 2025 | 6 | Direct sowing | High (>30%) | MTU7029 and PAN804 | G (99.33 ± 0.82)  P (0.67 ± 0.67) | Medium (88.33%); Short (11.67%) |
| Deoria | 2025 | 6 | Direct sowing | High (>30%) | MTU 7029 | G (99.17 ± 0.75)  P (0.83 ± 0.75) | Medium (85.67%);  Short (12.00%)  Awnless (2.33%) |

* Kalachampa a landrace with purple leaf sheath streamlined to formal seed chain of Odisha from 2016. Details available at https://www.wassan.org/wp-content/uploads/2022/12/Kalachampa-WGoSS-Case-Study-December-2022.pdf. Other three varieties (MTU7029, PAN804 and Pooja) possessing green leaf sheaths are widely grown in the rice belts of eastern India where the survey was done.

**G**: Green; **P**: Purple.

The farms in the three states followed hand weeding or weeding through manually drawn weeders. In Uttar Pradesh applications of conventional herbicides was the key weed management strategy. Only grain filled samples were considered for shattering through hand pressing and shaking of panicles. All the medium and large awned weedy rice samples showed shattering habit. However, the extent varied among Awnless or short awned weedy rice plants.

**Supplementary Table 3** Parameter settings and assumptions for simulation of leaf sheath pigmentation dynamics across the crop–weedy rice continuum

| **Sl. No.** | **Parameters** | **Assumptions** | **References** |
| --- | --- | --- | --- |
| 1 | Trait segregation | Single dominant gene  (F2, Purple: Green= 3:1) | Chin et al. 2016;  Present study |
| 2 | Complementary gene action  (F2, Purple: Green= 9:7) | Kang et al. 2023 |
| 3 | Proportion of ‘complementary gene action’ and ‘single dominant gene inheritance’ in population of weedy rice | 1:0 and 1:1 | Assumed |
| 4 | Average natural outcrossing rate per generation | 5.0% and 10.0% | Xia et al. 2011  (Range 0.40-11.47%) |
| 4 | Average selfing rate per generation | 95.0% and 90.0% |
| 5 | Leaf sheath colour of the crop varieties grown constantly | Purple | Assumed |
| Green |
| 6 | Base population composition of weedy rice and crop | 30:70 |
| 7 | Base-population polymorphism in weedy rice | Purple: Green=30:70 |
| 8 | Levels of selection pressure applied against weedy rice plants contrasting for leaf sheath colour of main crop | 0  (No selection) |
| 100  (Unidirectional selection) |
| 10 | Mutation, migration and random drift | Uniform for both traits |
| 11 | Other factors affecting survival and persistence | Uniform for both traits |
