# Supplementary material
Source: Research Square preprint supplement (doi:10.21203/rs.3.rs-9327164/v1)
Supplement: Supplementary file 2 [file 590530df1935acb1d5b6a5c8.xlsx]

## Sheet: Summary Sheet
Title	Predictive models and wild progenitor-derived introgression lines dissect the population dynamics of domestication syndrome traits associated with crop mimicry in weedy rice
Authors	Swayamsiddha Aswita Dhal, Anilkumar Chandrappa, Debashree Dalai, Anowar Hossain, Ashok Kumar Singh, Anarghya Brahmankodu Kumar, Virender Kumar, Soham Ray, Kshirod Kumar Jena, Nimai Prasad Mandal, Divya Balakrishnan, Kutubuddin A Molla, Pratik Satya, Chinmay Kumar Pradhan, Trilochan Mahapatra, Dipti Ranjan Pani*, Meera Kumari Kar** and Mridul Chakraborti***
Journal	Theoretical and Applied Genetics
Datasheet Title	Non-syntenic STMS markers identfied across the genomes of Oryza sativa ssp. japonica, O. sativa ssp. indica and O. rufipogon
Abbreviations used	CHR: Chromosome Number
	Exp. Amp. (bp): Expected Amplicon size in base pairs
	Position (Mb): Predicted physical position of the marker in respective chromosome of the species expressed in mega base strating with 0.000001 Mb position of respective chromosme short arm telomeric end
ID_Key	Species
Osaj	Oryza sativa ssp. japonica
Osai	Oryza sativa ssp. indica
Oruf	Oryza rufipogon
Basic data source for non-syntenic marker identification	Dalai D, Pani DR, Dhal SA, Behera M, Mondal TK, Tp MA, Vijayan J, Sarkar D, Ghose P, Roy A, Molla KA, C A, Bose LK, Mohapatra T, Ray S, Kar MK, Chakraborti M (2026) A robust 1K-core marker set for wild germplasm management and targeted pre-breeding of rice: development and applications. Theoretical and Applied Genetics 139(1):23. https://doi.org/10.1007/s00122-025-05133-1

## Sheet: Chr 1
	Marker Information			Oryza sativa ssp. japonica			Oryza sativa ssp. indica			Oryza rufipogon
Sl. No.	Marker Name	Forward Primer Sequences	Reverse Primer Sequences	Osaj_CHR	Osaj_Position (Mb)	Osaj_Exp. Amp. (bp)	Osai_CHR	Osai_Position (Mb)	Osai_Exp. Amp. (bp)	Oruf_CHR	Oruf_Position (Mb)	Oruf_Exp. Amp. (bp)	Nature of Translocation
1	AUT10030	GATCGGATCCTTCCAAATTGC	TATTTCCTCGCTAGCTCCAACC	1	0.455276	387	9	15.3765	326	1	0.424868	365	Inter-chromosomal
2	RM10111	TCCCACGAGAATCTGTATCAGAGC	CTGGTGATTGCAACGAGACACC	1	2.10426	81	1	2.47397	81	11	23.3368	81	Inter-chromosomal
3	RM10183	CATCGACGTTCTTGGACATGG	GCACCAGTGCTTCTACGACTGC	1	3.74419	129	1	4.20728	132	3	26.142	151	Inter-chromosomal
4	AUT10428	AGAAGAAGCGAAACGATGGAAGC	AGGAGAGCGATCAGCGACAGC	1	7.07526	266	4	10.6959	248	1	6.56899	245	Inter-chromosomal
5	AUT10429	AGAAGAAGCGAAACGATGGAAGC	AGGAGAGCGATCAGCGACAGC	1	7.07526	266	4	10.6959	248	1	6.56899	245	Inter-chromosomal
6	RM10472	GCCAATCAGATTCCACCCTAAGC	CTTGCTGCACTGTGAGAATTGC	1	7.49683	185	4	3.91321	182	1	6.99267	191	Inter-chromosomal
7	RGNMS181	GAAGCAGAGTAGAGAAGGAGAG	GAAGTTGGAGGGCCGGTAGTGG	1	8.5458	313	4	30.2263	313	1	7.99578	313	Inter-chromosomal
8	RM10917	CACCATTGCCTTTACTTGCTTCC	AGCAGCCAGTCATCGTGTTGG	1	15.3298	142	1	16.7397	97	7	15.2975	137	Inter-chromosomal
9	AUT11338	ATGAGGATCTGCTTCCGTCTCC	CTCGCGAGCTTTGAGACAAGC	1	26.1488	221	12	5.02995	221	1	22.2999	213	Inter-chromosomal
10	AUT11349	AGCGGCTTTGTCACTGTATTTCC	GACGAGTATAGTGATAGCGTTTGACG	1	26.3933	241	5	22.4744	278	1	22.5618	232	Inter-chromosomal
11	AUT11837	CCATGACCTACACAAACGAAACG	ATCAATCGCCACTCAATCTCTGC	1	37.2279	294	3	7.95624	284	1	32.6038	296	Inter-chromosomal
12	AUT11855	ACAAACCTAGCGGAGTGGACAGG	GCCAAATGGTACCTGAGCATGG	1	37.7632	175	1	39.4475	175	9	16.277	178	Inter-chromosomal
13	RM11856	CATGGGTCTTGTGGGTTTAGGG	CAAAGGTCCCTCATCTTGTCACC	1	37.7831	184	1	39.4677	102	9	16.2571	257	Inter-chromosomal
14	RM11974	TACGAAGTGCCAACCACTCATGC	CAAGAGATTAAATGTCCGGCTTGG	1	40.0996	173	1	41.9749	169	5	4.62889	602	Inter-chromosomal
15	RM12289	AGGAAGGGAGTATGATCGATTGG	TCCCAAGTGATTTAAGCTGTCG	1	45.0116	107	1	47.2613	107	1	39.825	107	Inter-chromosomal
16	RM12292	ATGAGACGATGAAAGCCTCAAGC	GTGGGACAAGCAAATTGAAACG	1	45.019	449	1	47.2674	543	1	39.8316	394	Inter-chromosomal
	RM259	TGGAGTTTGAGAGGAGGG	CTTGTTGCATGGTGCCATGT	1	7.44664	171	1	8.08657	172	1	6.9415	176
317	RM10471	GACCGATCGTGAGCTAGGTAGGG	CTCGCTCTCGCACAAATCAATCC	1	7.47567	182	1	8.11408	180	1	6.97141	177
318	AUT10473	ATCTAATTCCAGTGGCGCAGAGG	TGGAGCTAAGTGAGAGCTAGTGATGG	1	7.51605	225	1	8.14635	229	1	7.01239	241
319	RGP143	CTCATCGCCACCGGCAAGAAGA	CATCACGGTGGTGGTCGGCTTC	1	7.51641	107	1	8.14671	110	1	7.01275	110
320	RM10476	TCCATTCTCTCCTCCTCCTCTCC	CCAAGAACCTCACTTCACTCAGACC	1	7.57025	166	1	8.19823	166	1	7.06891	163
321	AUT10477	AGGTTCTTGGGTGGAAGCGAAGG	GACGATGGGTCAACCTCCATCC	1	7.57041	91	1	8.19839	83	1	7.06906	85
322	RM10481	TGGAGAGAAGACAGAGCATATACTGG	CAGGGATGGAGCATTGGTAGG	1	7.66251	178	1	8.30102	168	1	7.15908	168
323	RGNMS168b	GTCTCTTCGACTTTATATGAGAGG	ATCAATCGATAAACACATACACTC	1	7.66679	257	1	8.3053	257	1	7.16336	257
324	RM10483	CATCATCGCAAATTCACCCTAGC	GCTGAACCAGATGGGTATATCAGC	1	7.67272	181	1	8.31126	185	1	7.16928	191
325	RGNMS168c	ACATGTCTAATCATCCACCAAAC	AGCTATTACACAGGTTACTCATCA	1	7.68457	234	1	8.3232	234	1	7.18115	234
326	RM10485	CGTCTTTCTCCTCCGGCAACG	AGGAGCCAAGGAAGACGTGAAGG	1	7.69193	148	1	8.33266	142	1	7.18852	133
327	RM10487	CCCATGTGATCGGAATATACGC	CGCCATGCTTTCTAACATCATCC	1	7.73523	267	1	8.39982	265	1	7.23402	260
328	RM10495	GTCGCAGTGGATTCTAGGGTTCG	CGTGTCTCCTCTCCTCCTCATGC	1	7.8995	112	1	8.55675	121	1	7.37329	109
329	RM10496	TTCTCTCCAATTCTTCGCAAGC	AGATGGAGAGGTGAGGGTTTCG	1	7.90234	480	1	8.56063	1036	1	7.3757	464
330	RM10503	GCAGCCTTTGTAGTTTGAACATCG	GATCCTCTCAGCTCCCGAAACC	1	7.94593	150	1	8.60325	682	1	7.41596	150
331	RM10505	CCGCCGATATCTGTTCATCTACC	TTCTGAAACACCAACCCAGATCC	1	7.97377	88	1	8.63768	88	1	7.42869	88
332	RM10510	CTCTTGCTGCTCCGAACTTCC	CAGCCCATTTCCAGTTCATCC	1	8.03408	98	1	8.70542	98	1	7.4758	98
333	RM10511	CTCTTGCTGCTCCGAACTTCC	CAGCCCATTTCCAGTTCATCC	1	8.03408	98	1	8.70542	98	1	7.4758	98
334	RM10513	CTAGCTGCTTTGCTTGTCGCTTGG	GCTCGAGAGTTGCCAACCAATCC	1	8.07249	81	1	8.75745	93	1	7.51412	96
335	AUT10514	GTAGCCATAGCCTTTCCCAAAGC	TCTCCTGCAGCTGATTTCTTGG	1	8.07412	272	1	8.75909	256	1	7.51551	246
336	RM5496	GTAGCCATAGCCTTTCCCAAAGC	TCTCCTGCAGCTGATTTCTTGG	1	8.07412	272	1	8.75909	256	1	7.51551	246
337	RM10516	CCTGTATTGACTGTGTTCCACATCG	ACCATCACTTCTTCTACGTCTCACG	1	8.08636	187	1	8.79266	103	1	7.52773	489
338	RM10517	CCTGTATTGACTGTGTTCCACATCG	ACCATCACTTCTTCTACGTCTCACG	1	8.08636	187	1	8.79266	103	1	7.52773	489
339	RM10518	CACTTTACAGACAGGGCGTTTGC	CCTGTTGGATTGGTCACTTAGTTAGG	1	8.13024	295	1	8.85619	303	1	7.55962	1154
340	AUT10520	GCAGTAATATGTGGAGGTTTCG	GTAGGTCAAAGCCTTCTATCAGC	1	8.13845	625	1	8.86355	803	1	7.56792	824
341	AUT10521	GCAGTAATATGTGGAGGTTTCG	GTAGGTCAAAGCCTTCTATCAGC	1	8.13845	625	1	8.86355	803	1	7.56792	824
342	RM576	ggacggcgagttcataaatag	cttgatgggataaaagcatcag	1	8.13864	240	1	8.86373	419	1	7.56834	203
343	RM10522	TCTCTGATGGATGTGTAGGAACG	GTACTACGACTGCAAGAGGAAGC	1	8.15205	387	1	8.8773	387	1	7.59877	387
344	RM10523	GGAGATGGAGCTCGTCCACAAGG	TTCAGAAACCTCATCCCTGACACG	1	8.15922	194	1	8.88448	197	1	7.60595	194
345	RM10524	GACATTTGAATGGGTGACATGC	TTAGGTCGACGAGGAGATGAAGG	1	8.17491	189	1	8.89476	185	1	7.61617	192
346	RM10527	AGGTCTCTCATGGCTTCTTGG	ATCGAGCTAGAGATGGAGAAGTCG	1	8.30509	384	1	9.11889	381	1	7.7356	384
347	AUT10529	GTTGCGGTTTGTTCGTTCTTGC	TAGATCCCAGCAGACGGATCAGC	1	8.32891	174	1	9.14238	138	1	7.76959	162
348	RM583	AGATCCATCCCTGTGGAGAG	GCGAACTCGCGTTGTAATC	1	8.33003	192	1	9.14245	156	1	7.76968	180
348	AUT10531	GTCCACAGATACGCAGGTACACG	CATCATCAGCAGGTCAGTTTGG	1	8.36104	75	1	9.1928	63	1	7.80168	75
349	RM8140	CCAAAAGTATAGCTCACACCTCA	GTTGTACCGAGGTCGTAGGTTT	1	8.38837	114	1	9.22018	119	1	7.82895	114
350	RGNMS132	CTCTCTTTCCTCTCTCCTACCT	GGGTTAAGTTTAGCCAAATCGG	1	8.40329	228	1	9.2284	228	1	7.84563	228
351	RM10534	AGTCGAGAGTGAACTTGGTTGGTTGG	AGCATCTGCAGCACCCAGTTCC	1	8.40343	450	1	9.22854	450	1	7.84577	447
352	AUT10535	AGATATACACGGCAATCCGATCC	GTAGGGTTTGAAAGCTTGAAGTGC	1	8.4101	286	1	9.24775	296	1	7.85244	265
353	RGNMS166	ACTAAAGTTTCTCTCTCCTCTCCT	CCCGCCGAATTCTAGGGTTTCC	1	8.42918	137	1	9.26688	139	1	7.87151	137
354	RM10536	AAATCGGGTGGATATTCGTGAGC	TCGTCTCATCTCATCTCGTCTCG	1	8.42938	173	1	9.26707	169	1	7.87171	173
355	AUT10538	TTCCGAGTGGTTATGCAAATGG	TCGTGACCTGAGAAATTGTGTCC	1	8.45157	195	1	9.28507	181	1	7.89412	165
356	RM8147	TTCCGAGTGGTTATGCAAATGG	TCGTGACCTGAGAAATTGTGTCC	1	8.45157	195	1	9.28507	181	1	7.89412	165
357	RM10542	TGGGAGAGTACTCATCAAAGC	TTCTGCTCTAGTAGCATACTGTCG	1	8.52109	415	1	9.34887	291	1	7.96883	555
358	AUT10543	GTAACAGCGACCGTTGGTTGG	CCCATCATCTGATGTCACACTCC	1	8.57704	182	1	9.42975	180	1	8.02214	180
359	RGNMS291	ATTCCTATCCATCCTCCTTCAG	CAGGAGATTTCATTCCGCATAG	1	8.68203	137	1	9.52506	137	1	8.1026	137
360	RM10551	AGCTTCTCCTCCTCCTCTTCTCG	CGCCAATCTCAAATCGAAATCC	1	8.69848	140	1	9.54188	123	1	8.11905	140
361	RM10553	GTAGACGGCGTTGTCGTACTTGG	ATCATCGAAACGAAAGCGAAGC	1	8.70724	393	1	9.55	393	1	8.12745	393
362	RM8093	TCATGGTTTGTCATGGAATGTTATTATTCA	AACAAATAGCATGCACACATGATACTGATG	1	8.77247	155	1	9.63019	1461	1	8.19244	129
363	RM10568	ACGACGTGGAGGAAGGAAGAGG	GGACGAACACCTTTGATCACATCC	1	8.90058	371	1	9.73557	371	1	8.27956	371
364	AUT10569	GGGATACGAATCCAAGTTTGATGACC	TTTGCCTCATAGTAGGCCCACACC	1	8.91573	361	1	9.75072	305	1	8.29467	313
365	RM8083	GATGTGCAAATTATCATGTGTTTTGTGAGG	ATAGTAGGCCCACACCTGACAGGTTGTA	1	8.91594	153	1	9.75092	97	1	8.29487	105
366	RM10572	CATACCAACCGGCTTTGCTTCG	GTTTCGACAGGACACGAGGAAGG	1	8.95603	193	1	9.8142	193	1	8.3358	197
367	RM10574	TGATACACAGATCGGCAGAAAGG	GCAACAGAGTACTACCTGACGAAACC	1	8.98526	258	1	9.83981	258	1	8.36283	270
368	RM10575	CAGCCTCACGGGACATCATCC	CACAGCCGTCGAAACCCTAGC	1	9.06546	273	1	9.93128	273	1	8.43616	271
369	RM10578	GCGAGTAATTATGGTGGTGTTTGG	CCCTCGACCATTCGTATAGTTACTCC	1	9.18734	291	1	10.0999	287	1	8.56293	244
370	AUT10580	TGCTGCTGCTGCTTTACATTGC	CACCTCCTCGAACGAGAACTCC	1	9.19108	187	1	10.1037	187	1	8.5666	190
371	RGNMS383	ACGCCTCATCTGACTCTTCTTC	GTCAACTTGGACGGGAGGCAGG	1	9.25816	164	1	10.1774	164	1	8.63187	160
372	RGNMS384	GTTGTTGGACGATGGTGAGGTC	CTACTGCTAAGTGCTACTAACTGA	1	9.29226	334	1	10.2161	334	1	8.66623	334
373	AUT10585	TGTTCTTGTGGCTGAACTCTTGC	GGCACTTCACGTAGCAAACTAGC	1	9.31744	141	1	10.2413	143	1	8.69142	135
374	RM8133	AAAACTGACTGTTTGTTTAAATGAAAT	GTTACTGCTGTAATGTGAATTGCT	1	9.39025	151	1	10.33	169	1	8.76086	140
375	RM10590	GAGGGTATGTACTCTCGTTGTTGC	TTTGCTATAGTAGTGCAGCAGTGG	1	9.40418	447	1	10.3463	431	1	8.7748	402
376	AUT10591	ACCGGCGGTCCTAATAACTATGG	GGTCCGATTAGATGAGAATCAGTTGG	1	9.43578	291	1	10.3823	404	1	8.80505	230
377	RM8131	GGTCCTAATAACTATGGTTGTCGCTA	TGCTAAGTGATGAGAATCAGTTGATATT	1	9.43579	138	1	10.3823	97	1	8.80506	102
378	AUT10594	CCTGTTAGGTGGCACATTTATGG	TCGGCCCTGTATATCATTACTCG	1	9.46355	295	1	10.409	313	1	8.83562	703
379	AUT10595	GGACAAGAGGTTCCTCAATCTCG	AAACGGGATTATCGCCACTACC	1	9.48555	198	1	10.431	188	1	8.85806	189
380	RM10596	CAACAACCTGGCAGAGAATTTCG	CTGCACGTGATGTCAGAGTTCG	1	9.4898	263	1	10.4352	213	1	8.8623	215
381	RGNMS182	CTAAGGTTAGAGTTAGCCAAGAAC	TGTTCATACAGAGGAGAGAGATAA	1	9.56691	283	1	10.4962	290	1	8.92724	283
382	RGNMS193	CTAAGGTTAGAGTTAGCCAAGAAC	TGTTCATACAGAGGAGAGAGATAA	1	9.56691	283	1	10.4962	290	1	8.92724	283
383	AUT10602	ATTGATCGAGCAGAGACACAACG	ATTCAACAATGGCTGCGGTAGG	1	9.59419	116	1	10.5167	104	1	8.94801	113
384	AUT10604	GAAATGGACTCGCTCCTAAACTGG	ACGAACTAGAGCATGGGCACTCC	1	9.60562	263	1	10.5281	248	1	8.95964	239
385	RM8070	GAAATGGACTCGCTCCTAAACTGG	ACGAACTAGAGCATGGGCACTCC	1	9.60562	263	1	10.5281	248	1	8.95964	239
	RM580	GATGAACTCGAATTTGCATCC	CACTCCCATGTTTGGCTCC	1	9.60667	221	1	10.5281	206	1	8.95965	197
386	RM10605	CTTCGTCGCAGCCCAAGAGAGG	GGCAGTACGGGCACTTGATCTCC	1	9.68977	191	1	10.6273	182	1	9.04313	191
387	RGNMS395	TTATTTATTTATTTAACCCTTCCC	CTCCTCGCTCTCGCTGGATCTC	1	9.69871	146	1	10.6362	145	1	9.05211	146
388	RGNMS286	GTTCCCTTTCCAATTTCACCTC	GTGGTTTCCTCTTTCTTCTTCT	1	9.69874	106	1	10.6363	109	1	9.05214	109
389	RM10607	CAAATCAAGAACCGCATCAAGC	CCTGCTACACTTCCCGTTTCC	1	9.70834	280	1	10.646	279	1	9.06174	280
390	AUT10608	TCTCCCTCTACTCCGGCCATCC	CTTCCTCGTCCACGGTTTGTACG	1	9.71094	266	1	10.6486	260	1	9.06436	260
391	AUT10609	AAGAGGTTGCCCTTTCTCCATCTCC	GGGAGGAGCAACGCAATTATGC	1	9.72576	602	1	10.6636	500	1	9.08032	1381
392	RGNMS200a	TTTGGTGTGTATACGAGTAAATTC	ACATCAAACAATTTATATTTCCTT	1	9.73751	122	1	10.6752	122	1	9.09235	122
393	RM10618	CCAAATCGTCGCCAGAGAATCC	TTCTCTCTGCCTCGACAGCAAGC	1	9.81587	314	1	10.7551	317	1	9.16915	326
394	AUT10619	ATCCAAGCTCCTGAAATGCATCC	TGGTACATGCCCATATCAAGAAGC	1	9.82713	293	1	10.7664	266	1	9.18106	275
395	RM8053	TCTAAAAGAGACATTGCCGATGATA	CATACTCAAAGTCACGGAAAGTACC	1	9.82726	234	1	10.7665	208	1	9.18119	216
396	RM10620	CGGAGGTTTCCTAACAGTGTGG	ATTGATGTGCCCATCCTACATCC	1	9.83108	575	1	10.7703	583	1	9.185	421
397	RM10621	CGGAGGTTTCCTAACAGTGTGG	ATTGATGTGCCCATCCTACATCC	1	9.83108	575	1	10.7703	583	1	9.185	421
398	AUT10622	CGCGGTTAATGTCATCTGATTGG	CCATACTTCGAGATCCAAGACTGACC	1	9.86556	167	1	10.8099	181	1	9.21898	162
399	RM8051	CGCGGTTAATGTCATCTGATTGG	CCATACTTCGAGATCCAAGACTGACC	1	9.86556	167	1	10.8099	181	1	9.21898	162
400	AUT10623	AGTACGATTTCTGTCAGCGTTGC	TGAAAGGAGTAGCCAGAGAAAGC	1	9.93859	349	1	10.887	270	1	9.29159	309
401	AUT10624	AGTACGATTTCTGTCAGCGTTGC	TGAAAGGAGTAGCCAGAGAAAGC	1	9.93859	349	1	10.887	270	1	9.29159	309
402	RM8046	AGTACGATTTCTGTCAGCGTTGCTTAGT	GGATGAAAGTTGATGGATGATCTACTTGTT	1	9.93859	194	1	10.887	115	1	9.2916	154
403	RM10628	AGAGCAAACCGCACGAATCAGC	TCCTTCGAAACCAATCCATCTCG	1	10.0143	164	1	10.9525	165	1	9.36297	167
404	RGNMS251	CTTTATTATTGTTTCGGTATGATG	ACCAGTACAAGAATCCAATACACT	1	10.1476	192	1	11.0415	188	1	9.43406	191
405	RM10634	GGATAAATTGCCACCCTAACTCG	GAGTCGAGATGGTCCAAAGTGC	1	10.152	512	1	11.046	466	1	9.43857	499
406	RM10635	GCCGAGCTAGTATTAGGCTCATAGG	TGCTCGTTGGGTACTAGTATCATTGG	1	10.1542	436	1	11.0481	408	1	9.44068	432
407	RM10637	AATGATGAGGTGAGGGTTGAAGG	CAGTCAGTGACCCAGTCAATCTCC	1	10.1878	285	1	11.0817	279	1	9.47471	285
408	RGNMS256	TACATAACTTGAAGTCCAGGAATA	AACACTCCTGTCTTACTCTTTCC	1	10.2488	276	1	11.1671	277	1	9.53198	276
409	RGNMS275	TACATAACTTGAAGTCCAGGAATA	AACACTCCTGTCTTACTCTTTCC	1	10.2488	276	1	11.1671	277	1	9.53198	276
410	RM10642	TCGACGAAGAGGACTGACACG	CAGGTAGGAGCTGCATATATGATTGG	1	10.2488	709	1	11.1672	362	1	9.53205	653
411	RM10643	CCCATACTCACCGTTGACATCC	GAGTGGGAGGACATGAGCAAGC	1	10.2511	158	1	11.1691	158	1	9.53422	158
412	RM10644	TCCGGCAAATATAGTCCAAACG	CAACGACGACGACATGTATAGGC	1	10.2929	199	1	11.227	209	1	9.58169	197
413	RM10648	CCAGCCCAAGCTCCTCTTCTGG	CAGAGGAGGGAGCAAGCGAACC	1	10.3127	158	1	11.243	158	1	9.59026	158
414	RM10649	GACCAATATGGAGTGGTCTCTTGG	ACGCTCCGCCTGCTATTTAGG	1	10.3331	444	1	11.255	411	1	9.61068	396
415	AUT10651	CTATGCCTCCGCCTCTATCTCC	CTCTCTGGACCTACCCGTCATCC	1	10.3568	151	1	11.2797	175	1	9.63432	143
416	RM10654	CGAAGGACGCGTAGGTGTAGAACC	CTCGCGCATATCACAGTCACAGC	1	10.3913	273	1	11.3789	276	1	9.66977	273
417	RM10656	GCTGAGAGCTGATTAATCGGAAGC	CGCCACTAGCTAGCACACACC	1	10.4187	190	1	11.4065	176	1	9.69685	192
418	RM10660	GATCGAACCCACGATCTCACC	CAATAGCTGCTCCACGTCACTAGG	1	10.5145	278	1	11.4628	281	1	9.77	278
419	RM10661	GTTGGTGGTCAAGACGAGACTGC	ATTGGCACCCATCACTAATCTGC	1	10.5209	521	1	11.4692	521	1	9.77639	515
420	RM10662	GATCTCAACACACATGCAAACTGG	CTAGCGTATGCAAGGAAGGATGC	1	10.5221	336	1	11.4704	320	1	9.7776	322
421	RM10664	ATCCATGACCTGATCCTGAATCC	GACTTGACCAAACCCACAAGTGC	1	10.6109	97	1	11.6091	101	1	9.8627	97
422	RM10665	CCTGCTGCAATTGATGACAAGC	TGGACAGAATGAAGCATCTGTGG	1	10.6111	372	1	11.6094	389	1	9.86297	352
423	RM10666	CCTGCTGCAATTGATGACAAGC	TGGACAGAATGAAGCATCTGTGG	1	10.6111	372	1	11.6094	389	1	9.86297	352
424	RGNMS300	GACCGATCGATATGATGAAAGT	AGTCTTTACCAATCCAAATTAAAC	1	10.713	127	1	11.701	127	1	9.95981	127
425	RM10673	TCGAAGGGTCCGACCATGAAGG	CCATGCTGCGCGACTACTACGG	1	10.714	159	1	11.702	159	1	9.96084	159
426	RM10680	CGAACTAGGGTTAGTGAGGTGAAGG	AAACCCGGAGGAGGAGGTAGC	1	10.8706	267	1	11.8196	257	1	10.0485	267
427	RM10681	CGAAGAGCAGCCACATAACAAGC	TAGAGACGGTTGGGAGTTGTTGG	1	10.8776	199	1	11.8267	199	1	10.0555	199
428	AUT10682	CCATTTGCAGTATGAACCATGC	ATCATGCAATAGCCGGTAGAGG	1	10.8874	198	1	11.8364	209	1	10.0644	198
429	RM10683	CTTTCGATCCCTTCCTTCTTTCC	GACAATAATAGGCCGAACGTAAGTGG	1	10.9176	489	1	11.8523	464	1	10.0822	781
430	RM10685	TATCGGACTCTACTGAAACACC	GTGTACTCCCTGCATTTCTAGG	1	10.955	163	1	11.8944	163	1	10.1165	163
431	RM10686	GCAACCTATAGCTAGAGAGCTACTGC	CAACTCTCAACTCCCTTACTTCTCG	1	10.9593	173	1	11.8987	122	1	10.1207	169
432	RM10694	TTTCCCTGGTTTCAAGCTTACG	AGTACGGTACCTTGATGGTAGAAAGG	1	11.0189	194	1	11.9539	198	1	10.1802	194
433	RM10695	CCTTCGACTCCATGAAACAAACG	TCTCTTTGCCCTAACCCTATGTCC	1	11.0307	294	1	11.987	255	1	10.192	677
434	RM10696	CCTTCGACTCCATGAAACAAACG	TCTCTTTGCCCTAACCCTATGTCC	1	11.0307	294	1	11.987	255	1	10.192	677
435	RM10698	TCGACATCTTGGAGAAGAAGAGG	CATCTCCACAGCATCACACACC	1	11.0349	78	1	12.048	78	1	10.1964	78
436	RM10699	TCTGACGTGACGAATGACTCAGC	GTCCTCATCCATGGGAGTTGG	1	11.0355	285	1	12.0486	285	1	10.197	285
437	RGNMS319	GAGAGTGTTGTAATGTTTGTGATT	TGATGGAGGTACAACTGTAGAAG	1	11.0474	116	1	12.0618	116	1	10.209	116
438	RM10701	GAGACACGGCACAATATACAACG	TTCTATCTCCGACCTCTTCTCAAGG	1	11.0759	69	1	12.0908	73	1	10.2374	69
439	RM10702	ACGATAAATCAAGCGGCTACTCG	CTTTCAGCAGCACCTTCTCAGG	1	11.1062	317	1	12.1231	243	1	10.2677	255
440	RM10710	GCTTCGATCGATGAGAAAGTAGAGG	GAATCTCCCATCCTTCCCTTCC	1	11.2101	172	1	12.2374	175	1	10.3638	172
441	RM10711	GCTTCGATCGATGAGAAAGTAGAGG	GAATCTCCCATCCTTCCCTTCC	1	11.2101	172	1	12.2374	175	1	10.3638	172
442	RM10712	TTGACCGATTCTAACCTGTTGACC	GAGTCGGTAGAGCTCAAGAAGTGC	1	11.2235	167	1	12.2554	700	1	10.3772	143
443	RGNMS348	TTAGGATTATGGATTTGTAGGAAA	GCCATGAAACATAAACATAAACTA	1	11.27	192	1	12.2954	192	1	10.4225	192
444	RM10713	ATGAACCCGGCGAACTGAAAGG	CTGGCTCCCTCAAGGTGATTGC	1	11.2824	144	1	12.3078	144	1	10.4349	144
445	AUT10715	GTAATCCATGCGATGGGACACG	AGCGCGCATAATCCCTACTTTGG	1	11.288	459	1	12.3134	465	1	10.4404	453
446	RGNMS111	GTACGTAACGTGAATACGTGATA	ATCGATGGAGCAAACTAATAAA	1	11.3646	200	1	12.3882	200	1	10.5052	200
447	RM10718	TAACTCGCCACCGATGATTTCG	CGACCAACGTGCAATAGTACAAGC	1	11.3914	93	1	12.4094	93	1	10.5365	95
448	RM10719	GAGGACGAAGGAGAAGGACAAGG	CGAGCCCATCTGATGTGAGACC	1	11.4041	163	1	12.4221	163	1	10.5483	163
449	RM10720	GCAAACGTCTACGTGAGAAACAAGC	GCATGTGGTGCCTTAACATTTGG	1	11.4437	204	1	12.4723	194	1	10.5871	162
450	RGNMS378b	CTAGATCTGCTTAGTTCACTGGTA	TGCTTCAACCATATATCACTTTAT	1	11.4746	308	1	12.5045	308	1	10.6178	308
451	RGNMS366	GATGAACTTAACATACTGCCATT	TAAGTTACAGTAATCTCAAACCCA	1	11.4747	370	1	12.5046	370	1	10.6179	370
452	RM10724	ACATTTCCCAGGTTTGACTACGC	TGTAAGTCTGGTCAAGCATTGAGG	1	11.4816	480	1	12.5116	478	1	10.6249	478
453	RM10725	TGAGGCTACTTACCTACGATGTGC	GTCTGACCGCACACATAACACC	1	11.505	491	1	12.5265	486	1	10.6388	495
454	RM10726	TGAGGCTACTTACCTACGATGTGC	GTCTGACCGCACACATAACACC	1	11.505	491	1	12.5265	486	1	10.6388	495
455	AUT10740	TGATGGATCTCTGAGGTGTAAAGAGC	TGCACTAATCTTTCTGCCACAGC	1	11.7267	99	1	12.5972	105	1	10.7575	97
456	RM10741	AGGTCGCCTGAGTTTCATACCC	TGTGCGGTTTAAGATAGAGTGAGC	1	11.7791	195	1	12.6751	195	1	10.8092	195
457	RM10742	GTAGGAGCTCCACGCTAGTTTCC	ACAACTTGGAAGGTACGGACAGG	1	11.818	272	1	12.7212	564	1	10.8496	276
458	RM10745	TGACGAATTGACACACCGAGTACG	ACTTCACCGTCGGCAACATGG	1	11.8581	188	1	12.7616	184	1	10.8894	184
459	RM10746	ATGACTCTTCGCCATTCCATAGC	ACCATGGTCAGCCATCACTAGG	1	11.8823	172	1	12.7856	194	1	10.9068	168
460	RM10747	TTTCACCATTTCGTCGGCATTGG	CAAACGCATCAAGCCATGAGACC	1	11.9	95	1	12.8033	73	1	10.9282	81
461	RM10749	CGATGTAGTCGATGTGGATCAGG	TATGGTCGGATCAGCGTAAGTCC	1	11.946	287	1	12.8581	215	1	10.9686	290
462	RM10750	GTACGTAAATCGGGCGCTGACG	GCTTGTGAGGCCTAATTTGAGTTGC	1	12.006	490	1	12.9259	492	1	11.0267	490
463	RM10753	AGGTGGTGGGCTGTAGCTATCC	GGGCCCACCTGTCATATATACCC	1	12.0268	181	1	12.9538	175	1	34.1009	187
464	RM10754	GCAGTAGCAGCGGTAGGAGTAGC	CCTGCTGCCTTGAATTGAACC	1	12.0416	135	1	12.9611	135	1	34.1082	135
465	RM10757	GGCGCTAGTTATGGTAGAGATTTCG	AACAAATCTAGCGGCTGTTTCC	1	12.1018	157	1	13.0291	157	1	11.0821	157
466	RM10763	AGATGTCGCCTGATCTTGCATCG	GATCGACCAGGTTGCATTAACAGC	1	12.2379	237	1	13.165	150	1	11.1945	172
467	RM10764	AGATGTCGCCTGATCTTGCATCG	GATCGACCAGGTTGCATTAACAGC	1	12.2379	237	1	13.165	150	1	11.1945	172
	RM493	TAGCTCCAACAGGATCGACC	GTACGTAAACGCGGAAGGTG	1	12.2811	210	1	13.2169	234	1	11.2368	210
468	RM10771	AGCATCGTCTCGATGTTCACG	CGAGTAGTTGTTGTCAGTTTGTCACC	1	12.3016	121	1	13.2349	121	1	11.2578	121
469	RM10773	CCACCTATAGAAATAGGTCCATGC	TAGAACATGTCACCATCCAAGG	1	12.3047	407	1	13.2379	407	1	11.2607	366
470	RM10774	GGTCTAGCAGCTCTCCCTTCG	GCGATTTAGGAGCGTTTGTAAGG	1	12.3154	389	1	13.2655	387	1	11.2705	389
471	AUT10777	GTACGTAAACGCGGAAGGTGACG	CGACGTACGAGATGCCGATCC	1	12.4238	177	1	13.3769	201	1	11.3668	177
472	RM10778	CCTATATTACGCATGGCAACAACC	AAAGAGGTGCATATCCTTCCATGC	1	12.4333	108	1	13.3871	108	1	11.3767	104
473	AUT10780	CTTGCACAAGAGATGATGATGAGC	CATGCTGAGAAATAGTACGCTTGG	1	12.4444	299	1	13.3971	297	1	11.3869	298
474	RM140	tgcctcttccctggctcccctg	ggcatgccgaatgaaatgcatg	1	12.4445	260	1	13.3971	258	1	11.387	259
475	RGNMS391	CTGTAACGGTTTATGATTTATTTG	GACCAGTATTCATAATGCTACAAC	1	12.4742	152	1	13.4467	154	1	11.4155	152
476	RGNMS392	AAGATAAAGATGATGACCATGAG	TCCTTCATATTGAAAGAGACAGTA	1	12.5069	374	1	13.4915	378	1	11.4481	379
477	RM10782	CTACTGATATGCCCGTACCAACG	CCAAACTGGAGTAGTATTAGGTGTGG	1	12.5499	201	1	13.7014	213	1	11.4831	201
478	RM10794	TATATAGCTGAGGCGAGGCATCC	AAGATTTGGGTCGCTCCGTACC	1	12.7891	354	1	13.9201	355	1	11.6839	351
479	RM10796	ATCCTCTTCTCTGTTCTTCCACTTCC	CTTGTCCCTGCTCCATTCTCG	1	12.8324	76	1	13.9718	120	1	11.7264	78
480	RGNMS437	CTACTGATTTGTTTGTTTGCTAAG	TAATACTAAGCAGGGAGTAGCAG	1	12.8736	327	1	13.969	327	1	11.7598	327
481	RM10798	AATTGGTACGTGGTGGTACAGC	GCCTAATACTAAGCAGGGAGTAGC	1	12.8737	183	1	13.9691	183	1	11.76	183
482	RM10802	CTTCACCCTCTTCAATTTCACC	TTGTGATTCCGCTTTGAGTAGC	1	12.8775	301	1	14.0099	311	1	11.7637	301
483	RM10803	CACTTGCCTCCTCTTGCAACTCC	CATCTCCCTGTCGGACTTGTCG	1	12.8947	99	1	14.0334	96	1	11.7809	96
484	RM10807	AATGCTCTCTCCCTAGCAGCAACG	TCGGCTGCAAATATCCACAGTAGC	1	12.9968	197	1	14.1508	195	1	11.8519	195
485	RGNMS453	TAGGAACTGAGTATCTGGTCAAG	CTACAAGCATTTACCAACAATCT	1	13.0647	344	1	14.2261	344	1	11.9082	344
486	RM10810	GTCAGTCATACCTCCCTGAAGAGG	CGACAAACCTTGATGAGGAACG	1	13.0708	647	1	14.2315	689	1	11.9136	673
487	RM10812	CTGCATGTGTACGAAGAATGAACG	TAGCTGGTTTGTGCCATCTTTCC	1	13.079	165	1	14.3358	139	1	11.9279	125
488	RM10813	AACCCGCTAACAGATTCAAACG	TTGGAAATGTGCTCAACTGACG	1	13.0792	388	1	14.336	358	1	11.9281	360
489	RM10815	CCACCCGCAACTCACTAGTCC	ATCTAAAGTGACCCTGATCGAACG	1	13.2712	207	1	14.4389	207	1	12.0862	207
490	RM10819	ATGATCTCGCAATACTCGATGG	ACGGAATAGAAAGTTGGACAGC	1	13.3806	366	1	14.5502	382	1	12.195	361
491	RM10820	ACCCTAGCTAGCCACCATGAACC	GAAAGCCCTTCTTTCTCCACTCTACC	1	13.4048	263	1	14.5538	263	1	12.2192	265
492	RM10821	CACCCGCGTCTTCTCTTCTCC	CAGTCCCACAGGAACATCTTCTCTCC	1	13.429	184	1	14.5999	184	1	12.2433	184
493	RM10822	ACGCGAAAGCCCTAAATCCAAGC	ACAGTGCCGTACGGTCTTTCTGG	1	13.4342	352	1	14.607	346	1	12.2485	352
494	RM10823	ACGCGAAAGCCCTAAATCCAAGC	ACAGTGCCGTACGGTCTTTCTGG	1	13.4342	352	1	14.607	346	1	12.2485	352
495	RM10825	GGACACAAGTCCATGATCCTATCC	GTTTCCTTTCCATCCTTGTTGC	1	13.4659	97	1	14.6386	97	1	12.2802	91
496	RM10826	CCACCAAGAACCAATCAATCTACACG	CTAGCCATTCCCATGACCAACG	1	13.4663	183	1	14.639	183	1	12.2806	189
497	RM10829	TCATCCGTGGAGCAAGGAGAGG	CCTAGCTAATTGGAGTCCGGGTTGG	1	13.485	122	1	14.6681	119	1	12.3006	119
498	AUT10834	GGAGGACGGGTACATCAAGATCC	CTCGGTTCAGAGCTTGCTTCTCC	1	13.684	450	1	15.0232	448	1	12.4941	450
499	RM10835	GGCACTTTGTCTATTTCCTTCC	GGCAGTACAATCAATCCATACC	1	13.6968	395	1	15.0375	395	1	12.5068	393
500	RM10836	TGGTTGGTGATCATCATGTAGG	TGATGAACACAGTAACCGAAGAGG	1	13.7136	188	1	15.0675	188	1	12.5235	188
501	RM10837	TGCTGTCAATCTGTGCTACATGG	AAAGTGAAGGGCACAAGATAGCC	1	13.714	385	1	15.0679	385	1	12.5239	385
502	RM10838	GCAACAGAGCTAACCACCAAACC	GCCTAATGTTGCTACGGGATGG	1	13.7148	146	1	15.0686	147	1	12.5247	146
503	RGNMS468	GATCATACAGGTTTCTTGGTTTAT	TGATCAATTTATCTACGATACAGC	1	13.7154	156	1	15.0693	156	1	12.5253	156
504	RM10839	ATGCCATGAATGTAACCGAGACG	AGAGAGCAATCCATGCATCTTCC	1	13.723	206	1	15.0823	208	1	12.5329	206
505	RM10843	CACCTCTTCTGCCTCCTATCATGC	GTTTCTTCGCGAAATCGTGTGG	1	13.9373	162	1	15.2739	156	1	12.7434	164
506	RGNMS77a	TAAGGAAGAAGTAGTCTGACATGA	AATATTTATAAGATCGTCCATTCC	1	14.0689	378	1	15.3974	378	1	12.8417	378
507	RGNMS223	AACTCTAGCCCTGATTCGTGTT	AAAGTGTATAAAGACCGTACCAAT	1	14.0698	353	1	15.3983	352	1	12.8426	353
508	RGNMS216	ATGCTCTTCCAAACACCAAATC	AGAGACTCAAGAGTCACACAAGT	1	14.1773	379	1	15.5418	383	1	12.9588	382
509	RM10854	GAAACACCTCTTAGCGAACACACC	GAAGAGGGAGAGTGGAGGCTAGG	1	14.1901	471	1	15.5545	456	1	12.9718	447
510	RGNMS172	ATATTACAGGACAGGGTGAGTAAT	ATTCATTGCTAGTATCAACTCTCA	1	14.2053	331	1	15.5696	331	1	12.987	331
511	RM10861	GATCGAGGAATATGATCCAACTCG	ATTTCTGGTGTGAGCACTGATCG	1	14.3528	279	1	15.7584	209	1	12.9994	217
512	RM10864	GAGGTGAGTGAGACTTGACAGTGC	GCTCATCATCCAACCACAGTCC	1	14.3958	239	1	15.8054	211	1	13.0394	221
513	RGNMS356	ACTTTCTAATGAATTGATGATCG	CAGATTAAGTAAATTACAAGCCAA	1	14.3959	334	1	15.8055	304	1	13.0395	316
514	RGNMS435b	ACAGTACACATTAGATGGGTTGTA	GTATCAGTTAGACAGTAAGAGGCA	1	14.3997	243	1	15.8093	242	1	13.0434	243
515	RGNMS1162	TCTAATATATCTGAACCTATGCCA	CTGAATTAAATTAACAAAGAGCAT	1	14.4373	282	1	15.8376	282	1	13.0815	282
516	RGNMS271	TCTAATATATCTGAACCTATGCCA	CTGAATTAAATTAACAAAGAGCAT	1	14.4373	282	1	15.8376	282	1	13.0815	282
517	RGNMS1195	GTTCTAGTACTTTCTAGTTTGGGC	TGACAAACTTAACTTGCTACCTAC	1	14.496	233	1	15.9323	258	1	13.1385	233
518	RGNMS397	GTTCTAGTACTTTCTAGTTTGGGC	TGACAAACTTAACTTGCTACCTAC	1	14.496	233	1	15.9323	258	1	13.1385	233
519	RM10870	TGAGGCTGTAACGTAGACGATGAACC	AAGCCTGCTAGAGAGGCCCAACC	1	14.5263	234	1	15.9529	193	1	13.1669	162
520	RM10871	TGAGGCTGTAACGTAGACGATGAACC	AAGCCTGCTAGAGAGGCCCAACC	1	14.5263	234	1	15.9529	193	1	13.1669	162
521	RM10873	GTATCGATCGGAGTCGTTTGC	CCCACCTAATAAGTTCGTGTTCACC	1	14.5436	293	1	15.9702	335	1	13.1841	293
522	RGNMS243a	TTGACCGGAGCTCATTTACTAT	TTGTCTAGGCTTACCAATGTATAA	1	14.5871	358	1	16.001	358	1	13.2276	358
523	RGNMS955b	TTGACCGGAGCTCATTTACTAT	TTGTCTAGGCTTACCAATGTATAA	1	14.5871	358	1	16.001	358	1	13.2276	358
524	RM10875	TCCGCAATAAACAGCCACACG	CGTCCGGTACTTCTCCTTGAGC	1	14.59	326	1	16.0237	335	1	13.2305	326
525	RGNMS320	ATCAAATCCCAAATTAAGAATG	CCTATAATTCACCAACTCCACT	1	14.5935	326	1	16.0272	326	1	13.234	326
526	RGNMS214a	AATACTCATGTTGATCTTGATCTG	AGCCCTTTCAACCTAGTACTATAA	1	14.5937	323	1	16.0275	317	1	13.2343	317
527	RGNMS956a	AATACTCATGTTGATCTTGATCTG	AGCCCTTTCAACCTAGTACTATAA	1	14.5937	323	1	16.0275	317	1	13.2343	317
528	RM10878	GGAGGAGAACCCGAAGCTGTCC	GAAGGAGCCAATGGCGAAATCC	1	14.624	168	1	16.0628	168	1	13.2638	165
	RM562	CACAACCCACAAACAGCAAG	CTTCCCCCAAAGTTTTAGCC	1	14.6273	244	1	16.0629	233	1	13.2702	236
529	AUT10881	CAAAGTTCGGATCATCTGTTCG	ACATATCAGGGAAAGCGTCAGG	1	14.6606	152	1	16.1176	138	1	13.2911	156
530	RM10888	AGTGAACGTTGAAAGTGACAGC	CAAGTATTCCTTCCGTATGAGC	1	14.7742	375	1	16.237	371	1	13.4126	373
531	RGNMS1375	TTCAGACAAGTTCAGTTAGATGTT	ACTTTAAATTTCAACTTCCTCATT	1	14.8798	397	1	16.3089	398	1	13.4963	397
532	RGNMS327	TTCAGACAAGTTCAGTTAGATGTT	ACTTTAAATTTCAACTTCCTCATT	1	14.8798	397	1	16.3089	398	1	13.4963	397
533	RGNMS482	TTCAGACAAGTTCAGTTAGATGTT	ACTTTAAATTTCAACTTCCTCATT	1	14.8798	397	1	16.3089	398	1	13.4963	397
534	RGNMS438	AGAGAATATGCATAAGCTTGTATT	CAAGAAGAAGAGGAAGACACTC	1	14.9032	390	1	16.3379	390	1	13.5196	390
535	RGNMS1210	CTCTCCCTCTCCCTAGCCTCTG	GTTGCGTGTTGGACACTCCCTC	1	14.942	161	1	16.3905	161	1	13.5767	161
536	RGNMS1268	CTCTCCCTCTCCCTAGCCTCTG	GTTGCGTGTTGGACACTCCCTC	1	14.942	161	1	16.3905	161	1	13.5767	161
537	RGNMS1330	CTCTCCCTCTCCCTAGCCTCTG	GTTGCGTGTTGGACACTCCCTC	1	14.942	161	1	16.3905	161	1	13.5767	161
538	RGNMS315b	CTCTCCCTCTCCCTAGCCTCTG	GTTGCGTGTTGGACACTCCCTC	1	14.942	161	1	16.3905	161	1	13.5767	161
539	RGNMS1217	GAGGGAGTGTCCAACACGCAAC	GATAGTCGACAAGCAGAGGAAG	1	14.9422	392	1	16.3907	392	1	13.5768	392
540	RGNMS1325	GAGGGAGTGTCCAACACGCAAC	GATAGTCGACAAGCAGAGGAAG	1	14.9422	392	1	16.3907	392	1	13.5768	392
541	RGNMS1346	GAGGGAGTGTCCAACACGCAAC	GATAGTCGACAAGCAGAGGAAG	1	14.9422	392	1	16.3907	392	1	13.5768	392
542	RGNMS141	GAGGGAGTGTCCAACACGCAAC	GATAGTCGACAAGCAGAGGAAG	1	14.9422	392	1	16.3907	392	1	13.5768	392
543	RGNMS254	GAGGGAGTGTCCAACACGCAAC	GATAGTCGACAAGCAGAGGAAG	1	14.9422	392	1	16.3907	392	1	13.5768	392
544	RGNMS447	GAGGGAGTGTCCAACACGCAAC	GATAGTCGACAAGCAGAGGAAG	1	14.9422	392	1	16.3907	392	1	13.5768	392
545	RM10927	TGGATCCCACTAATCCAAATGC	GAAAGACTCCTTCCAATGTTAGGC	1	15.6382	152	1	17.0475	154	1	14.0185	150
546	RM10929	GACAATCGGACTCCTAAATACAGC	AGCTGTTAAGGGTAGCAGTGTGC	1	15.733	374	1	17.2484	374	1	14.1114	378
547	RM10930	AATTGGACTTTACGAGCCTGTGC	TCTCGTCCTCACCTCAAGAGTGG	1	15.7789	272	1	17.3352	287	1	14.151	266
548	RM10940	GTGATTCAGCCTTAGCAGATGG	ATCTTCTCCGAGGTATACTCAAGC	1	16.0428	184	1	17.513	188	1	14.3569	172
549	RM10941	GAGGGTTTGTAGGATGACATGTGG	TAATGGCAGAGGAGATTGCTTGG	1	16.0663	131	1	17.606	128	1	14.3796	131
550	RM10951	GCGCACGTACATACTACTGAAGG	TAGATTTGTACGCAGGACTTGG	1	16.1653	673	1	17.7203	969	1	14.4589	673
551	RGNMS24	ATATGTTACTGATGTGTCATTGGT	TTCAATAGTGTAACTGAGGAGGTA	1	16.2846	260	1	17.8255	260	1	14.5748	260
552	AUT10954	CTATTGGGCGTTGGTCTAGTGG	CAACGAAATCATCCCTAGCTTCC	1	16.3277	274	1	17.877	278	1	14.6119	276
553	AUT10956	GGACAGTTTACAAGCATGGGAGTTGG	TGTAGGGCCCAAATTTAGTGATAGGG	1	16.3444	139	1	17.9341	149	1	14.6285	139
554	RM10958	CGCTTTCCAAACTGCTAAACGATGG	ATGCGGCGAGATGGAGGAAGG	1	16.3806	286	1	17.9927	286	1	14.6648	286
555	RM10962	GTAGATGGAGTCGTGGTTGATCG	TGACAGACGAGGAAACAGGAAGG	1	16.5242	614	1	18.1815	597	1	14.7785	614
556	RM10965	AGCTCAAGGCCTCTAAACTCCTATCC	GCAGACGATGAGGATCCATGC	1	16.5573	81	1	18.2212	81	1	14.8078	81
557	RM10968	TCCTTCACCTCCGCCTCAAACC	CCATGGAGACTAGGTGGAACTTGAGG	1	16.7122	117	1	18.4169	117	1	14.9645	117
558	RGNMS35	ATGTGTTAATGACATATAGATCCG	TAGAAATACGTAGCCAAAGATACA	1	16.7256	392	1	18.4303	392	1	14.9777	392
559	RM10973	ACTCGCGCTCAGGCTTATCTCC	CTGGCAGCCGACAAAGATACG	1	16.9379	176	1	18.5733	182	1	15.1602	176
560	RM10974	ACATCGATCACACAAGAAGCCAAAGG	GGCATGCAACATGGACGCTACC	1	16.9528	195	1	18.6778	195	1	15.1751	195
	RM466	TCCATCACCACATTCCCC	ACCCTTCTCTCGCTCTCTCC	1	17.2779	229	1	18.9862	229	1	15.6655	227
561	AUT10987	CCTCACCATTGATCTCCATCACC	ACTTGCCCTCCTCTTCTCAACG	1	18.9347	190	1	18.9862	190	1	15.6656	188
562	RM10989	GGAAGAGTGCTCTAGTGGCAAGC	ACCAAACAAGCCCTGAGACATCC	1	18.9495	247	1	19.0029	238	1	15.6801	209
	RM129	TCTCTCCGGAGCCAAGGCGAGG	CGAGCCACGACGCGATGTACCC	1	19.0098	204	1	19.3745	184	1	16.0401	201
563	RM10998	TAATCTGGTAAGGCGGTTGAGAATCG	CTGCCACCACGGAGATACTAACATGC	1	19.3534	335	1	19.5219	314	1	16.1874	327
564	RM11007	GTGCGGCTGTTAATGTTGATGC	TCAACAGGAGGAGACAGTACCTACG	1	19.6115	472	1	19.9299	430	1	16.4331	1253
565	RM11008	TTTGGATGGTCATTAGCCTCTGG	ATCAACCTTGCATGCTGTCTTCC	1	19.6318	262	1	9.99483	247	1	16.4541	262
566	RM11009	GATTGACGACTCACGCTGGGTAGG	CCTGCATGATTGCCTCGCTACG	1	19.6735	282	1	19.9972	270	1	16.4956	282
567	RM11010	GGATTGGGATTGTTGGGCTACC	CCTGCACAATAAATACGGTGTCTCC	1	19.674	225	1	19.9977	221	1	16.4961	220
568	RM11011	GCGAGGTGACCTTGTCGTGTGG	GCGGTAGGCGGACTTGATCTCC	1	19.6989	180	1	20.022	180	1	16.5205	180
569	RM11014	TCCCAGTTTCTCCCTCTCTAGCC	TGGGCATGCAATTCTATCTTGG	1	19.7613	155	1	20.0912	155	1	16.5845	155
570	RM11019	AACTCTTCAGTTGCTCACATCC	GTGTTGGCTTGGAAGTAGTGG	1	20.064	197	1	20.4967	197	1	16.8302	200
571	RM11020	CGCCCTGATAATAGGGTCTATCG	GGCTACGCTTATCTACGGATGG	1	20.0656	433	1	20.4983	443	1	16.8318	447
572	RM11023	CGCGAGATCAAAGACGAGAATCG	CGACGCCTTCTTCCTCCTCTCC	1	20.0958	420	1	20.5834	423	1	16.8617	420
573	RM11024	ATACACCTAGAGGCCTGGACACC	TGCTCGTTGAACTGTGACGTACC	1	20.1347	289	1	20.646	243	1	16.9007	375
574	AUT11029	CCAAGTTTCAGGGAAACCAACC	GCTTCTCCCTCTCTGCTTGACG	1	20.2517	186	1	20.8242	186	1	16.9976	184
575	RM11030	ACCTGTCTGCAGATTCCAAGATACC	TGGCTCGATCGATCTACTCCTACC	1	20.2827	280	1	20.8575	276	1	17.0282	145
576	RM11031	CATCGTCTTCATGGAAGCAACC	CCAGCAGAGAGACTGTTTGTTACG	1	20.3093	175	1	20.8816	192	1	17.0545	173
577	AUT11035	CATAGATCAGATGCCAAGAGTGC	AGAGGAGAGGATGAACATGAGG	1	20.4134	340	1	21.0376	336	1	17.1647	884
578	RM11036	ACACACCACACTGTTCCTCTCG	TCTGACATCAAAGGCTCAAAGC	1	20.4201	386	1	21.0442	404	1	17.172	386
579	RM11039	CAAGCAGCTGAAATCTGTTTCG	GCGAGCGTAATAGAGGGATTGC	1	20.4448	462	1	21.0737	462	1	17.1959	462
580	RM11040	CGTACGACGAGTAGAAGCTGAGAGG	AACTCAACACCAAGCTCGATTGC	1	20.4749	256	1	21.0998	248	1	17.2197	254
581	RM11041	CCAACATGATCGACCGCTACACG	AGCGATCAATGGCGATCAACAGC	1	20.4859	156	1	21.1117	148	1	17.2307	156
582	RM113	caccattgcccatcagcacaac	tcgccctctgctgcttgatggc	1	20.4902	150	1	21.1214	150	1	17.2342	150
583	RM11042	CAACGTGCGATCTGGCTACGC	CGTACGTCGCGTGTTGGAATGG	1	20.4957	99	1	21.1269	99	1	17.2397	99
584	RM11043	GCCTCTGAGACGTCTTCTTCTTCC	CTGCCAATAAGCTTCATCCTTGC	1	20.4958	178	1	21.1271	178	1	17.2399	178
585	RM11044	CAAGCTATTGATCCTCCTTGTCG	AGTTAAGTGGGCTATGTGTGTTGC	1	20.5202	264	1	21.1531	276	1	17.2643	272
586	RM11045	GAGGAGGACGAGAAGGATCTGG	CTCGAAGGAGGTGTAATGCTTGC	1	20.5807	269	1	21.252	269	1	17.3216	269
587	RM11046	GAGGAGGACGAGAAGGATCTGG	CTCGAAGGAGGTGTAATGCTTGC	1	20.5807	269	1	21.252	269	1	17.3216	269
588	RM11049	GGGCTTTGGAGAGCTCGAAGTAGC	GGCTCTAGCTCCCATCGCATCG	1	20.6255	190	1	21.2911	190	1	17.3618	190
589	AUT11051	TCTCTACCACCGTCTTCTCTCTCC	CTGAACGCAGCCACATCTAAGC	1	20.6563	391	1	21.3347	394	1	17.3915	383
590	AUT11052	TCTCTACCACCGTCTTCTCTCTCC	CTGAACGCAGCCACATCTAAGC	1	20.6563	391	1	21.3347	394	1	17.3915	383
591	AUT11053	CACTCCACGCCATCTCTCTCG	CTCAGACTCGGAGCTCATCTTCC	1	20.6666	161	1	21.3745	143	1	17.4007	158
592	RM11054	TAAGACGGACGTGGTCTTCAGG	GGATTGATCCAACGTACGAGTGC	1	20.6822	152	1	21.4839	132	1	17.4168	150
593	AUT11056	GGAACAAACGAAGCCTTAGTGG	GGACCCATTGTATCTGGTATTACGG	1	20.7345	214	1	21.5193	204	1	17.4746	172
594	RM11058	CGTTAATGCCGAATCAATCTCC	GAACTAGAGGAGAGTCCCTATTGACC	1	20.7576	172	1	21.5784	165	1	17.4971	167
595	RGNMS51a	TGAAGTTTCTATGAGGTTGAGTAA	TATATTGAAGGGATGATATTTGAA	1	20.787	187	1	21.6098	187	1	17.5456	187
596	RGNMS92b	AGTTGGTCACAACTCCAAGTCT	ACTCCTTTCCATAACATTTCTTAC	1	20.8573	378	1	21.7108	378	1	17.6165	377
597	RM11060	AAGCTTGCGTAGCGTAGGTGGTAGG	CCGGAATATTCTCACCGACCTTGC	1	20.8583	157	1	21.7118	156	1	17.6175	157
598	RM11062	CCGAATCGTGGTGGTGTGAGC	GCGAGCTCGATTCCTTGCTTCC	1	20.9792	219	1	21.8326	223	1	17.7235	211
599	RM11063	GCGAGGAGGAAGCAAGGAATCG	ACCTCCAACGGCCGAAACTCG	1	20.9794	93	1	21.8328	95	1	17.7237	91
600	RM11069	GGTACAATGAAGCTTGGCAACG	CGGTGGAGTAGAACCACGAAGC	1	21.0282	279	1	21.9186	202	1	17.7722	231
601	RM11070	TCCCTACTCACTCTTTCTTCTGC	TGTACGGAGTGTGTAAGAGAAGC	1	21.0452	159	1	21.9379	127	1	17.7918	131
602	RM11084	CATTGCCTCAGATTGACAAAGC	CAGAAGAAACCAAGGCAATTCG	1	21.3509	199	1	22.1583	197	1	17.9901	193
603	RM11089	CCCTCCCTATACACAGGTAGAACC	CCATGCAGTTCTGAAACTGAACC	1	21.5373	386	1	22.2145	386	1	18.1971	392
604	RM11096	AGGGAAGGGAAGTATGTATGTACACG	TATGAGTGATGCCAGCTCAATGG	1	21.684	418	1	22.3759	349	1	18.3192	355
605	RM11097	GTAGTCCAAACCAGGCCACTCAGG	GTTTGCGTTTGCGTTGTCAGG	1	21.6899	169	1	22.3817	168	1	18.3252	169
606	RM11098	CATCATCTACTCCCTCCATACTCG	CCCTACATACTCGTAAAGGAAGTCG	1	21.7168	265	1	22.4741	265	1	18.3524	257
607	RM11108	ATCTCGAGAGGTCAGAGGAAGTCG	AGCTCCAGCAACAGCAACAGC	1	21.8977	361	1	22.5737	361	1	18.5098	361
608	RM11109	GACGAAGGGAAGAGAGGTAGC	GCACACAGTAGTACAGAGATGACG	1	21.9	238	1	22.5759	226	1	18.5121	246
609	RM11110	ATGAGGCTTTGCAGCATGAGG	CCAAGCAAGGCAGTAGCAGTAGC	1	21.9991	175	1	22.7	177	1	18.6129	175
610	RM11111	CTGTTGTCGGTTACACCTTGTGC	CCACTCCTCTATAGCGTCATTCACC	1	22.0568	459	1	22.7525	516	1	18.6574	861
611	RM11113	GTCTTATCTCATTTAGTCCCGGTTCC	TGGAGTAGGGTTAGGGTTTGTGG	1	22.0766	213	1	22.7837	260	1	18.6773	221
612	RM11122	GGAGCATATTGTTCGAAGTGTTGG	TACAGCCAATTCCTTCCATACCC	1	22.1553	560	1	22.8732	548	1	18.7515	547
613	RM11124	GAAGTCGGAATCGGAATAGGC	TGGGCCCAGATAGATAGAGAGG	1	22.1792	75	1	22.8915	83	1	18.7694	75
614	RM11127	TGGAAATGCACCGACAAACTAGC	ACCTCCTGCTGGTCAAATGAAGG	1	22.2411	252	1	22.9534	250	1	18.8254	244
615	RM11128	TGGAAATGCACCGACAAACTAGC	ACCTCCTGCTGGTCAAATGAAGG	1	22.2411	252	1	22.9534	250	1	18.8254	244
616	RM11130	CTCCAAGAAGCATCAGCGTCAGC	GCGGAGTTGGTCATGGAGAGG	1	22.2523	272	1	22.9673	272	1	18.8366	272
617	RM11132	GGAGGAAGAAGACGAGGAGAAGG	CTTGGATGTCCATCTTGGAAGC	1	22.2875	115	1	23.002	118	1	18.868	115
618	RM11133	GTCCCGGGATTATTTACGTTGG	TCATTATCAATCCCGTCCACTAGC	1	22.2973	162	1	23.0119	162	1	18.8787	158
619	RM11134	GACGGCCACCACGTATAGTACC	AGCTGAAATCACCGAATGTTGC	1	22.2986	288	1	23.0131	286	1	18.88	666
620	RM11135	CAGATGGCCACCACGTATAGTACC	GATGTCGCAATCTTTGGTTTCC	1	22.3091	251	1	23.0318	245	1	18.8912	260
621	RM11138	CACTACCAGTACTGTTCCCTACTTCC	GCCTAATGGGTTCTGTACCTACG	1	22.3256	656	1	23.0488	686	1	18.9077	647
622	RM11139	GCATGATGCGTTCGTGTATTCC	CATGCATGCAGGCGTTAGTTACC	1	22.3646	234	1	23.0597	234	1	18.9352	234
623	RM11141	AACGAGAGGACGAGAATCAGAGG	CCATACCTAGGCCCACACAACC	1	22.3865	523	1	23.0939	518	1	18.9571	523
624	RM11156	TACCTCTTGACGTGTCAGTTCTGC	CTCGGTTCTGTTAGCGTAGTTCTGC	1	22.5936	265	1	23.2131	265	1	19.1249	281
625	RM11157	AAAGAGGCGACAGCGAATTATCG	TAAAGCAGCGCCATGATTGTTCC	1	22.5946	260	1	23.2141	266	1	19.1259	262
626	RM11159	GGTGTAACTCAGATCAGTTGAAGG	TGTGTTGGATACAACCTCTTGG	1	22.6505	280	1	23.2595	318	1	19.1658	349
627	RM11160	TTTCTCCATGCTTATGGTGTGG	GCATGATGGATCATATCGTCTTCC	1	22.6931	96	1	23.3184	108	1	19.1982	96
628	RM11161	ACCACCCTTCCCTGTGGTACG	CTTCTACGAGGCCACCGTCTCC	1	22.7033	253	1	23.3286	253	1	19.2084	259
629	RM11162	AGTCCACCCAGTCCGTCAATGG	GAACACTCCTCCTCTGTTCTCACTCG	1	22.7143	131	1	23.3338	131	1	19.2131	107
630	AUT11165	CTCCGTATTGACCGTTCTTCTGC	GGATTTGGGCTCTAGGGTTTGG	1	22.7757	282	1	23.3954	282	1	19.2701	282
631	RM11167	GAGGAGACGAGACGTCAGTAGGG	GTACATCACACACGCGTTATTTGG	1	22.7851	160	1	23.4046	160	1	19.2794	160
632	AUT11168	CGAATACTCCAGACGGAACTACAGG	CCATGAATCCCGAGTAGTAAGTCTCC	1	22.803	74	1	23.4226	74	1	19.2974	74
633	RM11169	CCTGCAACTTAAGCTTGTTGTCC	GAAAGCGAAACACGACATAGTCC	1	22.8077	266	1	23.4272	269	1	19.3021	263
634	RM11170	CCTGCAACTTAAGCTTGTTGTCC	GAAAGCGAAACACGACATAGTCC	1	22.8077	266	1	23.4272	269	1	19.3021	263
635	RM11172	CTCGTCTACCCTTCCCTCTCTGC	CGGCGAACAAGCATAACTAGTGG	1	22.8328	284	1	23.4518	284	1	19.3272	284
636	RM11173	AGGAGGATCCTGTAGCCATCACC	CTGTTAATGTCGGCGATCTTGG	1	22.8386	192	1	23.4576	192	1	19.333	192
637	RM11174	GCCCTATCCCAATTCCCAACG	CGCGCGAATTACTACTACGAAGACG	1	22.8522	390	1	23.4719	381	1	19.3467	390
638	RM11189	CTGGATCTGGATGCCAGCAAGG	GGTGGGTCCGTCTATGGATGAGC	1	23.3	87	1	23.8914	101	1	19.5495	87
639	RM11191	GGTCTCACATTGGACAACACATTGC	CTTCCCGGAAACCCTAGGATGC	1	23.3445	170	1	23.9912	170	1	19.5941	170
640	RGNMS220	TTTAGCTAGATAGATTGGAGACG	TCATCAAACTGATCAGAACTAAAT	1	23.3446	284	1	23.9913	279	1	19.5942	283
641	RM11192	CTCCTCTGACTCGTTCGCACTGG	AACACCGGCTGTCACGTTGAGC	1	23.3454	208	1	23.9921	193	1	19.595	208
642	RM11195	TTACGCTAATGCTTGCTGCTTGC	ATGGAGAAACTGGACGGAGAGG	1	23.4168	84	1	24.0846	84	1	19.6616	87
643	AUT11201	GTCGTCGCCATCATTGGTATCG	CACCTTTCCCGGATCAAGTACG	1	23.5447	196	1	24.1803	194	1	19.768	182
644	AUT11205	CAAGGATAAGGACATCTCTTGC	CTCAGGACCCTGCTTAGATACC	1	23.561	435	1	24.2026	421	1	19.7843	442
645	RM11207	GTGGTGAGTCAGGTGGCAATCC	GCCACCATCTCGTACGTCTTCG	1	23.5956	429	1	24.2573	426	1	19.8229	429
646	RM11208	TAACTGGTCCATGACAGGATAGG	CCTGTTGTACACCTACTTGGTTGG	1	23.6488	388	1	24.3312	375	1	19.8776	382
647	RM11210	ATCGGAGAAATCACAGGAAACG	AGCAAAGACAGAGGGCCATAGG	1	23.6552	174	1	24.3438	156	1	19.8841	174
648	RM11211	CGGGTGGCTATTTCATAAGTTGG	ATGCGGCAAGTTTGTTACTTCG	1	23.6859	198	1	24.3783	444	1	19.9145	199
649	RM11212	CGGGTGGCTATTTCATAAGTTGG	ATGCGGCAAGTTTGTTACTTCG	1	23.6859	198	1	24.3783	444	1	19.9145	199
650	RM11213	TAATAAGGGATTCCGGCCGATGG	CATCGACCCTTCCATCCAATACG	1	23.7394	297	1	24.4345	289	1	19.9582	256
651	RM11214	TAATAAGGGATTCCGGCCGATGG	CATCGACCCTTCCATCCAATACG	1	23.7394	297	1	24.4345	289	1	19.9582	256
652	RGNMS462	GGATTTGACGGTAGAGAAGACT	ATAAATCCACATACACTGTGAGAG	1	23.7555	105	1	24.4533	102	1	19.9743	105
653	RM11219	CGGTACGGACTTGCAATGATGC	CGTAGCATGGCCTTGTGTTGG	1	23.8207	173	1	24.509	227	1	20.039	181
654	RM11220	CACGACGAAGTACTCGAAGATCC	GTAACGAGTCAAACCGAGAGACC	1	23.8371	267	1	24.5255	273	1	20.0554	267
655	RM11225	ATGTTGACAACTGAGAGCGTTGC	TGGACCCTCTTGAAGTAGTTCTGC	1	23.8982	248	1	24.6033	250	1	20.1134	247
656	RM11236	GGGCCTGTACTGTGTCTGTGTAGG	CTTGCTCTTAGTTTCTTAGCCGTTCC	1	24.2184	115	1	25.0323	112	1	20.4028	115
657	RM11237	GATCACTGGCTAATGCAGACAGC	GGACAGCTCCACTGTTCAAATGG	1	24.2377	480	1	25.0598	468	1	20.4215	479
658	RM11238	AGATCTGGAGGGCGCATGAGG	CACCACAGCCTCCAGGATCACC	1	24.2747	127	1	25.1051	130	1	20.4586	127
659	RM11240	TTCCGTCGCTGTGTTCTTCTCC	TGTCGAGGTCCTCTTCGTCTGG	1	24.3018	377	1	25.1357	378	1	20.4862	374
660	RM11241	TGCCTCTGCTTGACTTCACTTCC	TTGTCCTTGACGCATGTAGTAGTCC	1	24.3083	188	1	25.1518	188	1	20.4927	180
661	RM11242	TCGCCTAGTCCAACGCATTACAACG	GAGGTGAGGTTTGCTTCGAGTGAAGG	1	24.3325	198	1	25.1865	191	1	20.5167	198
662	RM11245	AGCGTGAATGCACACTTCTTTCC	ATTCAAACACGGACGACAGACG	1	24.348	334	1	25.2042	452	1	20.5319	324
663	RM11250	CCTCTATATCATGAGAGGCATGTCG	CATAGGAGGTCCATCAAAGTACCC	1	24.4849	405	1	25.4265	405	1	20.7212	401
664	RM11251	TCCCAGCAAATCAATCTCTGAGC	GACGGAGACGGAGAAGAAGAAGG	1	24.5543	198	1	25.5451	195	1	20.7792	198
665	AUT11252	TTTCGGACATGCGTAGTTGTAGG	CGTACGTGAAGCAATAAGGTGAGC	1	24.5841	224	1	25.5885	304	1	20.8091	197
666	RM11254	CACGCAATGCTGTTGGATAGG	AAATCCTTGATGCCCAGAGAGG	1	24.6141	337	1	25.6185	328	1	20.839	337
667	RM11255	GCAGCACAGCTACACCACACTAGC	TCCGTTTCCGAAAGGCTACTCG	1	24.6146	245	1	25.5716	245	1	20.8395	245
668	AUT11256	ACGCGCACCAAGAGAGAAACG	CTCGGCAAGGAACTGGTCAGG	1	24.6155	252	1	25.6199	210	1	20.8403	246
669	RM11257	TTCTAGGAGCGAAGGAGCCTACC	CAAACCCTGCGTATGGATGAGG	1	24.6221	482	1	25.6297	334	1	20.8469	611
670	RM11258	GCTCCACCATTCATCCATACAGC	ATTCGATTGGTTCCTTGGCTTCC	1	24.6546	166	1	25.6735	136	1	20.8806	266
671	RM11259	GTACGAGTTGACGAGGTGGTTGG	ATACGCTTCCCTTTCCATTCTGC	1	24.6655	374	1	25.7121	371	1	20.8915	374
672	RM11267	TTAAGCTCTCGACAATTCCGTACC	CATTCCATGCTCGATGTTAAGC	1	24.7711	266	1	25.7769	262	1	20.9497	264
673	AUT11272	TAGGGTGTCCTATCAGGTGAGG	TTACTACATAGCTACTCCCTCTGTCC	1	24.8669	264	1	25.8348	260	1	21.0015	238
674	RM11273	CGATCCCAGCCGTCCATTTCC	GCGAGGAGGAGGATGCTCTTGG	1	24.942	197	1	25.9182	197	1	21.0662	197
675	RM11274	CGATCCCTCTCACTGCACAAACG	AGGACGGCCAAACTCTGCTTGC	1	24.9452	272	1	25.8928	272	1	21.0694	272
676	AUT11279	GGCCCTCATCACCTTCGTAGC	CGTCCTCCCTCTCCCTATCTCC	1	24.9829	168	1	25.9602	122	1	21.1043	158
677	AUT11280	GGCCCTCATCACCTTCGTAGC	CGTCCTCCCTCTCCCTATCTCC	1	24.9829	168	1	25.9602	122	1	21.1043	158
678	RM11288	CAATATCAGCCTAGCACAAAGG	CTATCCAACCAGCCATTTATCC	1	25.0557	360	1	26.0603	501	1	21.1785	404
679	RM11292	TTCTATGTATGCACGGAAGACG	CGTGGGTAAGTTTAGTGTCACC	1	25.0973	501	1	26.1062	475	1	21.2169	504
680	RM11293	CATCGCTTAGCAATCTCCTTGG	GACAAACGGAGAGGGAAGAGACC	1	25.2264	182	1	26.277	168	1	21.3285	173
681	RM11294	CATCGCTTAGCAATCTCCTTGG	GACAAACGGAGAGGGAAGAGACC	1	25.2264	182	1	26.277	168	1	21.3285	173
682	RM11295	GGCGTACGGGTGTACTAGATAGGG	CACGTACGACCATTTCACAAACG	1	25.381	152	1	26.5363	144	1	21.5161	149
683	RM11296	CGTTCACTGGTGGGTCTCTCC	GACAGAAACGGAGTCAATTCATCG	1	25.3849	280	1	26.51	279	1	21.52	280
684	RM11297	TACATGCAACAGGTGCCGATTTGC	GATCAATTGCCGCCACTCTGTCC	1	25.4186	150	1	26.517	150	1	21.5538	150
685	RGNMS169	ACCTATATGGGCTTAGTCTCTCT	AGAGAACACAAACTCAGACACC	1	25.5001	383	1	26.7083	383	1	21.6353	383
686	RGNMS303	ACCTATATGGGCTTAGTCTCTCT	AGAGAACACAAACTCAGACACC	1	25.5001	383	1	26.7083	383	1	21.6353	383
687	RM11302	CTTAGGCCCACATTTGATGTCC	CCCATCGTTTGCTCATATTCC	1	25.5252	175	1	26.7349	160	1	21.6606	183
688	RGNMS337	CTACTGAGAGCAAATAGATTGAAC	ATTCCCAGTAACTACTAACCAAAC	1	25.5768	103	1	26.8435	103	1	21.7163	103
689	RGNMS398	ACCACACACGGTCACACGTCTC	GAGATGATGGAGAACGAGAAGG	1	25.5866	359	1	26.8532	359	1	21.7259	359
690	RGNMS403	TATATATGGATAATGGGAACATTG	TAATAGGACCACATCATTGAATAC	1	25.5874	275	1	26.854	282	1	21.7267	273
691	RM11307	AAAGCTCTGCAATCTTCTCTCC	GAATACGACATCAGAACAGTGC	1	25.5875	147	1	26.8541	154	1	21.7268	145
692	AUT11309	CACACTCCCATGCTAACAACTGG	CATCAAGAAGAGCAGTCCTGTGC	1	25.6292	193	1	26.9191	185	1	21.7685	193
693	RM5	tgcaacttctagctgctcga	gcatccgatcttgatggg	1	25.6292	193	1	26.9191	185	1	21.7685	193
694	RM5	CACACTCCCATGCTAACAACTGG	CATCAAGAAGAGCAGTCCTGTGC	1	25.6292	193	1	26.9191	185	1	21.7685	193
695	RGNMS13	CAAGTGTATTGTAGTGTGTGTGAG	AAGACAGTGATGGACACTAACAG	1	25.6355	343	1	26.9254	330	1	21.7748	347
696	RGNMS225a	CAAGTGTATTGTAGTGTGTGTGAG	AAGACAGTGATGGACACTAACAG	1	25.6355	343	1	26.9254	330	1	21.7748	347
697	RGNMS237	CAAGTGTATTGTAGTGTGTGTGAG	AAGACAGTGATGGACACTAACAG	1	25.6355	343	1	26.9254	330	1	21.7748	347
698	RGNMS339	CAAGTGTATTGTAGTGTGTGTGAG	AAGACAGTGATGGACACTAACAG	1	25.6355	343	1	26.9254	330	1	21.7748	347
699	RGNMS305	AGAGTAGAGAATGTCTAGTGCCTC	GTACCAACGACAATATATGCTAAG	1	25.6362	267	1	26.9261	267	1	21.7755	267
700	RGNMS64	AGAGTAGAGAATGTCTAGTGCCTC	GTACCAACGACAATATATGCTAAG	1	25.6362	267	1	26.9261	267	1	21.7755	267
701	RGNMS117	CAGTAACCACGAGATATATACGG	GAGGCACTAGACATTCTCTACTCT	1	25.6365	273	1	26.9263	273	1	21.7757	273
702	RGNMS261	CAGTAACCACGAGATATATACGG	GAGGCACTAGACATTCTCTACTCT	1	25.6365	273	1	26.9263	273	1	21.7757	273
703	RGNMS343	CAGTAACCACGAGATATATACGG	GAGGCACTAGACATTCTCTACTCT	1	25.6365	273	1	26.9263	273	1	21.7757	273
704	RGNMS53c	CAGTAACCACGAGATATATACGG	GAGGCACTAGACATTCTCTACTCT	1	25.6365	273	1	26.9263	273	1	21.7757	273
705	RGNMS167	AGGTAGTAGGTAGGAGCAGGAG	CAAGTGTATCGGAGTAGTAGCAG	1	25.637	380	1	26.9269	381	1	21.7763	379
706	RGNMS6	AGGTAGTAGGTAGGAGCAGGAG	CAAGTGTATCGGAGTAGTAGCAG	1	25.637	380	1	26.9269	381	1	21.7763	379
707	RGNMS70a	AGGTAGTAGGTAGGAGCAGGAG	CAAGTGTATCGGAGTAGTAGCAG	1	25.637	380	1	26.9269	381	1	21.7763	379
708	RM11312	CAGGCTAACAGCGGTAGAACACC	GCAAACAAGGCTCGAAAGAACC	1	25.6715	482	1	27.0021	565	1	21.8092	896
709	RM11313	TGAGGCTGATAGAAAGCAGAATGC	CCCGTTTCTTCCATATCATGTCG	1	25.6829	388	1	27.0148	441	1	21.8211	367
710	RM11314	TGAGGCTGATAGAAAGCAGAATGC	CCCGTTTCTTCCATATCATGTCG	1	25.6829	388	1	27.0148	441	1	21.8211	367
711	RGNMS1016	TATACATAAATTGAGGCAAAGGTA	AAAGAAACGTAAACACATGAAGT	1	25.6833	388	1	27.0152	442	1	21.8215	367
712	RGNMS103	TATACATAAATTGAGGCAAAGGTA	AAAGAAACGTAAACACATGAAGT	1	25.6833	388	1	27.0152	442	1	21.8215	367
713	RGNMS1034	TATACATAAATTGAGGCAAAGGTA	AAAGAAACGTAAACACATGAAGT	1	25.6833	388	1	27.0152	442	1	21.8215	367
714	RGNMS378a	TATACATAAATTGAGGCAAAGGTA	AAAGAAACGTAAACACATGAAGT	1	25.6833	388	1	27.0152	442	1	21.8215	367
715	RM11315	CATGAGGTTCTGAGTGGATCACC	TCGATCGATCACGTACCAGTCC	1	25.6946	195	1	27.0235	200	1	21.8331	175
716	RGNMS479	ACTAGTTGACCGTTTCCACTATC	AAACTTACTTCTCTCGGCGAGGC	1	25.7705	322	1	27.1095	322	1	21.9095	322
717	RGNMS1125	GTGGATGAACAGATCAAATAGTAA	AGAACTCATTCGAGGTAGGAAA	1	25.7707	320	1	27.1097	320	1	21.9097	321
718	RGNMS161	GTGGATGAACAGATCAAATAGTAA	AGAACTCATTCGAGGTAGGAAA	1	25.7707	320	1	27.1097	320	1	21.9097	321
719	RGNMS431	GTGGATGAACAGATCAAATAGTAA	AGAACTCATTCGAGGTAGGAAA	1	25.7707	320	1	27.1097	320	1	21.9097	321
720	RM11319	TCACCTCCGGAGTGTAGTAAGC	TCTCTCTCATCTGTGTCGTTCC	1	25.7752	328	1	27.1144	328	1	21.9145	702
721	RGNMS122	AATGTCTTACACCTCTTAATTTCC	CTCAATAGAGAAACATGTACCATT	1	25.7987	386	1	27.1425	426	1	21.9366	366
722	RGNMS239	AATGTCTTACACCTCTTAATTTCC	CTCAATAGAGAAACATGTACCATT	1	25.7987	386	1	27.1425	426	1	21.9366	366
723	AUT11321	TTCATATGGCTCGGAAAGAACTCC	TAGCGGAAACGCGTACGTAAAGG	1	25.7988	351	1	27.1426	391	1	21.9367	331
724	RM11322	CCCACAAGTCAGTGACGCTACG	CCTCCTCCTCCTCCTCTTACCC	1	25.8027	196	1	27.1465	192	1	21.9405	194
725	RM11323	CCACCGCCAGACATCATCTTCG	TTTGCTCCTCCTCCACGCTTCG	1	25.8108	81	1	27.1547	81	1	21.9487	93
726	RGNMS253	GTTAATCTCCTATTAAGGTGTCGT	ATTGCATACTACTAGTCCAGAACA	1	25.8386	209	1	27.1845	209	1	21.9767	209
727	RGNMS467a	GTTAATCTCCTATTAAGGTGTCGT	ATTGCATACTACTAGTCCAGAACA	1	25.8386	209	1	27.1845	209	1	21.9767	209
728	RGNMS206c	GATTTATTCTTATTGACGGTTTCT	ATGTTTAATCAACAAGACATCAAC	1	25.9154	335	1	27.2533	335	1	22.0623	335
729	RGNMS268a	GATTTATTCTTATTGACGGTTTCT	ATGTTTAATCAACAAGACATCAAC	1	25.9154	335	1	27.2533	335	1	22.0623	335
730	RGNMS345a	TTCTCTAGAGTTCTCTCTCTCGAT	TTCATACTAAACACTTGCAGCTAT	1	25.9343	315	1	27.2757	315	1	22.0829	315
731	RGNMS485	TTCTCTAGAGTTCTCTCTCTCGAT	TTCATACTAAACACTTGCAGCTAT	1	25.9343	315	1	27.2757	315	1	22.0829	315
732	RGNMS164	GTAAGTGAACTATGGCTTGTGATA	AAATCTAGAATCTAAGGCAGTCAT	1	25.9552	179	1	27.3031	179	1	22.1037	179
733	RGNMS394	GTAAGTGAACTATGGCTTGTGATA	AAATCTAGAATCTAAGGCAGTCAT	1	25.9552	179	1	27.3031	179	1	22.1037	179
734	RM11325	CGAGACGAGCTGACAACGAAGC	TAACGGCTCGACGACAGTAGAGG	1	25.9912	196	1	27.3514	196	1	22.141	199
735	RM11326	TTTGACCTCGGATGATAGTTCC	CACAAATGACAGGCTTACACTGG	1	26.0145	371	1	27.3759	367	1	22.1643	367
736	AUT11328	ACACCGCACCTAAACCCAAGACC	AGGCGCGTGAGAGAGGAATGG	1	26.0327	184	1	27.4093	175	1	22.1817	186
737	RM11330	TGGATGAAGTCCACCGAGACG	GCCACTTAGCAACAACCACTTCC	1	26.0534	296	1	27.43	294	1	22.2024	294
738	AUT11331	CGACAGTTTCTTCCCTATACTTGG	TTTCATCTTGGGTTCGAGTAGG	1	26.0649	297	1	27.4416	257	1	22.215	265
739	AUT11333	ATTTATGCCTTGGCCACTCAGC	GCAATGCAAGGGATGTTTATGG	1	26.1036	113	1	27.48	110	1	22.2532	101
740	RM11334	ACTCTGCCAAGGTCAAGAACTGC	CTGTCCTCCATGGAAAGATAAAGC	1	26.1039	167	1	27.4803	231	1	22.2535	553
741	RM11336	TTGATCCCTTTGCTTCTCTCTGC	GACCTAGGGCCTGACTAGTGACC	1	26.1255	578	1	27.513	648	1	22.276	564
742	RM11337	TTGATCCCTTTGCTTCTCTCTGC	GACCTAGGGCCTGACTAGTGACC	1	26.1255	578	1	27.513	648	1	22.276	564
743	RM11340	CGCGCGATAGTATTAAATCTGG	GCGACAACCGATAATATGTGG	1	26.1664	284	1	27.5519	220	1	22.3173	224
744	RGNMS108	TGCTCTTCTGGAAATAATATGTAG	AGACATAAATGCATTACATTGAAC	1	26.2193	334	1	27.6141	334	1	22.3706	334
745	RM11344	CTCAGCGAGACACGGTAAATTAATGG	ACACCGAATAGTGGACATTGACTGG	1	26.2594	328	1	27.6493	328	1	22.4132	327
746	RM11346	GACAACAATGGCCTCATCTTCC	GTCGTCGTCCTCGTAGTTCACG	1	26.2689	98	1	27.6742	95	1	22.4232	98
747	RM11351	AAGCATGTGTCATCGTTGTGTAGC	CGCCATATATCGGGCTGTATTAGC	1	26.4102	380	1	27.8149	352	1	22.5725	607
748	AUT11353	AACAACCAGCGTATGCGTTCTCG	CCCACGGCTTTGTAGGAAGAAGC	1	26.4654	109	1	27.871	103	1	22.6248	91
749	AUT11355	GTTCGTTTCCGAGATGTCACTGG	CGGGAGAGGGTACGATGAGTACG	1	26.5231	157	1	27.9436	157	1	22.6841	155
750	RM11356	ATCCTGATTCCTGTTCCTGATGC	CCACTTGTTCAGGGTTCATTTAGG	1	26.5378	358	1	27.9582	310	1	22.699	335
751	RM11357	GATGATCACCCACAGCGATCC	GGACATCTGATTGCGAGGTTGG	1	26.5453	419	1	27.9649	412	1	22.7064	444
752	RM11358	TTGGTGTTTCTGACCGGATAAGG	CTAGTGAGCGCCGGTATTAAAGG	1	26.5477	643	1	27.9721	587	1	22.7088	601
753	RM11359	TCCAACCCTCCTCTCTATAAATACCG	CTCCATGTGTCCTCCTCGTTCC	1	26.5515	180	1	27.9759	183	1	22.7126	180
754	RM11360	TTCGCTTGTGAGATAGCAACTCG	AGTCCAGATGATGACGGTAATGACG	1	26.6074	111	1	28.0341	111	1	22.7682	102
755	RM11361	TGCTAGCTGCCTACCCTCGAAGC	AGGCAGGCATCGGCTATATTCTCG	1	26.6076	250	1	28.0343	234	1	22.7683	240
756	RM11362	TACGTGCGGGCAGTAAATCTGG	GTCGTTCTCTCTCCCTCAAATACACC	1	26.6119	479	1	28.0386	421	1	22.7726	470
757	RM11364	GTGTTAATGGTCCAGGTGTCTGC	CGCGTAATTAAGAAGTGGACTCG	1	26.6261	284	1	28.0527	283	1	22.7868	284
758	RM11366	AAGCTGAAACCCTCCTCACTTCC	GTACACGTAATCAGCGCCTTCG	1	26.6663	174	1	28.1075	177	1	22.8278	180
759	AUT11370	CTCAACCCGGCTTTCCATCTCG	GCTGCAGAGTCTCGCACGTTCC	1	26.7281	186	1	28.188	190	1	22.8878	172
760	RM8129	CTCAACCCGGCTTTCCATCTCG	GCTGCAGAGTCTCGCACGTTCC	1	26.7281	186	1	28.188	190	1	22.8878	172
761	RM11371	GGAGCAGAGGATGGCGTTGTCC	GATTAACGCTCCCACGCCTCTTCC	1	26.7317	326	1	28.1917	326	1	22.8915	326
762	RM8130	GCAGAAAATTTCCATTTAGCATCT	GGATATGACTTACTACTGCAACAAATCT	1	26.7723	290	1	28.2216	172	1	22.9219	198
763	AUT11373	CCATTTAGCATCTAAGGGCTCTTTCC	TGTGGTAGGACTTCTCCGTATTGG	1	26.7723	373	1	28.2216	255	1	22.9219	281
764	AUT11374	CCATTTAGCATCTAAGGGCTCTTTCC	TGTGGTAGGACTTCTCCGTATTGG	1	26.7723	373	1	28.2216	255	1	22.9219	281
765	AUT11375	CCATTTAGCATCTAAGGGCTCTTTCC	TGTGGTAGGACTTCTCCGTATTGG	1	26.7723	373	1	28.2216	255	1	22.9219	281
766	RM11377	AAACCTAACTCAGTGTCCCAGTCG	GGTGTCCTGATGATGATTTACCC	1	26.8195	370	1	28.27	370	1	22.9673	373
767	RM11379	GGCGTGACGGATATTTCTTTCTCC	GCTCTCGTCATCGACGCTACTGC	1	26.848	299	1	28.2842	308	1	23.0082	311
768	RM11380	GCCAACGCCGCATATAACACC	CACGTCAACCAATTCCACTACCC	1	26.884	265	1	28.3298	265	1	23.0353	265
769	RM11381	CTAGCGGATGAAGTGATGAGACG	GCTGGTGGACGTTACTGTGTGC	1	26.9326	168	1	28.3874	168	1	23.081	168
770	RM11382	TCTCACATACTCCGGAATCTTTGTCC	ATCTGCCTGTAAATCGCGAGACG	1	26.9328	364	1	28.3876	364	1	23.0812	366
771	RGNMS195	CATTTCTTTCTTTAATTGCCAG	GTGTAGATTGGGAAATTTCAGT	1	26.9388	775	1	28.3936	782	1	23.0874	779
772	RM11383	CTCTCCTTCACTTCTCCCTGATCC	AGCAATGGCGATGGAAGTAACG	1	26.9388	123	1	28.3936	130	1	23.0875	127
773	RM11393	TTGGTTGATGGGCAGGAGAAGG	AGCAATAGGCAAGATGAGGAAGTCG	1	27.0228	393	1	28.496	395	1	23.1692	292
774	RM11394	TTGGTTGATGGGCAGGAGAAGG	AGCAATAGGCAAGATGAGGAAGTCG	1	27.0228	393	1	28.496	395	1	23.1692	292
775	RM11395	TTGGTTGATGGGCAGGAGAAGG	AGCAATAGGCAAGATGAGGAAGTCG	1	27.0228	393	1	28.496	395	1	23.1692	292
776	RM11396	CCCGCAGTAAGGAACACATCC	TATGGTCCAGGAACGACTTGAGC	1	27.0253	166	1	28.4985	169	1	23.172	166
777	RM11397	CTCCTCCTTCCCTCTTTCCATGC	GTCACCAGTGACGGAGAGAGTCG	1	27.2462	240	1	28.6397	231	1	23.2965	237
778	RM11404	GGAGAGCGTCGATGAGATGAGG	CATGAGGGCATTTGATACTTCAGG	1	27.4743	297	1	28.974	297	1	23.5177	301
779	RM11407	TGATTAAGGGTAGGTACCAGAGTGC	GCAGCATACATCCCTCCTTAGC	1	27.6116	270	1	29.0809	262	1	23.6394	244
780	RM11408	TGATTAAGGGTAGGTACCAGAGTGC	GCAGCATACATCCCTCCTTAGC	1	27.6116	270	1	29.0809	262	1	23.6394	244
781	RM11410	CATAACCCTGAAGTGGTGTGACG	GTGCTTGATGATATGGTCCTTGC	1	27.6384	147	1	29.1019	137	1	23.6612	147
782	RM11411	TAAGTGCTATTGTGGTTGACCCTTCG	AAACGGCGTTGTTTCTCTGAGG	1	27.7123	431	1	29.1575	375	1	23.714	375
783	RM11412	CCCATGGTCCAAGCCTAAAGC	CGCCACAAAGCATGCAAATACC	1	27.741	182	1	29.1898	156	1	23.7438	156
784	RM11414	GGAAAGTAGAGAGAAGAACTCAGC	CACTACTTGTAGGTCAACATACCG	1	27.7613	480	1	29.2133	480	1	23.7647	480
785	AUT11417	ATGTTGTCGAGTCGTGGTAATGC	TATTCCTCGGTGTATGGGTCTCC	1	27.7979	184	1	29.2566	184	1	23.79	182
786	AUT11425	GATTCCATAGCTGCGTGATTCTCC	AGATGAAACTGGCACGTGTGTCG	1	27.8989	106	1	29.3533	114	1	23.8846	102
787	RM11427	CCGTCATTGTCAAACACCTTAAGTCC	TCATATGTAGCAGTGACATGGTGTCC	1	27.9553	256	1	29.3729	256	1	23.9407	228
788	RM11430	GGAACTGCAGATTTGATGGAGAGG	CATATTCCACTGGGCGTCTGG	1	28.0524	96	1	29.4955	96	1	23.9769	88
789	RM11431	GGTGAACAAGTTCGACGACTGC	TGGCGATGGTACATATCGAAACC	1	28.0586	184	1	29.5017	184	1	23.9831	184
790	RM11432	ATCGTGTACGCCGACTGGTACG	ACAAACCAACAGAGAGGAGGAACG	1	28.065	191	1	29.5079	193	1	23.9895	191
791	RM11435	CCAGCAGAAACGCCATACAAGC	GGAGAGGAGGGATCGAGAGTGG	1	28.1156	189	1	29.5399	201	1	24.0226	187
792	RM11437	GCAGTGAGACACCACCAAGAAGG	AAACCCGTGAAATACACCAAGACC	1	28.2415	139	1	29.6975	139	1	24.1548	135
793	RM11438	GCACGGTTCTCTTTCTGTGATAGC	TTTCGAAGACCGTAGTAGCAGTGG	1	28.2427	175	1	29.6988	202	1	24.156	172
794	RM11441	ACTCTAGCACGAATCACAACACC	TGATTCAGCAACTTGGATGAGC	1	28.2694	371	1	29.719	365	1	24.1728	337
795	RM11445	AGGCTGATGATCGCAAAGTTCC	AAAGCATATACCACCAGCCAACC	1	28.3552	151	1	29.7861	151	1	24.237	151
796	RM11446	GAAGCTGATAAAGCCAAGAGG	CTACTCCACCAGTAGAAGTAGGC	1	28.4616	168	1	29.8828	168	1	24.3286	146
797	RM11448	GAAGTGATCATTGGCCTGTTGC	GCATAAACAGCAGGATCCATATCAGG	1	28.5716	170	1	30.0275	168	1	24.4267	180
798	RM11449	AAGTCGACAATGTCATCTCAGG	TTCAGCAATAAGCTTCGCTACC	1	28.577	398	1	30.0328	364	1	24.4321	326
799	AUT11450	AAAGCCTGGATAAGATGGTTCG	CTGTAGTTGCTGTTTGCCTGTCC	1	28.5775	123	1	30.0333	107	1	24.4325	113
800	AUT11451	ACCACCTCCCATGTTTCAAGG	CCGAAACTTTAGCACCTGTGAGC	1	28.6228	254	1	30.0156	254	1	24.4575	224
801	AUT11452	ACCACCTCCCATGTTTCAAGG	CCGAAACTTTAGCACCTGTGAGC	1	28.6228	254	1	30.0156	254	1	24.4575	224
802	RM8128	CATATGAACTTCTAAGGAAGAAA	ATGTACTTAAAGTTCCTGATGC	1	28.623	167	1	30.0158	167	1	24.4576	137
803	AUT11454	GTGGAGGAGCGAAGGGAACACG	CCTCCCATATAAACCGGCGAACC	1	28.663	139	1	30.0869	149	1	24.5467	137
804	RM11456	AGCTCACCTCAACTCCGGAAGC	CTGGGAACCTCCTCGATGACC	1	28.7977	424	1	30.2252	417	1	24.6348	424
805	AUT11459	CACCCTGCAGACACAGTACGC	GAGCTCCGAGAAGCCTCATCC	1	28.8377	77	1	30.2685	77	1	24.6715	71
806	RM11460	GTCGACCTGCCGCTTCTTCAGC	TCGATTTCGTGTTCGTCGTCTCG	1	28.8475	195	1	30.2783	195	1	24.6813	195
807	RM11461	ATTGGCCAAGAATCCCATCAAGAACC	AAAGGCAGCTCGCCCTTCTTGC	1	28.8897	147	1	30.34	143	1	24.7233	147
808	RM11462	GAGCTGCCTTTGCTTCTTTGC	TGTGCTGTAGTGCTCGTCTTTCC	1	28.8899	91	1	30.3402	87	1	24.7234	83
809	RM11463	ACGAGCACTACAGCACACATGC	AATGCTGCAACCTCTTCTTCTCC	1	28.8899	144	1	30.3402	128	1	24.7235	134
810	AUT11465	GCCAACACGAACTCCCGAAGG	CTGCTCCGTCTGCATCGTCTGC	1	28.9276	366	1	30.3752	361	1	24.7613	366
811	RM11466	GCCAACACGAACTCCCGAAGG	AAATGAATTGCCACCTCCTCTCACC	1	28.9276	411	1	30.3752	406	1	24.7613	411
812	AUT11467	TCCATTCCATTCACCATCATCC	ATCAAACGACGGTGTTCGAAGG	1	28.9476	190	1	30.4292	178	1	24.7813	188
813	RM11468	TAATCTGGCTGGACACAGTACG	GTAGCTAGGAGTACATGCTGATAACC	1	28.9508	315	1	30.4319	363	1	24.7847	289
814	AUT11469	GCATGCAAGCTGAGTGTGAAACC	TTTGCTTCCTTGCTTTGCTTGG	1	28.9542	159	1	30.4353	155	1	24.788	155
815	RM11470	CTCGTCCTGGAACTGGTACTCG	CTCCTCTGTCCATCTCCATCTCG	1	28.9549	155	1	30.4361	155	1	24.7887	155
816	RM11471	GCTGGTCTCGCGTAAACTCATCG	AACTCCCTTCCGTACCGAACAAGG	1	28.9574	297	1	30.3739	297	1	24.7912	298
817	RM11475	GAGGAGCTCATGTTAGTGGAGAAGG	TTCAGCTGGAAGCACAACTTCG	1	29.0061	278	1	30.5451	324	1	24.8402	273
818	RM11476	GCGCTATATAATAAGGCGGAGGTACG	CCGATAACACCCAAGCCAAGC	1	29.0341	100	1	30.5856	100	1	24.8682	100
819	RGNMS75	AACAAATTCTGAAGCCTGATTA	TATATAATAAGGCGGAGGTACG	1	29.0344	387	1	30.586	387	1	24.8685	387
820	RGNMS69	TATCTGAACAAATTCTGAAGCC	GCTATATAATAAGGCGGAGGTA	1	29.0344	395	1	30.586	395	1	24.8685	395
821	RM11477	GTTGCCCATTTGTAGCCTCATGG	CCGACAATTAAGGGAGGGAAAGG	1	29.0369	188	1	30.5881	188	1	24.8711	188
822	RM11478	GCCGCGTGGGTATAATTGAAGG	ACCTGGTCTCCAGGCTGAACTCG	1	29.0574	282	1	30.6109	282	1	24.8953	282
823	AUT11479	CGAGCTCCATCAGCCATTCAGC	ACTTGAGAGCGAGATTGGGAATCG	1	29.0921	98	1	30.6456	96	1	24.9302	92
824	RM11480	TCTAAGAATAGCGTGGGACCTATGG	TGTCTTGAGGAAAGAAGCAAGAGG	1	29.1221	196	1	30.688	200	1	24.9534	192
825	AUT11484	GCAAGTCGATAGGCTAATCAATCC	CATGTGTAGTGGGAAGATGTGTGG	1	29.2672	296	1	30.7858	329	1	25.0727	308
826	AUT11486	AGCAGACCAATGAACCATGAACC	GGTTTGGCTAAACTCATGAGAGAGG	1	29.3008	155	1	30.8143	125	1	25.1041	143
827	RM11487	AACTGTCAGGTGGAAGAATGTGG	CTGCACAGATGTTGAAGCGTAGG	1	29.3116	435	1	30.8205	427	1	25.1133	437
828	RM11488	CAGACCAAGGAGGAGAATGAAGG	AGTTGTTGCCTGCACTACACAGC	1	29.3167	403	1	30.8256	373	1	25.1184	371
829	RGNMS230b	GCTCGATCTCTCTCTAATCCTA	GAATACATCAATTCTCACACCA	1	29.3171	233	1	30.826	201	1	25.1188	201
830	RM11490	CCGCGCGAGTTCTAATCTAGCC	GTGACGGGTTTGTTGGTGTTGG	1	29.3371	141	1	30.8462	141	1	25.1387	141
831	RM11495	AGACGCGAACACACAGACAGC	CGTGTATAATAGCGGGCGATCC	1	29.4271	362	1	30.9396	354	1	25.2311	360
832	RM11496	CTCGGCTTGAAGATTGATTTCTGG	ATTCTATGGCCAAGAGTGATGGAACC	1	29.4315	166	1	30.9439	166	1	25.2354	166
833	AUT11497	CGGGTCAGTGAGAGGAGAGAGG	GGTTCGTCCTCCCTGTAGTCTGC	1	29.4582	186	1	30.983	174	1	25.2619	182
834	AUT11501	CGTGAACAAGATTTGTGCCGTTGC	ATACGGCGGTTTCGCACATTCG	1	29.5229	262	1	31.0492	262	1	25.3265	262
835	RM11508	TGTGCTTCATCCAATCACTCTCC	CAAAGTTGCTCCCACTCATGTCC	1	29.5897	174	1	31.1185	188	1	25.3974	156
836	RM11510	CCGACGACCGTAGATCTGAGAGAGG	CTACATGTCCCTGGCCCTGAAACC	1	29.6196	244	1	31.1484	258	1	25.4283	232
837	RM11511	CTATACATCGCCGGAGCCATCC	CAGGAACCCGTCCAGTATCAGG	1	29.6269	166	1	31.1557	167	1	25.4361	158
838	RM11512	TGTGGCAGAAGAACCAATAGGG	CCAGCGAAGGCATTAGAGAGC	1	29.6924	139	1	31.2303	143	1	25.4899	137
839	RM11516	GTGCAGTAGATAGTACACCTTTGAGC	GAACGAGTGAGAAGGATACAGTGG	1	29.7395	457	1	31.2728	451	1	25.5358	451
840	RM11520	TACCTGTGGTGGTGTGCGTCTCC	TCGTACCTCCCGTCGTCACAGC	1	29.7755	478	1	31.3093	478	1	25.5714	478
841	RM11521	CAATGGCATACGGAGTAGTGTATAGG	AGCCAAAGCAGAGTTTCATAGCC	1	29.7813	176	1	31.3151	173	1	25.5773	161
842	RM11522	TAACTGCAGTGCTCAACAAAGG	CTAGGTACCGGATTAAGATTCACC	1	29.8276	375	1	31.3266	334	1	25.6108	351
843	RM11528	CTGGAATACCAAGCTCAAGAAGAAGG	ATCACTCGAGCACTCTCGTTGG	1	30.0065	682	1	31.5255	682	1	25.7929	682
844	RM11529	ATGGATCGCGACATCCACTAGC	GGCAAAGTTGACAACACGTACCC	1	30.0152	99	1	31.5341	95	1	25.8016	85
845	RM11530	GTGTGTTTGAACTGGACATTCG	GTTTGAAAGAGCCGAAGATACG	1	30.031	491	1	31.5497	450	1	25.8175	474
846	RM11531	TCTCATCCCATCCTCTTCCTCACC	CGGTGGCAGAACCAACAAGAGG	1	30.0575	124	1	31.5776	113	1	25.844	135
847	RM11532	GCAGCTCAAATAGCAAGAGTCTATGG	GCATATGTCCCACAGCTATTACGG	1	30.0712	348	1	31.59	352	1	25.8581	302
848	AUT11533	GCGAAGCCCAATCTGAAGAAGC	CCAGTCCCAGAATGTCGTTTCG	1	30.0963	166	1	31.621	162	1	25.8827	164
849	RM11535	AGTACGAGCTCCTCCCGCTTCG	TCCACCTCCTCCTCCTTCCTCTCC	1	30.1259	333	1	31.6505	324	1	25.9121	333
850	RM11537	ACAGCATGGGTAGCAGTGTGC	CAAATGGCGAGGATTGAGAGC	1	30.1339	178	1	31.6585	135	1	25.9199	149
851	RM11538	ACAGCATGGGTAGCAGTGTGC	CAAATGGCGAGGATTGAGAGC	1	30.1339	178	1	31.6585	135	1	25.9199	149
852	RM11539	GCACACTTTGATAGCCCTGATCC	CCAACTCTACGCATGCTCTCTTAGG	1	30.1546	264	1	31.6846	285	1	25.94	302
853	RM11540	GAAGCTCATGGGCCACATCAAGG	GCGCTTCCGCTCTCTAAGGTTCC	1	30.1883	195	1	31.7192	199	1	25.9753	201
854	RM11542	CTCTGCGAATACGTGAGCTTTCC	CCTACCAACGAACCCTAGCAACC	1	30.3121	138	1	31.8552	137	1	26.0954	135
855	RM11543	GCTCGATGTACTCGTAGCTCAGG	CAGCATCATACTCACACAGTTCG	1	30.3234	157	1	31.8772	157	1	26.1065	157
856	RM11544	CTCTCGCTCTCTGTCTCACTCTTCC	CAGTTGCCTCAAGATGCCTTGC	1	30.3576	334	1	31.9113	293	1	26.1413	326
857	AUT11545	AACGCAGTGCAAGTTGTATAGTGC	TCAGTACGTCCGGTCTGAAAGC	1	30.369	178	1	31.9228	158	1	26.1531	160
858	AUT11546	TGTTCCTGTGCTTGTGTCCTTTGC	GGCTCAACAGCCACACAGATGC	1	30.3712	96	1	31.9249	132	1	26.1552	94
859	AUT11550	GACAAGACAAACTGAGCAAACTCG	GGTGAACGTCCTGTCTGTAGTGC	1	30.447	198	1	32.009	182	1	26.23	200
860	AUT11551	GACAAGACAAACTGAGCAAACTCG	GGTGAACGTCCTGTCTGTAGTGC	1	30.447	198	1	32.009	182	1	26.23	200
861	RM11553	TCCGTCATAACTGACGCTGATCC	GAGGAGGAGCAGGAACGAGAGC	1	30.5022	538	1	32.0592	538	1	26.2713	528
862	RM11554	AGGACTTAGGGTACGTTTGAATCTCC	GACGATGATTGTCTCCTAAGTCTGC	1	30.5164	318	1	32.0735	283	1	26.2859	270
863	AUT11555	GGAAGGAAGGCCTATGTGTCTCC	GCTCATTTGCTCCCTCCTTTCC	1	30.6598	190	1	32.2024	168	1	26.4099	180
864	RM11556	GTCCGTACCAAACATTTGACTTGC	ACATGAACCGAACTACCGAACG	1	30.6751	167	1	32.2184	167	1	26.4248	167
865	RGNMS297	TGATTAAAGTTGTGAAGGTGAA	TATAAATCAACGCATCCAAATA	1	30.7125	270	1	32.2592	268	1	26.4625	270
866	RM11558	GCGCTGTTTGTGCTTGTCTACG	CGGCACACGAATTACTAAGAAGTGC	1	30.7127	92	1	32.2593	90	1	26.4626	92
867	AUT11559	AACGTAGACGGATGAGCAGAAGC	AATGCACGTCAGTATGCGTTCG	1	30.72	265	1	32.2668	292	1	26.47	252
868	RM11562	TGCACTGACCTAGTTCGATATTGC	CATTCGAGAGATGCAACAACACC	1	30.9103	182	1	32.424	186	1	26.6421	183
869	RGNMS298	GACCTAGTTCGATATTGCTGAT	GGTATATGTTCTCGTTTGGTTT	1	30.9103	239	1	32.424	243	1	26.6421	240
870	RM11566	TTACGTTGTGAAGAGACCTAGC	TACATCACTGAGAGTTGGTTGG	1	31.0045	403	1	32.5101	444	1	26.7922	399
871	RM11569	CGCGAAATCTAGCGAAACAAAGG	GAACAGGCCGAGGAGGAAGAGG	1	31.0382	162	1	32.5362	162	1	26.8232	162
872	AUT11570	TGGGCCTCTTTGTTTCATACTCC	TCCTCATCTCTCTCCGTGTCTCC	1	31.0404	391	1	32.5385	334	1	26.8254	355
873	RM8126	TGGGCCTCTTTGTTTCATACTCC	TCCTCATCTCTCTCCGTGTCTCC	1	31.0404	391	1	32.5385	334	1	26.8254	355
874	RGP126	CTCCCCTCTCTTCTCATCTCTCTCCT	TTGGTAATATGGGCGGCTGTTTTA	1	31.0408	229	1	32.5387	172	1	26.8257	175
875	AUT11571	ACGGGAAAGATAAAGGTGATCC	TGCAGCACACATTACAGTCACC	1	31.0507	96	1	32.5541	88	1	26.8359	100
876	RM11573	CCAGGCAGACAGACTGTGAAACC	GCCATGATCGAATCGAGAAACG	1	31.0826	164	1	32.5862	154	1	26.8678	170
877	RM11579	ACCTATGACTCCTCGACCATACC	ACAGAGTGGAATGGATGAAACC	1	31.1513	526	1	32.6298	647	1	26.9126	518
878	RM11581	CAAGAAACCGCGAGCCATTCC	CGATGGCGGTCTTGGAGAAGG	1	31.2146	348	1	32.6858	349	1	26.9685	313
879	AUT11582	GAGACCTGCCTCCCTCTACACG	GAGAGATGTACGGACGAATGAAGG	1	31.2349	180	1	32.7078	176	1	26.9888	176
880	AUT11583	CCAGCCCATTTCAGTCCATTTCC	GACGGACTGCAGGTTGGACACG	1	31.235	255	1	32.7079	251	1	26.9888	243
881	RM11584	CTAGTCTCTAGCCCATCCCTACC	TCAGGTCAATCAGTTCACTTCC	1	31.2423	254	1	32.7153	254	1	26.9962	258
882	RM11585	CTAGTCTCTAGCCCATCCCTACC	TCAGGTCAATCAGTTCACTTCC	1	31.2423	254	1	32.7153	254	1	26.9962	258
883	AUT11587	CTAATCTGACTGGAAACCCAGATCG	GAGCGGAGGAGCTATAGGATCG	1	31.2926	169	1	32.7629	163	1	27.0405	163
884	RM11589	CGTTCGGATTGTAAACTCCTTCC	CAACGATGGCCCAGTAAATATCC	1	31.3043	584	1	32.7748	583	1	27.0523	603
885	RM11593	TGTGGAGGAGATGAGAGGAGAGG	AACCTAGCGGGTGAGATTTATCG	1	31.3623	172	1	32.8451	170	1	27.1166	194
886	RM11594	CCATGGACTATCGGGAGTTAGG	CTGATTTGATCCGTTTCTCACG	1	31.3788	311	1	32.8607	356	1	27.1378	356
887	RM11597	GTATTTATTGTGGGCGGCAAACC	CGTTTGCTAGTTCAGTGTTGTGTCG	1	31.3911	403	1	32.869	261	1	27.1463	347
888	RM11598	AAACTCGAAACGGGAAGAGTCG	AGGGAGGAAGAGGAGGAATTGG	1	31.3936	394	1	32.8714	399	1	27.1488	396
889	RM11599	CGAAACGGGAAGAGTCGAGACG	TCGAGGTGGAGGGAGGAAGAGG	1	31.3936	398	1	32.8714	403	1	27.1488	400
890	RM11600	CGCCTGGAGAGAAGAGGAGAGG	GAGTCGAGTCTGGTTGGCTTCC	1	31.4312	66	1	32.9089	66	1	27.1861	63
891	RM11601	GGTGGGAAGCCAACCAGACTCG	GGGTTTACCTGCGCTAACCCAAGC	1	31.4312	388	1	32.9089	386	1	27.1861	403
892	RGNMS268b	TGTAAGGAATTTAACCAAACAAC	TATAAGCAACCACGAACTATACAT	1	31.4893	398	1	32.9426	398	1	27.2388	397
893	AUT11605	TCAACAAGGCACCAAACACTACG	GAGTCTTAGAGGCCGGATTTGG	1	31.5625	176	1	33.0402	182	1	27.3118	582
894	AUT11606	AATGGGAGGGCAAGATGAACG	GTCGCAAGTGATGGTGACTCG	1	31.5635	291	1	33.0413	283	1	27.3132	283
895	AUT11607	AAGGAAGCAGAAGCAGGTGAGC	GACCTGATGTTGAGCCATTTCC	1	31.5863	186	1	33.0627	198	1	27.3381	180
896	RM11609	GGTTGGTGAGAGCGACAGGTACG	CTTAGCTCGGTTCGTCGGTTGC	1	31.6749	381	1	33.1466	385	1	27.4229	381
897	AUT11614	GACCTCGACTCCTACTCCGACTCC	CCTCGTCCTCAAGTGCCTCTCC	1	31.7514	162	1	33.2227	162	1	27.5009	153
898	AUT11615	TGCTCTTATACCGTTCACATCC	TCAAACTAACCCTTCTGAGAGC	1	31.8496	288	1	33.3225	285	1	27.5955	274
899	RM11617	GCCCACACTATAGAGCAACTGAGC	TGTTCACGGATGAAGAGAAGAGG	1	31.9198	212	1	33.3912	212	1	27.6617	212
900	RM11618	CTGTTCCTGGGAGCTGGAGAGG	CACTTAAGAAGGAGGTGGCGAAGG	1	31.9248	187	1	33.3962	185	1	27.6663	191
901	RM11619	CTGTTCCTGGGAGCTGGAGAGG	CACTTAAGAAGGAGGTGGCGAAGG	1	31.9248	187	1	33.3962	185	1	27.6663	191
902	RGNMS118a	CATATGTGCACTTAGCTTACACTT	ACAAATGACATTATTTCGAGACTT	1	31.9294	215	1	33.4008	215	1	27.671	215
903	RGNMS139	TTGTAAACTGCATGAAGACTCTAT	CCACATGTCATTTCTTTATTCTAA	1	31.9319	374	1	33.4037	375	1	27.6735	374
904	RGNMS1329	AAATTATATTGAACCATGACTGTG	GCAGAAGAGTACTTAGGAGCTTT	1	31.9339	282	1	33.4055	260	1	27.6754	258
905	RGNMS259	AAATTATATTGAACCATGACTGTG	GCAGAAGAGTACTTAGGAGCTTT	1	31.9339	282	1	33.4055	260	1	27.6754	258
906	AUT11621	CAACACCTGAATCGTGTGACAGC	GATGTACAGCACCGACCACACC	1	31.9345	183	1	33.4062	163	1	27.676	179
907	RM11623	GGAGTGGAGTGCTTTGCTCTGC	CGACACGACGAAGCAGGAAGG	1	32.014	459	1	33.4828	447	1	27.7663	432
908	RM11624	ACGTACACCCTGCAGTCCTTGC	CTACGCCGGCTACGTCAAGTCC	1	32.0197	286	1	33.4885	280	1	27.772	280
909	AUT11625	GCAAAGATGGCGCAATTTATAGGC	GCACGTGATGAGCTCCGTTTCC	1	32.0203	137	1	33.489	140	1	27.7726	137
910	RGNMS1343	ATGACCGGCTTCATCGAGAGCTA	TTAACCACAACTTGCATTATATTT	1	32.0971	266	1	33.5714	266	1	27.8466	266
911	RGNMS269	ATGACCGGCTTCATCGAGAGCTA	TTAACCACAACTTGCATTATATTT	1	32.0971	266	1	33.5714	266	1	27.8466	266
912	RGNMS1352b	GTGGTGTCTGGCCTAGAGATGG	GATCTGAAGAAGGAATAAGTTCAT	1	32.1081	348	1	33.591	355	1	27.8599	350
913	RGNMS1380	AGTACATTATTGCATTAGCCACTA	AAGATCCTTATCAGTCTAACCATC	1	32.1117	299	1	33.5965	299	1	27.8635	299
914	RGNMS311	AGTACATTATTGCATTAGCCACTA	AAGATCCTTATCAGTCTAACCATC	1	32.1117	299	1	33.5965	299	1	27.8635	299
915	RM11628	AGTCTTTCATCTGACCGAGCAAGC	GAAGATCCCGGAGGCGTTAGG	1	32.2312	269	1	33.704	269	1	27.9653	272
916	RM11629	ACATTGGAAGAGGGAGTCAAACG	CCCAAATTCTGAGCATTGTCTGC	1	32.2358	299	1	33.7098	265	1	27.9699	287
917	RM11632	GTTCCAAGACGATGATTCTACTCC	CGTACTAGCTTTGTTCCCATGC	1	32.28	199	1	33.7528	195	1	28.0137	195
918	RGNMS434	AACAAGATATTGTCATTGAAGATG	GTTAAACACAGTCAACAAGCTTAC	1	32.2825	246	1	33.7552	246	1	28.0161	246
919	RM11633	CCTCCTGGACGAATGAGATAGACC	AGCCTGTGCTTCAGCTTCTTGC	1	32.2987	167	1	33.7714	163	1	28.0323	167
920	RM11634	CGCACGAACAAGACAGAGTCACG	GTGAGCCGCCTCTCCATCTTCC	1	32.2987	396	1	33.7715	393	1	28.0324	396
921	RM11635	TTGTCACCCTTACTAGGATCAGC	GTGTGACTCTTGATGTAACTCAGC	1	32.3071	293	1	33.7799	288	1	28.0408	301
922	RM11642	AGCTCAATCTTTGCCTCGTCAGG	AACACCGCCTATGCATGTACTCC	1	32.3457	181	1	33.8121	181	1	28.0755	181
923	RM11646	GAACACTTGTTTGTGGCGAGAATGG	CAAGCGTATGCTCCCACACTCC	1	32.4715	436	1	23.1402	346	1	28.182	392
924	AUT11648	TGATTTCTTGGAAGCGAAGAGTGAGG	CCTCCTTGTGCTCAGCCATGC	1	32.4946	94	1	33.9376	87	1	28.2048	90
925	RM128	TGATTTCTTGGAAGCGAAGAGTGAGG	CCTCCTTGTGCTCAGCCATGC	1	32.4946	94	1	33.9376	87	1	28.2048	90
926	AUT11654	CCCATTCAGTTGATCCTGTCTGC	AGCTGGGATGCAGAAGAGTATGG	1	32.6808	158	1	34.1116	172	1	28.3801	170
927	RM11655	CTGCATACTGTTCAGTGATGTTCACC	GCAGAGAGATGGCAAGAGAAACC	1	32.7141	90	1	34.1582	104	1	28.4133	114
928	AUT11656	AGCCATTTCCAGCAGTTCATGC	CCAGTTTCAAGGCTCGGAAGC	1	32.736	181	1	34.1802	169	1	28.4355	177
929	RM11657	TATTCCACTGATATGCCGGATGG	AAATCATCCGCGCTCTTCTTGC	1	32.7883	371	1	34.2242	344	1	28.4782	355
930	RM11659	CTTCTTCTCTCCGCCGCCTTCC	GTGTTTGGCGGAGGAATCTGAGG	1	32.8715	288	1	34.3249	288	1	28.5644	288
931	RM11662	TTCTGGCTATTGGTTAGCTTCTCC	CTTTGCTTCCGTCCATGTTTACC	1	33.0092	97	1	34.433	96	1	28.6777	96
932	AUT11664	TTATGGACTTGTGGGTGTCATGG	AAAGGCGATGAGTCAACATCTGC	1	33.1201	255	1	34.5474	295	1	28.794	245
933	AUT11667	GCTGTCACTGACCGAGCGTAGG	TCGAGAGATCCAATCCAGTTTGC	1	33.1667	189	1	34.5974	179	1	28.843	199
934	RM8097	GCTGTCACTGACCGAGCGTAGG	TCGAGAGATCCAATCCAGTTTGC	1	33.1667	189	1	34.5974	179	1	28.843	199
935	RM11668	AGTGTCTCTGGAGTTGGGAGTGG	CTGTTCTTCCAGATGGGCTTCC	1	33.1795	168	1	34.6122	156	1	28.8555	160
936	RM11669	AAACCGTTCCAGGGAGACTGACC	TCGTCTGATCCATCCATCCATCC	1	33.2093	168	1	34.6416	156	1	28.8725	168
937	RM11670	AGAGGAGGCATGGTGAGTTTGC	AGCAGAGGAAGAAGCTGCAGAGC	1	33.2483	183	1	34.6702	183	1	28.8986	189
938	RM11672	CAGTTCGGATTCGCTGAAATACC	TTCGCCCAAATACCACTATACAGC	1	33.2626	557	1	34.6842	543	1	28.9138	761
939	AUT11673	TGTGATAAGGGATGCACTTGAGC	CAAGATCTCCACATTTGACTCACG	1	33.2662	209	1	34.6874	197	1	28.9172	266
940	RM11675	CTCGCTGGACATGGTCCTCTTCG	GGAAGTTGAGCAGCGCCTTGG	1	33.3239	376	1	34.7436	376	1	28.9717	376
941	RM11676	TCTCCTTCTCCGGTCGGTTTCC	CCAAGGAGAGGGAGTCCAGAGC	1	33.355	386	1	34.7747	383	1	29.0028	386
942	RM11677	GTCTTGGAGCTGAGCACCTTGG	GGCCCTCCGTGTAATCCTATTCC	1	33.3961	180	1	34.8437	174	1	29.0417	174
943	RM11679	GACGAGCTAGCGAAACGGAGAGG	AGCAGCTGAGCCAAGCTGAGACG	1	33.4064	94	1	34.8534	94	1	29.0517	94
944	AUT11682	TTGGAACGAGAGCTTAGCTAGATGG	CATGCCTCCTTGAATCCAGAGC	1	33.4637	361	1	34.9265	355	1	29.1089	358
945	AUT11683	TTACAGTCAAGGTCTCGCTCTCG	TCGGAAGACCACTCACTCTCTCC	1	33.4688	189	1	34.9316	189	1	29.1139	189
946	AUT11684	GGAGCTTGAGTTAAGACTGGTTGG	CTTCCCTCTCGTTCAAATCAATCC	1	33.4757	152	1	34.9385	152	1	29.1208	158
947	RM11685	GTCTCTCGGGTCGCAGATCACG	CCATACGGGCCACACACGTACC	1	33.5013	90	1	34.9641	90	1	29.147	90
948	RM11686	TCCAGCACCATCATATGTATCTAGGG	GATGCAAGTGGGACGGATAAGC	1	33.5132	230	1	34.9786	242	1	29.1579	226
949	RM11689	GCCGCTCTGATGAAATGGAAAGC	GCTCGCATGGTTGGGACTTGG	1	33.6053	176	1	35.0956	176	1	29.2528	176
950	RM11691	GAAGTAGCAGAACTTGGTGTCACG	CTGCTTGCCTACCTTCCTCTCC	1	33.607	441	1	35.0973	438	1	29.2545	438
951	RM11694	GCGTCTATGCGTATCTTCATCTTACC	CAACTCTGCTAGTGTGCCTCTGC	1	33.6538	193	1	35.155	171	1	29.3017	157
952	AUT11698	ATCAGCATCCCAAAGCTAGAACC	AACCGTATATTGAGGGAGCAAGC	1	33.7043	122	1	35.2351	108	1	29.3627	112
953	RM11699	CGTGTCTGATCACAATCATCTGC	CATGGTCTGAAGGAACCTCTGC	1	33.7329	75	1	35.2587	73	1	29.4038	77
954	AUT11700	GCTCCTCTTATTCCCTCCTCTCTCG	GAACACCTCCCGATCGTGAACC	1	33.7821	219	1	35.3094	221	1	29.4533	219
955	RM11701	CTGGTGGAGTTGCAGTGCCTCTAGC	CCTTGCTGCTTTCTCATTGAAACTGG	1	33.7835	233	1	35.3108	225	1	29.4547	229
956	AUT11704	ACAGGGCTATGCAGACACAGTGC	AGCAAGCGAAGGGAAGTGACC	1	33.8565	240	1	35.4074	172	1	29.5206	188
957	AUT11705	ACATCGCATGCAGACTGATTAGC	CCAATGGAACAGTGACACAAGC	1	33.8641	177	1	35.415	173	1	29.5282	173
958	RM11706	CTTTGACCAGGACAATCTAGC	CTATTATACCGTGAGGTGTGTACC	1	33.8936	214	1	35.4445	220	1	29.558	211
959	RM11709	CAGCCCGGCAGTCTATATTTCG	ACTGACGACGGGCTAGTGTTCC	1	33.9762	225	1	35.5342	193	1	29.6313	239
960	RGNMS341	ACTATGTGAGATGGAGTGTGTG	GTGTTAAACAAAGCACAGCTAA	1	34.015	180	1	35.573	172	1	29.6704	180
961	RM11712	CTGAGAATGTCCCATCAGAAAGC	GATCTGCATTCTATGCTGCAACG	1	34.0532	792	1	35.6169	664	1	29.7065	723
962	RM11714	GGACCGCTACAGTATTTCGCTACC	TCATCAGAGTGGGAAGAAGAGAGG	1	34.0547	229	1	35.6183	226	1	29.7079	226
963	RM11718	CGTACCTCTCGAACGGGTCTAGC	CACCACCTCCACGCTACTACTCC	1	34.1241	154	1	35.6899	184	1	29.7743	151
964	RM11720	GAGCGTGGACAAGCTTGAGAGC	GTTGGCTGCCTTAGGATGTAAACC	1	34.1287	335	1	35.6945	350	1	29.7788	356
965	RM11722	CAGGACATGAAGTTCTCATGAACG	CTAACTAGCCGCCTCTTGTCAGC	1	34.2006	154	1	35.7513	160	1	29.8544	152
966	RM11723	GCTAGTAGCTAGCTGCCCTCTTCG	TGGTCCATTCTCGTATCCTGACC	1	34.2034	87	1	35.7541	87	1	29.8572	87
967	RM11724	CCTCGACCTGGAGAGGTTTGG	TGGCTTCATGAGGATGCTAGTGG	1	34.2072	93	1	35.7582	93	1	29.8611	93
968	AUT11726	CCAATCCTTTCCAAATCCAACG	GCCAAATATCTAGCCTCCTATTGAGC	1	34.305	158	1	35.8528	155	1	29.9497	158
969	RM11727	GCGATTATTGCTGCATGAAACC	CATTAGAACCTGGAGCATGAGTTAGC	1	34.3659	285	1	35.9047	283	1	30.0087	285
970	RM11728	CTCCTCATGTTCCCACGACTACG	TCCGAAGACAAGGAAGAAGGTAGC	1	34.4056	249	1	35.9444	243	1	30.0484	246
971	RM11729	CGAATAACCTACCAAAGTACCG	TAATTGCTGCAGCTAGGATAGG	1	34.4412	439	1	35.9798	482	1	30.0839	401
972	RM11730	ACGATGTCTTGGCATCCCTTCC	CGCTAAGTTCCATGCTCAGTTGC	1	34.481	85	1	36.0193	77	1	30.1236	85
973	RM11733	AGTCACACTATAGAGGGCTTGATTGG	CACCCGTATCAAGTTGCAAATCC	1	34.5505	145	1	36.0792	123	1	30.1902	543
974	RM11734	CAGGAGACCACCATTTAGTTTGTAGG	GGCAGGTTGAAGGCAATAGACC	1	34.6119	164	1	36.1661	160	1	30.2488	164
975	RM11736	CCATAGGACACATTTACACAGAGG	GCTTCTGCAGTCTATTGTTGACC	1	34.6781	283	1	36.2254	279	1	30.3087	281
976	RM11738	AGGCTCATGCGAGATTATCTGACC	AAATGGTCTTCAGTGCTCCAGTTCG	1	34.6843	296	1	36.2313	198	1	30.315	250
977	RM11740	ATCTCGACTCGCACACAACTCC	ACTTCGGTTAATCACTGTGAGTGAGG	1	34.74	395	1	36.3279	457	1	30.3712	395
978	RM302	tcatgtcatctaccatcacac	atggagaagatggaatacttgc	1	34.7442	123	1	36.4	119	1	30.3755	119
979	RM302	TGCAGGTAGAAACTTGAAGC	AGTGGATGTTAGGTGTAACAGG	1	34.7442	123	1	36.4	119	1	30.3755	119
980	AUT11742	AAGGAACGCGAGAGAAGAGAACC	ATTCTGAGCAGGAGAAGGGAAGG	1	34.8065	296	1	36.4501	292	1	30.4239	300
981	AUT11743	AAGGTCAAGGAAACAGGGACTGG	AGCCACGAATTCCACTTTCAGC	1	34.8104	161	1	36.454	159	1	30.4278	159
982	RM11744	CCACCCGTATAGGACCAGTCG	TAGAGTCTCCAGGCAGTCTCACC	1	34.919	148	1	36.5417	145	1	30.4981	148
983	RM11747	CCATGGCATGCTATATTGGAAGG	GGTTGGAGAATAGAGAGGAGGTAACG	1	35.0006	187	1	36.6396	185	1	30.5782	211
984	RM11748	TGTCAGCAATGATACTGTGAGTCC	TTTCACATGCCTACTGGACAGC	1	35.0037	179	1	36.6426	174	1	30.5812	181
985	RM11750	ACCGTGCTTTAGTTATCCACCATCC	TTTGTGGCTAGTGCGAGTTGG	1	35.0425	91	1	36.6846	84	1	30.6223	91
986	RM11762	AAGCGACAACTGAAGGAAACTCG	TTTGAAAGTCCACTGCCAAGTGC	1	35.4146	160	1	37.0622	186	1	30.9251	162
987	RM11767	ATAGCTGTTTGAACGCCATGC	GGCCCATAATCAATCACAAGAGC	1	35.6334	442	1	37.2774	437	1	31.172	467
988	RM11768	ATAGCTGTTTGAACGCCATGC	GGCCCATAATCAATCACAAGAGC	1	35.6334	442	1	37.2774	437	1	31.172	467
989	OSR3	agctaaggtctgggagaaacc	aagtaggatggggcacaagctc	1	35.7898	273	1	37.454	254	1	31.3132	225
990	RM11782	GGAGTGTTTGTAGGACTGACACG	ACATTACCCGAATCAGGATAGG	1	35.9295	179	1	37.5588	183	1	31.44	179
991	RM11784	CTACGGCCCATAGCAATCAACG	TTCCGTCGACGTCTTAATCATGG	1	35.9457	90	1	37.5751	94	1	31.4565	90
992	RM11790	GCAAAGCACCCAAACCAAACC	GAAGAGGAGGAACACGAGGAAGG	1	36.1348	227	1	37.7835	224	1	31.6132	227
993	RM11794	AGGGAGAGAGGAGGAGGGAGTAGG	GCTAAACACACCAGCGTCTTGG	1	36.2455	179	1	37.9106	182	1	31.7217	185
994	RM11795	GATCTGCGCGTTAGTGTGATTCG	GAGGCGAGAAACGCACAGTGG	1	36.2624	187	1	37.9287	187	1	31.7386	187
995	AUT11796	ACTTGTCTGTGTCACTAACCATGC	GATACATGGCGTCTCAACTACACC	1	36.2651	178	1	37.9314	172	1	31.7413	175
996	AUT11797	GCTTTCCTCTCCTCTCCTCTCC	CAAATCAGTGTCGTATGCAGTGG	1	36.2709	199	1	37.9372	178	1	31.7471	202
997	AUT11798	GTTGGCGTACGTAGAGAGGAGTACG	CTTCATTGTCGCTGCCAGAGC	1	36.3048	154	1	37.9705	146	1	31.7805	136
998	RM11799	CCGTAGTATGTTACGGACATGAGG	TGTTATGGCAGAGTGGTAGATGC	1	36.3172	196	1	37.9828	198	1	31.7933	220
999	RM11800	GTCTGTTGTCTTTGTTGCCAAGG	CTTCCTGTGCTTACTCTTCTTCTTGC	1	36.3306	224	1	37.9963	227	1	31.8089	224
1000	RM11801	GACGACGTCGAGAGCCTCTTCC	AGCTGGCTAGCTGCAGTTTCACC	1	36.3333	283	1	37.999	274	1	31.8115	286
1001	AUT11802	ATGCACCACCAGCAGCTCAAACC	CGGATGAGGGAGTTGTAGCAGAAGG	1	36.3922	298	1	38.1032	289	1	31.8665	295
1002	AUT11805	ATGACACACCACCACCACCAACG	GGAAGCGCAGCATCAACAAAGG	1	36.4502	71	1	38.1649	65	1	31.9252	71
1003	RM11807	CTACGTTTGGATCGGAGGAGAGG	CCCTTCTATTTCGCTTCCATTTCC	1	36.4783	114	1	38.1931	113	1	31.9536	115
1004	RM11808	TCTGCAGCTTCTTGAGTTCTTCC	ATCAGTGCAGGCTTTAGGTTTGC	1	36.526	263	1	38.2341	251	1	31.9907	281
1005	RGNMS376	GAATATCTGTTTCGCCAGATT	ATTGGGAAAGTTGTGTTCTTT	1	36.6189	154	1	38.3198	136	1	32.0732	150
1006	RM11812	CAAATCACCCACTGTAAAGACC	CCGGTGTAAATTAGCTGTATGG	1	36.6244	109	1	38.3253	109	1	32.0782	117
1007	RM11814	TCCAGACTTACCGCCTATTCTAATCC	AGAGGAGGGAAGAAGAGGAATGC	1	36.644	246	1	38.3448	248	1	32.0978	246
1008	AUT11815	GCGCCCAATGCATGTAAATTCC	TGCCGATACCTGTGATCAAGTCC	1	36.6578	288	1	38.3587	263	1	32.1117	272
1009	RM11817	CGACAAGTGCTCGGAGATACTGC	AGCTCAGTGTTGCTCTCCGTACC	1	36.7015	354	1	38.3986	345	1	32.1454	354
1010	AUT11818	GCTTGCATTATGCGATTGTACTCC	TGAGCTTTCTCAACAACGACTGC	1	36.7125	130	1	38.4096	136	1	32.1564	173
	RM315	GAGGTACTTCCTCCGTTTCAC	AGTCAGCTCACTGTGCAGTG	1	36.7352	137	1	38.4237	129	1	32.1723	559
1011	AUT11819	CTGCCTCCTCCATTTCCCACTCC	CGAACGACTGCTCCCTCTTCAGC	1	36.7525	165	1	38.4497	173	1	32.1993	553
1012	RM11820	CACCGAGACAGTGAGACGTACAGC	TATCGGTAGGCCGTTGGATTCG	1	36.7886	268	1	38.4759	268	1	32.2229	268
1013	RM11821	TTCCGTCGTACGAGTTGCTGTCC	GCTGCACGTCGTCGTCTACACC	1	36.789	484	1	38.4763	478	1	32.2233	484
1014	RM11824	GTACTGCAAATCTAGATGGACTGG	TAGCTATTCATCTGCCACAAGC	1	36.9967	116	1	38.6805	112	1	32.4248	108
1015	RM11825	GAGTCCTGCAAGAAGCCAAGC	CATCTCCGATGATCTCTCCAAGC	1	37.0038	90	1	38.6889	90	1	32.432	81
1016	RM11828	TTCTGCAGATGCACAATGAAGC	GACAATGTTGAGGCTCCTAAAGAGG	1	37.0714	190	1	38.7333	187	1	32.4718	187
1017	RM11839	ACTCTTGTCTCTGTGGCTCTCTGG	CACCTTGGGCAGAGTGAAGAGG	1	37.3487	164	1	39.0059	161	1	32.7214	161
1018	RM11840	GTGGGAGTACTGATCAAATCG	GACAATCAGTACACTGTTCTCAGG	1	37.3934	629	1	39.051	694	1	32.7693	638
1019	RM11841	AACTTGCACACCGCACAACTCC	TGCTGTATGGCCATGTGGATGC	1	37.4008	366	1	39.0585	802	1	32.7767	294
1020	RM11843	ACGCAGAATTGATTCGCTCTCG	AGAGGAAGAGGAGGGAACGAACG	1	37.4693	212	1	39.1153	223	1	32.8334	203
1021	AUT11844	TGTGCTATTGCGCGAGATTATCC	CATCACCGCTCCAACTCATGC	1	37.4892	243	1	39.1703	237	1	32.8535	247
1022	RM11847	TCTTCATTGCATTGCTGCTACG	AACCAACCGTACTGTTTCTTCTCC	1	37.5259	278	1	39.2042	282	1	32.8893	282
1023	AUT11849	CCGAGTTGTATTACTGGTGCAAGG	CTTTGCTCCAAACCTCAGTCTCC	1	37.5943	224	1	39.2712	238	1	32.9583	238
1024	RM11851	AGTAGGCAAGCCTCAATCGATCC	GACGTACCAATCTGATGTACGAAGC	1	37.6681	150	1	39.3488	150	1	33.0345	150
1025	RM11859	GTGGCGGTTTCGCTGTGTTAGG	CCATCTAACGGCACAAGCACATCC	1	37.879	70	1	39.5448	73	1	33.2379	70
	RM472	CCATGGCCTGAGAGAGAGAG	AGCTAAATGGCCATACGGTG	1	37.8901	276	1	39.5514	287	1	33.2506	277
1026	RM11860	GTGATAGCAGATGAGCAGCATGG	AGTAACAGCTGCCACAACTTTGC	1	37.9104	131	1	39.577	149	1	33.27	146
1027	RM11861	GTCACCATGCTCTTGGTGTTGC	CAGGGCATCACTAGGCACTACG	1	37.9244	179	1	39.5908	171	1	33.284	171
1028	RM11865	CAACTCATTCGGCTTCTCTTTCC	GCAATTGCATGAGTTGGAATGG	1	38.0218	394	1	39.7345	235	1	33.3798	295
1029	RM11866	AGGCTGACGTTGTGGTGGAACC	ACCCAAATCCAAGCATCCATCC	1	38.0252	263	1	39.7378	260	1	33.3831	263
1030	RM11867	AGGCTGACGTTGTGGTGGAACC	ACCCAAATCCAAGCATCCATCC	1	38.0252	263	1	39.7378	260	1	33.3831	263
1031	RM11869	CAAATCTCGCAACAACACAGAGC	CATACCAGCCCAACCGAAACC	1	38.0543	172	1	39.767	212	1	33.4125	174
1032	RM11870	AGGTGATGCTAAGCCAGCACAGG	ACCTCCATCCGGATATTCACTGC	1	38.0545	421	1	39.7672	403	1	33.4128	676
1033	AUT11871	TTTCCGACTGAACAAGTACACAGC	GAGTGAGCAAGAACTGTCATCACC	1	38.1388	163	1	39.8531	165	1	33.4853	559
1034	RM11872	CATCCCAATCTGGCCTTGACTAAGC	TTCTCGGGAGGTGGAGGACAGG	1	38.1457	95	1	39.8601	101	1	33.4926	95
1035	RM11873	GCTGGTCCGTGCATGTTAGGG	CCATACTTTCGCTGCTTGATTCG	1	38.1842	179	1	39.9337	233	1	33.5311	194
1036	AUT11874	CCACTAGCAGATGATCACAGACG	GAGCACCTCATAAGGGTTTCAGC	1	38.2271	192	1	39.9923	170	1	33.5735	178
1037	RM11875	GCGAAGACAGACAAAGGCAAGG	TCTGCCTTGTGATCGTCGAACC	1	38.256	191	1	40.0266	183	1	33.6025	183
1038	RM11876	GGGTGGAAGGAGGACAACTGC	CATCTGCTTGTTGGTTTGATAGCC	1	38.2643	152	1	40.038	124	1	33.6108	126
1039	RM11881	TCAAACGCAGTAACACTTGACG	CTTTCCTGTCTGTGAGAACAAGTAGG	1	38.3611	352	1	40.0782	352	1	33.688	352
1040	RM11885	ACACCCTTCATTTGCGTGTATGG	GGCACCTTCGACTTTGTAAATGC	1	38.4435	179	1	40.2212	221	1	33.766	191
1041	RM11893	AATTCGGTCACTCGCTGTCACG	CTGCGGACGAAATTGCTTAGCC	1	38.526	162	1	40.2886	160	1	33.838	156
1042	AUT11899	GTGATGGGAGAGCAGGAGAAGG	CGCAAGTGGACCTCTTATTGTGC	1	38.6905	174	1	40.4133	158	1	33.9393	154
1043	RM11900	CAATTTCCCTCCCAAATCTCTCC	GGGACTTACGATTCCGACATTGG	1	38.7087	253	1	40.4349	279	1	33.9583	241
1044	RM11901	TGACGGTTGAGATCTGTAATGC	CACTTCCAGGCCCATTTATATAGC	1	38.7126	198	1	40.4388	194	1	33.9622	194
1045	RM11903	GGGCATTTGTTGTGACTTGTACGG	GTTCGTTGCGTTGCGACTTGC	1	38.7766	612	1	40.5067	608	1	34.0241	627
1046	RM11904	AGCTTCTGAGCCATTGAGACAGG	CATCAACATTTGCAGCAACAGC	1	38.8763	253	1	40.6089	274	1	34.1568	292
1047	RM11905	TTTGCTGCGAGGAATGTTGTGG	CATACCATGCTCCTGCAATTTCG	1	38.8764	239	1	40.609	260	1	34.1568	278
1048	RM11906	GCTCGCTAAACACACTAGACATTTCC	CATAGGCAGATGAAGGCAACTCG	1	38.879	150	1	40.6127	150	1	34.1594	150
1049	RM11907	CTCACCAGGTCTTCAGTTTCACC	GCAAGTGAGTGTGATGCAGTGG	1	38.9147	185	1	40.6426	179	1	34.1931	187
1050	RM11909	CGTATACTGGTCCTGGTCCATGC	CACAGGAGGATATGGAGACACTGC	1	38.9476	109	1	40.684	105	1	34.2268	108
1051	RM11911	ACCAAGTCGAACTCTCCTCAACC	AACAGTCCGCATCGAGAATGG	1	38.9874	146	1	40.7121	146	1	34.2505	146
1052	RM11914	CGGTCGTATATCGGGTTCAGC	CCAATCTCTTGCTCACTCTCTGC	1	39.0327	294	1	40.7464	288	1	34.2816	294
1053	RM11915	GTGCCACGTAAATTGTGAATGC	TGCTAAGCAAAGCAGTGTTCTTCC	1	39.0636	487	1	40.7701	489	1	34.3225	495
1054	RM11917	AGAAGAGGTCAAGACAGGAAAGTAGG	TGCTGGATTGAGACACATTTGC	1	39.0886	225	1	40.7954	220	1	34.3473	197
1055	RM11918	AGAAGAGGTCAAGACAGGAAAGTAGG	TGCTGGATTGAGACACATTTGC	1	39.0886	225	1	40.7954	220	1	34.3473	197
1056	RM11919	CAAATGGTGAGAGCGAATGTGG	ATGTGTTGCAACGGAGTATGTGG	1	39.0983	426	1	40.8186	418	1	34.3567	407
1057	RM11920	CACTAGAGTTGAGCAGTTCTCTCAGG	AAACTATGGAGTCCCACATCTCTGC	1	39.1019	664	1	40.8222	538	1	34.3603	538
1058	RM11924	ATCTCGGTGCAAACTGTACATGG	CGCGTATTGTCTCTGTTGATTGG	1	39.2423	144	1	41.0423	144	1	34.497	144
1059	AUT11925	GGTGTTAGCATCGGCAGATAGGC	GTAACACGCGTGCGAAATGAGC	1	39.2796	264	1	41.0666	260	1	34.5213	262
1060	AUT11926	GCCTTCCCTTTCCTCTCTTCTCC	CACTCTCACAAACCCGAAGTGC	1	39.2918	185	1	41.0814	185	1	34.5336	185
1061	RM11927	GTGACCACAGCCTCGTCTTCC	GGAGGTCTGGAAGGAGATAACTGG	1	39.3152	188	1	41.1047	188	1	34.5569	188
1062	RM11928	TAAACCAGATCATGCCCTCATCC	AGCAGTAACGGTTGGGTACTTGG	1	39.3398	280	1	41.1327	240	1	34.5815	244
1063	RM11929	GCAAAGCAAAGAGCAGAAGTTGG	GAGATGTCGACGATGGTGTCG	1	39.348	280	1	41.1408	279	1	34.5896	327
1064	RM11930	CGACACCATCGTCGACATCTCC	ATGTGCTTCGACCTGGCAGACC	1	39.3482	176	1	41.1411	176	1	34.5899	176
1065	AUT11931	TCACTTGGTCCTCCACAAAGAGC	CATCTTGTTTCTCTCTCCATGTCTGC	1	39.3596	85	1	41.1523	71	1	34.6	85
1066	RM11932	CTACTCCCTTGAGCAGCTTCACC	TGGAATGTGGATACTCCCTCAGC	1	39.3696	668	1	41.1609	651	1	34.6094	654
1067	RM11935	AGCTGACGCCTGGACTATGAAGC	CACAGCCTAAGTCTCTGTCAACATCC	1	39.5412	162	1	41.3478	142	1	34.7777	156
1068	RM11941	GGGTTTGATTTCTTTGCGCTATGC	AGTGGGAGACTGTTGACAATTTAGGC	1	39.5963	284	1	41.435	464	1	34.8309	412
1069	RM11942	TATCCTCGTAGGAGCCAACTGC	AAGCCACTCCTATTGAAGTTACCC	1	39.6055	188	1	41.4444	192	1	34.8403	190
1070	RM11943	CTTGTTCGAGGACGAAGATAGGG	CCAGTTTACCAGGGTCGAAACC	1	39.6087	76	1	41.4476	68	1	34.8434	74
1071	RM11945	CCGAGCGAGTAGTTCATCTATGC	GCACACAACAACACAAACTGACG	1	39.6142	227	1	41.4531	265	1	34.849	234
1072	RM11946	GTCCACCTCACCGTCATAGTCG	AATCTCGTCCCTTCACTTACGTTCG	1	39.6237	299	1	41.469	296	1	34.8611	299
1073	RGNMS416	TGTGTATCATTTGTCGAATACC	GCTACAAAGGAGAGAATACAACT	1	39.646	358	1	41.4914	350	1	34.8806	340
1074	AUT11949	CATTGACGTGGCACTTTGTTCC	AGAGAGCACGCAATGGAGTATGC	1	39.6461	264	1	41.4916	256	1	34.8808	246
1075	RM11950	GAAACTCAACAAATCGCGAACG	CTAGGCCATTAGCCAAAGCATCC	1	39.6529	388	1	41.4984	373	1	34.8876	357
1076	RM11951	GAAACTCAACAAATCGCGAACG	CTAGGCCATTAGCCAAAGCATCC	1	39.6529	388	1	41.4984	373	1	34.8876	357
1077	RM11953	AGGCGAAGGAGGAGAAGAAGG	GATCAGCTGCTTGAACTCATCG	1	39.7051	163	1	41.5488	154	1	34.9388	151
1078	RM11954	GAAACGGAGTGAGTGCTACTGATAGG	CTGTCGCGTTCCAATTTATTAGCC	1	39.7094	157	1	41.5531	157	1	34.943	157
1079	AUT11956	ACTCACTCACTCACCCACACAGC	TTGGAGAGGGAAGAGAAGACACG	1	39.7655	183	1	41.6105	189	1	34.9998	180
1080	AUT11957	GTCGATGATGGTGGACGTCTCG	ATCACCTCCGGTGTGCTGTACC	1	39.7796	179	1	41.6245	176	1	35.0138	176
1081	AUT11958	ACGGACCGGCTGTCCTACTTCC	GTCACCTCCACCTCGTGAGTCG	1	39.7908	413	1	41.6358	405	1	35.0251	407
1082	AUT11959	GTCATGTCTCTCCCATCAGTTCC	CCATCTTCGTATAGAACTGGACATGC	1	39.8107	310	1	41.6579	310	1	35.0453	328
1083	RM11961	GTCGAATCGCGATAGTCAGAGC	GGTCAGTTTGGCACTTTGAATGG	1	39.9457	187	1	41.8111	179	1	35.1803	187
1084	AUT11962	GAGCAGCGTAAGATCTCCCTACC	CAAGCGAGCACATACATCAAAGC	1	39.9538	165	1	41.8194	144	1	35.1883	135
1085	RM8231	GAGCAGCGTAAGATCTCCCTACC	CAAGCGAGCACATACATCAAAGC	1	39.9538	165	1	41.8194	144	1	35.1883	135
1086	AUT11963	TATCGTGGAAATCCTACCAACC	CCACCACGTGTGTACTCCTACC	1	39.9594	98	1	41.825	86	1	35.194	90
1087	RM8232	TATCGTGGAAATCCTACCAACC	CCACCACGTGTGTACTCCTACC	1	39.9594	98	1	41.825	86	1	35.194	90
1088	AUT11966	CACTTGACGAAGATGAAGGATGG	GAGTGAACTCCTTTGATGGTTTGC	1	39.9776	298	1	41.8469	272	1	35.2119	229
1089	RM11968	CCAAGACATGAGGGAGATAATGG	TGGCTATATTGTGGGACAGAAGG	1	40.0504	440	1	41.9238	485	1	35.2808	456
1090	RM11969	CCAAGACATGAGGGAGATAATGG	TGGCTATATTGTGGGACAGAAGG	1	40.0504	440	1	41.9238	485	1	35.2808	456
1091	RM11977	CGACATGAACAGTGATGGTTATGG	TTTGCTAGAAGCTCCCTAAAGACG	1	40.1268	93	1	41.9886	77	1	35.3123	77
1092	RM11978	GGCCTTTGTTAGAGAAGACATGG	GAATGATTATGCCCTAGGTTGC	1	40.144	297	1	42.0056	298	1	35.33	297
1093	AUT11979	GTTGACAGGGCTAAATGTAGATCG	ACTTTGCATGGACAGGTTATGG	1	40.1949	398	1	42.06	382	1	35.3809	388
1094	RM8235	GTTGACAGGGCTAAATGTAGATCG	ACTTTGCATGGACAGGTTATGG	1	40.1949	398	1	42.06	382	1	35.3809	388
1095	RM11982	CGCGTTCTCCCTTCTTTCTACTCG	GTTACATGGGCCTCCAGCATAGG	1	40.231	194	1	42.0927	210	1	35.4145	194
1096	RM11985	GACTCACCGTGATAGAGCACACG	GGATACAATGGGACAACAATACGG	1	40.2632	294	1	42.1373	281	1	35.4477	312
1097	RGNMS483a	CTCTCCCATTCGCAGTCTACCT	AAACAAACCGAAGGCATCACAT	1	40.2986	313	1	42.1721	313	1	35.4837	313
1098	RGNMS946	CTCTCCCATTCGCAGTCTACCT	AAACAAACCGAAGGCATCACAT	1	40.2986	313	1	42.1721	313	1	35.4837	313
1099	RGNMS277	CTGTTTATCTCTGGTGTTATCTTG	TTAATGTTGCAAACTTACAATACA	1	40.3237	304	1	42.1921	303	1	35.5085	304
1100	RM11986	TCAACCTCGGTGTTCCTCTAAGC	AGCGACACCTCAACTCTGACAGG	1	40.3597	146	1	42.2405	144	1	35.5446	151
1101	RM11988	CTCCGACAGGATCTGGGACTGG	TATGACCTCATCGATCAAGGGAAGG	1	40.3695	410	1	42.2503	396	1	35.5548	742
1102	RM11990	AGATTACACATGCACGGTTACGG	ACACGCACAGTTTCAACGATCC	1	40.3727	78	1	42.2535	78	1	35.5583	78
1103	RM11991	CAGGGTTGAGACGTTGGAATCG	ACGCCTCTCTCCTCTCCCTTCC	1	40.3914	79	1	42.2762	79	1	35.5773	82
1104	RM11992	GAAGAGAATACTACTCCCTCCGTTCC	CCAAGTCTCTGGTGCGTACTATTCC	1	40.3927	185	1	42.2775	211	1	35.5786	153
1105	RGNMS1093	ACTACTACTCCTACTCCGTTCATC	GTGTGAGCTCCTACTACTACTCCT	1	40.3992	332	1	42.2839	333	1	35.585	332
1106	RGNMS465	ACTACTACTCCTACTCCGTTCATC	GTGTGAGCTCCTACTACTACTCCT	1	40.3992	332	1	42.2839	333	1	35.585	332
1107	RM11993	CTCAAGGGTTAACCACAATGG	ATACACCAACGACTTCAACACC	1	40.4308	481	1	42.3173	515	1	35.618	487
1108	RM11994	GTGTTGAGTGTCATTGGTGTATGC	CATATACTCAGCTACCCTCGTATGC	1	40.4312	483	1	42.3179	429	1	35.6185	159
1109	RM11995	TGTCATCGAACAAAGGAGAGAGC	AGGGCTGTCAAGTAGCAACATCG	1	40.4318	178	1	42.3183	178	1	35.6187	177
1110	RM11996	CCGTCGTCAATATTTCTACGACACC	GGCTTAAATTGCCACTGTTCAGG	1	40.4398	146	1	42.3266	144	1	35.6267	160
1111	RGNMS21	AAAGGCTTAGTGTACGTGAGTC	ATACTACCAAACACAATCTTACCA	1	40.4719	291	1	42.3814	291	1	35.6614	271
1112	RM11998	GGGAACTCCATACTGCTATGTCG	AGTAGGGTATCGTCGGTGTCAGG	1	40.5429	246	1	42.4568	182	1	35.7153	217
1113	RGNMS71	GTACATGCAGATAACAGATGGTT	TAAGTAAACAAATACAAGCCAAAG	1	40.5654	111	1	42.4932	111	1	35.7382	111
1114	RM11999	TATGGCACGATGAGTTGAGTTCG	CACCGAGACCACACATGTACTCC	1	40.5708	299	1	42.4985	299	1	35.7435	299
1115	AUT12008	GCTTGCTTGTATCTGCATTGGTAGG	GGGATGATCCACTCTCTGTTTGG	1	40.6508	498	1	42.553	500	1	35.8074	492
1116	RM8134	GCTTGCTTGTATCTGCATTGGTAGG	GGGATGATCCACTCTCTGTTTGG	1	40.6508	498	1	42.553	500	1	35.8074	492
1117	RM12009	CCACCTCCACCTGACCTTCTCC	TCTCCCTCCACTAGTCTTGTTCTTGG	1	40.6532	192	1	42.5554	186	1	35.8098	188
1118	RM12010	GGACCGAATCATGAGACAATGG	TTGATGACGTCAAGCGAGAAACC	1	40.672	284	1	42.5742	278	1	35.8288	278
1119	RGNMS323	AATAAACTAGTCACCTTTCTGCTT	CACCGACAGTTCTTAAACTATATG	1	40.7012	321	1	42.6008	321	1	35.8637	321
1120	RGNMS299	TGAAACTTAAACATCTCCTAGAAA	AAGCAGAAAGGTGACTAGTTTATT	1	40.7014	270	1	42.6011	270	1	35.8639	270
1121	RGNMS414a	TGAAACTTAAACATCTCCTAGAAA	AAGCAGAAAGGTGACTAGTTTATT	1	40.7014	270	1	42.6011	270	1	35.8639	270
1122	RGNMS357	ATAAACCCTAACTATTCCTTCTCC	AAGAAATCTACATGACACCATAGA	1	40.7295	344	1	42.6298	344	1	35.8919	344
1123	AUT12013	ACCGCCTCATTCTTTCCGATCC	AGAGGCGGTAGTATGCTCGTTGC	1	40.7425	97	1	42.6427	84	1	35.9056	97
1124	RM12014	CTCCGCCTCCACACATTACAGC	CTCGGGTTAAGGCTCGAAGTGG	1	40.7566	160	1	42.6568	160	1	35.9196	160
1125	AUT12015	GGCTTGTGTTACTGCGATCTCC	GGTTCACTGCTCAATAGTCACAGG	1	40.7644	461	1	42.6646	489	1	35.9274	483
1126	AUT12016	TCACCTAAAGCAGCAGTATCATCG	AATTAACGGTCGGGAGTCAAAGG	1	40.7764	97	1	42.6779	91	1	35.9395	94
1127	RM12017	CCTGGAGGCTTGAGTACAAATTAACC	CAAGTGAAGGCTGTGCCTATCC	1	40.7769	84	1	42.6784	73	1	35.94	84
1128	RGNMS8	TGATAACAACATTATTTCCATCTC	CACTTATGTAGGTTTGAGTGATCT	1	40.7885	174	1	42.6899	174	1	35.9516	174
1129	RGNMS4	TTAGTATTAATGCTTCATGTGGAT	CTACCAGCATTCTCAATCTAATAA	1	40.7899	280	1	42.6911	235	1	35.9529	280
1130	RGNMS53b	TTAGTATTAATGCTTCATGTGGAT	CTACCAGCATTCTCAATCTAATAA	1	40.7899	280	1	42.6911	235	1	35.9529	280
1131	RM12018	TTAGGCGATCGATCTCATCTCTCC	CAGCTTCCCGTGAGTAGCAACG	1	40.7933	328	1	42.7001	332	1	35.9564	328
1132	RGNMS87b	TTTGGGTTATTGTTAGTCTCATTA	AAGAGGAAGTAAGAGTAAGGTCAA	1	40.7968	282	1	42.7035	282	1	35.9599	282
1133	RM12020	CATATACAGGCTACATGACTGC	TGTGCTTCAGTAAGTGTGAGG	1	40.8317	96	1	42.7383	96	1	35.995	96
1134	RM12021	TAATTTCTGGCACGTACGCATGG	GTAGCGATGCAACTACCAGTGAGC	1	40.8345	463	1	42.7411	407	1	35.9978	393
1135	RGNMS151	ACATATATCTACGTGCACTGAATG	TACTCAACATGCTCATAATTTCTT	1	40.8346	259	1	42.7412	203	1	35.9979	183
1136	RGNMS158	AATGTCACCTAATTAAAGCAATTT	CTTGAGCTCCTCCAGGTCCTCCT	1	40.8354	313	1	42.7419	311	1	35.9986	312
1137	AUT12022	ATGCTTGCAGACAATCGATGC	CTCTCCGCCTAAACAACTTGTGC	1	40.8365	458	1	42.6974	442	1	35.9998	450
1138	RGNMS168a	TACCAATTGTTGTATCCTGTATTC	TCTAACATCCTCATTTCTTTATGA	1	40.8368	246	1	42.6976	230	1	36	238
1139	RM12023	TGCGTACCTCTGCTCCTCTCTGC	GACGAAGCCGACCAAGTGAAGC	1	40.851	93	1	42.7576	84	1	36.0143	93
1140	RM12024	AAGGAGAAGTGGAGGTTAAGATAGGG	GTTAATTTACTGACCGGCCATGC	1	40.9033	278	1	42.8095	278	1	36.0471	278
1141	RM12025	GCTTGCAAGTGAAGTTGTCATGG	CACAAGAGATTCCTTGGTTCTTGC	1	40.9222	181	1	42.8286	181	1	36.0658	185
1142	AUT12027	AATTTGGAGGACGAGGAGATGC	CAGCTGCACCTCTTTCTACCTAGC	1	40.9288	321	1	42.8351	286	1	36.0724	291
1143	AUT12028	AATTTGGAGGACGAGGAGATGC	CAGCTGCACCTCTTTCTACCTAGC	1	40.9288	321	1	42.8351	286	1	36.0724	291
1144	RM8062	CAAATTACTCCATCCATTATT	GAGGAGATGCTAGTTAATTACA	1	40.9289	144	1	42.8352	109	1	36.0725	114
1145	AUT12029	CAGCATCAAGGGTCGCTACACG	CGATGGCGTGGGATAATTACGG	1	40.9307	359	1	42.8371	253	1	36.0743	355
1146	RM12030	AGGTTAGATTGAGACAGAGACACC	AAGTTAGCCTCGCTCTTCTACC	1	40.9325	308	1	42.8388	324	1	36.0762	310
1147	RM12031	TCCCTAGCTAGCTCTCCATCTCC	AGTACTACCGCTACATGTCTTCTTGG	1	40.944	295	1	42.8509	267	1	36.0864	240
1148	AUT12033	TGTGTAGCTGTCAGAAGAAACAGAGG	CACCCTGGAATTCTGCATTAACC	1	40.9597	254	1	42.8693	260	1	36.102	254
1149	RM12034	GTTGGGTGGCATTGCAGATTGG	GCCTGCAGAATTCAGATGGTTGC	1	40.964	79	1	42.8737	79	1	36.1064	79
1150	AUT12035	TTCCTCGATTTAGACTTGCACAGC	GGGAAGGAGAAGTCCCAGAAGC	1	40.9784	193	1	42.8952	187	1	36.1209	190
1151	RM12037	AGTTGCGGCTGCTTGTATTATGG	ATTGAACCAAGCCCGGATCTACC	1	41.0255	124	1	42.9421	120	1	36.1681	120
1152	RM12038	AGACGCACGCAACATCACTCG	GGGTATACCATACTCCCTCCGTTGC	1	41.042	384	1	42.9586	309	1	36.1846	633
1153	RM12041	GAATGGACGGTCTTGATTGACTAAGG	GGATCTAAGCGGGAAGAAATTAGCC	1	41.119	287	1	43.0478	287	1	36.2443	287
1154	RM12043	GGGAACATCTGGTTGATGTACTCG	GATACCGGTGAACACCAAATCG	1	41.2139	275	1	43.159	278	1	36.3397	275
1155	RM12045	CTGTTTGTGCTGTTGGGCTACC	CTTCAGGAATCCAGCAGGAGAGG	1	41.256	198	1	43.1984	198	1	36.3788	194
1156	RM12051	GAACGTGCTACGAGATAGTGTTTGC	GGTCTGCAAGGTCTAACAATGATTCC	1	41.2891	772	1	43.2266	740	1	36.4043	686
1157	RM12050	AACGTGCTACGAGATAGTGTTTGC	CGTACGACATATCGACTATACAGAGG	1	41.2891	604	1	43.2266	572	1	36.4043	518
1158	RM12052	GATCGTGGAAGGGTACGACAGC	TCCGTCGATCGAAACCCTAACC	1	41.3108	256	1	43.2472	256	1	36.4259	229
1159	RM12053	CTTCCCTCTCACCTTCATGTTCC	CTTCATCCTTCCCTTTGATCTGC	1	41.321	154	1	43.2574	158	1	36.436	150
1160	RM12054	GCCGTAGTAGCCTCCTCCATGC	GATCGATCGGTTGGTTGGTTGG	1	41.3255	223	1	43.2619	223	1	36.4406	211
1161	RM12055	GGCCAAATGGACTAAGAAGAAGG	CCCGATGCTTGAAGATATAGTGG	1	41.3846	180	1	43.323	204	1	36.5001	282
1162	AUT12057	GCCGCTAATGTTGTTGTCAAGC	CGAAGCCAACGTAGTCCAATCC	1	41.4759	172	1	43.4347	146	1	36.5818	148
1163	RM12058	CAACGGGAAGGTATCGTCAGC	ACCCACCTCCACACCTACACG	1	41.4826	262	1	43.4411	260	1	36.5885	262
1164	RM12059	AGCGCGAGAGATTTCGGAGAGC	ACCCAACCACCAAACCCAATCC	1	41.4859	225	1	43.4444	222	1	36.5918	222
1165	RM12062	TCTAGCGTGACAAGACTCCTACG	AAGTGGTACATCACGCTACACTGC	1	41.5661	87	1	43.5108	83	1	36.659	87
1166	AUT12063	TCCTGGCTGCTATTGTGGTTGG	AAGTCGTTCGTTGCATGAAGAGG	1	41.5799	185	1	43.5247	145	1	36.673	163
1167	RM12067	CCATTCGCTTCTCCAGTACACG	TCTAGCAAACACAGAAGGAGTCAGG	1	41.6723	293	1	43.6445	289	1	36.7644	297
1168	RM12068	GCTGTAGCTCCGGTCTCTCTCG	AGCAGCAGCAGCCAGTACTACG	1	41.6791	299	1	43.6512	290	1	36.7709	299
1169	RM12071	CTCAGACACGCATGCATTAAACC	CTATGGGCGTTCATTAGCTAGACC	1	41.6845	226	1	43.6566	228	1	36.7763	226
1170	RM12072	CCAAACATACTCATGAGGCCATAAGC	TGAACACCATGCAACATCAAGC	1	41.6971	190	1	43.6692	180	1	36.7888	196
1171	RM12076	AGCTGTGCGAGGAATCCAAACG	CTCCGATCCCAGCAGCTACTCC	1	41.7479	179	1	43.7964	187	1	36.8358	178
1172	RM12078	GTTGAATCCCAGAAGCAAACTCG	GACGCATGCTGCTTACTTACTCG	1	41.7724	470	1	43.8223	462	1	36.8599	462
1173	RM12083	GGCAGTTTGCAGTTTCTTTCACC	CAGTCACATTGGAGATGGAGAGG	1	41.8152	157	1	43.8686	147	1	36.8975	153
1174	AUT12084	AATCGGCGAGGTTTGCTAATGG	ATACGTGGTACGTGACGCTTTGC	1	41.8629	99	1	43.9107	103	1	36.9439	101
1175	RM12085	GGTGCTGAAGGGATCTAATGTCG	CCCATTACACCACTAGCTGATAGCC	1	41.8943	185	1	43.9428	163	1	36.9733	169
1176	AUT12086	GTTAGGTTAACGGGATCTTGTTCG	ATGCAGTCTCCATCATCGAAGC	1	41.8989	197	1	43.9472	177	1	36.9778	177
1177	RM8236	GTTAGGTTAACGGGATCTTGTTCG	ATGCAGTCTCCATCATCGAAGC	1	41.8989	197	1	43.9472	177	1	36.9778	177
1178	RM12087	TCAGGTCAGTATTGCTGCAAAGG	GGTTAATCCAGGAGATGCTAGTCG	1	41.9002	72	1	43.9486	72	1	36.9792	72
1179	OSR20	ggaagaggagagaaagatgtgtgtcg	tcaacagacacaccgccaccgc	1	41.9237	220	1	43.972	236	1	37.0027	224
1180	RM104	GGAAGAGGAGAGAAAGATGTGTGTCG	TCAACAGACACACCGCCACCGC	1	41.9237	220	1	43.972	236	1	37.0027	224
1181	AUT12088	GCTACCATGCACGAAACAGAGACG	ACCAAATGTGGCTGGCTGATCG	1	41.9636	194	1	44.0119	139	1	37.0398	149
1182	RM12089	GGACCAAACCAACCAGAGACG	AGTCCCTACAAGGAGGAGGTTCC	1	41.9768	249	1	44.0249	271	1	37.0529	246
1183	AUT12091	CTGCAAATGCACAGGAATCAGG	TCCTCTCGCCTTTCTTTCTCTCC	1	42.0096	141	1	44.0578	121	1	37.0857	101
1184	RM12093	CGGCGATATACAGTAGTACGTGTGG	TACACTTGTTGGTGGTTGGTTGC	1	42.0386	147	1	44.0874	147	1	37.1146	147
1185	RM12095	CCCACGTACGCACACATATACACG	CAGCCAAACAAACATGCTGTGG	1	42.0966	166	1	44.1059	182	1	37.1326	299
1186	RM12102	GACGGAGGGAGTGCTTTGTACCG	GCATCTGGCGTGGTTCAGTTGC	1	42.1217	181	1	44.1179	220	1	37.1501	199
1187	RM12103	AGTAGCTAGCAGGCAGCACAGC	ATGGATGCATGGAGAGGAAAGG	1	42.1257	84	1	44.1219	89	1	37.1541	84
1188	RM12105	GCATTGCTGGGTTGACCTGTCC	CGATCTGCGTCTTCTTCCATTCC	1	42.1606	237	1	44.1583	234	1	37.1874	240
1189	RM12107	CTGATAGTGATGTCCATTGTGTGAGG	CTTTCCTCTATGCCTAGAAACACACG	1	42.2165	356	1	44.2179	345	1	37.2424	350
1190	RM12108	TCCGGACACGTATCTCATATTTCC	TTCCTCTATGCCTAGAAACACACG	1	42.2167	152	1	44.2181	142	1	37.2426	146
1191	RM12109	CAATTAATCCTCTCCCTAGCAAGC	GAGTTCATGAGTTGAGTTGTGTGG	1	42.2182	155	1	44.2195	147	1	37.244	151
1192	RM12110	TTGGACCATTTAGGTCAGGAAGC	GTTGAGCTTGTTTGGTCCTTTCC	1	42.2192	274	1	44.2205	307	1	37.245	281
1193	RM12112	TCCAGATGGATGAGAGTAGTGACC	GTACATCCATCATCGATCATCACC	1	42.226	362	1	44.2274	379	1	37.2519	485
1194	RM12115	GGGAAATGAACAACAACGTGAGG	AGAAAGAAAGCCGACAGTTCTGC	1	42.2296	340	1	44.2306	376	1	37.2553	456
1195	RM12117	GGAGAAGAGTTGCTTGCCTTGG	GCTTACTTAAACCGCACCACACC	1	42.241	357	1	44.2425	374	1	37.2669	364
1196	RM12118	AGCAGCCATGGTAACTTCCTTCC	TGAAGCTAACTCTGAAACCCAACC	1	42.2433	110	1	44.2448	107	1	37.2692	110
1197	RM12120	TTATTCCCTCTCCTCTCACTCACC	GCAATACGCATTCACTTCATCG	1	42.2696	497	1	44.2712	502	1	37.2956	495
1198	RM12121	TCGGATCATCGGAATAGCAGACC	CCGGTACTACGAACTTGCACTCG	1	42.2703	445	1	44.2718	440	1	37.2962	445
1199	RM12125	GTGTTCGATTCCTTGCTTTAGAGG	ACGAGACGAGACGATACGAGAGC	1	42.2953	667	1	44.2989	656	1	37.3227	637
1200	RM12126	TCATCGTGCAGACCGTCTACTGC	AAGGACCCTGGACAGCGACTCC	1	42.3041	97	1	44.3075	97	1	37.3314	97
1201	RM12132	CTGCCAATATGCAAGAGGACATGG	TAGAAGCCTGCCCACTGAAACAAGC	1	42.3375	171	1	44.3311	113	1	37.3535	113
1202	RM12135	GGGACAGATAGAATCCCATAGCC	CTGCGACTTGCTCTTCCTCTACC	1	42.3661	397	1	44.3764	379	1	37.3811	368
1203	RM12136	TAAAGTGGGTGAAGAGGAGAAAGC	ACAGGTTCCATATTCCTGTTGC	1	42.369	182	1	44.3792	182	1	37.384	179
1204	RM12137	TGGAGCAACAGGAATATGGAACC	CTTCCCAGTGTGCGAAGAAATCC	1	42.3691	238	1	44.3794	232	1	37.3841	232
1205	RM12138	AGCTTGTTCAGCCGCCATAGCC	GTCGAAGCGTTGGTGAGATTTGG	1	42.3799	95	1	44.3888	104	1	37.3936	95
1206	RM12140	CCTACCAACCAATTCTGGTGAGC	ACAGCAATGCCACCCAGTAACC	1	42.4134	91	1	44.4246	87	1	37.4268	91
1207	RM12141	GGACTAGACCTCTCACTTGTCTTACC	CTGTCACGCGGAATAAGTAAACC	1	42.4313	189	1	44.4437	184	1	37.4446	184
1208	RM12142	TTCTCCTCCTCCTCCCACACTGC	GCGCAGGATCCAGAACCTCACC	1	42.4491	89	1	44.4673	89	1	37.4627	89
1209	AUT12143	TTCACCACAACGATAGAGACTTCTGG	GGGAAGAAGATGACAGAGCAAGC	1	42.4664	248	1	44.4938	242	1	37.48	248
1210	RM12145	GAGGAGGCGAAGTCGTGGAACG	GCAAGGAGGCGAGCAAGAAGC	1	42.5116	361	1	44.573	361	1	37.525	352
1211	RM12146	AGTATGCCCTGCCCACTACACTAGG	CAGCGAATGGCAAGAGCAACC	1	42.5138	99	1	44.5752	119	1	37.5272	113
1212	RM12147	GGTAGCGAGATCAGCGAGAGATCC	CAGGTCATGGCGTCACAGAGC	1	42.5248	230	1	44.5915	166	1	37.5382	230
1213	RM12151	CTGCTGTCATGGTGGAACAGG	AGTGCGTGAGAGACATGAGACG	1	42.5452	143	1	44.6105	143	1	37.5583	143
1214	AUT12153	CAAGGAAGATCTTGTGGACCATGC	CTGCAGATGCAGAGGCAGAGG	1	42.552	158	1	44.6265	154	1	37.565	154
1215	RGNMS369	CCAAGCCATATAGAGAGAGAGA	TCTAAAGATCCAAGAACAACAA	1	42.6074	235	1	44.6836	235	1	37.621	235
1216	RM12156	TGTTTGGTTGATGCAGCAAAGG	TTTACGTTCCCTTTGGGACAGG	1	42.6081	399	1	44.6842	408	1	37.6216	356
1217	RM12157	GCAATCAGTTGGAACTTGGAAGC	CAGATCACCTGAGCTGTGTTTGC	1	42.615	354	1	44.6915	348	1	37.6284	326
1218	RM12158	CCTGCGATTCCGACATAATTTCC	ATCGGTGGTATACGCTCTTCTCG	1	42.6256	103	1	44.7039	97	1	37.6389	100
1219	RM12160	ACGACGACCAATCCCAAGACG	AGCAAATCGGAGTACAGGATCAGC	1	42.6703	178	1	44.7513	172	1	37.681	172
1220	RM12161	CAGCGAATACAGTGCAAATGTACC	CATCCTCAGCCTCATCATCTGG	1	42.7014	377	1	44.8523	356	1	37.7773	355
1221	RM12162	CTTGTGGAACTGGAGCATCATGG	ATTTATACATGTCGGGCGTGTGG	1	42.7375	277	1	44.8845	308	1	37.8109	271
1222	AUT12164	GCGTGGAGATTCAGTTAAGTTTCACC	AATTCCGTGTCCGATTTCCTACC	1	42.8145	383	1	44.9686	405	1	37.8892	365
1223	RM12166	ACCGGCGATGGTGTGTATAGTCC	CCTTCTCCTCCATCTCGTCTTCC	1	42.818	198	1	44.9722	198	1	37.8926	198
1224	RM12167	TGTCCTGCTCCTTGATGATCTCC	TTCCACTAGCCCAAGAACTCACC	1	42.8247	178	1	44.9789	190	1	37.8993	180
1225	AUT12168	AATCCGTCAACCACCATGAACG	TTGCAGACTCATGGACACATGG	1	42.8769	144	1	45.0259	137	1	37.9466	134
1226	AUT12169	GAGCGCTAGGGCTTTGGATCG	GCCCATGTACGATGACGTGTACC	1	42.8829	158	1	45.032	162	1	37.9526	174
1227	AUT12170	CAAACATGGGCCAGAATTAAGAGG	GGCAGAGTGAAGAAGAGAGGAGAGG	1	42.8907	148	1	45.0396	140	1	37.9604	140
1228	RM8099	CAAACATGGGCCAGAATTAAGAGG	GGCAGAGTGAAGAAGAGAGGAGAGG	1	42.8907	148	1	45.0396	140	1	37.9604	140
1229	RM12171	GTGATGCTTTCGTCGTCGTTGG	GGAGGACAAGAACAAGAACAAGAACG	1	42.9089	155	1	45.0579	149	1	37.9779	149
1230	RM12172	CTTCTTTGGAGCCACCGCAACC	CCATGCAATCCTCTCTTGTGTCTCC	1	42.9096	115	1	45.0587	115	1	37.9787	115
1231	AUT12174	GGGACCAAGACCTTTCCAATGC	GCGGAAGCAGGAGAATCGTAGC	1	42.9932	229	1	45.1674	205	1	38.0612	223
1232	AUT12175	GGGACCAAGACCTTTCCAATGC	GCGGAAGCAGGAGAATCGTAGC	1	42.9932	229	1	45.1674	205	1	38.0612	223
1233	RM12179	CCATTAGTGAAAGGGAGCAAACC	CGAAAGCTGTCTCTGGAAATTCG	1	43.1169	156	1	45.2944	156	1	38.1842	134
1234	RM12182	GTTACGCCGAATCATGTCATTCATCC	CGGAGAGCATATTCTTGCTTGCTACC	1	43.1814	99	1	45.4185	107	1	38.248	105
1235	RM12194	CGTTGGTCTCCAAGATGTGAGC	CTCGAAACCTACCTTCCACATCC	1	43.5157	295	1	45.7571	292	1	38.495	292
1236	RM12195	ACACATAACACCACACTCACATCC	CTGACCCACATGTCATTGATCC	1	43.5298	440	1	45.7241	420	1	38.5087	396
1237	RM12196	ACACATAACACCACACTCACATCC	CTGACCCACATGTCATTGATCC	1	43.5298	440	1	45.7241	420	1	38.5087	396
1238	RM12198	CATTGGAGGATTATAGGAGCTGTCG	CCCACTTTCGGATCACTTCACG	1	43.5662	74	1	45.7963	70	1	38.5393	76
1239	RM12199	TCACATCCACACCTCTTCTGTGC	GAGCGGAGTAGTAGTACGAGCTTGG	1	43.5666	78	1	45.7968	78	1	38.5398	82
1240	RM12200	GACCGAGACATCTTACATACTCTTGC	GGAGTAGTGAACAGTGTTGGTTGG	1	43.5674	81	1	45.7975	81	1	38.5405	81
1241	RM12204	CCTTCCTAATACCCTGTCATCTGC	GCCCTTTCTTTCACTTGATTGG	1	43.6094	250	1	45.8166	172	1	38.5625	210
1242	RM12206	GGGCTGTCAACTTCTGATTCACC	AGCTCAATTCTTGTGCCTGAGC	1	43.6521	283	1	45.8631	280	1	38.6025	286
1243	RM12209	TTGCCATCCATTCGATTTCACC	GAGACCACCAGATCGCTTCACC	1	43.7376	83	1	45.9722	83	1	38.6882	91
1244	RM12212	CCTTCCTCCTCTCCTCTCACC	AACAGATCGAGATCCAGCTTGC	1	43.8206	214	1	46.0562	214	1	38.7587	214
1245	RM12213	GGTCCTAGTGCACGGCTTGTCC	ACCGGTTGTGCACACAAATTGC	1	43.8463	98	1	46.1103	98	1	38.7846	89
1246	RM12216	ATATTTAGCCTGCCCGTAATGC	GGTTGAACATACATTGGCATGG	1	43.8874	331	1	46.1508	327	1	38.8254	322
1247	RM12224	GCTTGCTTCTTGTGCAGTTTGC	AGCTGCTCCAGTTCAATTCATGC	1	44.0445	279	1	46.3044	279	1	38.9781	279
1248	RM12225	AAGACTGACATTGAACCCAACC	CAATAACTTGTCGGGCTATCTTCC	1	44.1406	139	1	46.4227	139	1	39.07	139
1249	RM12226	ACTAACTATTGCGGCCTCATCTTTCC	AGTTATGGTCACCAAGCGAAACG	1	44.1521	186	1	46.4331	196	1	39.0804	192
1250	RM12227	TGACGATGGCAGCAATTAGCC	CTCATGCTTGCTTCGTCCATGC	1	44.1561	130	1	46.409	127	1	39.0844	127
1251	AUT12228	CAACCAGTTCCTCCTCCTATGACC	TTTGAAATGGTGGAGTCCAAGG	1	44.1719	217	1	46.4529	217	1	39.101	220
1252	RM12229	GCAGAGAAACAACAGTCAACAGC	TGATGACCATGTGGAAGTATGC	1	44.1766	146	1	46.4567	140	1	39.1058	152
1253	RM12230	CACCTGTTGTGAATCTGTGATCG	CGGTGGAGCTTGTTATACTACTATGG	1	44.1769	247	1	46.4569	251	1	39.1061	263
1254	RM12233	CTTGAGTTCGAAGCGAGAAGACG	CACTTGAGCTCGAGACGTAGCC	1	44.2116	82	1	46.49	82	1	39.1404	79
1255	RM12236	GTTATTACTGCTTCCTCCGTTTCACG	TGGTTCCCAACAACTGATGTAGC	1	44.3347	383	1	46.593	837	1	39.236	326
1256	RM12237	CGTCCTCATCGTCATCATCTCG	GGATGAGGAAGGACGTAGACATGC	1	44.3577	116	1	46.6152	116	1	39.277	116
1257	RM12239	TGCGAGCCATCACCAACTACG	ACCATGAGCTGCTGGATCAGG	1	44.3744	153	1	46.6314	153	1	39.2939	153
1258	RM12240	GAGATTATCGCCGTTGATACCG	CTCTTCCTCGGCTTCTTGTCG	1	44.3748	256	1	46.6318	250	1	39.2943	250
1259	AUT12241	GGATACTCTATGTTCCTCTGCTGTGC	GTCTCCGCCGTCTCGTAAACC	1	44.4101	147	1	46.6671	147	1	39.3288	141
1260	RM12242	TTTCTTCTTCCGGTAGCCAAAGC	GGTGGGATGATGATGATTGTATGG	1	44.4463	283	1	46.71	279	1	39.364	287
1261	RM12245	TCCATCACTGGCACTGCTTGC	GTTCTTGCCGTCGTTGTCATTAGG	1	44.525	400	1	46.7656	455	1	39.4155	406
1262	RM12246	ATCTGGACAACAACTCTAGCATCG	TCCTGCCCTTCCTTTCTTTACG	1	44.5385	328	1	46.779	314	1	39.4291	295
1263	RM12247	ATCTGGACAACAACTCTAGCATCG	TCCTGCCCTTCCTTTCTTTACG	1	44.5385	328	1	46.779	314	1	39.4291	295
1264	RM12248	CATTATCTGAATCCGGAGGAAGTAGC	ACACAAACCCTCGCCTCAACC	1	44.5637	579	1	46.8086	551	1	39.4546	563
1265	RM12249	CATTATCTGAATCCGGAGGAAGTAGC	ACACAAACCCTCGCCTCAACC	1	44.5637	579	1	46.8086	551	1	39.4546	563
1266	RM12250	ACTACTACTGCAGCTTCCAGTCC	AATTTACTACGTTCGGGTGAGG	1	44.5753	356	1	46.8202	358	1	39.4661	350
1267	RM12251	TTAGTGGGTCTGATCATTGTGTCAGG	TGTTTCTCGGTAGTGAGGGAAACG	1	44.5779	158	1	46.8228	162	1	39.4687	156
1268	RM12253	TCTGGAGGTTGAAAGCTGAAACG	CGACTATGTCGGTGCCAAATGC	1	44.6135	351	1	46.8535	338	1	39.4913	321
1269	RM12254	TGGCTTCGAAAGTGAGGGTAGC	GTGTACTTGGTGATGGAACACAGC	1	44.6203	197	1	46.8603	197	1	39.4981	197
1270	RM12255	CCTCCCGTAAATAGTCCATACAGC	CTTCACGCATCCACTGATTATTCC	1	44.6473	98	1	46.886	98	1	39.5204	101
1271	RM12261	CAGGCAGAAACACACAGAGATCG	CGTCTGCTGGCGAGACTACTAGC	1	44.7128	168	1	46.9478	168	1	39.5723	171
1272	AUT12263	CCCAGGAATATCTCTATACACACAGC	CTCTACCTCGCTGTTGTCTCTGC	1	44.719	145	1	46.954	124	1	39.5785	151
1273	RM12269	CTCTACAGCTTGAGTTTGGTACATCC	GTGTTGGTGAGCTAGCTGTTGC	1	44.7284	96	1	46.9657	87	1	39.5879	96
1274	AUT12275	ATTGCGTGGGATATGGACTATGC	CCTCTTCAATTCCCTTCCTCTGC	1	44.8389	77	1	47.0669	67	1	39.6623	83
1275	RM12276	GTCGACGGCTTCCTCAAGATTGG	TGAGACCTCTGTGAAGGCACTCG	1	44.8392	188	1	47.0672	168	1	39.6626	172
1276	RM12279	GCAAACTTCAGCTATGACTTCG	GGGACCATCTACTTCTTATGTAGG	1	44.8513	573	1	47.0787	581	1	39.6742	573
1277	RM12280	GTTGATGGGTTGGCGATATAATCC	AGTTAGGGCGAGGCTATCTAGGG	1	44.8534	381	1	47.0808	375	1	39.6763	385
1278	RM12281	ACGGTTGGAAGAGAGAATGATCG	GCCCTGTAGGTAAGGAAGGAAAGG	1	44.8701	79	1	47.0984	59	1	39.6939	71
1279	AUT12285	CGACTGGAAGAAGGGATCATGG	CACACTACCAAGACTCCGCTATGG	1	44.9676	201	1	47.2178	144	1	39.7811	195
1280	AUT12286	CTCACTCACTGACCCACAACTCC	TTAAGATGATGGCTCCTCTCTGC	1	44.9737	189	1	47.2277	183	1	39.7872	186

## Sheet: Chr 2
	Marker Information			Oryza sativa ssp. japonica			Oryza sativa ssp. indica			Oryza rufipogon
Sl. No.	Marker Name	Forward Primer Sequences	Reverse Primer Sequences	Osaj_CHR	Osaj_Position (Mb)	Osaj_Exp. Amp. (bp)	Osai_CHR	Osai_Position (Mb)	Osai_Exp. Amp. (bp)	Oruf_CHR	Oruf_Position (Mb)	Oruf_Exp. Amp. (bp)	Nature of Translocation
1	RM12551	TTGCCTCCACCTTTGATGTCTGG	TAGCGTAGCGCGTGGTAATGACG	2	4.1069	144	2	4.80151	146	5	3.29272	139
2	RM12673	TTGGTCACGAGCCAGACACATGC	ATGCAGTCAGCGTCAGGTCATGC	2	5.67765	97	2	6.57501	97	3	21.4144	97	Inter-chromosomal
3	RM12674	TAAATGCCAACCAACTCCAAGC	AACTGCGTTTGGGAATATCTCG	2	5.68757	283	2	6.58244	307	3	21.4242	283	Inter-chromosomal
4	RM12676	ACTGACGATTGGGCACATTATTCC	CTGCAAATTGGTGGGTGATTGC	2	5.74151	256	2	6.63562	252	3	21.4772	252	Inter-chromosomal
5	RM13068	GTGAGCAGGCAGAGGATGACG	ACTCGAGGCCAATTTCTTCCTTCC	2	12.5621	191	1	20.9595	188	2	11.6551	188	Inter-chromosomal
6	AUT13178	ATTGCCCTTTGGTAGGAGATACG	TCCCTATGGAAGGAAGAAGATGG	2	16.6789	299	8	10.2521	287	2	14.926	280	Inter-chromosomal
7	RM13283	CATCGACCAACTTTGCAAGTACC	CACAGCCCATCCAACATTTAGC	2	19.2623	370	11	16.9865	282	2	17.319	234	Inter-chromosomal
8	RM13284	CATCGACCAACTTTGCAAGTACC	CACAGCCCATCCAACATTTAGC	2	19.2623	370	11	16.9865	282	2	17.319	234	Inter-chromosomal
9	RM13326	AAAGCTTCCTCTCGCCGAATCC	GAGGTCGTCGAGGACGATGTGC	2	19.9801	349	2	20.4875	349	4	18.6329	349	Inter-chromosomal
10	RM13381	AATGGGATATAGAGGCTGTTGC	TACTAGCAGTCTTCTCACCTGAAGC	2	21.1074	287	3	30.7433	335	2	19.1059	285	Inter-chromosomal
11	RM13436	CGGATTTACGGTTCCTTGATAGTCG	CGGTACCACACCTTCGTCAGC	2	22.1035	579	6	6.57728	644	2	20.0457	579	Inter-chromosomal
12	AUT14032	TCCTTGAGTCGATGCTTATCTTGG	ACCTCAAATATCCCAGCTTCACG	2	33.8533	188	8	28.8881	184	2	31.0909	188	Inter-chromosomal
13	RM14208	CCACTGGTAGGTGGTTATTGTGAGC	TGTTACCCAATCCATCCATCACC	2	36.3884	339	6	0.920558	315	2	33.5451	308	Inter-chromosomal
14	RM14209	CCACTGGTAGGTGGTTATTGTGAGC	TGTTACCCAATCCATCCATCACC	2	36.3884	339	6	0.920558	315	2	33.5451	308	Inter-chromosomal

## Sheet: Chr 3
	Marker Information			Oryza sativa ssp. japonica			Oryza sativa ssp. indica			Oryza rufipogon
Sl. No.	Marker Name	Forward Primer Sequences	Reverse Primer Sequences	Osaj_CHR	Osaj_Position (Mb)	Osaj_Exp. Amp. (bp)	Osai_CHR	Osai_Position (Mb)	Osai_Exp. Amp. (bp)	Oruf_CHR	Oruf_Position (Mb)	Oruf_Exp. Amp. (bp)	Nature of Translocation
1	RM14830	GACTGGCCTAGGTACTGAGAAGG	TGGCTATCAACAGTAGATGTAGGG	3	11.1541	248	2	18.7557	220	3	10.7361	226	Inter-chromosomal
2	RM14865	TGGAAGAGGAATCAGGCTAATGG	AGGCGTTCTCAGTGGCTAATGC	3	11.7732	525	2	35.7839	448	3	11.3612	496	Inter-chromosomal
3	RM15072	AATGCTGCTGCTACCTGCTACCG	GCAGGCACGTCAAACAAATGG	3	15.8889	164	9	21.0568	164	3	14.792	156	Inter-chromosomal
4	RM15083	CCGCTCAAGTACACGCACAGC	GAAGGAGGTGGTGGTGCAAGC	3	15.9881	80	8	23.2508	80	3	14.8845	83	Inter-chromosomal
5	RM15128	CTCGGGCCCAAGCTACTTCAGG	GTGCCATGTGGTGGCTTAATATCG	3	16.3441	222	1	13.6173	236	3	15.2652	240	Inter-chromosomal
6	RM15142	CGTGTCCACCAATAGAAACACAGG	CCGCGTGAGGAGAGTAAAGAGG	3	16.4623	279	3	17.6579	273	1	26.7113	285	Inter-chromosomal
7	RM15143	GACGGTGTCGAAGACGAGCTTGC	CGATGGCGTCAGTGAGGATGC	3	16.4778	171	3	17.6734	168	1	26.7268	168	Inter-chromosomal
8	RM15144	TTGTATCAGATCCGTGCCCTTGC	ACCTTCTGGTTGCACAGCTCTCG	3	16.4839	153	3	17.6795	151	1	26.7329	157	Inter-chromosomal
9	RGNMS1333	ACGTTACATTGTTATTTACGCA	TGAATTTGACCATCTGTACCTA	3	16.5158	277	3	17.717	275	1	26.7653	277	Inter-chromosomal
10	RM15291	TACCATCCAACCATCCAAGAACC	CGGTACACCGCTTTAACCTGTCC	3	19.8799	153	7	27.7961	149	3	18.391	149	Inter-chromosomal
11	RM15428	GCAGAAGTTGCACGAGAACACC	GTCGATAGGGAGATGGAGAGAGG	3	23.6118	251	3	26.443	251	1	39.264	251	Inter-chromosomal
12	RM15484	TGCTGAAATATCACCGTACGTGTAGC	GTGCTTGAAGCCTTGTTGTTGG	3	24.4754	269	11	3.76366	269	3	22.4676	269	Inter-chromosomal
13	RM15526	GTACTCCAACGCACAGTTGATCG	AGAAGGTCGATGCAGAAGAGACG	3	25.1229	96	12	16.3349	96	3	23.0048	96	Inter-chromosomal
14	AUT15576	CCAAACATGGCCTTGTAGTAGACG	CTGTGGCTATGCCTTTGGTTGG	3	25.8749	204	4	23.1795	162	3	23.6951	172	Inter-chromosomal
15	RM15577	CGGCGAGACATTCTCCTTGTCG	ATCAAGAATCCTCCGCACCTTGC	3	25.9007	186	4	23.1532	183	3	23.7199	183	Inter-chromosomal
16	AUT16070	CATGCTACATGCAGGATTCAAAGG	TTATTCCGTCTTGGTCGTCAGTCC	3	34.2822	332	6	5.23602	320	3	31.7396	332	Inter-chromosomal

## Sheet: Chr 4
	Marker Information			Oryza sativa ssp. japonica			Oryza sativa ssp. indica			Oryza rufipogon
Sl. No.	Marker Name	Forward Primer Sequences	Reverse Primer Sequences	Osaj_CHR	Osaj_Position (Mb)	Osaj_Exp. Amp. (bp)	Osai_CHR	Osai_Position (Mb)	Osai_Exp. Amp. (bp)	Oruf_CHR	Oruf_Position (Mb)	Oruf_Exp. Amp. (bp)	Nature of Translocation
1	RM16332	ggctacgagcctcctctttctcc	atcccgcctccactttctacacc	4	1.64006	208	8	23.374	208	4	1.48106	210	Inter-chromosomal
2	RM16333	tatggtcctcccattgttgaacg	tgtatggccacctgcttatttgc	4	1.64411	256	8	23.3699	260	4	1.4851	256	Inter-chromosomal
3	RM16493	tcggcagcaacaactcttaaacc	tcaacaagatgactccctgtagcc	4	6.40345	174	2	8.82213	181	4	5.13728	181	Inter-chromosomal
4	RM16535	acgcggtagtcctcttcaatgtcg	ggcgccaacccttcctactacc	4	8.06433	181	4	5.01977	170	6	10.8969	181	Inter-chromosomal
5	RM16550	acagtaccgctgctactgctttgc	tagatagcagcccagcccatgc	4	8.66441	139	3	41.4882	133	4	6.88739	135	Inter-chromosomal
6	RM16553	catagccacttatcgttgttacgc	tgtccatctatgactgtccactacg	4	8.69499	181	3	41.5122	179	4	6.90951	199	Inter-chromosomal
7	RM16554	gcaaccaaagttggtaacgagagc	ccggcgcaatctattagacacc	4	8.73311	128	8	22.4528	140	4	6.92272	132	Inter-chromosomal
8	RM16623	agggagtagctagctcatgaagg	cacaatggaccacaaatactcc	4	12.5475	597	3	40.9996	553	4	10.0874	557	Inter-chromosomal
9	RM16663	ccagatatgccggtcccttaacc	ctcggccgtacaatccctactcg	4	13.8655	236	11	13.6859	236	4	11.1621	236	Inter-chromosomal
10	RM16684	CAGTGCCAAACCCTACCTCTCC	AGCGGCACCATCATCTTCTCC	4	14.7254	379	1	14.7923	376	4	11.6711	401	Inter-chromosomal
11	RM16685	gcctcgtcgacgtacttcttgc	caacaagccgagtgtggtaagg	4	14.772	196	3	11.4738	196	4	11.7173	172	Inter-chromosomal
12	RM16686	ggcactgcttgcatatggatcg	tgccggcgaacttatcctctcc	4	14.778	93	3	11.4678	93	4	11.7234	96	Inter-chromosomal
13	RM16693	gcgtgatagatggatctgttgg	catccgatagtactacctccatcc	4	14.8111	491	5	10.7444	415	4	11.7487	288	Inter-chromosomal
14	RM16694	gcgtgatagatggatctgttgg	catccgatagtactacctccatcc	4	14.8111	491	5	10.7444	415	4	11.7487	288	Inter-chromosomal
15	RM16717	acagcactcatcattccatgtcc	gataactgatcgacgcgacacc	4	15.5498	149	1	16.9111	151	4	12.1874	147	Inter-chromosomal
16	RM16762	ctggatctgtgaggtgtctctagg	aaagaggagttcgcacaagtgg	4	17.2094	99	10	20.0762	99	4	13.5465	93	Inter-chromosomal
17	RM17186	caagaccagaggagaggtgttacg	ctcgttgcgttgctcctaagc	4	25.3438	198	5	19.2084	198	4	20.8257	198	Inter-chromosomal
18	AUT17337	ccctcccgtagaccttgtaccc	ccacagctaaccaatccttctcc	4	28.6741	298	4	27.0932	336	9	5.96875	322	Inter-chromosomal
19	RM17343	CCAGCTTCCAGAGAATGAAATCC	TTGACATATGGAGAGACCGATGG	4	28.7487	126	1	37.2609	120	4	23.942	118	Inter-chromosomal
20	RM17379	tcggactcagcactacgttaccc	gagcacgtaatggaatctgatgg	4	29.6201	196	8	16.9587	221	4	24.7947	196	Inter-chromosomal
21	AUT17398	gttctactagcgtcggtctcgatcc	ctcgacgttgtgcacctcacg	4	30.0396	116	4	28.4622	116	5	25.3555	116	Inter-chromosomal
22	RM17525	tggatgtgactctgtgagaagtgc	gagtggcatgcagaatgatatgc	4	32.5601	278	4	31.1243	281	6	18.5069	283	Inter-chromosomal
23	RM17526	aggttgaagcggagggacaagg	tcggaagcaatggtttacgatcc	4	32.5764	185	4	31.1364	183	6	18.4945	193	Inter-chromosomal

## Sheet: Chr 5
	Marker Information			Oryza sativa ssp. japonica			Oryza sativa ssp. indica			Oryza rufipogon
Sl. No.	Marker Name	Forward Primer Sequences	Reverse Primer Sequences	Osaj_CHR	Osaj_Position (Mb)	Osaj_Exp. Amp. (bp)	Osai_CHR	Osai_Position (Mb)	Osai_Exp. Amp. (bp)	Oruf_CHR	Oruf_Position (Mb)	Oruf_Exp. Amp. (bp)	Nature of Translocation
1	RM17818	TTGCCTCATGTTTGCTTCATCC	AGCTGACAACGACGACACTGC	5	1.59181	240	9	3.97922	227	5	1.4524	203	Inter-chromosomal
2	RM17819	TTGCCTCATGTTTGCTTCATCC	AGCTGACAACGACGACACTGC	5	1.59181	240	9	3.97922	227	5	1.4524	203	Inter-chromosomal
3	RM17820	TTGCCTCATGTTTGCTTCATCC	AGCTGACAACGACGACACTGC	5	1.59181	240	9	3.97922	227	5	1.4524	203	Inter-chromosomal
4	RM18148	AGACTAGGGCGTCACACCAAGC	TGGCAAATTGGCAATCATACGG	5	7.90538	395	10	8.32051	352	5	7.22601	387	Inter-chromosomal
5	RM18149	AGACTAGGGCGTCACACCAAGC	TGGCAAATTGGCAATCATACGG	5	7.90538	395	10	8.32051	352	5	7.22601	387	Inter-chromosomal
6	RM18408	GGCACTCTGGTTCCTCAATGG	TCTGTATCATCAACGGCAACTCC	5	15.2276	178	3	24.9882	176	5	13.0684	182	Inter-chromosomal
7	RGNMS572	TATGCATACATATTTGGACACC	TTTGCTTTATTTCCTCCTTAAT	5	15.8457	316	11	14.8908	313	5	13.4895	255	Inter-chromosomal
8	RGNMS2014	TTAATAATGCAGCAAGTTCATC	TAGAAAGAGAGAGATGGAAGGA	5	15.8478	284	11	14.8929	278	5	13.4915	296	Inter-chromosomal
9	RGNMS589	TTAATAATGCAGCAAGTTCATC	TAGAAAGAGAGAGATGGAAGGA	5	15.8478	284	11	14.8929	278	5	13.4915	296	Inter-chromosomal
10	RM18526	TGCGAATTCCACACCTCCAACG	AAATGGTCCGTGACGGCTTCG	5	17.7652	298	4	20.03	298	5	15.2555	298	Inter-chromosomal
11	RM18527	TGCGAATTCCACACCTCCAACG	AAATGGTCCGTGACGGCTTCG	5	17.7652	298	4	20.03	298	5	15.2555	298	Inter-chromosomal
12	RM18529	GTTTCAGGTTATGGCAGGAAAGG	TTACAGAACTTGGCAAGGATGG	5	17.79	387	9	8.18406	370	5	15.2803	354	Inter-chromosomal
13	RM18530	GTTTCAGGTTATGGCAGGAAAGG	TTACAGAACTTGGCAAGGATGG	5	17.79	387	9	8.18406	370	5	15.2803	354	Inter-chromosomal
14	AUT18659	TCAAGCTGCATTAGGAAGACACC	AACTTAGCTGAAACGCAACACG	5	20.064	221	3	15.0347	177	5	17.3709	183	Inter-chromosomal
15	RM18750	AGCCGGGAAGAGACCAAGAGTCC	GTGACCTGCGCCATCATCAGG	5	21.2545	440	5	22.5968	440	2	27.5698	444	Inter-chromosomal
16	RM18751	CCGTGTGTTGGCTTAGAATCAAGG	GCCACTTTCCAAACATCAGAAAGC	5	21.2588	149	5	22.6064	126	2	27.5741	149	Inter-chromosomal
17	RM18767	TTGAGTGTCCGTGAGTAGGATGG	TTCACATGCCCGATAGATATGC	5	21.528	384	5	22.8587	356	6	24.7214	342	Inter-chromosomal
18	RM18768	CACATTTCCAGCGTTCTTGTGG	CAGTTCTGATCCGTCTTTAAGCTTGG	5	21.5291	153	5	22.8598	153	6	24.7203	145	Inter-chromosomal
19	RM18895	CAAATTGCTAGAGCCTACCTTTCC	CGACTGTCTTTCAATACCGATGC	5	23.9055	183	3	13.6019	177	5	20.8872	183	Inter-chromosomal
20	RM19001	GTTGCACTGCTGATCATGTACG	GGTTTACAAACCCTGAGGTTATCG	5	25.9763	543	6	7.98063	562	5	22.7589	543	Inter-chromosomal

## Sheet: Chr 6
	Marker Information			Oryza sativa ssp. japonica			Oryza sativa ssp. indica			Oryza rufipogon
Sl. No.	Marker Name	Forward Primer Sequences	Reverse Primer Sequences	Osaj_CHR	Osaj_Position (Mb)	Osaj_Exp. Amp. (bp)	Osai_CHR	Osai_Position (Mb)	Osai_Exp. Amp. (bp)	Oruf_CHR	Oruf_Position (Mb)	Oruf_Exp. Amp. (bp)	Nature of Translocation
1	RM19260	CCGGCTAGAAAGAAAGAAAGAGATCC	TCATCTCTGGTTGAAGCCTCTCC	6	0.578164	158	2	14.0289	160	6	0.560007	156	Inter-chromosomal
2	RM19261	CGCATGCCAATTGATCCTATCC	GCACGGTCTATTTCATCCAACTCG	6	0.578611	489	2	14.0294	534	6	0.560453	504	Inter-chromosomal
3	RGNMS2086	TGTGATCTTTGAATCTCTTTGA	CTAAATTCCCGATCATAACAAC	6	0.580248	169	2	14.031	169	6	0.562105	169	Inter-chromosomal
4	RGNMS3817	TGTGATCTTTGAATCTCTTTGA	CTAAATTCCCGATCATAACAAC	6	0.580248	169	2	14.031	169	6	0.562105	169	Inter-chromosomal
5	RGNMS2148	ATGATCCATCTATCAGACCCTA	GGTCAATGATTCAGACATATCA	6	0.580761	293	2	14.0316	299	6	0.562616	293	Inter-chromosomal
6	RGNMS2102	AGGCACAAGTAGAAAGATTGTT	ACTTCTGAATTAAGCTGCTGAT	6	0.581847	292	2	14.0327	292	6	0.563702	292	Inter-chromosomal
7	RGNMS2859	AGGCACAAGTAGAAAGATTGTT	ACTTCTGAATTAAGCTGCTGAT	6	0.581847	292	2	14.0327	292	6	0.563702	292	Inter-chromosomal
8	RGNMS2888	TGATTGATGTTGTTGTTTCTCT	CTGGGTTCTTCTTGGTTAGTAT	6	0.584286	108	2	14.0351	108	6	0.566142	108	Inter-chromosomal
9	RGNMS2269	CTCAGCTCCTTCTCGCAGAGT	GAAGCTAGTAGAACCCTAAGCA	6	3.43915	217	9	1.09125	217	6	3.13817	223	Inter-chromosomal
10	RM19592	GTTGGCATCATCGCTCTTCTAGC	TAATTGCGTGCATCCATCTTCG	6	5.66703	434	6	6.51254	381	12	21.9831	376	Inter-chromosomal
11	RM19637	AGGCCCACCTGTCATCTCTTAGC	GTGAGGTCCACTTGCGTTGTAGG	6	6.37562	134	1	22.8537	131	6	5.84029	131	Inter-chromosomal
12	RM20240	GGTGATGCTCTTATACACTACTCC	TGCCATACCTCGTAAACTATCC	6	22.1651	445	6	22.0465	465	9	2.64279	441	Inter-chromosomal
13	RM20242	CTAGCCAAACTCACTTGTCATCC	GATATGACTGATTGGGACAGTGG	6	22.1985	155	6	22.081	132	9	2.60832	133	Inter-chromosomal
14	RM20244	CATCGAGCTCCAAATTACAGTCC	CTCCTACGGCTCTTAGCTTGACC	6	22.2182	287	6	22.1055	317	9	2.5885	369	Inter-chromosomal
15	RM20245	GAAGAACTACGACTCCGGGTAGG	AAATCTCGATCCTCACGAGACC	6	22.227	439	6	22.1143	461	9	2.57909	442	Inter-chromosomal
16	RM20246	TGGGACCCACCTATGATACTCC	GACAAGCAAGCTGGTCAAGTCC	6	22.2443	184	6	22.1317	172	9	2.56143	176	Inter-chromosomal
17	RM20247	GCGGATTAAGCACTAACAGAGTTCC	GATCAGCTGTTCTTCAGAGCTTCG	6	22.2593	94	6	22.1464	94	9	2.54665	94	Inter-chromosomal
18	RM13704	TCTTTGAGTCTTTGACGCTGACG	AAGACAGGACTGCACGAAGACG	6	23.2544	164	6	23.1122	164	2	24.7242	172	Inter-chromosomal
19	RM20303	ACCTCCGCGTCGTAGAAGTAGC	CAAACCCAAACCCAAGGAGAGG	6	23.677	191	3	9.90392	191	6	20.1648	191	Inter-chromosomal
20	RM20415	CCTCACTCTCGCTCGCTAGCTTGG	CGGCTTGAGGTCGAAGCAGAGG	6	26.0226	125	6	26.3488	125	1	7.74177	125	Inter-chromosomal
21	RM20500	GTTTAGGCCCAAGATTGTCAAGG	ATTAACAAGCAACCGCAGTACCC	6	27.4747	457	12	0.934891	514	6	23.6389	476	Inter-chromosomal
22	AUT20748	AGTGCCTGTTTGTTTCCTCTTCG	CATGGTCAGAGCAAGTTAGTGTGG	6	31.863	387	1	35.0201	404	6	27.6118	381	Inter-chromosomal
23	RGNMS2220	TCCACACAATATTGATCATCTC	CCACGTCGTTATATTGTTACTG	6	31.8631	266	1	35.02	278	6	27.6119	260	Inter-chromosomal

## Sheet: Chr 7
	Marker Information			Oryza sativa ssp. japonica			Oryza sativa ssp. indica			Oryza rufipogon
Sl. No.	Marker Name	Forward Primer Sequences	Reverse Primer Sequences	Osaj_CHR	Osaj_Position (Mb)	Osaj_Exp. Amp. (bp)	Osai_CHR	Osai_Position (Mb)	Osai_Exp. Amp. (bp)	Oruf_CHR	Oruf_Position (Mb)	Oruf_Exp. Amp. (bp)	Nature of Translocation
1	RM12185	GGGCATTGTAGAATGTTCTTGC	CATTTGGTAGAACAACCCTTGG	7	0.172091	545	4	25.1559	513	4	22.1985	991	Inter-chromosomal
2	RM20789	GGGCATTGTAGAATGTTCTTGC	CATTTGGTAGAACAACCCTTGG	7	0.172091	545	4	25.1559	513	4	22.1985	991	Inter-chromosomal
3	RM17271	CATTTGGTAGAACAACCCTTGG	GGGCATTGTAGAATGTTCTTGC	7	0.172615	545	4	25.1554	513	4	22.1975	991	Inter-chromosomal
4	RM20953	TCCGGTAGCCTTCTTCTCACG	AAAGGTCAAACAACCCATGTCC	7	2.54995	244	2	37.8957	114	7	2.23372	344	Inter-chromosomal
5	RM21263	CGTGTATTGCTAAGAAACCGTTCG	TGGTCGCCAGAGATAAGTATCAGC	7	7.41813	371	1	1.84686	356	7	6.69619	354	Inter-chromosomal
6	RM21323	ATTGCGATGTTTGGATGTACCG	AGCAACTCGTCAATGAACATGC	7	8.86991	249	2	24.8859	235	7	8.04649	242	Inter-chromosomal
7	RM21686	GAGCCCATATTAGAGGATCTCAAACG	TGACTGCACGATTTGGTGTGC	7	20.1041	373	4	26.6625	410	7	16.7939	374	Inter-chromosomal
8	RM21687	CGTAAGGATGAAGGATCAACATGC	CAATCCACCATATTGGTTCACTCC	7	20.1057	382	4	26.6642	484	7	16.7955	399	Inter-chromosomal
9	RM22012	AAATCAAGTGCAGCAGTGGTAGTGC	ACGTCAGATCACGCGAGACAGC	7	26.8184	374	2	9.21342	372	7	22.9479	364	Inter-chromosomal
10	AUT22167	CCTCTCACTCTGCCTGCTCTACC	TCTCTAACTCTTGAGTGACAGCAACC	7	30.0924	192	4	27.7152	180	7	25.9387	180	Inter-chromosomal

## Sheet: Chr 8
	Marker Information			Oryza sativa ssp. japonica			Oryza sativa ssp. indica			Oryza rufipogon
Sl. No.	Marker Name	Forward Primer Sequences	Reverse Primer Sequences	Osaj_CHR	Osaj_Position (Mb)	Osaj_Exp. Amp. (bp)	Osai_CHR	Osai_Position (Mb)	Osai_Exp. Amp. (bp)	Oruf_CHR	Oruf_Position (Mb)	Oruf_Exp. Amp. (bp)	Nature of Translocation
1	RM22483	GACCATGGTGTGAGTGTGACAGG	CAAGTCCTACCTCAACCGCTACC	8	4.33315	190	8	4.58817	187	3	8.06619	193	Inter-chromosomal
2	RM22624	GGATATGATTGCTCCGATTAGGG	TCTCACCCATTCGGCTACTGC	8	7.144	207	7	6.67903	213	8	6.29217	207	Inter-chromosomal
3	RGNMS2770	AACATGGTCATCACAGTCATAG	TTAAGAAATACCAACGGAAGTC	8	16.8723	394	1	23.7791	381	8	14.8574	390	Inter-chromosomal
4	RGNMS2792	AACATGGTCATCACAGTCATAG	TTAAGAAATACCAACGGAAGTC	8	16.8723	394	1	23.7791	381	8	14.8574	390	Inter-chromosomal
5	RM23001	CAGTTCCTCTCCTCCACCACTTCG	TGGTGGACTGGAGGGCTACTGC	8	17.932	115	3	4.34767	110	8	15.9487	115	Inter-chromosomal
6	AUT23344	ATGATTGCATCTGCATCACTGC	ATACCTGTTTCCAATGCGTAGCC	8	24.1609	378	8	25.7121	364	8	7.26619	368	Intra-chromosomal
7	RM13048	GTCCTCACCACGAACCTCTCC	GTTTGTCCAAGCACAGGAATGG	8	26.7445	117	8	28.4109	117	2	11.0395	117	Inter-chromosomal
8	RM23508	GTCCTCACCACGAACCTCTCC	GTTTGTCCAAGCACAGGAATGG	8	26.7445	117	8	28.4109	117	2	11.0395	117	Inter-chromosomal
9	RM23509	GTCCTCACCACGAACCTCTCC	GTTTGTCCAAGCACAGGAATGG	8	26.7445	117	8	28.4109	117	2	11.0395	117	Inter-chromosomal
	RM8020	ATCCTCGATGAATTGTATAT	GAAGAGGTGTACATGAATAA	8	4.51675	166	8	4.86783	121	8	4.11317	166
170	RM22494	TGCAAATAGTCCACTTGCTCTGC	GACAAAGCAAACAGAACGGAAGC	8	4.52188	95	8	4.87404	95	8	4.1193	95
171	RM22495	TGCAAATAGTCCACTTGCTCTGC	GACAAAGCAAACAGAACGGAAGC	8	4.52188	95	8	4.87404	95	8	4.1193	95
172	RM22496	TGCAAATAGTCCACTTGCTCTGC	GCTGCCATGATAATCTCTTCTTGC	8	4.52188	775	8	4.87404	303	8	4.1193	269
173	RM22497	GAGAGGAAACAATGGCGATTAGC	AAACACACCCTGAAACGATGAGC	8	4.55769	259	8	4.9089	262	8	4.15457	259
174	RM22498	GCCATGTCCATGAAGGAGTACC	GCAACCAACCAATCACAATTCC	8	4.586	292	8	4.93769	292	8	4.18596	292
175	AUT22499	GTAAGCCATTTGCACGGACAAGG	GAGCTCAGGATCATCCCTACATGC	8	4.5884	288	8	4.94014	312	8	4.18831	288
176	RM22500	GGGAATCTGAAGCTGGCTTTGC	ACCATTCTCATTTCGACCCAAGC	8	4.59315	266	8	4.94491	264	8	4.19306	262
177	RM22501	GGGAATGCCCTAATACATGATGC	AATCGTGCTGGGCATCAATAGG	8	4.60762	255	8	4.95936	294	8	4.20751	324
178	RM22503	CGATGCTGTCGTTCTATTCAAGTAGG	GCGTTTGTAGCGGTGAGTATGC	8	4.66931	420	8	5.03587	417	8	4.26173	468
179	RM22506	AATGACCCATTATGCGGCAAAGC	CCTTTGGCGCACCAACTAAGAGTACC	8	4.72457	393	8	5.09119	445	8	4.3152	376
180	RM22515	TGACGTAGTGGTCCTTGGAGAGG	ATCAACCTTAGCAGCCAGGAAGC	8	4.89916	174	8	5.18412	174	8	4.44533	176
181	RGNMS2883	CCGTTTCTACCTCTACCTACAC	CTGTATATATCCGCCTTGATCT	8	5.10812	395	8	5.37372	395	8	4.55995	391
182	AUT22522	GCTGCACCCTCTCTCAATAAATGC	GTGGACAGCTCGAAACGAAGC	8	5.10824	194	8	5.37383	195	8	4.56007	192
183	RGNMS2781	TAGCTATAGCCATTTCTGTGTG	GAACGAAGCCAGGTAATTAAG	8	5.10865	157	8	5.37425	157	8	4.56047	157
184	RM22523	CGTGCTTAATTACCTGGCTTCG	GCACGTATTCACAGCTAGCAACC	8	5.10878	437	8	5.37438	369	8	4.56061	363
185	AUT22524	GACTTGTGGTTGTTGCTTGTTGG	ACTGCCATATGCATTTCCCTAGC	8	5.11575	175	8	5.3813	147	8	4.56749	169
186	RM310	ccaaaacatttaaaatatcatg	gcttgttggtcattaccattc	8	5.11586	112	8	5.38138	84	8	4.56759	106
187	RM22525	GGAATTCAGTAGCGGCACTCAGG	GCTCCCGGCAGATCAATTTGG	8	5.14859	288	8	5.41254	288	8	4.60028	288
188	RM22526	AATCATCCACATCCACACAGTGC	TCTTCCTTTCCTCCTCTCACTCC	8	5.16446	402	8	5.42838	405	8	4.6102	396
189	RM22530	CTGGTACTATACACGTCTGATTCC	ACATGTACATCCCTGACTATGC	8	5.1885	279	8	5.45104	282	8	4.63411	237
190	RM22532	GCTAAGAGCCCTAGACCCATGC	CCCTCTTGGGAGGGTTACAAGG	8	5.19169	197	8	5.45404	161	8	4.63721	223
191	RM22533	GCTAAGAGCCCTAGACCCATGC	CCCTCTTGGGAGGGTTACAAGG	8	5.19169	197	8	5.45404	161	8	4.63721	223
192	RM22538	ATGATCCATGCACATCCTACGG	GAGACTTGTGGCCTAACCAGTGC	8	5.22293	489	8	5.51048	503	8	4.65698	423
193	RM22539	GTCGGTTGATTAACTCGCAAGC	ACATTGATTGGTCGGTCATTGC	8	5.22563	359	8	5.51301	427	8	4.65892	357
194	RM22540	TCTCTCTCCTCCATCGTTGAATCC	CTGTTGAGCAGGATGCACTGG	8	5.25537	183	8	5.54668	191	8	4.68942	225
195	RM22541	ACATATTCCACACCTCCCTAGCATGG	GCCAACAGCAACCAGTGATGG	8	5.25583	198	8	5.54714	220	8	4.68992	196
196	RM22542	GGAGTTAATTCAACCTGTCTGTCC	ACATGCTTGTTAGGCCACACC	8	5.26045	195	8	5.55183	192	8	4.69471	180
197	RM22544	TTGGTCGCACTCTGATCTGTGC	TGAGACAGCTCGAGTACCTCACG	8	5.27428	178	8	5.49308	166	8	4.70844	169
198	RM22547	CATAAGCATCCACACTGCATTCG	AAAGGGTGATGGAGTGAATGAGC	8	5.36759	251	8	5.63065	255	8	4.78068	249
199	RM22548	TCATGCAGGTGGTCTTGATTCC	AAGACTTGAAGGATCTCACTGTGTGC	8	5.36829	374	8	5.63135	358	8	4.78138	374
200	RM22549	GCCGTCCGATCTGCCATTAGG	TAGGGTTGGTGGCGTGCTTGG	8	5.41718	344	8	5.6786	345	8	4.82839	344
201	RM22550	CATTGCTTCTACTCACATGTCC	GTTTAACCGATACAGGATGTGC	8	5.45072	296	8	5.73171	248	8	4.86194	526
202	RM22551	CTTCGATCTCCTCGTCCTCTTCC	GAGCATGAGATGATGCATGACG	8	5.45167	138	8	5.73261	135	8	4.86312	138
203	RM22552	CAGCAAATCACCGAAGACACTCG	GGGAACAGGATTGCAACAGAGG	8	5.45588	434	8	5.70415	389	8	4.86733	427
204	RM22553	GATGGAGGGAGTAGATTGCAAGG	GGGAGCATCCGATAATGACACC	8	5.47207	460	8	5.75744	519	8	4.88351	460
205	RM22555	GAGTTAGGGATCATCGAGCAAGG	ATCGTGACGGTTAGATAGCAAGC	8	5.6017	323	8	5.90855	327	8	5.02924	319
206	RM22556	TTGGTTGCAAGATGCTCTACACC	AGATGGATGAACGGATTGAAGC	8	5.60319	720	8	5.91004	688	8	5.03073	713
207	RM22559	CAGTTCGTGCAATATTCCCTTGG	CAAACGTCTGGGTCAAGTGATAGC	8	5.70158	277	8	6.04258	259	8	5.12815	277
208	AUT22562	GATCGGAGGAGGGAGGAAGACG	GTCGCATCCACTCATATTCCAAGC	8	5.78805	89	8	6.1499	86	8	5.21544	89
209	RM22568	ATGGTGCAAGTTGTGGTGAATGG	AATCTACTCGCCGGAGGAATGG	8	5.80609	443	8	6.1716	367	8	5.23306	797
210	RM22569	GAACTACGGATTACAACTGCTGATGG	GCGGATGCCAAGAAATAGAAACC	8	5.83915	381	8	6.21321	380	8	5.27259	381
211	RM22570	CCCACTATAGCTGGATGACTCG	GATTCGATCTCGAACCAACTAGG	8	5.8393	285	8	6.21337	282	8	5.27274	285
212	AUT22571	TCCTCCTCCACCTCAATCACACC	CCGAGCTCGCCATTAGCTTGC	8	5.84958	93	8	6.2238	81	8	5.28302	93
213	AUT22572	TCAGCACTCACAGAAGTCTAATCACG	GTCGTTGATCGATCGAGTAGTGG	8	5.85532	141	8	6.22889	129	8	5.28835	129
214	RM22573	ACGAGATGGGACAAGACAGATCG	CATTGAGGCGACTGAAAGAGAGG	8	5.85582	389	8	6.22937	390	8	5.28883	389
215	RM22579	GGGCCGAAAGGTACACTAATTTGG	CATAAGTTCACCGCACATTGAAGAGG	8	5.97259	469	8	6.35451	470	8	5.39588	452
216	RM22580	GTCCTGTGCCATCATTCTTTGG	TTGCTCGAGTTTGGTCAAGTTGC	8	5.9994	467	8	6.37709	467	8	5.42653	467
217	RM22581	GATACAAAGCATGTCTCCATCC	GGATGTTGGGTCTAAGAGTAGGG	8	6.00647	524	8	6.41628	529	8	5.43361	536
218	RM22584	GATCTCATCTGTGCGGGAGAGC	CCATGTTACTCCCGTCACTATTTCC	8	6.08492	265	8	6.49826	257	8	5.52667	265
219	RM22588	GCTCATCCATTAGCCAAGAGTGC	AACTGACCATCCTTTCCAGAATCC	8	6.16753	345	8	6.68773	348	8	5.60177	345
220	RM22589	TGCATATGGTACACACCTCTTTGG	CTTGTATGGGAGGATCGGATGG	8	6.19666	85	8	6.71898	86	8	5.6268	85
221	AUT22592	TGCTCCTCCACCTACTACCATCC	GCAGAAATCTTGACAGAAGAGAGTGG	8	6.2049	179	8	6.72846	175	8	5.63613	176
222	RM22601	GGGTGATTCTGGGAATGACTGC	CACACCTGACCTCCTTGAGAACG	8	6.4188	107	8	6.92767	104	8	5.8594	104
223	RM22612	CTGATATGATGATCCCAACCTTGC	GAGCTAGGCATAGAGCGAGAGG	8	6.72266	299	8	7.39682	275	8	6.0755	284
224	RM22613	TTTCTGGCCCAGTTCAGTACAGC	TGGTGCGTACATATCCCTTTAACC	8	6.73136	193	8	7.41151	223	8	6.08352	187
225	RM22614	CCTTGTATCAGAAGACGCAGAAGC	ACTCCGGATGTTCCTCAACTGC	8	6.73657	259	8	7.41659	253	8	6.08876	254
226	RM22615	TGCAGACAGTATGAGAGTGAGAGAGG	GCAAGAGGGATCACAGAGCTAGG	8	6.75183	235	8	7.4308	249	8	6.10397	251
227	RM22616	GACAAAGGGTGGAGAATCAATGC	GTCGGGATTTAATGGAAGGTATGC	8	6.76258	351	8	7.4498	315	8	6.11567	324
	RM72	CCGGCGATAAAACAATGAG	GCATCGGTCCTAACTAAGGG	8	6.7637	180	8	7.44993	144	8	6.1158	153
228	RM22628	GTGATGGACGGTAGATGGAACC	CTCACACACGAGGACTTTATCACG	8	7.2253	416	8	7.61515	846	8	6.36834	422
229	RM22629	CGAATGCATGGCACTGTTCACG	AATGCAACTTTAGTGCTGACCCTTGG	8	7.25705	442	8	7.64112	803	8	6.38757	377
230	RM22630	ATTCATACGGTCTCCGGTCTGC	CCTTAGCCGAGGCTTAGAATTGC	8	7.25966	265	8	7.6441	117	8	6.39011	281
231	RM22633	TTTCACCACTGTAGTCTCTCTCC	CTCGACAGTTTCTTAGCTAGTCC	8	7.32713	208	8	7.67003	222	8	6.44618	1301
232	RM22634	TTTCACCACTGTAGTCTCTCTCC	CTCGACAGTTTCTTAGCTAGTCC	8	7.32713	208	8	7.67003	222	8	6.44618	1301
233	RM22638	CCCATCTAGAATCCCAGATTTCC	AAGCTGAGGATGAGGCTGTGG	8	7.48761	296	8	8.03763	296	8	6.57721	296
234	AUT22639	CCATTCTATCCAATGGCTTCTCC	CCTTTCTCAGAGGATGCTATCAAGC	8	7.49269	662	8	8.04272	662	8	6.5823	988
235	RM8019	CAAGACAGATAAAGCATTAA	GTAGTTTTGAAGTGATGGAA	8	7.49269	662	8	8.04272	662	8	6.5823	988
236	RM8019	CCATTCTATCCAATGGCTTCTCC	CCTTTCTCAGAGGATGCTATCAAGC	8	7.49269	662	8	8.04272	662	8	6.5823	988
237	AUT22641	TTTAGCGAAGCAAACCCTCACC	CGAGCCAAGAAGAATGAATCAGC	8	7.55279	274	8	8.1079	274	8	6.66015	274
238	RM22643	CTCTGTTTCATTCACAGTCTGG	CATCCTTCCAGGTATGTATTCG	8	7.56819	189	8	8.12267	197	8	6.67513	189
239	RGNMS2900a	TTGGCTTGTATTGTGTTGTTAT	CTGCTCACAGCAATATGTAACT	8	7.56832	204	8	8.12281	212	8	6.67526	204
240	RGNMS2905	TTGGCTTGTATTGTGTTGTTAT	CTGCTCACAGCAATATGTAACT	8	7.56832	204	8	8.12281	212	8	6.67526	204
241	RM22644	CTAGTTCAACCAGCAACCACAGC	GTCTTATCCACTCCCAACGTTCC	8	7.57275	193	8	8.12725	193	8	6.6797	196
242	AUT22645	CGGAGAGGAGAGGAGGAGAAGC	AACCGAAGCACATACATCACACG	8	7.60469	144	8	8.17272	144	8	6.70634	144
243	RM22646	ATTGCTCGAACGAGGGAGAATCC	AAGGCGCGAGATTCAATGAGAGG	8	7.60485	93	8	8.17288	93	8	6.7065	93
244	RM22647	CCTCAGTTAATGGCGAACACAGG	CATCGACTCTCTTTGCAGTTTGG	8	7.61355	358	8	8.18159	349	8	6.71521	358
245	RM22655	TTCTTGCTCCACCTAGCTCTTGC	CATATACCTGCCATCATGCAAAGG	8	7.7996	265	8	8.44373	327	8	6.89137	220
246	RM22659	GTCGTCGGAGACCACGATAGTCC	CGGCGCGCGACTACTATTACG	8	7.88065	139	8	8.55033	145	8	6.9555	139
247	RM22664	CACTGCTGCCAACATCCATTCC	AAGGAAGAAGTGAAGTGGCATACGG	8	7.9387	198	8	8.58676	1444	8	7.00401	197
248	RM22665	TGCAGGATTGTTGATGAACTCG	CGTCGAATCAAGTTGTGTTGC	8	8.13614	333	8	8.77216	325	8	7.18019	317
249	AUT22667	GATGTTGGTGTGCAGGGTGTAGG	GTCACCACCCTCTACGTACGTTCC	8	8.38429	224	8	9.01245	215	8	7.46272	224
250	RM22668	TCCATGAAGAAGAAGCTGTGG	GATCAACCTGTTCTCGATTGG	8	8.38464	295	8	9.01279	292	8	7.46307	295
251	RM22671	GTCAGGGTGGCTCTTACAGAAGTCC	TATGCCCTAGCACCGACGATCC	8	8.45006	462	8	9.08677	448	8	7.528	460
252	RM22673	TTGTGTTCTTGGCTCTCTTCATGC	GAGGAGGATGCGAGGATGTGG	8	8.47854	96	8	9.11302	96	8	7.55105	96
253	RM22674	TCAATCAATGGCATGTCAGACC	GTGTTACAGTCTGCATTAACCACACC	8	8.4966	124	8	9.13753	120	8	7.56911	122
254	RGNMS2866	TGTGTTACAGTCTGCATTAACC	TGAAATATGCTGTGGTTAGGTA	8	8.4967	229	8	9.13763	225	8	7.56922	227
255	RM22675	TAGACGACTTGTTTAGGTCAGG	GTGTACTAAACTCAGATGGAGACC	8	8.52922	462	8	9.17941	416	8	7.60242	407
256	AUT22676	GGGTGGTGTGAGAAAGAAATATGG	CCATCTTAAAGAAGAAGGCTCTGC	8	8.56688	276	8	9.20776	274	8	7.62044	272
257	RGNMS2775	TAACAGATTCAGTAACCAACCA	GAGCAAGACAGAATCAACAGTA	8	8.57113	151	8	9.21201	155	8	7.62467	151
258	RGNMS2855	TAACAGATTCAGTAACCAACCA	GAGCAAGACAGAATCAACAGTA	8	8.57113	151	8	9.21201	155	8	7.62467	151
259	AUT22678	ACCAACCAGCATGGATGAATTACG	GAAATCGAATCGAGATCGTGTGTGG	8	8.57114	166	8	9.21203	170	8	7.62468	166
260	RGNMS2693b	TCGATTTCGATCTTAATACTAGC	GTAAAGAGAGGTCGACATTAGC	8	8.57131	377	8	9.2122	377	8	7.62485	377
261	RGNMS2803	TCGATTTCGATCTTAATACTAGC	GTAAAGAGAGGTCGACATTAGC	8	8.57131	377	8	9.2122	377	8	7.62485	377
262	RM22679	CCTCATCATCGTCTCCGACTGC	TCTCAAACCCTCAACAATGTCTCG	8	8.57908	167	8	9.21995	145	8	7.63264	155
263	RM22680	CTCTCATCGAGTTGAGTTGTTCG	TACCCTCCCAATCTTCTTCTTCC	8	8.57926	99	8	9.22011	95	8	7.6328	99
264	RM22683	TTGTGCTTCACCCTCAGCTCTCC	TCCTCCTCTCCACCAGAAGAAGG	8	8.67188	150	8	9.35113	149	8	7.71549	148
265	RM22688	CTTCGATCTCTTGCCTGGATACC	CCATTTCGTTGGGTTTCAGTCC	8	8.85585	424	8	9.59985	454	8	7.86765	396
266	RM22689	TGCATTCTTCTCTCGTGTTTCG	GGTTCACCATTCGATTTCATGC	8	8.85977	211	8	9.6038	211	8	7.87152	213
267	AUT22691	TCTACCTTAGCTGTCCTGAATTGG	CACATACCTGTTCCGTTTGATCC	8	8.93543	147	8	9.72306	151	8	7.9439	153
268	RGNMS2907	AAACTCATGAATAAATATGGGC	ACCATTAAGAGGTGAGCATATC	8	8.94853	299	8	9.74393	345	8	7.96221	267
269	RM22692	GAATAAATATGGGCTCCACACC	GACCATTAAGAGGTGAGCATATCG	8	8.94853	292	8	9.74394	338	8	7.96222	260
270	RM22695	CAAGGGATTCACTAACGGTTCCTTCC	CACATTGAACCGTTGCTTTGTGC	8	8.9948	570	8	9.8116	585	8	8.00759	588
271	RM22696	AGGTGAGACTGTGAGAGTCATGC	AGAGTACGAAGCCTCTATCTGACC	8	9.00996	170	8	9.84683	166	8	8.02279	168
272	RM22697	GTCGAGCTTCACCAACGACAGC	CGTCGGAGAGCAGGTCAAAGAGG	8	9.09794	79	8	9.99058	79	8	8.10571	79
273	AUT22698	AAGAACGTGGGCATCCTCTCC	TGCTCCTACTGGAAGCTCAACAGC	8	9.11043	193	8	10.0035	181	8	8.11867	181
274	RM22704	TGCATGCTAGAAGAAGGATGGATAGG	CAGAAAGTTGCTGCCCTGACC	8	9.20352	181	8	10.1478	181	8	8.18441	177
275	RM22705	GCTGTCCTTAGCCATCAAGAAAGG	CACATTTCTGAGAGAGTGAGTGATCC	8	9.20357	172	8	10.1478	172	8	8.18445	168
276	RM22712	ATAGGCCGATGAAGCCGTTCG	GACCTTCACCCTCCAACCATCG	8	9.31145	393	8	10.2455	382	8	8.24762	389
277	RM22713	CACCTTAATTAGCCAGGGAGAGTACC	TTCAGTGCAGTGTTGCTGTTGC	8	9.38184	295	8	10.4186	296	8	8.31801	295
278	RM22714	TCTACAAGTCGCGAAAGATGAGG	GTTCTCGTCCTTGTTCACGAAGC	8	9.38466	265	8	10.4215	261	8	8.32084	261
279	RM22715	CTCCTACGAGTGGGTCGTCACC	GCGAGCTCCTTCTTGAAGATCC	8	9.38593	272	8	10.4227	281	8	8.3221	263
280	RM22716	AAAGAGACACGGGATCGACTGC	ATAGTGTGCACCTGTCCCATACTCC	8	9.41526	220	8	10.4659	206	8	8.35301	224
281	AUT22718	GTGATCGCCCGGCTACAAGAGC	ATCCGCGACAAATTAAGGCTACGG	8	9.48395	194	8	10.4984	182	8	8.42738	194
282	RM22722	CAGATTATTCAGACACACCAGACG	GGAATAGGGTATCTCATCTCTCTTGC	8	9.642	119	8	10.7286	111	8	8.57075	117
283	RM22727	GATGGATGATGGGTACAGGAGAGG	GAACACGACGTGCCATCATTCC	8	9.77024	123	8	10.8873	126	8	8.68892	123
284	RM344	cagagacaatagtccctgcac	gtaggaggagatggatgatgg	8	9.77881	162	8	10.9252	163	8	8.69691	162
285	RM22754	CTCGTCCGACCACTCACATGG	ACATTCGGCTAAACGCAGTAAACG	8	10.0568	475	8	11.1011	459	8	8.98628	595
286	RM22757	CGCATGGTTCCATAATACGAAGG	GGGCACTTAGCTAACACAGTGAGG	8	10.1712	93	8	11.3223	87	8	9.0881	87
287	RM22759	CGAGTAGTAGCACCTCTCGCTCTTCC	CGCTTCCAGACGCTCAACTACG	8	10.19	314	8	11.3301	314	8	9.10057	314
288	AUT22760	CTTGGGAAACTTCACCTCATGG	CTGAGAGAAGCCACAGGATTAATGG	8	10.2937	285	8	11.4392	313	8	9.19798	299
289	RM22763	GGATCTTCTCCCTAAGATCCAACG	CAGGACACCAACCAAACAGACC	8	10.3427	183	8	11.5267	183	8	9.24727	175
290	RM22764	CACATACGGTGCTCGAGGTAGC	ACCTGTCGCCTTTAAACCTTGC	8	10.3625	176	8	11.5468	173	8	9.26735	176
291	RM22766	CAAGAATCTTCTCCAGGACTACAAGG	ACGGCATGACTCCAAGAAACG	8	10.3666	85	8	11.5508	85	8	9.27138	85
292	AUT22767	GTTTAAACTCGAGCTGCGATGG	CAAGATCTCAAGTGCCTAAACTGTGC	8	10.3932	205	8	11.5838	194	8	9.2931	200
293	RM22772	GCCCGAAGAAATCAGAGTAGTAAGG	TTAGCAATATGGTGCCCAAGTCC	8	10.4558	493	8	11.6406	421	8	9.35887	459
294	RM22774	CGCTGGAGAAGACAAGAAACG	TAGAATCGGATCTACGGTTCAGG	8	10.5231	168	8	11.7708	173	8	9.43099	167
295	RM22775	GGAGGCAGTGGTAAGAGAAGAGG	GGTTAGAACTGCTTGTCATGAACC	8	10.5729	669	8	11.8356	655	8	9.47788	661
296	RM22779	CTCCTCCTGCGCCTTCACTTCC	TTCCGCTCACTCTGGCCCTACC	8	10.7805	383	8	12.1041	380	8	9.69111	380
297	RM22780	TACTTGGCCAACTCCAACATTCC	CATGGTTGATGAGTCTTGATGTGC	8	10.797	265	8	12.1229	260	8	9.70253	266
298	RM22783	ATCTCTTCACCGACAAGGAGACG	TCTCCCTGATCTGCTTCTCTTCC	8	11.0299	137	8	12.4044	137	8	9.93205	137
299	RM22786	CAAAGAGGATCGAGATGCTCACC	CCTATGATCTGACGCCCTTCTCC	8	11.0613	184	8	12.4272	155	8	9.95512	181
300	RM22788	GACGTGGACCTCAACCAGAACC	TCGTCGTCGTCGTTGTTCTTCC	8	11.0643	181	8	12.431	184	8	9.95808	181
301	RM22789	ATCTGCTGCTCGCGAATCTCC	CGCCTTCTTCTCGAAGTCATCC	8	11.1018	138	8	12.4575	138	8	9.98414	138
302	RM22804	GGACCAACCTAAGCAGTGACTCG	CTGAAGAGCGATCATCAAATGTGG	8	11.4028	198	8	12.6019	198	8	10.1131	194
303	RM22806	TACACGTGACACACGTCGAAGC	GACTCTAGGAGGCGACAGGTACGG	8	11.4122	198	8	12.6195	190	8	10.1225	198
304	RM22808	GCCTTGGTGTGGATCACCTTCG	CCTGGTGCCGGTTGTAGTTGG	8	11.4155	295	8	12.6228	277	8	10.1258	295
305	RM22809	CAGATTAACCCGAGATTAGCAACC	GTTTGATAGCTCCAATCCTCAACG	8	11.4313	279	8	12.6346	274	8	10.1386	277
306	RM22810	TGCCTGCATGTATCGTGTATTCG	CACTCACATCATCGTCGTCTTCC	8	11.4636	178	8	12.6831	181	8	10.1683	178
307	RM22817	ACGACATAACTCTCAGTGTGC	GAAGAAGTGCTTGTTCTACTCC	8	11.6178	190	8	12.9135	190	8	10.3224	190
308	RGNMS2923	GAGTAATCGAGTATCGCGTAA	AGGTTTAAGGCTATCAAATTCA	8	11.8163	251	8	13.0942	246	8	10.4861	253
309	AUT22822	TGGTGCGTCCTCTTTCTGATCC	GCTATCAAATTCACGAACGCAAGC	8	11.8164	98	8	13.0944	90	8	10.4863	100
310	RM22824	ATTGTCACTCGCGCCTAATTCTACC	AATCCGTGACGTTGAGCTCTTGG	8	11.8432	384	8	13.1276	386	8	10.513	384
311	RM22825	AGCACATCACAAACCTACCCTACC	CCTAATTAATCCCGCGGAACC	8	11.8473	160	8	13.138	136	8	10.5172	138
312	AUT22828	TGGTACGGGAGAACTGGTACGC	AATCGAGCCAGCCTAGCAAGC	8	11.9377	359	8	13.2434	377	8	10.62	334
313	AUT22830	CCCATGTACACAAGCATACAACACC	GTTGGCATTGACACATCGAAGC	8	12.0101	363	8	13.3401	360	8	10.6977	345
314	RM2366	ATTGCCTATATTCATATGGA	GTTATCTGTTACTTCCTTCG	8	12.0101	363	8	13.3401	360	8	10.6977	345
315	RM2366	CCCATGTACACAAGCATACAACACC	GTTGGCATTGACACATCGAAGC	8	12.0101	363	8	13.3401	360	8	10.6977	345
316	RM22832	ACGCCACACCTCTCCTCATCTCC	AGATCGATCCATGCCGCTAGTGC	8	12.2682	93	8	13.6223	93	8	10.9789	93
317	RM22837	ACCTGGGTCAGATGTCTGTTTGG	GGTAGAGCTCCATCCATCTTAGTGC	8	12.465	276	8	13.8336	254	8	11.1198	286
318	AUT22838	CCCATTTGTTGCCATTGACTAGC	ACTCCATGTCCGGGAACATACG	8	12.4696	355	8	13.8396	358	8	11.1244	355
319	RM22847	CAGGACTACATTCAGAGGAGATGAGG	AACCTTCTTACTCCTAACCCACTCG	8	12.8794	297	8	14.1178	297	8	11.432	297
320	RM22849	GCGTAGGTCACGATGTAGTACCC	TGAAGACCAACTCAACTAGTGTAGGC	8	13.1219	356	8	14.2983	356	8	11.6337	356
321	RM22860	TCTCCTCTTTGGGCCATTTACG	AGAGAGGAGAGGAAGTGGGTTGG	8	13.5738	153	8	14.456	153	8	11.9582	153
322	RM22863	GGGTTTGGGTTGTGGAACTATGG	TGCTCGTCTTCTCCACGTCACC	8	13.5969	249	8	14.483	249	8	11.9806	249
323	RM22866	TGCTTGTTCTTCCTCCCAAGC	CTTGCCCGTATTGTGGTCTCG	8	13.8529	198	8	14.8924	182	8	12.208	202
324	RM22870	CCCGGTAGTAGTGGGTTATGTCC	CTAGTCGCCCTGAGAAGAAGACC	8	14.0075	248	8	15.0227	248	8	12.316	248
325	RM22875	GGAGGGAAAGGAGAGGGAGAAGC	TGTGGGTCAAGATATGTCGGAAAGG	8	14.1395	90	8	15.166	87	8	12.4359	90
326	RM22877	CCAAAGTTATCGTGTTCCTTCAGC	GATTGCCTGTGTATCAGGTAGTGC	8	14.2484	566	8	16.4052	548	8	12.5278	536
327	RM22878	AGGAGGAGGAAGGGCTCTCTGC	CCTCCACCTCCAAATCCAATCC	8	14.2668	153	8	15.2476	153	8	12.5462	153
328	RGNMS2969	CCCTAAGCTGTTAACGATTTC	AATAACACAACAAATCAAGCAA	8	14.4157	255	8	15.4265	255	8	12.6884	255
329	RM22880	ACAGCTTAGGGCTTACCGAGAGC	CTCAAATCCTCCAGCCCTATCC	8	14.4157	464	8	15.4265	464	8	12.6884	464
330	AUT22881	CTAACGCTTTGCCTGCTTCTGC	GTTGGGCCCATTACCACTCAGG	8	14.4234	158	8	15.4341	158	8	12.696	158
331	RM22883	TTGCCTCCCTCAACTCATGTCC	ACAACGTGGACAAAGATGACACG	8	14.4312	156	8	15.4476	190	8	12.7035	179
332	AUT22884	CCAGGATCCCGTGGGTAACTCC	GGGTGATGAGGTGGGTGTACTGC	8	14.445	196	8	15.4612	193	8	12.717	196
333	AUT22885	ACTGGGTGTGATCCTTTCTGATGC	GTGATCCCAGATACACGATGTAGGG	8	14.4509	127	8	15.4395	115	8	12.723	128
334	RM22886	GGTCGGAGCTACTCTTCCTAGCC	ACCTCGGCACATTTATACGATGG	8	14.545	356	8	15.5784	824	8	12.7895	341
335	RM22901	GAATAACACGTGGTGGTTTAGG	ACGGCTGTACCCAGAATATACG	8	15.0525	353	8	15.97	353	8	13.1896	353
336	RM22903	GGATCTTCTGGATTGTCTAACG	AGGAGCTCATATCTCTTCAACC	8	15.1157	496	8	16.0702	469	8	13.2522	476
337	RM22905	CACTGCTCACTGCTGCCTTGC	CACGGGAGCTTCTGTCAGTGG	8	15.1936	174	8	16.1582	160	8	13.3187	174
338	RM22907	ATGGTTGGAGGGAGGATCATAGG	ACTCTTCTCCATTCGATCCTTGG	8	15.2662	357	8	16.2129	355	8	13.3796	357
339	RM22911	TGAACAAACCGAGAACTGTCTCC	CCAGATCGCATGGAATATATCG	8	15.4308	341	8	16.4241	399	8	13.5226	701
340	RM22913	GAGGATGCCTCAAGTCTAACAAAGG	AAATTACCACGGTTGAGGATGC	8	15.4836	446	8	16.4841	440	8	13.576	436
341	AUT22914	GGAGCAGCTAAGGCAGATAAGAGG	GCCTTCATGCTTCAGAAGACAGC	8	15.5289	162	8	16.5164	167	8	13.6093	145
342	RM22916	ACGTTGGAACGATCGATGAGC	GCCAAGAGCAAGTCGGACTACG	8	15.5985	484	8	16.5946	508	8	13.6812	490
343	RM22917	CAAGCCTATTGCACCTTCAAGC	CTCGAGCTTGGCTCGTTCTAGG	8	15.6668	401	8	16.6513	445	8	13.7254	401
344	RM22918	ACTCCAACTGTAGTGTTCTGTGC	CCATTTGTCAGTGTGTTGATCC	8	15.6764	410	8	16.6612	378	8	13.7349	352
345	RM22920	CCGCCATTAAATTATCCCATCG	CCTCACTTCCTTGATCTCTTCTCG	8	15.7586	396	8	16.7503	396	8	13.8155	396
346	RM22923	AGCGGGCCTCTTAACTCACTCG	CCAGGAAAGGAGTGGGAGAGG	8	15.8305	142	8	16.879	142	8	13.8873	142
347	RM22924	TTGATCATGCTAGATGGGACAGC	CAAGGGCACGATTAAGAGGTATCC	8	15.9021	494	8	16.9729	915	8	13.9477	442
348	RM22932	TGTTTAACACGTAGCACCAAGACC	TTACCACCCACTATCCATTACCG	8	16.0533	173	8	17.2298	190	8	14.0667	119
349	RM22933	CATGCACATCTGCAATTGATCG	CCTTGAACGATGCCTGAGTTGC	8	16.0606	218	8	17.2369	196	8	14.0737	196
350	RM22934	CATGCACATCTGCAATTGATCG	CCTTGAACGATGCCTGAGTTGC	8	16.0606	218	8	17.2369	196	8	14.0737	196
351	RM22953	GGGAAAGTGCTTTCTGATTGTAGAGG	GCAATTCATTCCCAGATGATGC	8	16.4595	268	8	17.4468	267	8	14.4524	280
352	RM22958	TCAAGGGCCTAGAAGGATCAAGC	GATCCACATTACCAAGGGACTGG	8	16.6349	390	8	17.5557	386	8	14.5996	390
353	RGNMS2942	TGAAAGATAATTTGTTGCAAAG	AGTAGGACAGCTCAAGATCACT	8	16.6354	374	8	17.5562	371	8	14.6001	374
354	RM22959	TACACCACCTGGTTCACCAATCC	CACAAGTGCTGAAGAATCTCACTGG	8	16.67	191	8	17.5822	191	8	14.6283	191
355	RGNMS2678	TTATCACTGCTCTTAGCATACG	TTAATCTCTAAATTGGCCCTTA	8	16.7173	287	8	17.6545	287	8	14.6744	287
356	RGNMS2705	ATTGGGCAGTGTCGTGTGGAG	AAATTAATGGTTATTGCAGGC	8	16.8379	292	8	17.79	292	8	14.8261	292
357	RM22971	GGTTCACGTGTACGACTCAATGG	GGAACCATTCTACGGAACCTTGC	8	16.8533	268	8	17.8067	204	8	14.8414	218
358	RM22972	GTCCATCCTCCGATGAAGTTACG	CCTCACGAATGGCATCCTAATCC	8	16.854	385	8	17.8074	304	8	14.8421	341
359	RGNMS2802	AGCTTAAGCAGTATCTCCAAAG	GGAGATGAAATATACTGGCTTC	8	16.8933	153	8	17.8493	153	8	14.9033	153
360	RGNMS2862	GCAAGGTGAAGTAATAAAGCTC	ATCCCATTTATATGAAACAAGG	8	17.0439	190	8	18.0461	190	8	15.0179	190
361	RGNMS2863	ATGCTGGTGCTACTCTCTCTAT	AATAAAGGAAGAAACTGTTGGA	8	17.0581	378	8	18.0659	377	8	15.0322	377
362	RGNMS2873	AATTCTTCCATGGTTATTTCAC	CATGAACAAATGTTAGCAAGAC	8	17.0715	359	8	18.1166	357	8	15.0454	357
363	RGNMS2874	TCGACAATGATAGAGTGAGAAA	ATTCGACCAGAGATACTAGTGC	8	17.0839	312	8	18.1287	308	8	15.058	312
364	RM22978	ACACGTTTGTACGTTCGTTTCG	GCCGACAAACACTCTCATTGG	8	17.2227	274	8	18.3279	267	8	15.1643	257
365	RM22981	CCACCAAACTATCTCAAGAGTTGC	TGCATATCATGTCGGATCTACC	8	17.4274	269	8	18.6027	316	8	15.4927	267
366	RM22986	TGTTGGTGAACATCTCCCATGC	GTCTCAGAAGAATGCACACACAGC	8	17.5995	177	8	18.7409	177	8	15.6396	177
367	RM22987	CACGTATGCATGGCAAGATCG	AGACATCACCGAAGCCTACAACG	8	17.6287	99	8	18.7702	95	8	15.6688	99
368	RM22988	GCATGACAAGAACCAACCATCC	TCTTCCTCTGCACATTTCTCACG	8	17.629	196	8	18.7705	194	8	15.6691	196
369	RM22989	GCATGACAAGAACCAACCATCC	TCTTCCTCTGCACATTTCTCACG	8	17.629	196	8	18.7705	194	8	15.6691	196
370	RM22990	CTGGTAGCTCTTCGACCACTGC	GGAACGAATGAGTAGCATCTTAGGG	8	17.6451	373	8	18.7774	341	8	15.685	339
371	RM22994	TGGAGGGAGAGTACATTCTAAACC	TCATATCTTGTTCGGTCCTAGC	8	17.722	451	8	18.8723	403	8	15.7692	789
372	AUT22995	ACAGCTTCACGATGTTCTTGTGC	GTCAAGAAGCTCTGGGCTAACG	8	17.7396	147	8	18.8941	156	8	15.7871	147
373	RM22997	AGTCATGGTGTTGGACTGTTGG	CAAGATGGATGTGTGAACATGG	8	17.788	239	8	18.9527	237	8	15.8346	237
374	RM23002	CGTCGGTTCGGTGAGATATAAAGG	AACCCATTCTCTGGCTACATTGC	8	17.9566	602	8	19.0816	593	8	15.9734	586
375	RM23021	CTCAATGATGTTCTCGGCTTCC	GCCACAACGGTCAAGTAAAGAGC	8	18.3864	199	8	19.5763	215	8	16.3785	135
376	RM23026	CTCTGACCTTGAGAAAGGAAATCG	GCATGATCTAATACCGGTGATGC	8	18.5635	196	8	19.6881	196	8	16.5129	196
377	RM23028	CAAATCGATCTGCCTAGTGTGAGG	CAACGGCATAAATCCCATACAGC	8	18.5882	385	8	19.7111	391	8	16.5373	385
378	AUT23036	CGTTTATATGAGTGCCACATGACG	ACTTGAGGTTCTGGGCAAGACG	8	18.8516	237	8	19.981	212	8	16.8149	225
379	RM23039	ATCTTGGAAATGGACTGGAGAGC	AGTAGGGCATGTCACAGGTGAGG	8	18.9129	287	8	20.0328	286	8	16.8741	287
380	RM23040	CGTTTCCCATCCCTCTCAGATCC	GAGGTGCTTGGCATGGAGTAGG	8	18.9134	87	8	20.0333	87	8	16.8745	87
381	RM23043	TTAGGGTAGGGTTTGCTCAATGC	GCGACAAGTTACTGTCCATCTGC	8	19.0008	367	8	20.1202	400	8	16.9557	359
382	RM23044	CTGTGACCCAGTCAAATTAACGAAGG	GCCTAATTTCGTTCCCATCTTCTTCC	8	19.0031	99	8	20.126	102	8	16.9579	99
383	RM23052	CATCACCCATCCTTCTCTTCTCG	CGAACACGAAGAACAACACAGAGG	8	19.1315	204	8	20.2368	200	8	17.0833	204
384	RM5982	ACCCGCCCTGCAAATCAC	CGTCGTGTTGTGATGTGATG	8	19.1317	173	8	20.2369	173	8	17.0835	173
385	RM5982	TGTTCTTCGTGTTCGCTGCTTCG	ATCAACGCCTCCCAGCGATCC	8	19.1317	173	8	20.2369	173	8	17.0835	173
386	AUT23053	TTCAGCAGAGAGATGACGCAAGG	GTACAAACCAGCCCTCCGAGACG	8	19.1538	189	8	20.2586	174	8	17.105	189
387	RGNMS2713	ACCCTCGTCTCCCTCACTGTC	CCTGTTCAGCAGAGAGATGAC	8	19.1539	159	8	20.2587	144	8	17.1051	159
388	RM23056	GCGAGAGAGGAGAAGAGACATGG	AGACGAACACCACCATCACAACC	8	19.1596	196	8	20.2641	196	8	17.1108	196
389	AUT23058	GAGGACACTGACGACAGCTTGG	CGCGCAAATCATTAAGTTCAGG	8	19.2688	185	8	20.365	187	8	17.2185	185
390	RM23062	GGTCACATCACATATACCTTGG	CCTCTCCTACACAGATCTTACCC	8	19.4115	396	8	20.5294	426	8	17.3566	416
391	AUT23063	CGTCAGCCGAAACTACTATCTAAACC	GTTTCACTGCACTCTGGTTTGC	8	19.4279	292	8	20.553	312	8	17.3803	305
392	RM23065	GTGACGTACTTGCGTGCGTAGG	ACGTACGTCCTGCATCTGTGTGC	8	19.4737	141	8	20.5999	149	8	17.427	141
393	RM23066	GTTTCAGTGCTAGTGCTTCTTCAGG	TCGATCGTTAGTGCTTCACATCC	8	19.489	274	8	20.6227	270	8	17.442	254
394	RM23067	CGTAAGCCAAATGAGCCAAGC	GCAAGCCTTCATGTTGAAACACC	8	19.5355	299	8	20.7	259	8	17.4866	288
395	RM23069	CCACGAACTCTCCCTATATCTACTGC	CGTGCACACCTGAAGAGTATGG	8	19.5638	273	8	20.7266	285	8	17.5153	665
396	RM23071	GTTCCGCCGTTGAGTGATGACC	TCCTCAGTCCTCCCTCTCCTTCC	8	19.6447	80	8	20.8029	70	8	17.5895	80
397	RM23073	AAGCTGGCCGTTGAAATTACTAGC	GAGCAATCAAAGCATGGTGAAGG	8	19.6603	277	8	20.8197	346	8	17.6047	257
398	AUT23076	GTGTTCTGATGTTCCCTCTCTGC	CCAACAAGGACTCACATGTCTCG	8	19.7076	119	8	20.9264	99	8	17.6517	105
399	RM23077	TGTTTGGGACCTTAGTGATTGG	CATGATGCCATGGTGTTAAAGG	8	19.7313	160	8	20.95	196	8	17.6753	170
400	RGNMS2758	ACCAAATGCTACATTATGTCAA	ACTGCAAGTTCCTATCAGTTCT	8	19.8285	335	8	21.077	336	8	17.7729	349
401	RGNMS2822	TCTAAACAAAGGATTTACCACC	TAGTCGAAATACCTTACGATCC	8	19.8326	380	8	21.0811	376	8	17.777	392
402	AUT23092	TTCTACGGAATTTCTCCCTCTGG	CTAATCAATCTCTCGCGTTCTTGG	8	19.9239	161	8	21.1287	167	8	17.8692	155
	RM342A	CCATCCTCCTACTTCAATGAAG	ACTATGCAGTGGTGTCACCC	8	19.9602	147	8	21.2396	144	8	17.9588	144
403	RM23099	GACACGCCTGGAGACAATAGTAGG	TTTATTCGGGATGCGTGATGC	8	20.0378	351	8	21.2491	365	8	17.9725	293
404	RM23104	GCCATCGAAGACAAAGGTATGC	GTGGCAGGTTAAGCAAATTACGC	8	20.125	287	8	21.368	279	8	18.0101	277
405	RM23107	CCTCTCCACTCCACTCACCAACC	GAAGCTTGCAGCGTGGGAACC	8	20.1486	95	8	21.4234	99	8	18.0332	91
406	RM23109	AGATGGTAAACACAGTCTGACC	AGCAGCACATCACTAGTAGCC	8	20.2096	329	8	21.5208	424	8	18.0932	701
407	RM23116	GTTCATTTCGCGTTCTGATTCC	TTGCCGTTTGTTAATGCAGAGG	8	20.2824	198	8	21.5827	198	8	18.1626	201
408	AUT23121	CGAGATACGGTGAATGACACACG	ACCAATCAGAGAGCACACACAGG	8	20.3742	379	8	21.624	374	8	18.2495	379
409	RGNMS2968	CCTACACAGTTGATTTACAACG	TATGCAAATATGATTGAACGAC	8	20.4027	230	8	21.6387	216	8	18.2787	220
410	RM23123	CATGGTGTTTGGAGGAATGAGC	CAATAAGAGAGCACGCACATGG	8	20.4033	467	8	21.6393	469	8	18.2793	475
411	RM23126	CTTCTCAGTTCTCCACATTTCTCC	CGGTTAGCCTTGAAGAGTGAGG	8	20.4413	185	8	21.6476	163	8	18.2879	283
412	RGNMS2809	TAATATGCCCAGTTCAACTACA	AATTAATTAAGAGCCAATCATCA	8	20.4414	138	8	21.6477	140	8	18.2882	138
413	RM23131	CTATTGGTCGCGGAAGTAAAGACG	GACGGTGAGGAAGGAGGAACC	8	20.4962	396	8	21.7299	390	8	18.3424	396
414	AUT23133	GAGCTTGCAGAGGACGGTGTCTACC	GCCGGCCACAATCCAAATTCC	8	20.5694	122	8	21.7893	131	8	18.4142	122
415	AUT23134	TCGGCTGATCTGACCGTACATCC	GTGCATGCAACCACCTCTTGG	8	20.574	184	8	21.7938	178	8	18.4187	182
416	RM8265	TCGGCTGATCTGACCGTACATCC	GTGCATGCAACCACCTCTTGG	8	20.574	184	8	21.7938	178	8	18.4187	182
417	RM23135	GCATTCACTGGTGTAATCGTTGG	CCACCAGCCAAACATATAACTCTCC	8	20.5945	463	8	21.8199	400	8	18.4392	409
418	RM23136	GCATTCACTGGTGTAATCGTTGG	CCACCAGCCAAACATATAACTCTCC	8	20.5945	463	8	21.8199	400	8	18.4392	409
419	RM23137	GTCAACTCCGACACCATCAGAGC	ACGAACAGCACCAAACACAATCC	8	20.6189	171	8	21.8428	163	8	18.467	171
420	RM23142	ATGGACCATCGCCTCCAAAGC	ATGGTTGCCTTCCAGGATGAGG	8	20.6777	187	8	21.8991	183	8	18.5181	183
421	RM23144	CTCTTCGTTTCGATTCGATTGC	AATAATAATCCGCGGCACAACG	8	20.716	336	8	21.9373	334	8	18.557	336
422	AUT23145	GCTGGGCCTATATGGACTTTCG	AGGCAAGTCTTGGCACTGTAAGC	8	20.7408	184	8	21.9617	192	8	18.5819	182
423	RM3459	GCTGGGCCTATATGGACTTTCG	AGGCAAGTCTTGGCACTGTAAGC	8	20.7408	184	8	21.9617	192	8	18.5819	182
424	RM23150	TTTCGGAGTATATGCCAGTGC	CTTTCTCCAGCCTTGTTTATCC	8	20.8528	99	8	22.0918	101	8	18.6946	111
425	RM23152	CTCCCTGTGTTTCCTTCACATCC	GCGCTACAAGAGAGAAAGAAGAGC	8	20.8785	339	8	22.1124	324	8	18.7177	337
426	RM23153	CGGTATACATCGTTGGACAATTCC	GGAAGGAACTTGATGCCTAATGC	8	20.8795	194	8	22.1134	186	8	18.7187	188
427	AUT23154	GTGGATCAAACGCAGCTAATAACC	TGAGTTGAGCAAACGTCTGTTGG	8	20.9031	136	8	22.137	116	8	18.7424	116
428	RGNMS2896	AGCTTCGTCTCGTTTAGAAGT	TAAACCTAGATCTAATCCGTGG	8	20.9033	214	8	22.1372	194	8	18.7425	194
429	RM23159	CGCTACTTTCCAGCTTCCAAGG	GGTGATGTCGGTGTTCATCTCG	8	20.9616	168	8	22.2004	168	8	18.7995	168
430	RM23161	GTGGTGGTGGTGGTTGGAGAGC	CCCAACTGGGCCACAAATACTCC	8	21.0358	249	8	22.2718	235	8	18.8474	239
431	AUT23163	CCTCCAATTCCACTTCCATTGTATCC	GGTGTTATGGTGTGTGCATGAGG	8	21.062	350	8	22.2988	278	8	18.8652	278
432	RM1578	TAAAAACCTCTCAAAGCACC	GATTTCCAAGGTAGAGGGAG	8	21.062	350	8	22.2988	278	8	18.8652	278
433	RM1578	CCTCCAATTCCACTTCCATTGTATCC	GGTGTTATGGTGTGTGCATGAGG	8	21.062	350	8	22.2988	278	8	18.8652	278
434	AUT23164	ATTTCAGGGTTACAGCCCTACC	AAATGCCACATCTATCCCTACC	8	21.0667	380	8	22.3035	446	8	18.8698	383
435	RM23168	CTCCGACGTGCTCCTCTTCTCC	GAGACATTTCGTCGAACGAGTGG	8	21.1028	370	8	22.3393	367	8	18.9051	364
436	RM23169	GTTCATCCTCCTCCTCCTCACG	TTAATGTTTCCTCGGTGCAGAGC	8	21.1142	275	8	22.3507	284	8	18.9165	284
437	RM23170	AGAATCAATGCAGCGTTCTACCC	CAGCACCAGGAAGAAGAAGTCG	8	21.1386	280	8	22.3757	272	8	18.941	280
438	RM23172	TAGCTAGAGCTAGATCCAATCG	CTACTCCTCTACTTGCTAATCACC	8	21.1661	495	8	22.403	495	8	18.9666	495
439	RM23173	GGTGATTAATGGGTGGATGAAGG	GCCTAGAGTAAGTAGCCTTCACATGC	8	21.1666	290	8	22.4035	282	8	18.9672	290
440	RM23174	CAAAGAAGAGTGCTCATTGTCG	CTGAAACGTTTGCTCACATGG	8	21.1684	266	8	22.4052	274	8	18.9689	264
441	RM23175	CGTGAAACACAAGAACCAGATGC	AGCAATGTCTGCCTGCTACTGC	8	21.1782	142	8	22.415	126	8	18.9787	128
442	AUT23178	ACTGCATGATCCTCCTCAGATCC	CCCTCTGATCTCTGATACTCCATCC	8	21.2331	86	8	22.4793	84	8	19.0291	80
443	RM23181	TGTTGTTGTGAGCTAGCCAGTCG	CCGAATCACATTTCTCCAGTGC	8	21.2446	150	8	22.4868	154	8	19.0373	156
444	RM23182	GAGATGATGGTGATGGTGAACG	GCTTGAAACAGCATGTCAATGG	8	21.2456	276	8	22.4879	276	8	19.0384	276
445	RM23183	TGTAGCCAGAAGAAATGTGTCG	ATATTCTCTCTGCAGCACAACG	8	21.2478	357	8	22.49	373	8	19.0406	365
446	RM23184	CGAGAGGAGCCTTGTTAAACTCG	AGAGCATAGCATTCCTTGCATCC	8	21.2512	258	8	22.4933	253	8	19.044	261
447	RM23187	GGACGTATATGTGGAATGTACGTAGG	AAATTAGTGGGAGTGTGGTGTGC	8	21.3185	384	8	22.5668	338	8	19.1109	920
448	RM23188	AGACTTGGGAGCATAGCCTTTGG	ATTGCTCGTTGTTCGTTGTTCG	8	21.3193	393	8	22.5676	308	8	19.1122	395
449	RM23189	AGACTTGGGAGCATAGCCTTTGG	ATTGCTCGTTGTTCGTTGTTCG	8	21.3193	393	8	22.5676	308	8	19.1122	395
450	RM23190	GATGACGAGAGCGATCAACAGC	GGGTACGTACGTGTGTGAATGTGG	8	21.3238	154	8	22.5723	150	8	19.1167	150
451	RM23192	CAAGACGAAGGACGAGGAGACC	GCTAGATCAACACCAGCTTTGTGC	8	21.3299	294	8	22.5785	291	8	19.1227	294
452	RM23193	CTTGGATCCATTGTGAGATGAGC	ATAGCACTCGTCCGTGAATTGC	8	21.3303	267	8	22.5789	267	8	19.1232	267
453	RM23194	GGGTAATCCACCACTATACGACTCC	GCAACAGTACGATTCCTCCTACTCC	8	21.3368	382	8	22.5861	374	8	19.1297	382
454	RM23195	GGCAATCCAATATGGAGAAGATGG	TGACTTCCACCGGCTTAATTTCC	8	21.3374	99	8	22.5866	99	8	19.1303	99
455	RM23199	TGCCTCGCCTAAACCCATCACC	CACCACCTTCATCGTCGTCTTCG	8	21.4955	85	8	22.7369	76	8	19.2853	73
456	RM195	agaaagagaggccgtcggcggc	gggctcacccccaaacctgcag	8	21.5663	310	8	22.8112	312	8	19.3573	312
457	RM23200	AAAGCCGCAAACAAATCCAACC	GCTCACCTTGTAGCAGGCTTCC	8	21.5889	161	8	22.8208	155	8	19.3669	161
458	RM23201	GACTGATCCAGCCAGAGTTAGCC	GATACCTGCAGGAGAGAATCATCG	8	21.6113	248	8	22.8429	244	8	19.3893	248
459	AUT23202	TTTCCGGTCTCTCGCTAAGTTGC	AACCTCGTCATCGGCCTGTAAGC	8	21.6711	113	8	22.9256	105	8	19.4491	115
460	AUT23203	CAGAGTAAGACCCGGAGCCTGAGC	AGGAAGGACCTGGGCGTCAACC	8	21.6797	192	8	22.9341	183	8	19.4576	189
461	RM23204	CCTCCGACTCCTTCATGTACGC	GGAGTTGGTAACTAACCGGAAGAACC	8	21.7329	108	8	22.9881	102	8	19.505	108
462	RM23208	TGACATACGGAGTAGGTTACATCG	CAAGGTCTCTCACCCTTAAGTCC	8	21.772	285	8	23.0222	304	8	19.5361	299
463	RM23212	CACAATGCTACCAATAGCACAGC	CTTGGTTCTTGATGCTGATTCG	8	21.8496	172	8	23.0975	168	8	19.6162	172
464	RM23214	ATGATCGGCCGAATTAAGTAGC	GGCAATTTCCTAGCTATCTGTTCC	8	21.8806	186	8	23.1232	203	8	19.647	181
465	RM23215	TCCAAATCCTAGCCTCCATTAGC	CATGCTGCAGGATCTGGATAGG	8	21.8816	590	8	23.1243	505	8	19.648	566
466	RM23220	GTTATTCCGTTGCAACACACG	CCACGGGAGTGTAATATAGGAATAGG	8	21.9895	317	8	23.2452	425	8	19.7038	291
467	RM23225	GTCGCCGGATTGAGCATGAGG	ATCATCCAGGCCACGCACACC	8	22.0895	83	8	23.4278	83	8	19.7971	83
468	RM23226	AAGCCCGAAATCAATCGACTACC	TCGAAGAGAGGATTGTGCTAGGG	8	22.1544	187	8	23.4929	632	8	19.8625	187
469	RM23227	AATCGACTATCACAACACCGAACC	CCAGCTCTACCCTCTCCTCTTCC	8	22.181	122	8	23.5153	122	8	19.8882	116
470	RM23228	ATGATCAGGAGGTGGCACTCG	GCGTCCGAAATTTCACTTCTACC	8	22.2249	528	8	23.5565	539	8	19.934	537
471	AUT23229	CAAATACTTCTCCATCTGACCGTACC	GTTGCTGTCGATTCGGATTAGG	8	22.2613	184	8	23.587	162	8	19.9649	181
472	AUT23230	ACAAAGTCCACAGGCCCAGTAGC	GACTGACAGTGAGAGAGTCGTCTGC	8	22.2978	97	8	23.6259	89	8	20.0021	101
473	RM23231	TTCTCCGCAGCGACAAACAAGG	GAGGTTTGGAAACGGACAGTTTGG	8	22.324	186	8	23.6521	186	8	20.0284	186
474	AUT23242	AAACTAGTACTATGCCGCTACTGC	CATGTACTCCAAACCTCACTGC	8	22.4305	195	8	23.7302	187	8	20.145	195
475	RM23243	CACCACCATCCACACCATTCG	TAGCTAAGGTGGGCGAGGAGAGC	8	22.4688	154	8	23.7691	154	8	20.1833	154
476	AUT23244	CTGGAGATGCAGATCCTCAACC	TAGTACAACATGGGAGCCTGTCG	8	22.4691	289	8	23.7694	297	8	20.1836	296
477	RM23245	CTGTCCTACCTCGATCGATCACC	GAAGACCTTGGTGAGCCAGACC	8	22.5024	390	8	23.7957	390	8	20.2139	390
478	RM23247	TGCATTCGGAGTATTAGGATGTGC	CACGTTTCCTTCTTCAGATCATGG	8	22.5605	383	8	23.8495	198	8	20.2662	160
479	AUT23248	GACAACTCCATATCAACGCAAAGC	GAGGATGGTTGTTCACTTGTTTGG	8	22.5626	193	8	23.8516	185	8	20.2682	191
480	RM23251	TCCGATACTCCCATAGTTAGACC	ATGTGGGTTGGCTATAGTCTAGG	8	22.5728	259	8	23.8633	209	8	20.2785	235
481	RM23252	TGCAAGTGTAAGTGGTGTTTCTGG	AAGAGGCAGCTGACAATCAACG	8	22.5837	112	8	23.8731	112	8	20.2893	115
482	RM23253	TTCTTCTCACCACCTTGAAGTGC	GCATGTACTGCCTGGAAGAAAGG	8	22.5838	134	8	23.8733	134	8	20.2894	134
483	RM23258	AAGGCCCTCTCCTAGAGCATACC	CGAGCAGCGATGTCAATAAAGC	8	22.6937	193	8	23.9857	193	8	20.3693	193
484	RM23260	GCAGGTCTAATGACCTCAAGTAATGC	CCTCGACTTCAATGCACTTATGC	8	22.7764	372	8	24.0734	388	8	20.4528	386
485	RM23261	ATCAAGGACATGGCGCTGAAGG	CAGCGAGAGGAAGGTGATGAGC	8	22.7907	344	8	24.093	353	8	20.4662	332
486	RM23265	CTTACTGCCATCATCACATCACAAGC	GGCGTACGCAGTAGGGTTAGGG	8	22.8428	177	8	24.1218	163	8	20.5075	173
487	RM23266	CCATGCATTCTTACGGGATTCAGC	ATCCTTCCCGCTGGACCTCTCC	8	22.9183	224	8	24.224	218	8	20.5764	218
488	RGNMS2949	AAACTATGTGGGATTCAAACTC	TGGAACTTCTGCCTCTATATCT	8	22.9921	396	8	24.2856	440	8	20.6589	400
489	RM23267	ACTCTTACCTCAGCCGTCACACG	TTATAGATGGGTGGCCGGATGG	8	22.9921	601	8	24.2856	645	8	20.659	605
490	RM23268	GAGGACCATCTGTATTCTTGTTGAGC	CCAGGTGCCATATCCATCTTCC	8	23.0306	555	8	24.4291	479	8	20.7322	631
491	RM23269	CGTTCTTATTTAGAAGAGGCCCATGC	GCTTGGACACAGTCACACAGTTGG	8	23.0309	471	8	24.4294	1449	8	20.7325	545
492	RM23270	TCCACGATCCATCTTGTATAGAGC	GACGAATACCTCACCCATTGC	8	23.0335	192	8	24.433	186	8	20.7351	126
493	RM23276	GGCGTCAGTCTTGACTATCATCG	GTTCAGTTCCAGCCATTTGAAGG	8	23.0661	193	8	24.4784	192	8	20.7672	196
494	RM23278	TGCTGCTTATGAGGCTGCTAGG	CACTGTCCTCAGCATCACTCTCC	8	23.1478	199	8	24.5953	187	8	20.8473	196
495	RM23282	TCTACCCTTGGACGCGGTCTCG	CTGGCCAAAGCAATGGAAATGC	8	23.1798	271	8	24.6357	265	8	20.8794	271
496	RM23283	TGATCTTGGATAACTCGGTCCTACC	CACAGGGTGATTCATGTGTGTCC	8	23.2161	255	8	24.6594	197	8	20.9065	269
497	RM23285	TGGATGCGGGAGAGGTTGTCG	TTCTATCACTTTGCCGGCCTAATCG	8	23.2448	195	8	24.7157	198	8	20.9346	195
498	RM23294	GAGTCGTCACAGTCAGATCATCG	ATCGGTGGGTATTTGAAGAGTCG	8	23.3555	288	8	24.8241	253	8	21.0266	294
499	RM23295	TGGGAATCGCTACATGAGAAGC	TGATCATGGACAGGTAGGAAAGG	8	23.3594	286	8	24.8279	286	8	21.0305	286
500	RM23296	GGTACTTGAGGATCCAGGTGAGG	TCGTGGAGAGAGGCTACAACTGC	8	23.3806	390	8	24.8732	378	8	21.0517	390
501	RM23299	CGACGAGCAAGTAGAGCACACG	AGAATCTGACGACTGTGGGAACC	8	23.4426	156	8	24.9278	156	8	21.1079	159
502	RM23300	CGGACCAGCTCTTCTCCAAGG	AGCATCTCCTTCCACCTGACG	8	23.4643	198	8	24.9377	204	8	21.1142	204
503	RM23303	CCCTTTCGTTCGTCAGTAGTCC	AGAGAAGGTGCGGGTATAGAGG	8	23.4749	307	8	24.9486	313	8	21.1246	307
504	RGNMS2933	AGCATGCTTTACTCTTTACCAT	AATTTCTTCTGGAAACAAACTG	8	23.4753	272	8	24.9489	269	8	21.125	272
505	RM23304	CAGGCTTGTTTATTCTGCAACTCC	ATGAAGTGCTCGATCGTCATGG	8	23.5378	292	8	25.0301	668	8	21.1867	296
506	RM23310	GATGAGGCCCAGATTTACATTTCC	CTAAGACTTCCTGACGATGTCAATGC	8	23.6388	362	8	25.1206	284	8	21.2591	282
507	RM23311	GCGAACTTGCCGTTGGAGAGC	CACTTCGGGATGTAGCCCATCG	8	23.642	287	8	25.1237	289	8	21.2622	284
508	AUT23312	CTGCAACCTGCACGAGTACACC	GTCCCATTGGATAGAATCCCAGAGC	8	23.6463	283	8	25.128	250	8	21.2665	277
509	RM23315	GCTTCGATTTAGCTATTGGTACGG	GTGCCAGCATGAAGAGGTATGG	8	23.6776	93	8	25.1799	90	8	21.298	93
510	RM23325	CAGCTAGTGCCGGAAAGATTCG	CCCATGCAGTATATTTCGGTTGG	8	23.7444	199	8	25.2642	184	8	21.3682	166
511	RM23326	CATGCATGTCCACCAAGTAAAGG	TGTACTGTGGACCGGTTGTTGC	8	23.7466	165	8	25.2664	167	8	21.3704	163
512	RM23327	AGACGAAGGTAGTGCATAATAGGG	TTGGATTGTTACGTGCACAGG	8	23.7495	451	8	25.2692	441	8	21.3732	405
513	RM23328	GTTCTTGAGGCACTCCCGATACC	CTTAAGCTCGCCAAGAACACACC	8	23.7531	291	8	25.2818	291	8	21.3767	290
514	RM23330	AAACCGAGACGAGAGAAAGTTGG	GGTTTATACCGGGAGGGAAGTAGC	8	23.9222	178	8	25.4659	178	8	21.5333	178
515	RM23331	CCCTCCCGGTATAAACCCTATCC	AGCTAAACGGCAACGACTAAACC	8	23.9223	270	8	25.4661	270	8	21.5334	269
516	RM23332	CAACCCTCCATCACTCACTTCTACC	GATGCATCCAGAGACCAAAGACC	8	23.9328	459	8	25.4766	451	8	21.5439	425
517	RM23335	GCCATGCTCCAATCAAGAAACC	TTCCCTTCTTCACGTGTAGTCTCACC	8	23.9844	160	8	25.5278	152	8	21.5942	160
518	RM23338	CAGATGGCGAGTTGTCAGTTGC	CATCTCGCCGATCCAAGTAAGC	8	24.076	231	8	25.6201	231	8	21.698	231
519	RM23340	GACGCTGTAGAGACACAGATACATGG	CTGTTGGTGATGGCCTTAGTGC	8	24.1102	396	8	25.6564	396	8	21.7323	408
520	RM23341	AAGCTGCAGTTGGGTGAGAAGC	GCCCAAGATACAGCAAGTTCTCG	8	24.1203	483	8	25.6664	483	8	21.7407	479
521	RM23345	GAGATCCTGCACATCTTTGAGACC	TGTGCCACGAAACAAATCTAGGC	8	24.171	228	8	25.7221	204	8	7.2751	210
522	RM23347	CGGTCGGAGGTGTACACGAAGC	GAGGAGATCCGGTGGGATTGC	8	24.2017	235	8	25.7519	235	8	21.7757	235
523	AUT23348	GTCGCTGGATGCAGCAAACTGG	GCCGAAGCGTTGCTCTCTACTCC	8	24.2098	161	8	25.76	161	8	21.784	163
524	RM23353	ACATGTCACTATGTCAGGGTTGC	TTTCTCCCTGTTCCATACATGC	8	24.3269	164	8	25.8771	164	8	21.8918	136
525	RM23354	TGTCAGTGAGGTAGGTCAATAGC	AGGCCCTAAGTCATATCTTCC	8	24.3302	199	8	25.8805	199	8	21.8952	214
526	RM23355	ATTCACATCCAAGCCACACAAGC	AGGAGACGGTGGCTATTCTTGG	8	24.3327	199	8	25.883	199	8	21.8977	199
527	RM23358	CAGAGAGGTGAGATTGTGACG	ACAGTAACAGAGTGCTGAAACG	8	24.4728	379	8	26.0242	379	8	22.039	359
528	RM23359	TTGCTACACCTTAGCTGCTGTGC	GGTGTTCTTGTTGCTAGGAGATGC	8	24.4773	299	8	26.0287	299	8	22.0435	299
529	RM23360	AGCATGTTCAACTTCAGGTGTCG	TGCAGATGCTAGTGTAGACCAAGG	8	24.536	98	8	26.0865	101	8	22.0938	101
530	RM23361	TCCTCTCGTCATCTCACCTCACC	CTCACCCACTCCTGTGTGACTCC	8	24.5524	177	8	26.1029	177	8	22.107	180
531	AUT23362	CTCATCTCCGCCCTTGATTCC	GCCCATCAACCTCGTCTTCACC	8	24.5694	175	8	26.1199	190	8	22.1236	417
532	AUT23367	CCAGTGTCGCACACTAATCTTCC	ACGAACATAGCGCCAAATCTCC	8	24.658	355	8	26.2113	373	8	22.2123	346
533	AUT23368	CCAGTGTCGCACACTAATCTTCC	ACGAACATAGCGCCAAATCTCC	8	24.658	355	8	26.2113	373	8	22.2123	346
534	RM23369	CTACTCCTGCACCACCATCACC	GTCTTGGAGAAGATCCTGGAAGC	8	24.7095	128	8	26.2587	128	8	22.2519	128
535	AUT23370	CAATGTAGGATCTGTTCGGATTGG	GCAGATGTGGATAATGGATGTGG	8	24.7147	394	8	26.2639	412	8	22.2571	403
536	RM23371	GAAGCAAAGCTGTTGTCAGTTGG	GGGTGCAAAGAGCAGTGTAAGG	8	24.7155	99	8	26.2647	99	8	22.2578	99
537	RM23372	CTCTCCTCCTCACCTACGCATCC	GAAGTCCGGCTGGGAGTAGTGC	8	24.7612	288	8	26.3103	288	8	22.3206	288
538	RM23373	CCGTAACCTTGACTTGTGAGAGC	AAGTTACGGCCTCAGTCCTCTCC	8	24.8003	85	8	26.3495	87	8	22.3603	87
539	AUT23375	GGAAGCCTTTCCTCGTAACACG	GAACCTAGGCCGTGTTCTTTGC	8	24.8121	230	8	26.3613	239	8	22.372	579
540	RM149	GGAAGCCTTTCCTCGTAACACG	GAACCTAGGCCGTGTTCTTTGC	8	24.8121	230	8	26.3613	239	8	22.372	579
541	OSR7	gctgaccaacgaacctaggccg	gttggaagcctttcctcgtaacacg	8	24.8123	243	8	26.3615	252	8	22.3725	592
542	AUT23378	TCGGATGAGTCCTTCGGTTTCC	TCTCAGCTCGATCTCCTCTCTAGACC	8	24.8506	247	8	26.3999	235	8	22.4104	243
543	RM23380	TGCAGAAGAACTACTGAGAGAAGACG	CATCTCCTTCAACCTGCCTTCC	8	24.8842	134	8	26.4334	134	8	22.4624	134
544	RM23381	CAATGAACTGGTGCTACTTGC	ACATCTAGGTGCAGAGAGAAACC	8	24.8843	97	8	26.4335	99	8	22.4626	101
545	AUT23383	ATCGAGCACGCATACCTCACG	CGTGGTGTTCAGTTCATCTCTGTGC	8	24.8998	197	8	26.4487	195	8	22.4778	203
546	RM23384	CTTGCATCTCACTCACACAACAAACC	GGACATGTCGGCGTAGGAGAGG	8	24.9152	209	8	26.4726	209	8	22.4909	209
547	RM23385	GACAAATCCTACGCCCAAATTCC	AATCTTCTTGGTCCACGGTCTCC	8	24.9208	146	8	26.4783	144	8	22.4965	146
548	RM23386	AGGTTGACCTGTGTGAGTAGCAAGG	ACATCGCCAACCATCTCAAGG	8	24.9237	293	8	26.4812	262	8	22.4994	251
549	RM23390	GGTGGTTGCATCCCTTTAGACC	CTGGTTAGCGCTATGTTTCTTGC	8	24.951	198	8	26.5083	222	8	22.5332	889
550	RM23391	GAAGTGAAGTGAAGCAGCCAAGC	GTAGGATACAGGGCAGCGTAAGG	8	24.9935	177	8	26.5509	177	8	22.5783	177
551	RM23396	CGCATCAGAGACAGGTGTCAGC	GATTTGGGAGAGCAGGGTTGG	8	25.0264	174	8	26.5773	174	8	22.6049	174
552	RM23397	CAATAAATCTCGCCCTCGTTGC	GTGAGGTCGGCCTTGAAGTACC	8	25.0267	332	8	26.5776	332	8	22.6051	335
553	RM23398	TTCACATGAACCGTGTACTACCTACC	TGCAGTCACAACATAGATCGAACC	8	25.0351	241	8	26.586	253	8	22.6136	490
554	RM23408	CCATCTCAACTCCTTCGTTTACTGC	TCGACTGTTTGCTTGGAATAGGC	8	25.1704	296	8	26.747	274	8	22.7468	236
555	RM23409	ATCAGGAAGCTGCAAGAACTCG	TTTGGAGTGGTCCTTGTACTGC	8	25.1794	179	8	26.756	163	8	22.7558	175
556	RM150	cacgacgacgacgagcagcagc	gctcgagggagagcgacctgcc	8	25.3119	319	8	26.834	319	8	22.8871	319
557	RM23419	ACCTGAGCTCGATGGTTCTTTCC	GCTCCCACCAAGTATTCCTATCG	8	25.3176	262	8	26.8283	256	8	22.8927	199
558	RM23420	GATGGGACATTCAATTCACTCG	GACTGTGCAGGAGTAGCAGTAGTACG	8	25.328	370	8	26.8909	370	8	22.9027	370
559	RM23421	ATGGACATGTGGTTAAGCATCG	TGCCAAGTAAGGACATACTCTACTCC	8	25.3416	233	8	26.9063	255	8	22.9163	227
560	RM23422	GTCGGTCACGAAGTTCAGATCC	TCAGGCAAAGTTGAAGATGGTAGC	8	25.3419	185	8	26.9066	185	8	22.9166	185
561	RM23423	CGGCGGATAGTTAAAGAAGATCG	GCAGGTTACCGCAATAGCATCC	8	25.3513	190	8	26.9158	190	8	22.9261	190
562	RM23426	CATCATGTCGCGGTAGAACTCG	AGAGGTACAGTGGCACGATCAGG	8	25.4153	130	8	27.0144	130	8	22.9846	130
563	RM23427	AGGGAGTCGGAGACCATGACG	TACCGCGTATCATGTCCTTGACG	8	25.4292	149	8	27.0283	146	8	22.9986	149
564	RM23428	ACAGTACTAGCACAGCTGAAGGAAGG	GCAGCGATAACCACATTTCTTGC	8	25.44	84	8	27.0391	84	8	23.0094	84
565	RGNMS2682a	TACTACTGTTCGTTTCTGCTTG	AGAGAAATTATGCAGAAGAAGG	8	25.4434	388	8	27.0424	388	8	23.0127	388
566	RM23430	AAAGCTAGCCCAGGGTGAAGC	GAAATGGACAGAGGTATGGTACGC	8	25.4465	299	8	27.0455	297	8	23.0158	300
567	RM23432	GCCTTGAGGATAAGAACCACAGG	GAGGTTGGTAGATTCGCATTTGG	8	25.4688	173	8	27.0678	173	8	23.0384	170
568	RM23434	GGAATCCGGTACCACGAGAAGG	TCTCCTCTCAAGGATCCAAAGACC	8	25.4896	101	8	27.0886	101	8	23.0593	101
569	RM23435	CACGTTACATAGCTCACCATACACG	GTAACGTTGTCAGCCCTCTGTCC	8	25.5023	396	8	27.1013	396	8	23.0719	401
570	RM23436	TGAGTCACCGTGCACCATCTCC	GTGGTGGTGCGAATCACTGTAGG	8	25.5697	169	8	27.169	169	8	23.1391	169
571	RM23437	TCGATGGAGGAGGAGGAGTACG	AAATTGATCGCTCCTCCACTGC	8	25.5774	99	8	27.1768	99	8	23.1469	99
572	RM23438	CTGTTCAGAGTAATCCGTGAATGC	GTCCGTCCTGCAGATAATTTATGG	8	25.5794	118	8	27.1788	118	8	23.1489	118
573	RM23440	CACGAGTGAGCTTAGTGGTTTGG	GCTGGATATGCTTGTGTTGATTGG	8	25.6535	148	8	27.2121	144	8	23.2113	142
574	RM23444	CCTTGAAAGGGAAGAAGGGAAAGG	CAGGCCACAGCAGAGATGTTCG	8	25.7356	184	8	27.3703	184	8	23.2838	180
575	RM23445	ATGGCGATGGAGGCGTACTGG	CGTACTCGAAGCTCAAAGTCCATCG	8	25.7404	293	8	27.391	296	8	23.2886	293
576	RM23446	TACCGACCTGATTCGAATGAACC	TACGGATGTCGAGGAGAAGTTCG	8	25.751	198	8	27.4016	198	8	23.2992	174
577	RM23447	TACCGACCTGATTCGAATGAACC	TACGGATGTCGAGGAGAAGTTCG	8	25.751	198	8	27.4016	198	8	23.2992	174
578	RM23448	GAACTGTGGTACTTGGTACAGTCACG	TCAGAGACTTCTCATCTCCTTTGG	8	25.7537	106	8	27.4043	106	8	23.3019	106
579	RM23449	CCAATGGTACGTGTGTTCATCC	CGATCGGAATCTCATCGAAGG	8	25.7833	142	8	27.4317	142	8	23.3283	140
	RM419	TCTCCTTTGGTATGCGTGTG	GCTGCTGCTCCACTTTTCTC	8	25.8289	207	8	27.5523	207	8	23.4525	199
580	RM23452	GTAAGCAATGCAAGGCAAACTGG	TTCCAAATAGGCAGGGATGTAGC	8	25.9121	182	8	27.5575	182	8	23.4577	182
581	RM23453	TGGCAAGGGAAGTAAATGAGTGG	GAGAGAGATGCAATGCAACAACG	8	25.9168	184	8	27.5622	184	8	23.4625	184
582	AUT23454	TTCCTTCCCAGTGATTTCTCTCC	CCCTTTCTCCTCCTTTGGTATGC	8	25.9169	192	8	27.5623	192	8	23.4626	184
583	AUT23456	AAAGGAGGAGGAATGCACAAAGC	AATCTCTCGATCCGCTCGATCC	8	25.9523	446	8	27.5969	446	8	23.4985	446
584	RGNMS2856	CTTTCTTTGGTTCTTGTTGTTT	CTCTGAAACCTCTTCCTTTATG	8	25.9652	327	8	27.6098	327	8	23.5114	329
585	RM23458	CCCAATTTCACCACCACATCACC	GGCGCCGAAGAAGAAGAAGAGG	8	25.9763	324	8	27.6204	321	8	23.5228	321
586	RM23459	GAGGGAGAGGCGAGGTGTAAAGAGG	GACCTCCCTTGGAACGGACACG	8	25.9793	196	8	27.6233	196	8	23.5258	184
587	RM23460	GAAGAGAGCTGATTCAGGAGAGAGC	ATAGTTAGGCAGCAACAGCAACG	8	26.022	186	8	27.6574	156	8	23.5547	158
588	RM23461	CTCTCCATTGGTGGAGGTTTCC	ACGTGCACACCTTAAGTTTCAGC	8	26.0479	139	8	27.6787	139	8	23.5802	139
589	RM23465	GGCACTACTTGTACCATTTCGTATGC	CCTTCCTCCTCCCAACACATACC	8	26.2078	99	8	27.8409	99	8	23.7337	99
590	RM23466	GTCATCCGCTACATTCCCAACC	TTTCCAGATGACGGTGAAGAGG	8	26.2352	140	8	27.8686	149	8	23.7611	140
591	AUT23467	CGCACAAACCAAACACACAACC	CTCGTGTCGTCTTCACCAAAGC	8	26.2356	277	8	27.869	255	8	23.7615	259
592	AUT23468	GCGGTAACAAACCAACCAACC	AAAGCAGGACACAGTCACACAGG	8	26.2362	194	8	27.8695	168	8	23.762	640
593	RM23469	CAACAGAAGCCATTAGGCATTAGC	ACCGAAGTGATCAACAACCTACC	8	26.2411	239	8	27.8736	236	8	23.7674	238
594	RM23470	CTTTCCTCTTCGCTTCTTCTCTCG	CGACACCTGTAACCCAAACATGG	8	26.2465	197	8	27.8933	197	8	23.7725	197
595	RM23472	AAGAACATTCCGGCGAGGAACC	TCACCGTCTCCCTCCCAACTCC	8	26.3262	294	8	27.9949	296	8	23.853	294
596	RGNMS2817	CTATTTAAGCCAAATGGATCAG	GAACTACGAGAGCTCAACAAG	8	26.3265	402	8	27.9953	404	8	23.8533	402
597	RM23473	CGTACTCAGGCTAGGGCAAACC	CGTCTTCCCGGTGAGATTTCC	8	26.3322	257	8	28.0166	257	8	23.859	257
598	RM23478	CGACGCAGGGTTTAGATAGAGTGC	GTTCTCGTTCCGATGGCTAGACG	8	26.3981	177	8	28.0843	174	8	23.9293	177
599	AUT23479	AAATCCAAGAAATGGCGGAGAGG	AGCTGGAGCGGATCAAGAACTCC	8	26.4101	259	8	28.1048	259	8	23.9413	259
600	AUT23480	CTCCCAGTCACCCTGCTACTCC	TGTGTCACGTTCGTTGCTACTCC	8	26.4104	140	8	28.1051	137	8	23.9416	134
601	RM23481	ACCGAGCCTCTCTTAGCTTCTTCC	GCTCCCTCACCAACCTCAAACC	8	26.4302	273	8	28.125	270	8	23.9617	273
602	AUT23485	CTGATTTCAGCTTGTCAACCATCC	CAGAGCTACTGGAACTGGTCATGG	8	26.4689	293	8	28.1556	284	8	23.9828	278
603	RM23486	GATTGATTAACCTCGTGCTCTTCG	CTGATCAACCACGCTGAACTCC	8	26.4723	133	8	28.1587	130	8	23.9859	130
604	RM23489	AGCAGGAGGAGGAGAAGGGAAGG	CGAGCCACTGCTTCTTCTGTGC	8	26.4964	75	8	28.1827	108	8	24.01	75
605	RM23490	GCAGGCGAGGTGGTTAGATTGC	ATCTTCGACAGCGGCTGGAACC	8	26.5226	175	8	28.2123	166	8	24.0366	175
606	RM23491	GGAAGCAGGAGAGGTAGTTAGATTGC	CGTGATCTGAGTGCAAGAATTTCG	8	26.5276	396	8	28.2159	396	8	24.0401	400
	RM447	CCCTTGTGCTGTCTCCTCTC	ACGGGCTTCTTCTCCTTCTC	8	26.5497	110	8	28.2282	116	8	24.0526	110
607	RM23493	GATCACGAGAACGGCATAAACC	ACAACACAAGTTCAGCACACTGG	8	26.5525	358	8	28.2373	359	8	24.0652	368
608	AUT23494	CATCTCTGTTCCACTTGCTTTGC	CTACCAACAACCCAACAAGAAGG	8	26.5829	171	8	28.2626	165	8	24.0864	163
609	RM23495	TTCACCCGTTACAAATGGAGAGC	GGCTGAAGCCTGAAAGTATGTGC	8	26.5953	177	8	28.2767	177	8	24.1006	171
610	AUT23499	ACGGGCTTCTTCTCCTTCTCTCC	TCCCTTGTGCTGTCTCCTCTCC	8	26.6377	111	8	28.3282	117	8	24.1526	111
611	RM23502	GGCTAAAGCCTCAGAGCCAACC	ATTTCGTTCGTTCGTTCGTTCG	8	26.6648	143	8	28.3556	139	8	24.1793	143
612	RM23510	CACTCACTCACTCACTCAAAGC	TTAGCAGTGTGGATTACTACCG	8	26.8141	164	8	28.4195	164	8	24.2552	160
613	RGNMS2853	GTGTGGATTACTACCGAACTTT	TTCCATTGATTTCTGAGTTGTA	8	26.8143	303	8	28.4196	303	8	24.2554	299
614	RM23511	CCCTGCTGCACTGTGTGAACTGC	CCTCTCCGGTGTTGCAGGTAAAGC	8	26.8163	285	8	28.4217	282	8	24.2574	285
615	RM23512	GGACACATGGTAGTTTAGATGAGC	GGATTCTTATCCTCCTGTTTGG	8	26.8248	362	8	28.4303	392	8	24.266	336
616	RM23513	TCAGATAGCACTCCCATCTCACC	AGCCTAGGGTTTACCAGGTTTGG	8	26.836	163	8	28.444	163	8	24.277	193
617	RM23517	TCCGAAGCAACAACAAACCAAACC	TCCAAATTCCAATCCGGTAGGC	8	26.8735	100	8	28.4523	100	8	24.3148	94
618	RM23518	TTTCGCTTCTGAGTTGGCAGAGG	GACCTGAACAACGTGCCAAACG	8	26.9145	293	8	28.5406	291	8	24.3556	253
619	RM23519	ACGTTGTGTTTGTGAGAGACAAGC	TGCAGTTGGCTTTCAATTCAGG	8	26.9194	193	8	28.5476	191	8	24.3603	205
620	RM23520	ACGTTGTGTTTGTGAGAGACAAGC	TGCAGTTGGCTTTCAATTCAGG	8	26.9194	193	8	28.5476	191	8	24.3603	205
621	RM23521	GTAGAGCAAGTTTGGCTCCTTGG	CACTGCACACTGCCAACTTATCC	8	26.9313	159	8	28.5596	157	8	24.3723	138
622	RM23522	CTAGCTAGCCAGCCAGCGTAAGG	AGAGCGCAATGTAGACGGTCAGC	8	26.9353	326	8	28.5636	305	8	24.3763	306
623	RM23523	CTTGACTGTGTGTTGTGTTGATGC	TCTGAGGAGTAGAGACGACTGAACC	8	26.9365	183	8	28.5647	1123	8	24.3774	167
624	RM23525	GCTGAGAGGAAGAAACCATTAGC	TTACTCAGGATGCACGGAAGC	8	26.9653	268	8	28.6048	265	8	24.421	270
625	RM23532	TATTGCCATGAATGCTGGGAAGG	GGCATCGCAATGACAAACATCC	8	27.1379	305	8	28.7578	301	8	24.5506	299
626	AUT23535	TGTGGAGTGTGGAGGCGAGAGC	AGGCACCCACCCACTGACTTCC	8	27.1974	198	8	28.8275	198	8	24.5961	196
627	RM23545	CAACGCTATTGATGCCTCTCTGC	ATCCTCTGCCATCGTCTTCTTCG	8	27.3168	574	8	29.0172	509	8	24.7307	504
628	RM23546	CAACGCTATTGATGCCTCTCTGC	ATCCTCTGCCATCGTCTTCTTCG	8	27.3168	574	8	29.0172	509	8	24.7307	504
629	RM23547	CAACGCTATTGATGCCTCTCTGC	ATCCTCTGCCATCGTCTTCTTCG	8	27.3168	574	8	29.0172	509	8	24.7307	504
630	RGNMS2676	GATTGTAGGATAGGTATGGTGG	CTTTCCGGTAAATGTAAGGTAG	8	27.329	347	8	29.0336	347	8	24.7445	347
631	RM23552	TCTCTTCCATCGGATTCTCATGC	CTTGGTGCAGCGTGCTAATAGG	8	27.3394	91	8	29.0441	91	8	24.7549	91
632	RM23553	TCACTGTACGTGCACTATCCTAACC	GGAGACAAATGTATTGGGAGTAGG	8	27.341	313	8	29.0457	301	8	24.7565	243
633	RM23554	TTAAAGCTAGCCGTAGTACTCTCACC	GGATGGCATGCATGTAATATGG	8	27.3508	180	8	29.0506	126	8	24.7614	122
634	RM23555	GCCGACTTGACGAAATTGTGC	CCTATCCATGAGGCAACCATGC	8	27.3969	241	8	29.0998	244	8	24.8087	244
635	RM23557	CTCTGCAAACACTGTGACTTTGG	ATGATCTTGAGGGTGTTCTTCG	8	27.404	163	8	29.1115	163	8	24.8146	167
636	AUT23561	ACCAACAAATGGGTCGTATTGG	CTACGGATTTACCCAGAAACATGG	8	27.4199	393	8	29.136	399	8	24.8383	388
637	RM23569	AAAGATCCAAGTAGTCGCCATCG	TTTCCGCTCCAGGTGTCTAGG	8	27.4664	74	8	29.1792	118	8	24.8857	86
638	AUT23570	TAGACAATGGTCTGCAACTCTGC	CAAGGAGATTGGATTGCTGTACC	8	27.4812	187	8	29.1981	178	8	24.9006	184
639	RM23571	GCGATCTGGACGGTATAAAGTGG	CATCGAATATGAGCAGCTTCTTCC	8	27.4918	356	8	29.2086	356	8	24.9111	359
640	RM23572	TCGTAGCCTTCGTCCACCATGC	CAGATGGTGGAGGCCATGAGG	8	27.51	187	8	29.2269	187	8	24.9296	187
641	RM23573	CACCGTCGAAGTGTCAAACAACTGC	TGGAGTCCTGGAGTCAAAGGTAAACG	8	27.5164	319	8	29.2333	319	8	24.936	323
642	AUT23574	TGGGATGAACGAGCGTGTATGG	ATGCTAATTTCCTGACTGACCCAACC	8	27.5366	475	8	29.2641	455	8	24.9562	445
643	AUT23576	CTCCTAAAGCTGCCTCCTCTTGC	CCTCTCCCTAGCATCCCATCC	8	27.5478	197	8	29.2769	201	8	24.9674	197
644	AUT23578	AGCGATTCAGAACGAATCAACG	TGCCAAAGCTACACAAATCTGACC	8	27.5611	286	8	29.2956	510	8	24.9805	595
645	RM23579	TCAGTGATTGTGAGTGCACAAGG	TCATCATCATGGTCCATCACTCG	8	27.591	151	8	29.3261	145	8	25.0103	151
646	AUT23580	AGTGATGGACCATGATGATGACG	CCTCCCTTTCTCCTTGTCTCTCG	8	27.5911	217	8	29.3262	202	8	25.0104	217
647	AUT23581	CGGCAAACTCTACGAGGTAATGC	CACACGTTCTTCTCCTTCATCTCG	8	27.6509	159	8	29.392	159	8	25.0637	147
648	RM23583	CATTGCTGCCCGAGTACCTACG	GACTCCGCCTCTCTCCTTTCG	8	27.6659	371	8	29.4061	399	8	25.0797	367
649	RGNMS2838	CATATCTATCCAACCGAAACTT	GATGACAGTATACTTGCACGAG	8	27.7326	298	8	29.4876	298	8	25.1517	298
650	RM23586	TTCTGTGGATAGCTGGAACATGC	CCAGATACATCATCAGGAAGGAAGG	8	27.7327	169	8	29.4877	169	8	25.1518	169
651	AUT23592	GGAAGCTCTTTGCCATCATACTAGC	GAATATAACACCCACTCCCTCTGTCC	8	27.9083	191	8	29.6463	183	8	25.3282	197
652	AUT23593	GGTATACGGCCCTTCAAGTACACG	TGCAGAGAAAGAAGGGAAGATCG	8	27.9301	242	8	29.6969	234	8	25.3506	614
653	RM23594	GGAAGGAAGGAAGCAAACTGACC	CTCACGACAAGCAAACCCAACC	8	27.9561	197	8	29.7224	197	8	25.3771	197
654	RM23595	GCTCTGAGTTGGGATCATCACG	TCTAGGTGACGCTTGTAGGATGG	8	27.9604	238	8	29.7258	234	8	25.3814	238
655	AUT23600	TTTGATTTGTGCAGGGATACGC	CTGCAGCAGAAACACGAAGAGG	8	27.9881	187	8	29.7907	184	8	25.4091	187
656	AUT23602	GAGGAAGAGGAAGGGACTCACC	TTGCGTCCTACTGCTACTTCTTCC	8	28.0145	196	8	29.8555	213	8	25.435	196
657	RM23603	CACTCTTGATTTCTGGACATGG	TTTACTGCTCGACATGAAGTGG	8	28.049	187	8	29.9091	196	8	25.4696	187
658	RM23604	GAGAAACCCTAGGAGACGCTTGC	GTGGGAGGAGAGCAGGTAGAAGC	8	28.0586	82	8	29.9188	105	8	25.4792	95
659	RM23605	TTCTCTAGATAGAACTCAGGCTCTGC	TGGATTAGCCGACTAGGTTAGAGC	8	28.1105	335	8	29.9683	861	8	25.5178	267
660	RM23606	TTCTCTAGATAGAACTCAGGCTCTGC	TGGATTAGCCGACTAGGTTAGAGC	8	28.1105	335	8	29.9683	861	8	25.5178	267
661	RM23610	GTACAATGATGCGCAAGCAAAGC	CATTGCTGTTACACCCTCCATGC	8	28.1472	249	8	30.0016	249	8	25.54	249
662	RM23611	ACACGGTCTTTGCTGCTCTGG	AGTGGCACATGAACCCACTTGC	8	28.1503	140	8	30.0047	125	8	25.5431	140
663	RM23612	CGATCGACCACAAGTAGAGTACG	CAATCACGTACAGGCAAGATCG	8	28.1565	152	8	30.0104	201	8	25.5496	189
664	AUT23613	TGGATCCATTCCATTCCATTCC	CCGAGAATACGCATAAAGCTTGC	8	28.1659	279	8	30.0303	275	8	25.5591	279
665	RGNMS2952	TTATATCTCGCGGTATAGTTTG	TCCTTTCATTTCTACCACTACC	8	28.1661	239	8	30.0304	235	8	25.5593	239
666	RM23614	AAATGATCGATGGGAGCATTCG	GTCAAGTTCACCGGCAAGAACG	8	28.1712	381	8	30.0356	381	8	25.5645	381
667	RM23616	TTCGAAAGAGAGGTTGTACTCC	ACAGGATGACACACAGAACTAGC	8	28.195	640	8	30.0463	626	8	25.5751	630
668	RM23617	ACTACTGCATGCCCTCCACTACC	CAGCACACTACACTAACTGCAAACG	8	28.198	268	8	30.0492	201	8	25.5781	213
669	RM23618	ACTACTGCATGCCCTCCACTACC	CAGCACACTACACTAACTGCAAACG	8	28.198	268	8	30.0492	201	8	25.5781	213
670	RM23619	ACTACTGCATGCCCTCCACTACC	CAGCACACTACACTAACTGCAAACG	8	28.198	268	8	30.0492	201	8	25.5781	213
671	RM23621	CTGCATTACTGCTGGTTGGTAGC	CCCATGAAGAAAGCACTCAAACC	8	28.2144	194	8	30.0655	182	8	25.5941	194
672	RGNMS2696	GTAGCCAATCTTGTTCTTCTTC	CTAAGCTAGTAAGGTGATTGGG	8	28.2145	335	8	30.0656	323	8	25.5942	335
673	RGNMS2739	GTAGCCAATCTTGTTCTTCTTC	CTAAGCTAGTAAGGTGATTGGG	8	28.2145	335	8	30.0656	323	8	25.5942	335
674	RM23622	AGGAGTGCTATGGCGTCTTCTGC	AAGAAAGGGAGGCGTAGGTAGAGC	8	28.2296	128	8	30.0773	124	8	25.6087	128
675	RM23627	GCTGGCTCTGCACCAAGTAAGG	ATGCTCTTAACGGATGACGAAGC	8	28.2446	256	8	30.0921	262	8	25.6233	256
676	AUT23633	CCCTTGTGGTAGACTTTCTTAGCC	GGCATACTAAGAGGTCCCTAGTTGG	8	28.2915	146	8	19.2445	122	8	25.6645	126
677	RGNMS2908	GCATAAATACTACTCCCTCCAT	ACTCTCAAGTCAACTTCATTCC	8	28.31	233	8	30.1516	221	8	25.6827	233
678	RM23635	CTACAGCTTTGACCACCAGTTCG	TGGCATCCTAGATTCCTAGCTACC	8	28.3257	299	8	30.1623	262	8	25.6883	391
679	AUT23636	TGCCGCTTATACAGGCTTACTGC	TGGTCGCTCATGTATCTTTCAGC	8	28.3265	297	8	30.163	246	8	25.6891	249
680	RM23640	AATTGAAGGACAAGCCTCCTAAGC	CTCATCGCAGATTACCGAAGC	8	28.3475	324	8	30.1885	298	8	25.7129	269
681	RM23641	CATGCTCAGTTCGATTAGTTGAGG	AGTGACAAGGAAGCCCTAAATCC	8	28.358	140	8	30.199	140	8	25.7254	140
682	AUT23642	GTCAGCGTGAGACCAACATGTGC	TACCAGCCGTGCTCCTTGAGAGG	8	28.3628	136	8	30.2038	126	8	25.7332	120
683	RM23644	CATCTTGTTGACGATCCTGTTGC	CGAGACTCCGATTCTAGCCTACC	8	28.3931	280	8	30.2476	288	8	25.7637	254
684	RM23645	CATACAGCATGCTCACAGTTGATCG	CATCAGCATCTGGGACCTCTCC	8	28.4093	394	8	30.2645	382	8	25.7809	385
685	RGNMS2974	AATAATAATTAACGACGACGAC	TTTAGAGAGAGATGGAGCTGAT	8	28.4096	110	8	30.2647	110	8	25.7811	110
686	RM23647	CGAGCGTATAATCCAACTCAAACACG	GACTGCTTCGTCAAGCCACTCC	8	28.4401	419	8	30.3224	397	8	25.809	350
687	RM23648	CGAGCGTATAATCCAACTCAAACACG	GACTGCTTCGTCAAGCCACTCC	8	28.4401	419	8	30.3224	397	8	25.809	350
688	RM23652	GCCTCTCCTCTCCTCTTCACTCC	CGTTAGGCTTCGGATCTTGTCG	8	28.4588	185	8	30.3361	209	8	25.8249	201
689	RM23653	CTGCATGAGGGTAACCAGCTTCC	AGGAGTTGGCCGAATATCTGAGG	8	28.4685	265	8	30.3459	265	8	25.8347	265

## Sheet: Chr 9
	Marker Information			Oryza sativa ssp. japonica			Oryza sativa ssp. indica			Oryza rufipogon
Sl. No.	Marker Name	Forward Primer Sequences	Reverse Primer Sequences	Osaj_CHR	Osaj_Position (Mb)	Osaj_Exp. Amp. (bp)	Osai_CHR	Osai_Position (Mb)	Osai_Exp. Amp. (bp)	Oruf_CHR	Oruf_Position (Mb)	Oruf_Exp. Amp. (bp)	Nature of Translocation
1	RM23654	CTCCGATGCCTTCTTCCTCTTGC	AAAGGGAGTAGCAAGCCGAGTGG	9	0.099176	186	4	25.5888	183	9	0.09178	186	Inter-chromosomal
2	RM23936	GTACCACAGCTGCATCCACAAGG	CGATCCCAATGACAGGAAATACTACG	9	8.30922	397	3	9.43777	383	4	8.89278	370	Inter-chromosomal
3	RM23999	CTTCTTCCTCCGGGCTTGTCC	CTCTTGCCCTTCCAGTGTCTGC	9	9.59035	288	7	0.947047	291	9	7.52672	288	Inter-chromosomal
4	RM24140	TCCACGAGGTCACTGCGTCTCC	GGCTTCAGGGACCTCCTCTTCTTACC	9	12.4853	160	4	24.8598	160	9	9.83379	160	Inter-chromosomal
5	RM24141	GTAAGAAGAGGAGGTCCCTGAAGC	ACCATCCGAGGAATCGTAGTCG	9	12.4855	232	4	24.8596	229	9	9.83393	232	Inter-chromosomal
6	RM24365	GGGTCGAAAGCAGTACACAAAGG	AGACGTCACGTACGGGAGATGG	9	16.3073	178	3	15.9717	170	9	13.4213	172	Inter-chromosomal
7	RM24747	GCTCGCCATTGTAGTCGTACC	CGCATCAGTAGTCATCAGTGTGC	9	22.3613	197	5	10.0128	186	9	19.1132	194	Inter-chromosomal

[truncated: 3 more sheets: Chr 10, Chr 11, Chr 12]
